# Supplementary material for: Asymmetric transfer hydrogenation of boronic acid pinacol ester (Bpin)-containing acetophenones
Source: Royal Society of Chemistry journal article supplement (doi:10.1039/d2ob00569g), 2022-01-01
Supplement: d2ob00569g1.pdf [file d2ob00569g1.pdf]

Supporting information:

**Asymmetric transfer hydrogenation of boronic acid pinacol ester (Bpin)-  
containing acetophenones.**

Ye Zheng<sup>a</sup> and Martin Wills<sup>a\*</sup>

<sup>a</sup> Department of Chemistry, The University of Warwick, Coventry, CV4 7AL, UK.

[M.wills@warwick.ac.uk](mailto:M.wills@warwick.ac.uk)

**Index.**

|                                     |             |
|-------------------------------------|-------------|
| <b>General experimental details</b> | <b>S2</b>   |
| <b>Data related to Table 1</b>      | <b>S3</b>   |
| <b>Data related to Figure 4</b>     | <b>S18</b>  |
| <b>Data related to Figure 5</b>     | <b>S117</b> |
| <b>Data related to Figure 6</b>     | <b>S205</b> |

### **General experimental details.**

Reagents and solvents were used as purchased and without further purification. Reactions were carried out under a nitrogen atmosphere unless otherwise specified. Reactions at elevated temperature were maintained by thermostatically controlled oil-baths or aluminium heating blocks. A temperature of 0 °C refers to an ice slush bath, -78 °C to a dry ice acetone bath. NMR spectra were recorded on a Bruker AV (250 MHz), Bruker DPX (300 or 400MHz) or Bruker DRX (500 MHz). Chemical shifts are rounded to the nearest 0.01 ppm for <sup>1</sup>H spectra and the nearest 0.1 ppm for <sup>13</sup>C spectra and are referenced to the solvent chemical shift. Coupling constants are rounded to the nearest 0.1 Hz. Mass spectra were recorded on an Esquire 2000 and high-resolution mass spectra were recorded on a Bruker Micro ToF or MaXis. IR spectra were recorded on a PerkinElmer spectrum100 and peaks are reported in wavenumbers. Optical rotations were measured on an Optical Activity Ltd. AA-1000 Polarimeter and are reported in deg dm<sup>-1</sup> cm<sup>3</sup> g<sup>-1</sup>. The chiral GC measurements were performed using a Hewlett-Packard 1050 instrument linked to a PC running DataApex Clarity software. HPLC measurements were performed out using a Hewlett Packard 1050 Series with a quaternary pump, autosampler and variable wavelength detector linked to a PC running DataApex Clarity software. Melting points were determined on a Stuart scientific melting point apparatus and are uncorrected. Flash column chromatography was performed using silica gel of 230-400 mesh size. Thin layer chromatography was carried out on aluminium backed silica gel 60(F254) plates, visualised using 254nm UV light, potassium permanganate or cerium ammonium molybdate (CAM). Column chromatography was performed either by gradient elution (reported as a range, e.g. EtOAc/Petroleum ether (2-12%)), or by isocratic elution.

### Data related to Table 1.

1-(4-(4,4,5,5-Tetramethyl-1,3,2-dioxaborolan-2-yl)phenyl)ethan-1-one **6**.

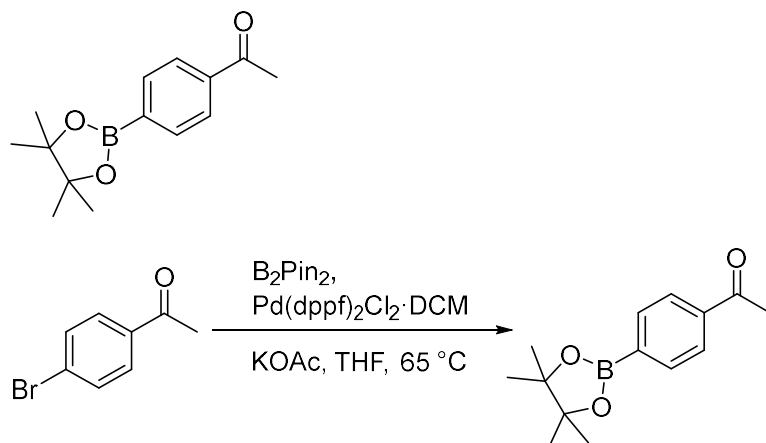

This compound has been reported and fully characterized: J. Ratniyom, N.

Dechnarong, S. Yotphan and S. Kiatisevi, *Eur. J. Org. Chem.* 2014, 7, 1381-1385.

A round-bottom flask was charged with 4'-bromoacetophenone (995 mg, 5.00 mmol), bis(pinacolato)diboron (1.52 g, 6.00 mmol), potassium acetate (1.47 g, 15.0 mmol), THF (30 mL) and  $Pd(dppf)_2Cl_2 \cdot DCM$  (204 mg, 0.250 mmol). The reaction mixture was heated to  $65\text{ }^\circ C$  and left stirring under the nitrogen atmosphere overnight, followed by TLC (9:1 hexane: EtOAc). The mixture was quenched by distilled water (20 mL). EtOAc (20 mL) was added and the organic layer was separated. The aqueous layer was extracted with EtOAc ( $3 \times 20\text{ mL}$ ), and the combined organic layers were dried ( $MgSO_4$ ) and filtered. Solvent was removed to give the crude product. The product was isolated via flash chromatography on silica eluted with 0-20% ethyl acetate in hexane to give 1-(4-(4,4,5,5-tetramethyl-1,3,2-dioxaborolan-2-yl)phenyl)ethan-1-one **6** as a yellow solid (896 mg, 3.64 mmol, 73%). TLC:  $R_f$  ca 0.50 (9:1 hexane: EtOAc), strong UV and  $KMnO_4$ ;  $\delta_H$  (400 MHz,  $CDCl_3$ ) 7.94 (2H, d,  $J = 7.9$ , ArH), 7.90 (2H, d,  $J = 7.9$ , ArH), 2.61 (3H, s,  $CH_3$ ), 1.36 (12H, s,  $CH_3$ ) ppm;  $\delta_C$  (100 MHz,  $CDCl_3$ ) 198.47 (C), 138.99 (C), 134.92 (CH), 127.28 (CH), 84.21 (C), 26.76 ( $CH_3$ ), 24.87 ( $CH_3$ ) ppm;  $m/z$  (ES-API+) 269.1 ( $M^+ + 23$ , 100%). Data matched that reported.

$^1\text{H}$  NMR (400 MHz,  $\text{CDCl}_3$ )

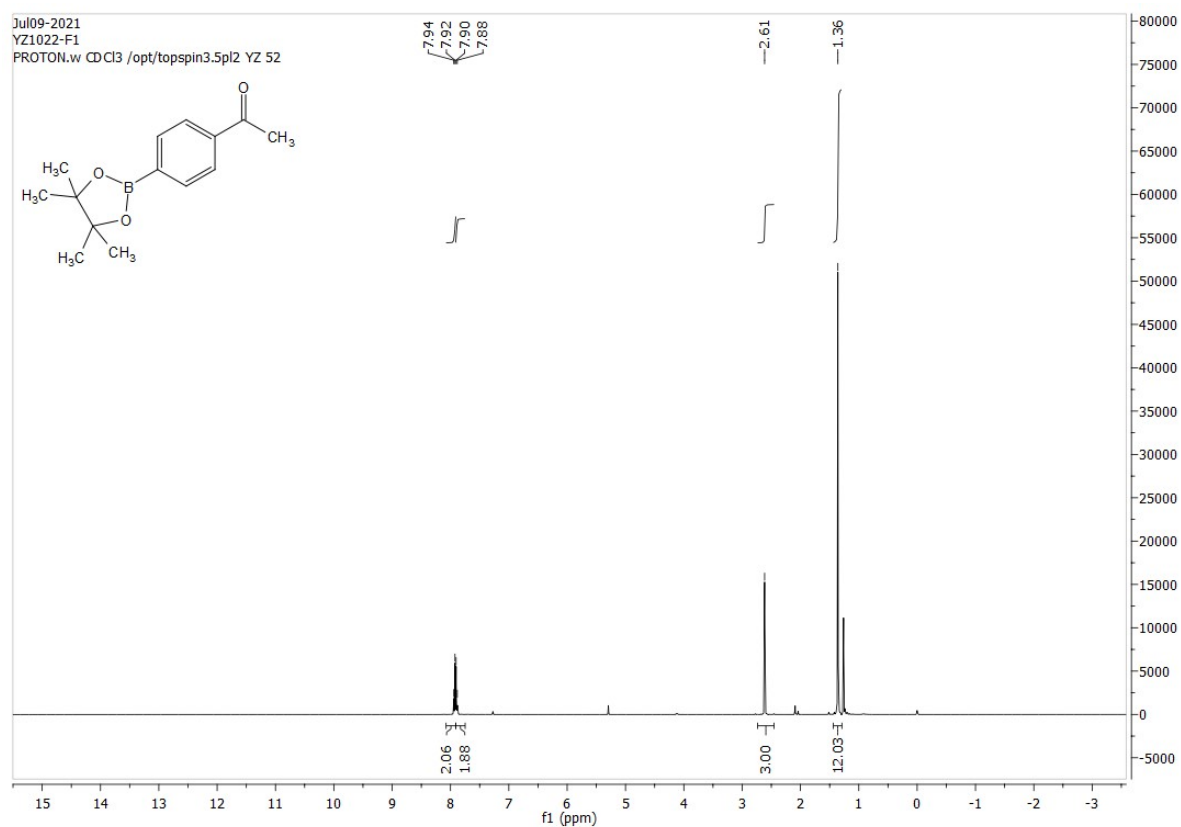

$^{13}\text{C}$  NMR (100 MHz,  $\text{CDCl}_3$ )

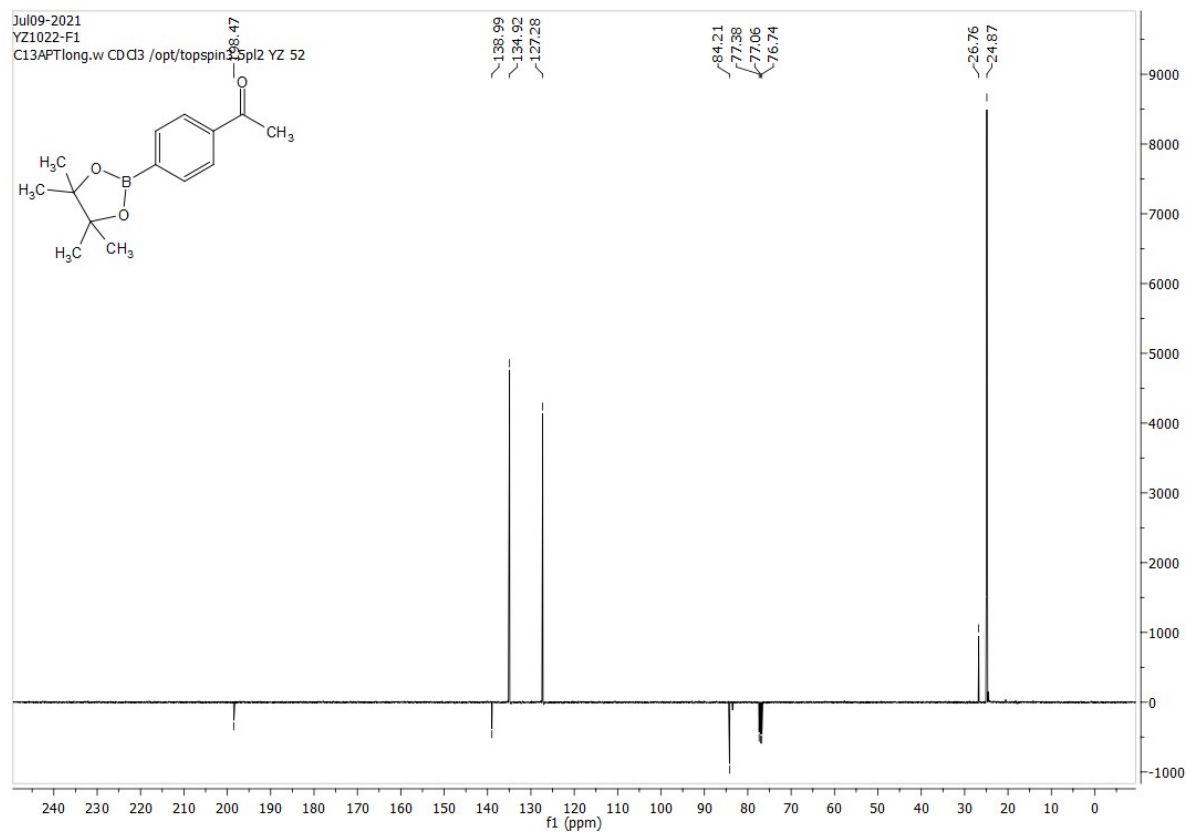



# HPLC of 1-(4-(4,4,5,5-Tetramethyl-1,3,2-dioxaborolan-2-yl)phenyl)ethan-1-one

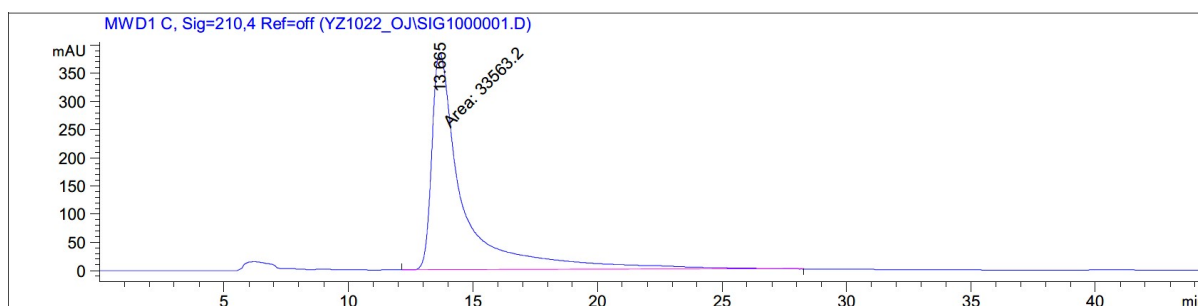

Signal 2: MWD1 C, Sig=210,4 Ref=off

| Peak # | RetTime [min] | Type | Width [min] | Area [mAU*s] | Height [mAU] | Area %   |
|--------|---------------|------|-------------|--------------|--------------|----------|
| 1      | 13.665        | MM   | 1.4529      | 3.35632e4    | 385.01184    | 100.0000 |

Totals : 3.35632e4 385.01184

Racemic and (*R*)-1-(4-(4,4,5,5-Tetramethyl-1,3,2-dioxaborolan-2-yl)phenyl)ethan-1-ol **7**.

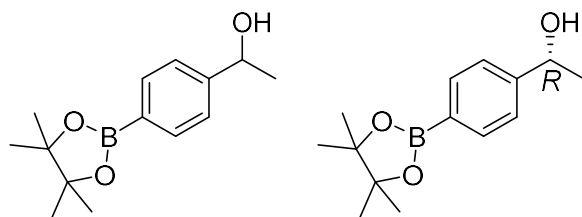

Racemic was formed by use of combined ATH catalysts:

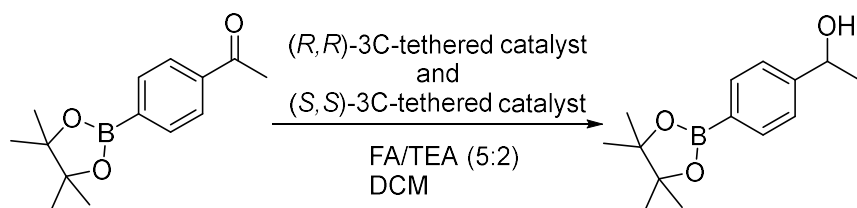

Asymmetric:

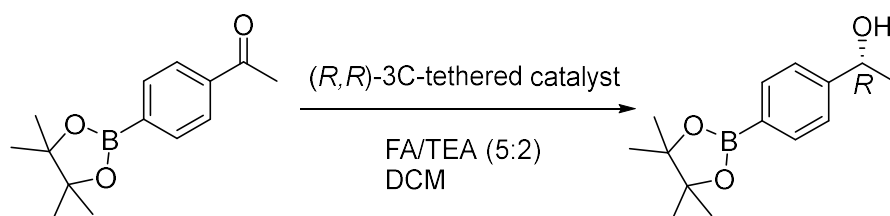

This compound has been reported and fully characterized: L. H. Andrade and T. Barcello, *Org. Lett.* 2009, **11**, 3052-3055.

#### Synthesis of racemic standard:

(*R,R*)-3C-Tethered Ru(II)-TsDPEN catalyst **2** (1.4 mg, 2.2  $\mu$ mol, 0.5 mol%) and (*S,S*)-3C-tethered Ru(II)-TsDPEN catalyst **2** (1.4 mg, 2.2  $\mu$ mol, 0.5 mol%) were added to FA: TEA (5:2 azeotropic mixture, 0.50 mL) at rt and the mixture was stirred under a nitrogen atmosphere for 15 minutes; after which a solution of 1-(4-(4,4,5,5-tetramethyl-1,3,2-dioxaborolan-2-yl)phenyl)ethan-1-one **6** (110 mg, 0.447 mmol) in DCM (0.70 mL) was added. The reaction mixture was stirred under a nitrogen atmosphere and followed by TLC (4:1 hexane: EtOAc). After 24 hours, the reaction was quenched using saturated NaHCO<sub>3</sub> solution (20 mL). EtOAc (20 mL) was added and the organic layer was separated. The aqueous layer was extracted with EtOAc (3 x 20 mL) and the combined organic layers were dried (MgSO<sub>4</sub>) and filtered. The solvent was removed to give the crude product. The product was isolated via flash chromatography on silica eluted with 0-50% EtOAc in hexane to give 1-(4-(4,4,5,5-tetramethyl-1,3,2-dioxaborolan-2-yl)phenyl)ethan-1-ol **7** as a white solid (95.0 mg, 0.383 mmol, 86%). TLC: R<sub>f</sub> ca 0.20 (4:1 hexane: EtOAc), strong UV and KMnO<sub>4</sub>;  $\delta_{\text{H}}$  (400 MHz, CDCl<sub>3</sub>) 7.81 (2H, d, *J* = 7.9, ArH), 7.39 (2H, d, *J* = 7.9, ArH), 4.94-4.78

(1H, m, CH), 1.91 (1H, d,  $J = 3.6$ , OH), 1.49 (3H, d,  $J = 6.5$ , CH<sub>3</sub>), 1.34 (12H, s, CH<sub>3</sub>) ppm;  $\delta_C$  (100 MHz, CDCl<sub>3</sub>) 148.99 (C), 135.06 (CH), 124.67 (CH), 83.79 (C), 70.42 (CH), 25.20 (CH<sub>3</sub>), 24.86 (CH<sub>3</sub>) ppm;  $m/z$  (ES-API+) 271.1 ( $M^+ + 23$ , 100%). Data matched that reported. Enantiomeric excess and conversion determined by HPLC analysis (Chiralcel OJ, 30 cm x 6 mm column, hexane:iPrOH 95:5, 0.5 mL/min,  $T = 25^\circ\text{C}$ ) ketone 13.7 min, *R* isomer 17.2 min and *S* isomer 22.3 min.

ATH of 1-(4-(4,4,5,5-tetramethyl-1,3,2-dioxaborolan-2-yl)phenyl)ethan-1-one **6**. (*R,R*)-3C-tethered Ru(II)-TsDPEN catalyst **2** (2.8 mg, 4.5  $\mu\text{mol}$ , 1 mol%) was added to FA: TEA (5:2 azeotropic mixture, 0.50 mL) at rt and the mixture was stirred under a nitrogen atmosphere for 15 minutes; after which a solution of 1-(2-(4,4,5,5-tetramethyl-1,3,2-dioxaborolan-2-yl)phenyl)ethan-1-one **6** (110 mg, 0.447 mmol) in DCM (0.70 mL) was added. The reaction mixture was stirred under a nitrogen atmosphere and followed by TLC (4:1 hexane: EtOAc). After 24 hours, the reaction was quenched using saturated NaHCO<sub>3</sub> solution (20 mL). EtOAc (20 mL) was added and the organic layer was separated. The aqueous layer was extracted with EtOAc (3 x 20 mL) and the combined organic layers were dried (MgSO<sub>4</sub>) and filtered. The solvent was removed to give the crude product. The product was isolated via flash chromatography on silica eluted with 0-50% EtOAc in hexane to give 1-(4-(4,4,5,5-tetramethyl-1,3,2-dioxaborolan-2-yl)phenyl)ethan-1-ol **7** as a white solid (100 mg, 0.403 mmol, 90%). The reaction was also followed by HPLC (Chiralcel OJ, 30 cm x 6mm column, hexane:iPrOH 95:5, 0.5 mL/min,  $T = 25^\circ\text{C}$ ): 100% conversion;  $[\alpha]_D^{26} +34.0$  (c 0.360 in CHCl<sub>3</sub>) 98% ee (*R*) (lit.  $[\alpha]_D^{24} -31.4$  (c 1.0 in CHCl<sub>3</sub>) >99% ee (*S*)) Reference: L. H. Andrade, T. Barcelos; *Org. Lett.* 2009, **11**, 3052-3055. The same column and solvent combination were used in this paper.

$^1\text{H}$  NMR (400 MHz,  $\text{CDCl}_3$ )

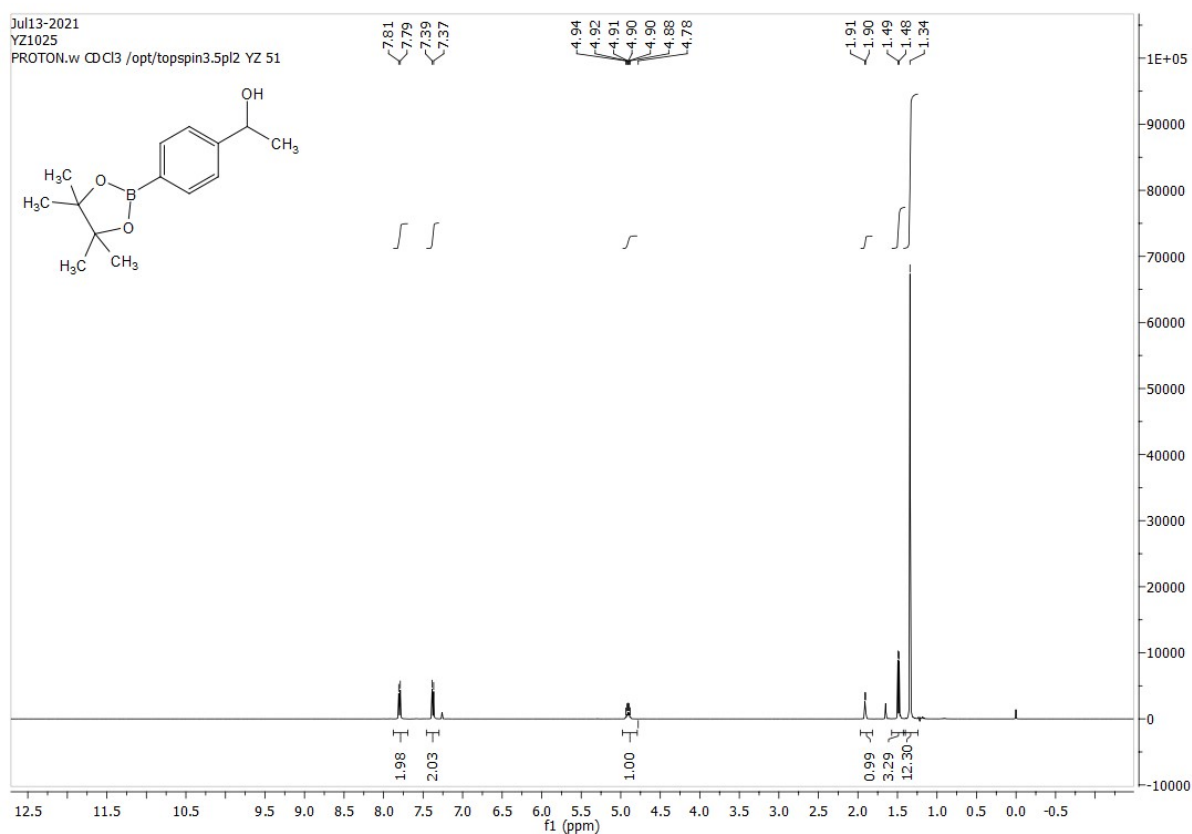

$^{13}\text{C}$  NMR (100 MHz,  $\text{CDCl}_3$ )

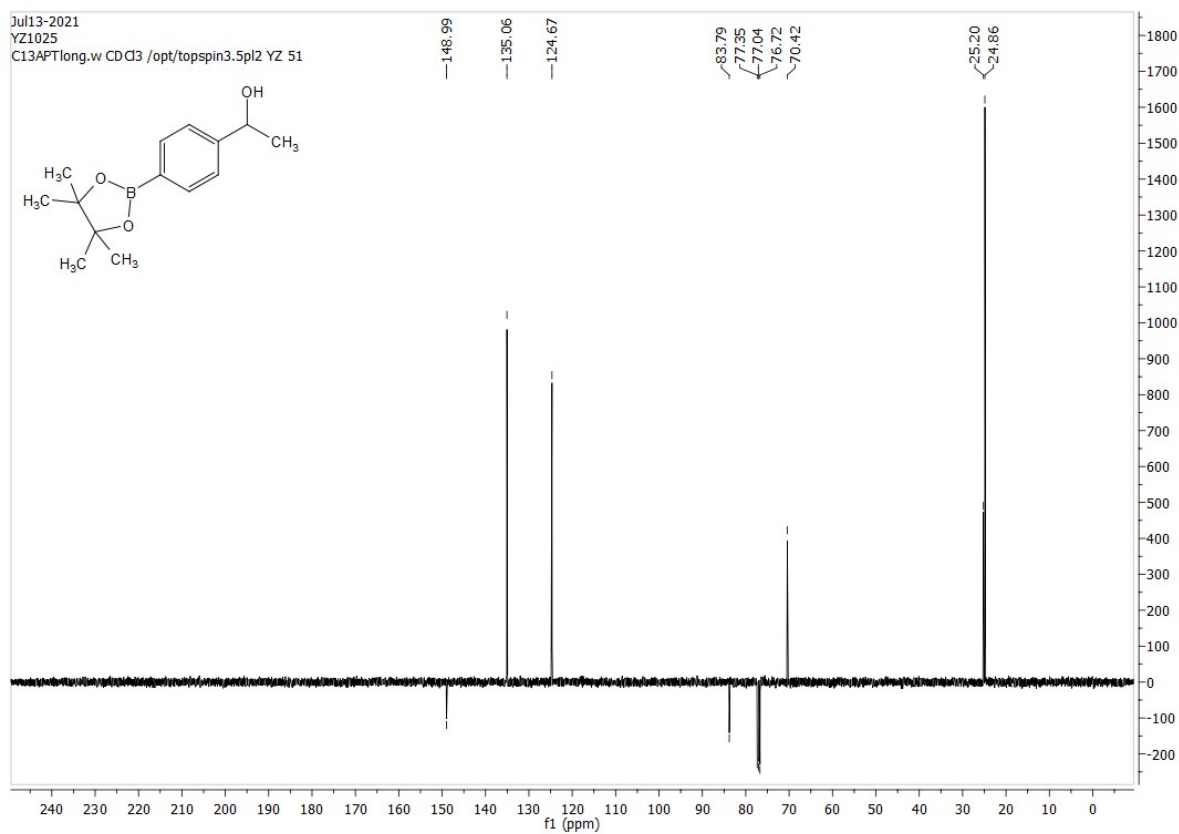

# HPLC of racemic 1-(4-(4,4,5,5-tetramethyl-1,3,2-dioxaborolan-2-yl)phenyl)ethan-1-ol

7

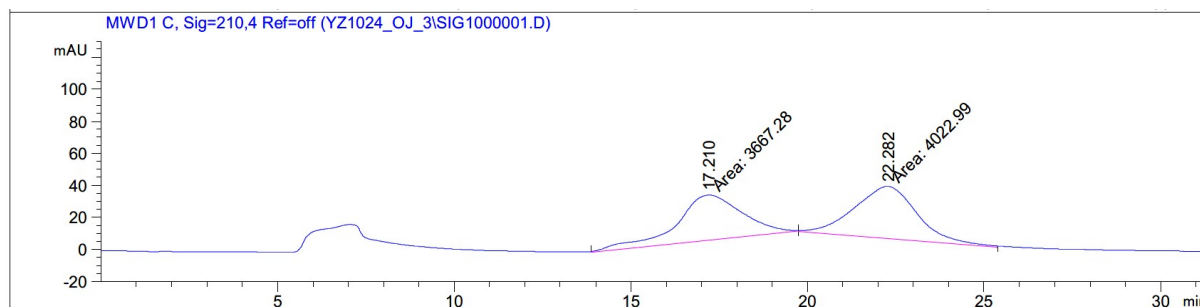

Signal 2: MWD1 C, Sig=210,4 Ref=off

| Peak # | RetTime [min] | Type | Width [min] | Area [mAU*s] | Height [mAU] | Area %  |
|--------|---------------|------|-------------|--------------|--------------|---------|
| 1      | 17.210        | MM   | 2.1733      | 3667.28247   | 28.12326     | 47.6873 |
| 2      | 22.282        | MM   | 2.0609      | 4022.98975   | 32.53387     | 52.3127 |

Totals : 7690.27222 60.65713

## HPLC after ATH of 1-(2-(4,4,5,5-tetramethyl-1,3,2-dioxaborolan-2-yl)phenyl)ethan-1-one 6.

Using (*R,R*)-3C-Tethered Ru(II)-TsDPEN catalyst **2** (DCM as solvent, after 24 hours, white solid, 100 mg, 0.403 mmol, 90% yield, 100% conversion, 98% ee, *R* configuration)

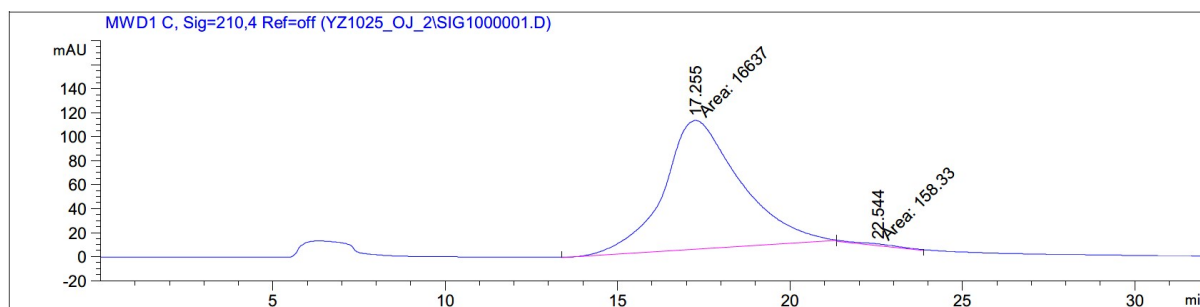

Signal 2: MWD1 C, Sig=210,4 Ref=off

| Peak # | RetTime [min] | Type | Width [min] | Area [mAU*s] | Height [mAU] | Area %  |
|--------|---------------|------|-------------|--------------|--------------|---------|
| 1      | 17.255        | MM   | 2.5820      | 1.66370e4    | 107.38913    | 99.0573 |
| 2      | 22.544        | MM   | 1.5886      | 158.32979    | 1.49962      | 0.9427  |

Totals : 1.67953e4 108.88875

Using (*R,R*)-3C-Tethered Ru(II)-TsDPEN catalyst **2** (neat, after 24 hours, white solid, 58.0 mg, 0.234 mmol, 72% yield, 100% conversion, 98% ee, *R* configuration)

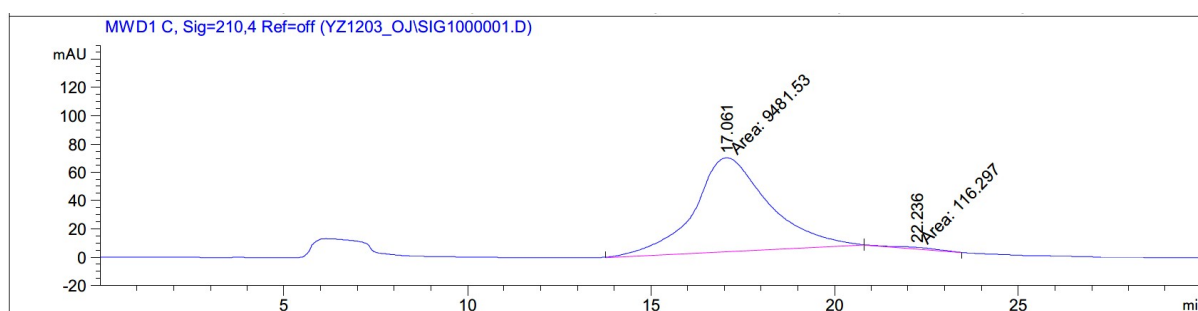

Signal 2: MWD1 C, Sig=210,4 Ref=off

| Peak # | RetTime [min] | Type | Width [min] | Area [mAU*s] | Height [mAU] | Area %  |
|--------|---------------|------|-------------|--------------|--------------|---------|
| 1      | 17.061        | MM   | 2.3736      | 9481.53418   | 66.57746     | 98.7883 |
| 2      | 22.236        | MM   | 1.4365      | 116.29687    | 1.34934      | 1.2117  |

Totals : 9597.83105 67.92680

Using (*R,R*)-3C-Tethered Ru(II)-TsDPEN catalyst **2** (MeOH as solvent, after 24 hours, white solid, 40.0 mg, 0.161 mmol, 50% yield, 100% conversion, 98% ee, *R* configuration)

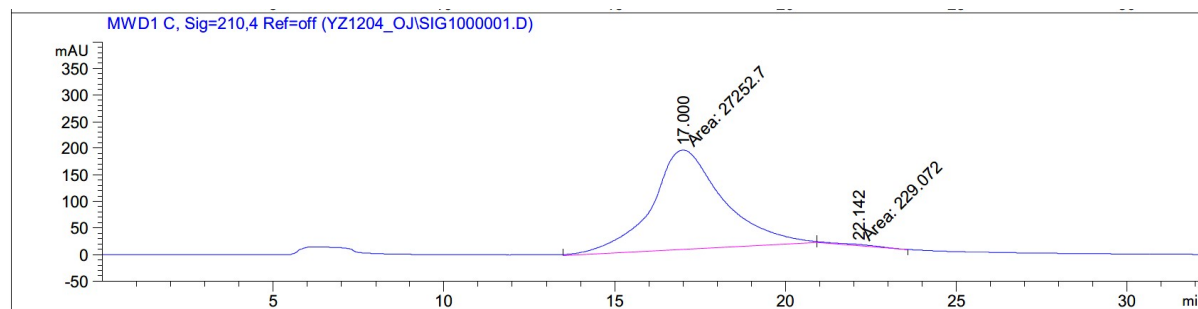

Signal 2: MWD1 C, Sig=210,4 Ref=off

| Peak # | RetTime [min] | Type | Width [min] | Area [mAU*s] | Height [mAU] | Area %  |
|--------|---------------|------|-------------|--------------|--------------|---------|
| 1      | 17.000        | MM   | 2.4354      | 2.72527e4    | 186.50215    | 99.1665 |
| 2      | 22.142        | MM   | 1.4675      | 229.07237    | 2.43233      | 0.8335  |

Totals : 2.74817e4 188.93448

Using (*R,R*)-3C-Tethered Ru(II)-TsDPEN catalyst **2** (MeCN as solvent, after 24 hours, white solid, 47.0 mg, 0.190 mmol, 58% yield, 100% conversion, 98% ee, *R* configuration)

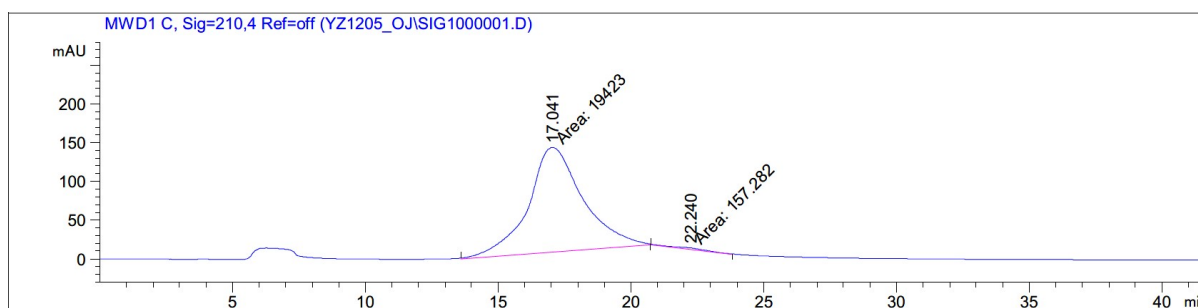

Signal 2: MWD1 C, Sig=210,4 Ref=off

| Peak # | RetTime [min] | Type | Width [min] | Area [mAU*s] | Height [mAU] | Area %  |
|--------|---------------|------|-------------|--------------|--------------|---------|
| 1      | 17.041        | MM   | 2.3940      | 1.94230e4    | 135.21985    | 99.1967 |
| 2      | 22.240        | MM   | 1.4674      | 157.28229    | 1.81303      | 0.8033  |

Totals : 1.95803e4 137.03287

Using pentafluorinated (*R,R*)-Noyori Ru(II)-TsDPEN catalyst **3** (DCM as solvent, after 72 hours, white solid, 42.0 mg, 0.169 mmol, 52% yield, 100% conversion, 98% ee, *R* configuration)

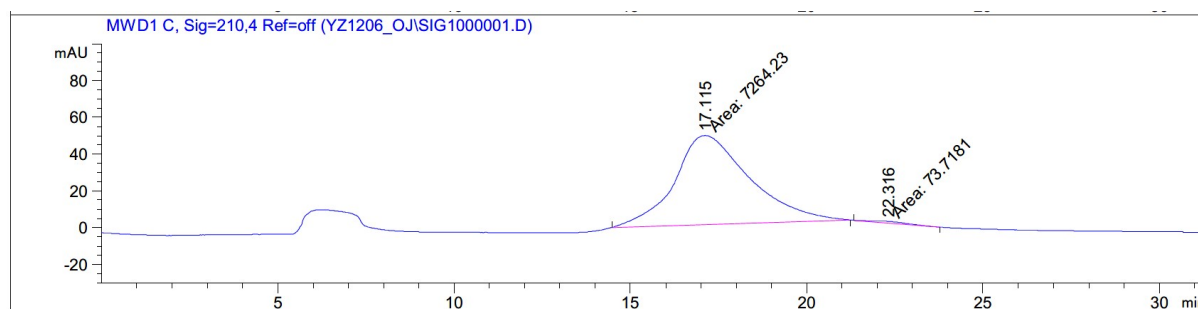



Signal 2: MWD1 C, Sig=210,4 Ref=off

| Peak # | RetTime [min] | Type | Width [min] | Area [mAU*s] | Height [mAU] | Area %  |
|--------|---------------|------|-------------|--------------|--------------|---------|
| 1      | 17.115        | MM   | 2.4918      | 7264.23242   | 48.58672     | 98.9954 |
| 2      | 22.316        | MM   | 1.2543      | 73.71809     | 9.79529e-1   | 1.0046  |

Totals : 7337.95051 49.56625

Using (*R,R*)-Noyori Ru(II)-TsDPEN catalyst **1** (DCM as solvent, after 72 hours, white solid, 45.0 mg, 0.181 mmol, 56% yield, 100% conversion, 98% ee, *R* configuration)

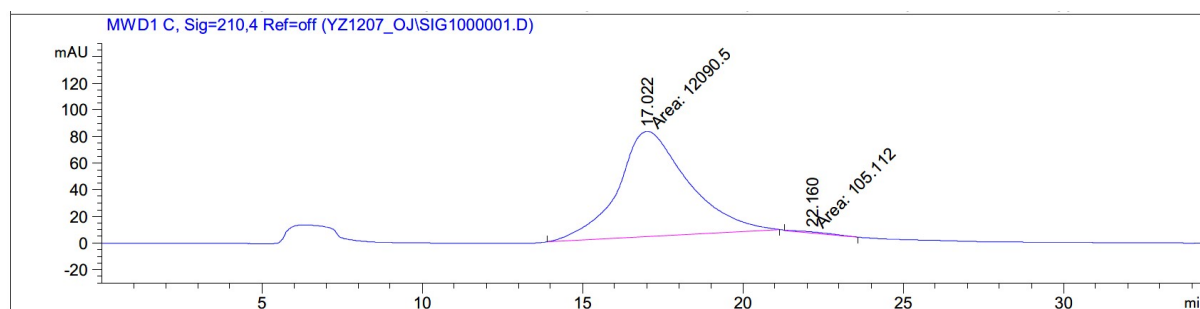

Signal 2: MWD1 C, Sig=210,4 Ref=off

| Peak # | RetTime [min] | Type | Width [min] | Area [mAU*s] | Height [mAU] | Area %  |
|--------|---------------|------|-------------|--------------|--------------|---------|
| 1      | 17.022        | MM   | 2.5472      | 1.20905e4    | 79.11017     | 99.1381 |
| 2      | 22.160        | MM   | 1.5707      | 105.11175    | 1.11534      | 0.8619  |

Totals : 1.21956e4 80.22551

Using (*R,R*)-3C-Tethered, 4-methoxy-Ru(II)-TsDPEN catalyst **4** (use DCM as solvent, after 24 hours, white solid, 43.0 mg, 0.173 mmol, 53% yield, 100% conversion, 98% ee, *R* configuration)

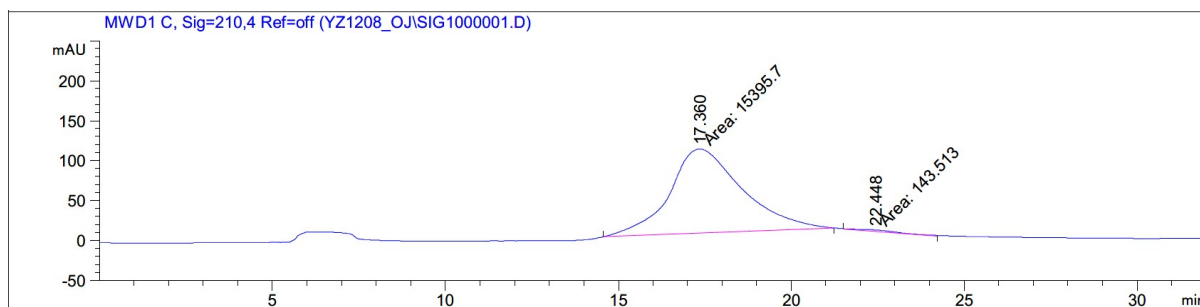



Signal 2: MWD1 C, Sig=210,4 Ref=off

| Peak # | RetTime [min] | Type | Width [min] | Area [mAU*s] | Height [mAU] | Area %  |
|--------|---------------|------|-------------|--------------|--------------|---------|
| 1      | 17.360        | MM   | 2.4403      | 1.53957e4    | 105.14993    | 99.0764 |
| 2      | 22.448        | MM   | 1.2331      | 143.51328    | 1.93978      | 0.9236  |

Totals : 1.55392e4 107.08972

Using (*R,R*)-benzyl-tethered Ru(II)-TsDPEN catalyst **5** (DCM as solvent, after 24 hours, white solid, 43.0 mg, 0.173 mmol, 53% yield, 100% conversion, 97% ee, *R* configuration).

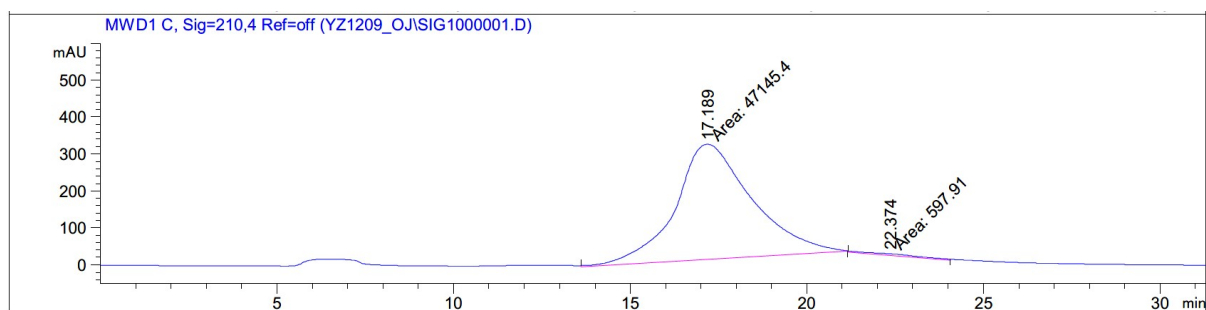

Signal 2: MWD1 C, Sig=210,4 Ref=off

| Peak # | RetTime [min] | Type | Width [min] | Area [mAU*s] | Height [mAU] | Area %  |
|--------|---------------|------|-------------|--------------|--------------|---------|
| 1      | 17.189        | MM   | 2.5194      | 4.71454e4    | 311.88705    | 98.7477 |
| 2      | 22.374        | MM T | 2.0992      | 597.91016    | 4.74706      | 1.2523  |

Totals : 4.77433e4 316.63411

Racemic and (*R*)-1-([1,1'-Biphenyl]-4-yl)ethan-1-ol **8**.

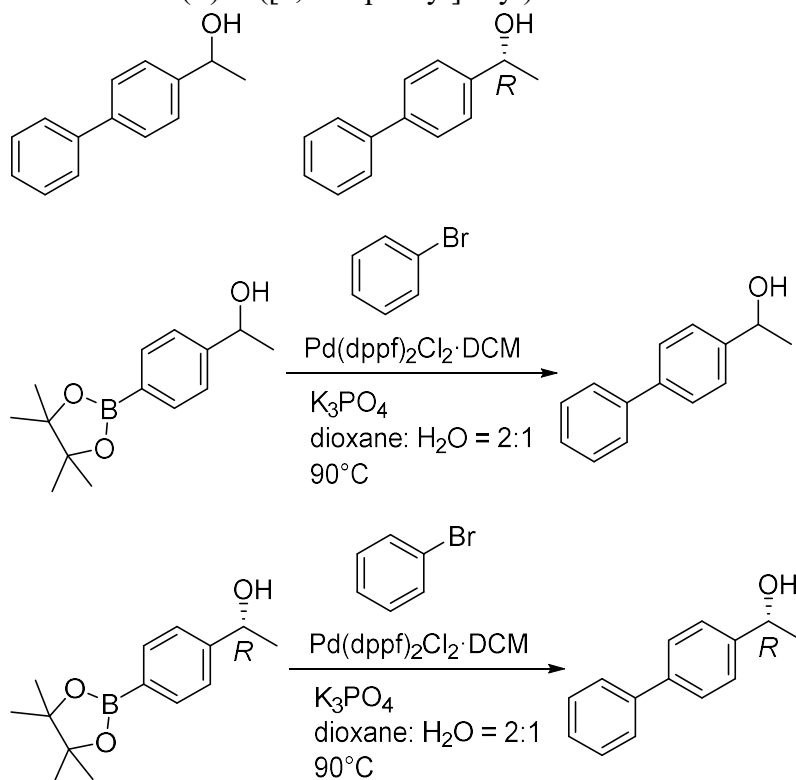

This compound has been reported and fully characterized: L. H. Andrade, T. Barcellos, *Org. Lett.* 2009, **11**, 3052-3055.

Racemic.

To a solution of racemic 1-(4-(4,4,5,5-tetramethyl-1,3,2-dioxaborolan-2-yl)phenyl)ethan-1-ol (190 mg, 0.766 mmol), bromobenzene (181 mg, 1.15 mmol) and tripotassium phosphate (488 mg, 2.30 mmol) in dioxane (3.8 mL) and distilled water (1.9 mL) was added  $\text{Pd(dppf)}_2\text{Cl}_2 \cdot \text{DCM}$  (31.3 mg, 0.0383 mmol). The reaction mixture was heated to  $90^\circ\text{C}$  and left stirring under the nitrogen atmosphere overnight, followed by TLC (9:1 hexane: EtOAc). The mixture was quenched by distilled water (20 mL). EtOAc (20 mL) was added and the organic layer was separated. The aqueous layer was extracted with EtOAc ( $3 \times 20$  mL), and the combined organic layers were dried ( $\text{MgSO}_4$ ) and filtered. Solvent was removed to give the crude product. The product was isolated via flash chromatography on silica eluted with 0-20% ethyl acetate in hexane to give racemic 1-([1,1'-biphenyl]-4-yl)ethan-1-ol **8** as a white solid (72.0 mg, 0.364 mmol, 47%). TLC:  $R_f$  ca 0.20 (9:1 hexane: EtOAc), strong UV and  $\text{KMnO}_4$ ;  $\delta_{\text{H}}$  (400 MHz,  $\text{CDCl}_3$ ) 7.60-7.58 (4H, m, ArH), 7.47-7.43 (4H, m, ArH), 7.34 (1H, t,  $J = 7.3$ , ArH), 4.98-4.92 (1H, m, ArCH), 1.89 (1H, d,  $J = 3.4$ , OH), 1.54 (3H,

d,  $J = 6.5$ , CH<sub>3</sub>) ppm;  $\delta_C$  (100 MHz, CDCl<sub>3</sub>) 144.83 (C), 140.88 (C), 140.49 (C), 128.79 (CH), 127.29 (CH), 127.11 (CH), 125.88 (CH), 70.20 (CH), 25.17 (CH<sub>3</sub>) ppm;  $m/z$  (ES-API<sup>+</sup>) 221.0 ( $M^+ + 23$ , 100%). Data matched that reported.

Enantiomeric excess and conversion determined by HPLC analysis (Chiralcel ADH, 30 cm x 6mm column, hexane:iPrOH 95:5, 0.5 mL/min,  $T = 25^\circ\text{C}$ ) *S* isomer 23.0 min and *R* isomer 25.1 min.

Asymmetric.

To a solution of (*R*)-1-(4-(4,4,5,5-tetramethyl-1,3,2-dioxaborolan-2-yl)phenyl)ethan-1-ol (156 mg, 0.629 mmol), bromobenzene (148 mg, 0.944 mmol) and tripotassium phosphate (401 mg, 1.89 mmol) in dioxane (3.1 mL) and distilled water (1.6 mL) was added Pd(dppf)<sub>2</sub>Cl<sub>2</sub>·DCM (25.8 mg, 0.0315 mmol). The reaction mixture was heated to 90 °C and left stirring under the nitrogen atmosphere overnight, followed by TLC (9:1 hexane: EtOAc). The mixture was quenched by distilled water (20 mL). EtOAc (20 mL) was added and the organic layer was separated. The aqueous layer was extracted with EtOAc (3 × 20 mL), and the combined organic layers were dried (MgSO<sub>4</sub>) and filtered. Solvent was removed to give the crude product. The product was isolated via flash chromatography on silica eluted with 0-20% ethyl acetate in hexane to give (*R*)-1-([1,1'-biphenyl]-4-yl)ethan-1-ol **8** as a white solid (60.0 mg, 0.306 mmol, 49%). The reaction was also followed by HPLC (Chiralpak ADH, 30 cm x 6mm column, hexane:iPrOH 95:5, 0.5 mL/min,  $T = 25^\circ\text{C}$ ):  $[\alpha]_D^{31} +35.2$  (c 0.740 in CHCl<sub>3</sub>) 96% ee (*R*) (lit.  $[\alpha]_D^{24} -46.6$  (c 1.0 in CHCl<sub>3</sub>) 96% ee (*S*)) Reference: L. H. Andrade, T. Barcelos; *Org. Lett.* 2009, **11**, 3052-3055.

$^1\text{H}$  NMR (400 MHz,  $\text{CDCl}_3$ )

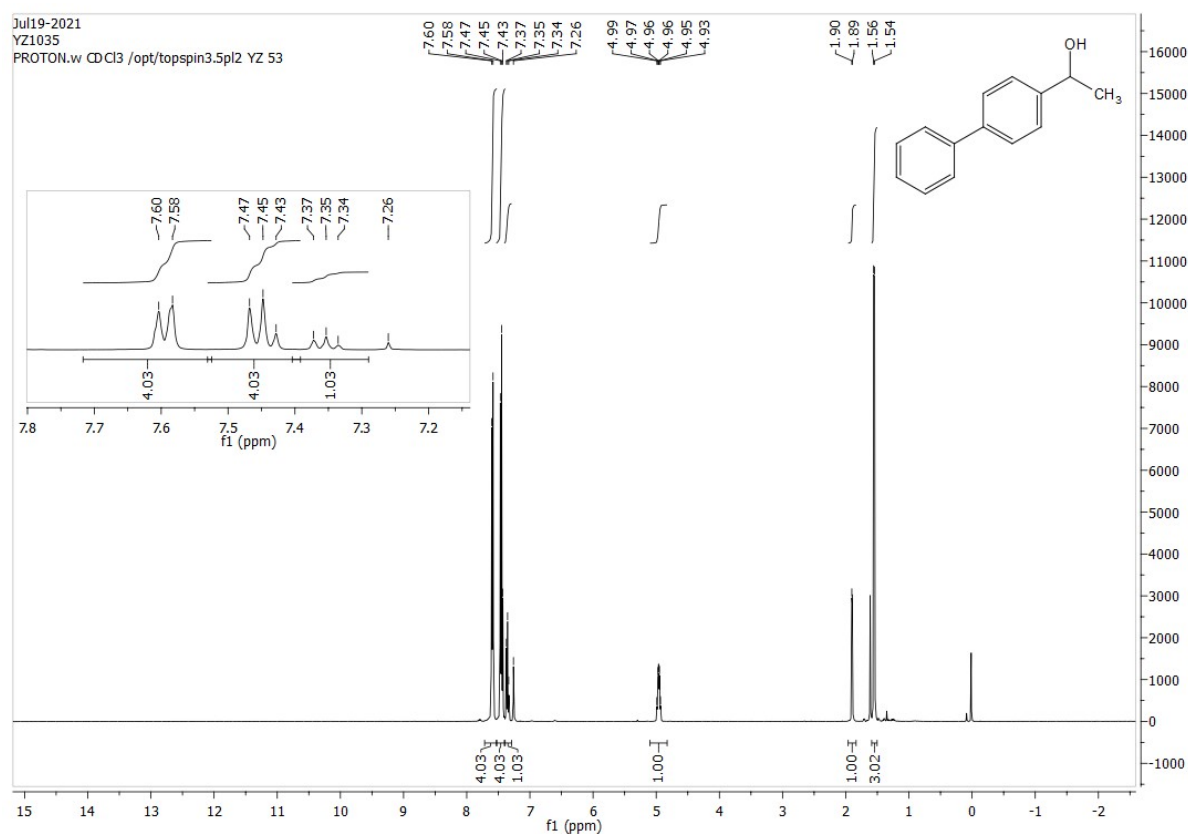

$^{13}\text{C}$  NMR (100 MHz,  $\text{CDCl}_3$ )

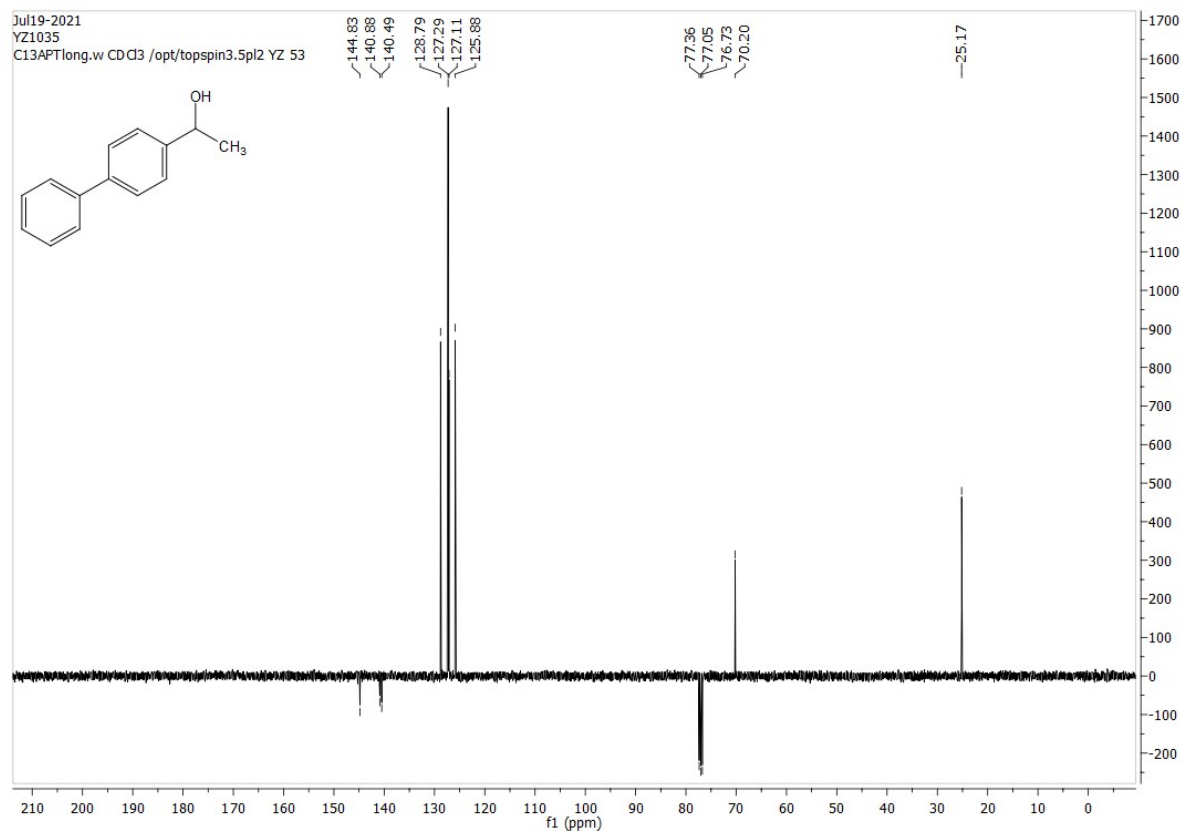

# HPLC of racemic 1-([1,1'-biphenyl]-4-yl)ethan-1-ol **8**.

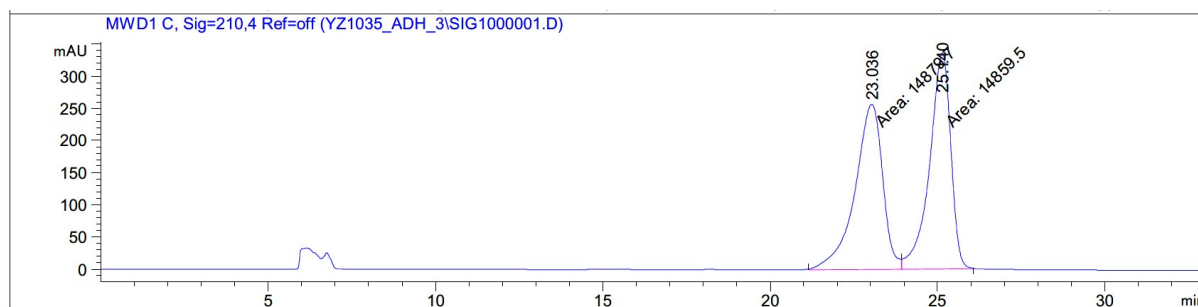

Signal 2: MWD1 C, Sig=210,4 Ref=off

| Peak # | RetTime [min] | Type | Width [min] | Area [mAU*s] | Height [mAU] | Area %  |
|--------|---------------|------|-------------|--------------|--------------|---------|
| 1      | 23.036        | MF   | 0.9651      | 1.48797e4    | 256.96442    | 50.0339 |
| 2      | 25.140        | FM   | 0.7374      | 1.48595e4    | 335.83981    | 49.9661 |

Totals : 2.97392e4 592.80423

## HPLC of 1-([1,1'-biphenyl]-4-yl)ethan-1-ol **8**. (96% ee, *R* configuration)

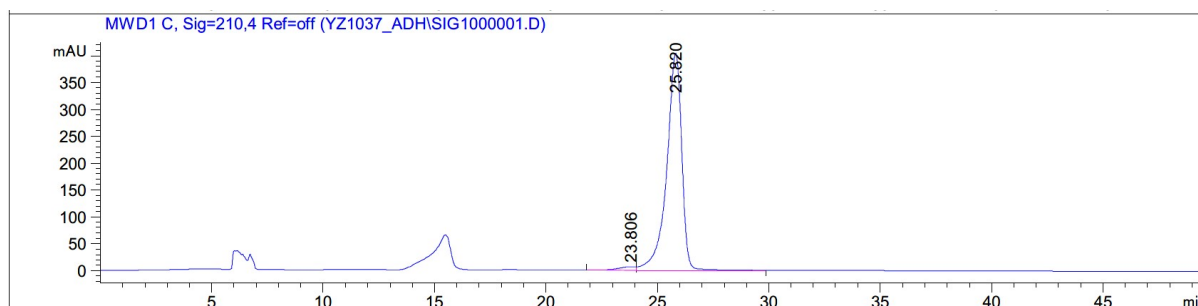

Signal 2: MWD1 C, Sig=210,4 Ref=off

| Peak # | RetTime [min] | Type | Width [min] | Area [mAU*s] | Height [mAU] | Area %  |
|--------|---------------|------|-------------|--------------|--------------|---------|
| 1      | 23.806        | BV   | 0.6397      | 343.31085    | 6.46352      | 1.7795  |
| 2      | 25.820        | VB   | 0.7059      | 1.89497e4    | 403.49734    | 98.2205 |

Totals : 1.92930e4 409.96086

#### Data related to Figure 4.

1-(3-(4,4,5,5-Tetramethyl-1,3,2-dioxaborolan-2-yl)phenyl)ethan-1-one.

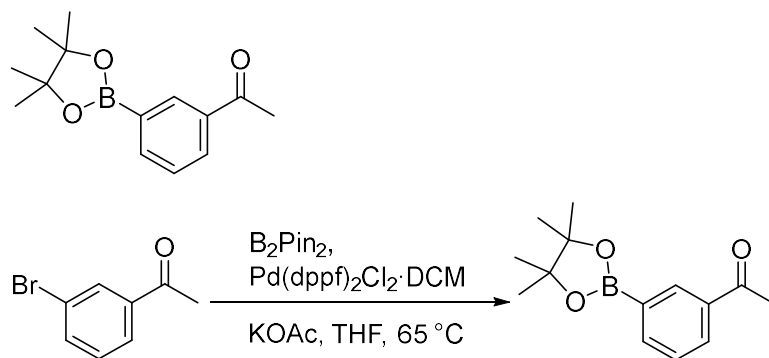

This compound has been reported and fully characterized.

Reference: X. Zhao, M. Wu, Y. Liu and S. Cao, *Org. Lett.* 2018, **20**, 5564-5568.

A round-bottom flask was charged with 3'-bromoacetophenone (398 mg, 2.00 mmol), bis(pinacolato)diboron (610 mg, 2.40 mmol), potassium acetate (588 mg, 6.00 mmol), THF (12 mL) and  $Pd(dppf)_2Cl_2 \cdot DCM$  (81.7 mg, 0.100 mmol). The reaction mixture was heated to 65 °C and left stirring under the nitrogen atmosphere overnight, followed by TLC (9:1 hexane: EtOAc). The mixture was quenched by distilled water (20 mL). EtOAc (20 mL) was added and the organic layer was separated. The aqueous layer was extracted with EtOAc (3 × 20 mL), and the combined organic layers were dried ( $MgSO_4$ ) and filtered. Solvent was removed to give the crude product. The product was isolated via flash chromatography on silica eluted with 0-50% ethyl acetate in hexane to give 1-(3-(4,4,5,5-tetramethyl-1,3,2-dioxaborolan-2-yl)phenyl)ethan-1-one as a colorless oil (362 mg, 1.47 mmol, 74%). TLC:  $R_f$  ca 0.30 (9:1 hexane: EtOAc), strong UV and  $KMnO_4$ ;  $\delta_H$  (400 MHz,  $CDCl_3$ ) 8.35 (1H, s, ArH), 8.06 (1H, d,  $J = 7.3$ , ArH), 7.99 (1H, d,  $J = 7.3$ , ArH), 7.46 (1H, t,  $J = 7.6$ , ArH), 2.63 (3H, s,  $CH_3$ ), 1.35 (12H, s,  $CH_3$ ) ppm;  $\delta_C$  (100 MHz,  $CDCl_3$ ) 198.40 (C), 139.41 (CH), 136.52 (C), 134.81 (CH), 130.77 (CH), 128.05 (CH), 84.15 (C), 26.75 ( $CH_3$ ), 24.88 ( $CH_3$ ) ppm;  $m/z$  (ES-API+) 269.1 ( $M^+ + 23$ , 100%). Data matched that reported.

$^1\text{H}$  NMR (400 MHz,  $\text{CDCl}_3$ )

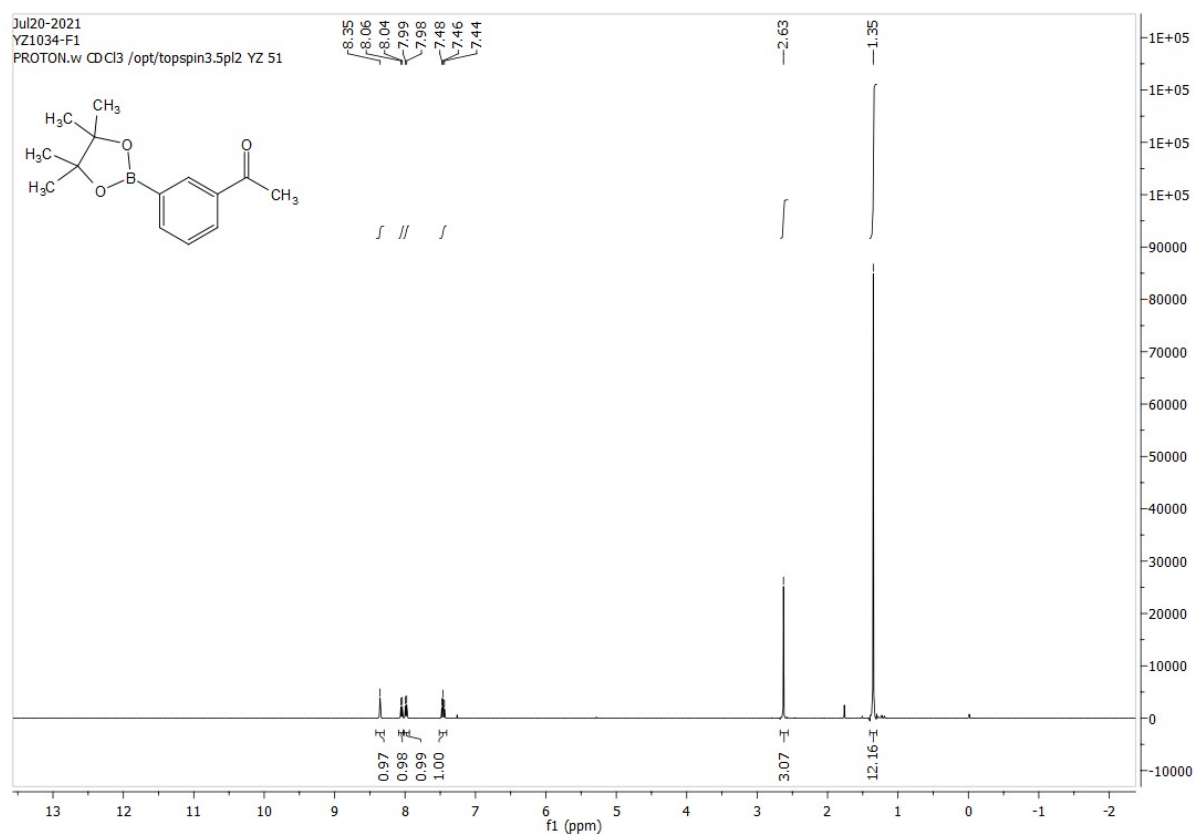

$^{13}\text{C}$  NMR (100 MHz,  $\text{CDCl}_3$ )

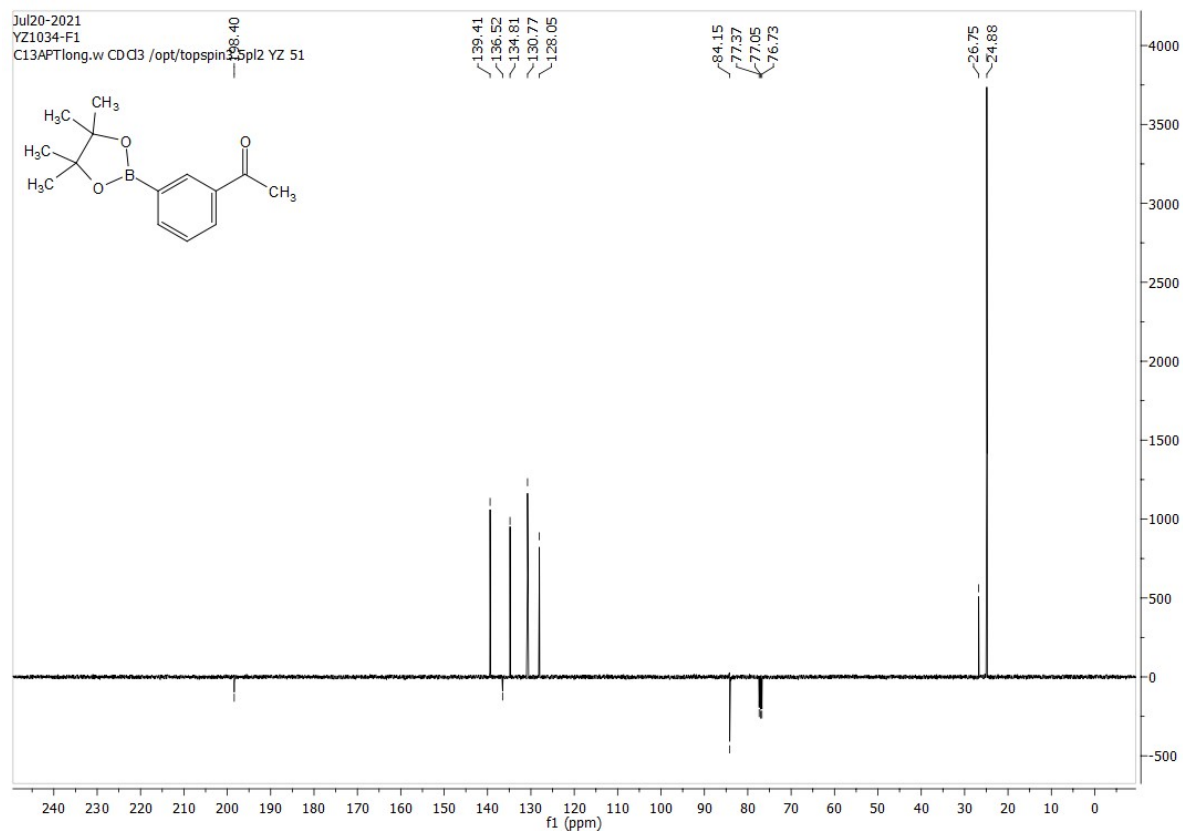

# HPLC of 1-(3-(4,4,5,5-tetramethyl-1,3,2-dioxaborolan-2-yl)phenyl)ethan-1-one

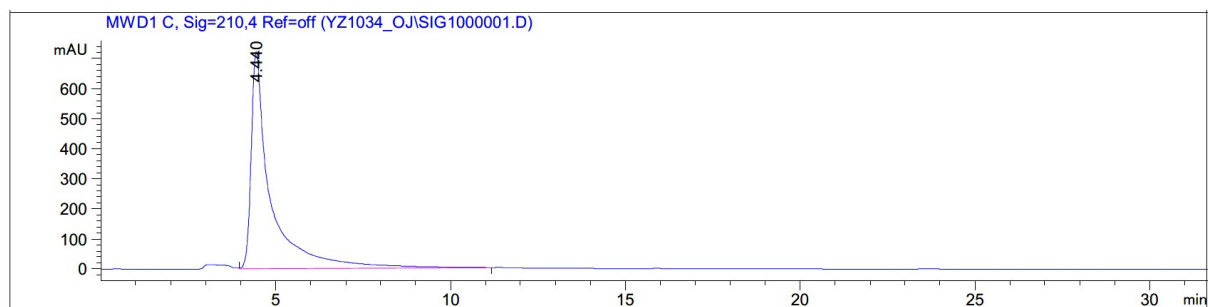

Signal 2: MWD1 C, Sig=210,4 Ref=off

| Peak # | RetTime [min] | Type | Width [min] | Area [mAU*s] | Height [mAU] | Area %   |
|--------|---------------|------|-------------|--------------|--------------|----------|
| 1      | 4.440         | VB   | 0.5296      | 2.81960e4    | 721.96869    | 100.0000 |

Totals : 2.81960e4 721.96869



Racemic and (*R*)-1-(3-(4,4,5,5-Tetramethyl-1,3,2-dioxaborolan-2-yl)phenyl)ethan-1-ol  
**9.**

racemic:

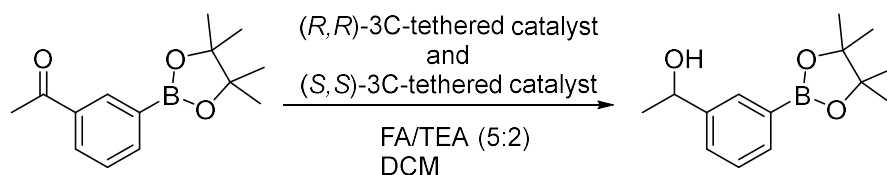

Asymmetric:

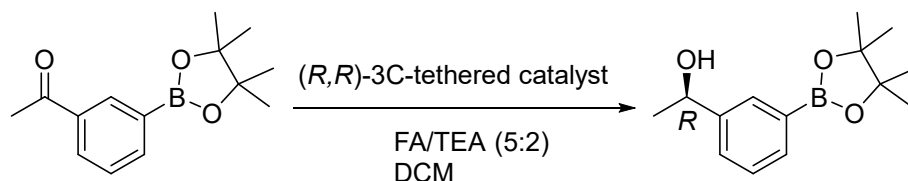

This compound has been reported and fully characterized.

Reference: L. H. Andrade, T. Barcelos; *Org. Lett.* 2009, **11**, 3052-3055.

**Synthesis of a racemic standard:**

(*R,R*)-3C-Tethered Ru(II)-TsDPEN catalyst **2** (2.3 mg, 3.7  $\mu$ mol, 0.5 mol%) and (*S,S*)-3C-tethered Ru(II)-TsDPEN catalyst **2** (2.3 mg, 3.7  $\mu$ mol, 0.5 mol%) were added to FA: TEA (5:2 azeotropic mixture, 0.81 mL) at rt and the mixture was stirred under a nitrogen atmosphere for 15 minutes; after which a solution of 1-(3-(4,4,5,5-tetramethyl-1,3,2-dioxaborolan-2-yl)phenyl)ethan-1-one (180 mg, 0.732 mmol) in DCM (1.13 mL) was added. The reaction mixture was stirred under a nitrogen atmosphere and followed by TLC (4:1 hexane: EtOAc). After 24 hours, the reaction was quenched using saturated NaHCO<sub>3</sub> solution (20 mL). EtOAc (20 mL) was added and the organic layer was separated. The aqueous layer was extracted with EtOAc (3 x 20 mL) and the combined organic layers were dried (MgSO<sub>4</sub>) and filtered. The solvent was removed to give the crude product. The product was isolated via flash chromatography on silica eluted with 0-50% EtOAc in hexane to give 1-(3-(4,4,5,5-tetramethyl-1,3,2-dioxaborolan-2-yl)phenyl)ethan-1-ol **9** as a colorless oil (110 mg, 0.444 mmol, 61%). TLC: R<sub>f</sub> ca 0.20 (4:1 hexane: EtOAc), strong UV and KMnO<sub>4</sub>;  $\delta_{\text{H}}$  (400 MHz, CDCl<sub>3</sub>) 7.79 (1H, s, ArH), 7.73 (1H, d, *J* = 7.2, ArH), 7.51 (1H, d, *J* = 7.6, ArH), 7.37 (1H, t, *J* = 7.5, ArH), 4.94-4.89 (1H, m, CH), 1.88 (1H, d, *J* = 3.0, OH), 1.51 (3H, d, *J* = 6.4, CH<sub>3</sub>), 1.35 (12H, s, CH<sub>3</sub>) ppm;  $\delta_{\text{C}}$  (100 MHz, CDCl<sub>3</sub>) 145.07 (C), 133.99 (CH), 131.74 (CH), 128.31 (CH), 128.01 (CH), 83.86 (C), 70.48 (CH), 25.14

(CH<sub>3</sub>), 24.88 (CH<sub>3</sub>) ppm; m/z (ES-API+) 271.1 (M<sup>+</sup> + 23, 100%). Data matched that reported.

Enantiomeric excess and conversion determined by HPLC analysis (Chiralcel OJ, 30 cm x 6mm column, hexane:iPrOH 95:5, 1.0 mL/min, T = 25°C) ketone 4.4 min, *R* isomer 21.9 min and *S* isomer 7.2 min. The same column and conditions were used as in the paper referenced above.

ATH of 1-(3-(4,4,5,5-tetramethyl-1,3,2-dioxaborolan-2-yl)phenyl)ethan-1-one using (*R,R*)-3C-tethered Ru(II)-TsDPEN catalyst **2** (4.5 mg, 7.3 μmol, 1 mol%) was added to FA: TEA (5:2 azeotropic mixture, 0.81 mL) at rt and the mixture was stirred under a nitrogen atmosphere for 15 minutes; after which a solution of 1-(3-(4,4,5,5-tetramethyl-1,3,2-dioxaborolan-2-yl)phenyl)ethan-1-one (180 mg, 0.732 mmol) in DCM (1.13 mL) was added. The reaction mixture was stirred under a nitrogen atmosphere and followed by TLC (4:1 hexane: EtOAc). After 24 hours, the reaction was quenched using saturated NaHCO<sub>3</sub> solution (20 mL). EtOAc (20 mL) was added and the organic layer was separated. The aqueous layer was extracted with EtOAc (3 x 20 mL) and the combined organic layers were dried (MgSO<sub>4</sub>) and filtered. The solvent was removed to give the crude product. The product was isolated via flash chromatography on silica eluted with 0-50% EtOAc in hexane to give (*R*)-1-(3-(4,4,5,5-tetramethyl-1,3,2-dioxaborolan-2-yl)phenyl)ethan-1-ol **9** as a colourless oil (111 mg, 0.448 mmol, 61%). The reaction was also followed by HPLC (Chiralcel OJ, 30 cm x 6 mm column, hexane:iPrOH 95:5, 1.0 mL/min, T = 25°C): [α]<sub>D</sub><sup>31</sup> +31.9 (c 0.808 in CHCl<sub>3</sub>) 98% ee (*R*) (lit. [α]<sub>D</sub><sup>27</sup> -27.2 (c 1.14 in CHCl<sub>3</sub>) >99% ee (*S*))  
Reference: L. H. Andrade, T. Barcelos; *Org. Lett.* 2009, **11**, 3052-3055.

$^1\text{H}$  NMR (400 MHz,  $\text{CDCl}_3$ )

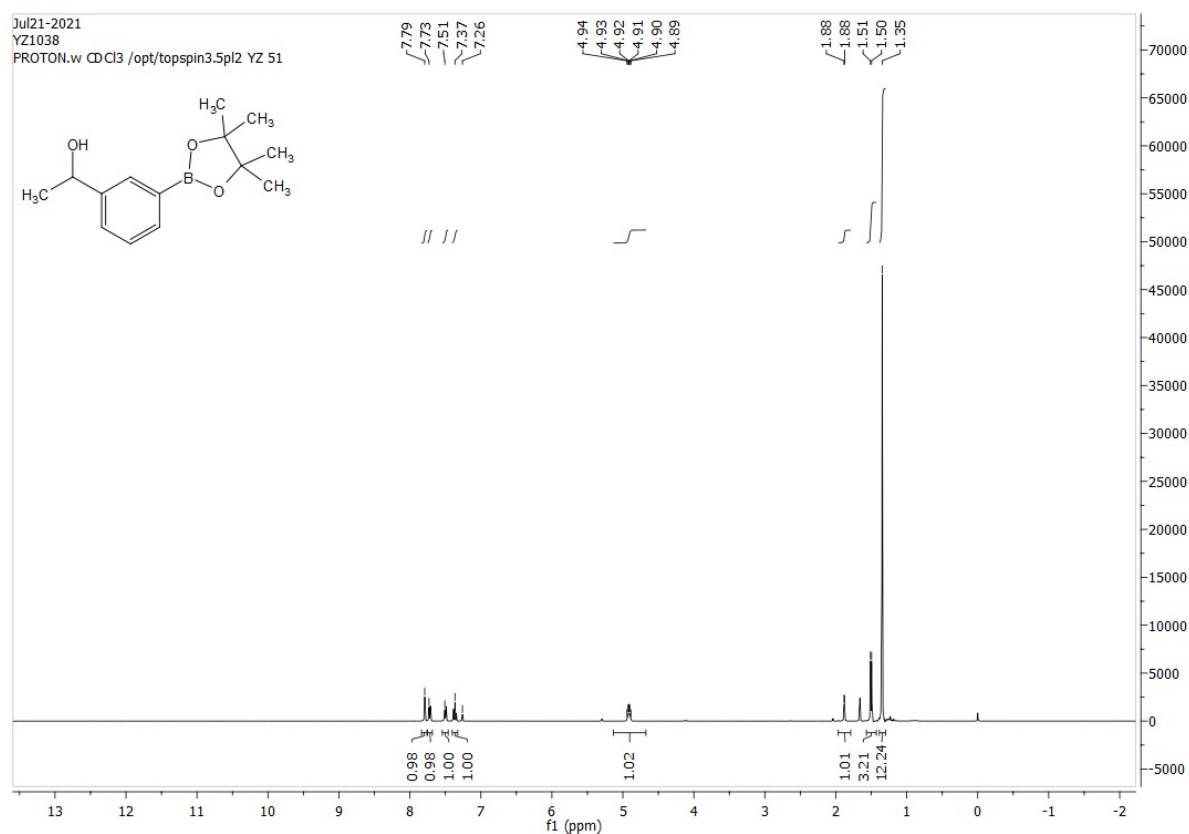

$^{13}\text{C}$  NMR (100 MHz,  $\text{CDCl}_3$ )

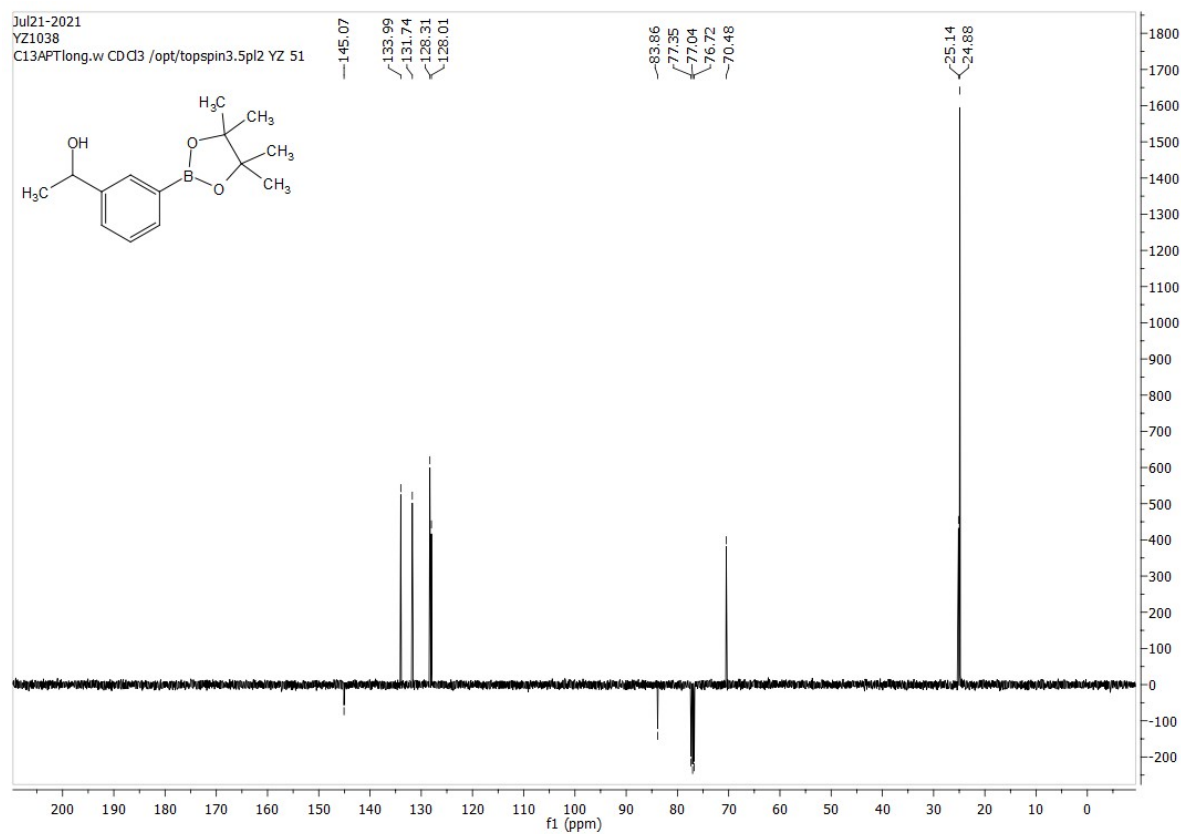

# HPLC of racemic 1-(3-(4,4,5,5-tetramethyl-1,3,2-dioxaborolan-2-yl)phenyl)ethan-1-ol

9

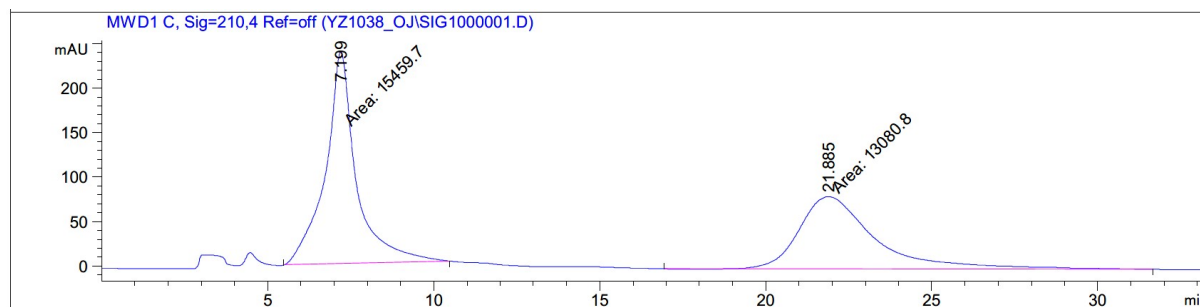

Signal 2: MWD1 C, Sig=210,4 Ref=off

| Peak # | RetTime [min] | Type | Width [min] | Area [mAU*s] | Height [mAU] | Area %  |
|--------|---------------|------|-------------|--------------|--------------|---------|
| 1      | 7.199         | MM   | 1.0811      | 1.54597e4    | 238.32399    | 54.1675 |
| 2      | 21.885        | MM   | 2.6813      | 1.30808e4    | 81.31003     | 45.8325 |

Totals : 2.85405e4 319.63402

HPLC after ATH of 1-(3-(4,4,5,5-tetramethyl-1,3,2-dioxaborolan-2-yl)phenyl)ethan-1-one (*R,R*)-3C-Tethered Ru(II)-TsDPEN catalyst **2** (after 24 hours, 100% conversion, 98% ee, *R* configuration)

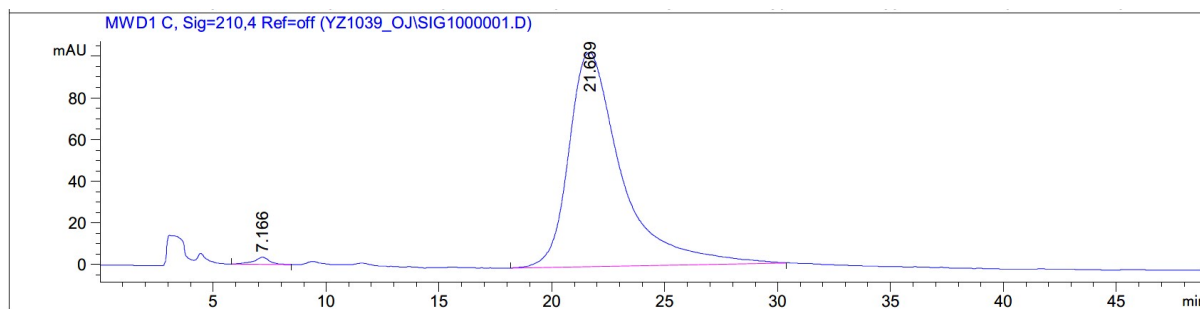

Signal 2: MWD1 C, Sig=210,4 Ref=off

| Peak # | RetTime [min] | Type | Width [min] | Area [mAU*s] | Height [mAU] | Area %  |
|--------|---------------|------|-------------|--------------|--------------|---------|
| 1      | 7.166         | BB   | 0.5901      | 174.96596    | 3.54352      | 1.0387  |
| 2      | 21.669        | BB   | 1.9898      | 1.66704e4    | 102.69458    | 98.9613 |

Totals : 1.68453e4 106.23810

1-(3-Bromophenyl)-2-phenoxyethan-1-one.

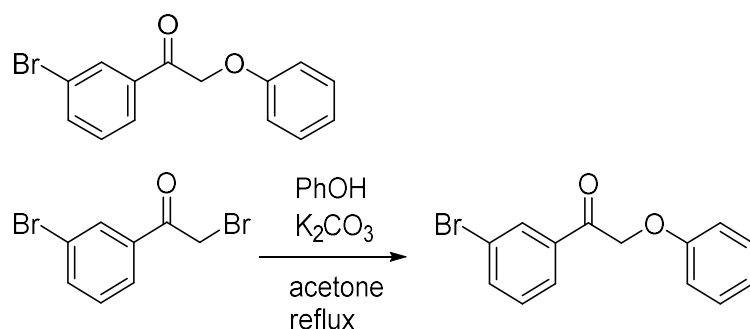

This compound has been reported and fully characterized: K. Huang, M. Ortiz-Marciales, W. Correa, E. Pomales, X. Y. Lopez, *J. Org. Chem.* 2009, **74**, 4195-4202.

A round-bottom flask was charged with 2,3'-dibromoacetophenone (1.39 g, 5.00 mmol), potassium carbonate (690 mg, 5.00 mmol), phenol (470 mg, 5.00 mmol) and acetone (5 mL). The reaction mixture was heated to reflux and left stirring under the nitrogen atmosphere overnight, followed by TLC (9:1 hexane: EtOAc). The mixture was quenched by distilled water (20 mL). EtOAc (20 mL) was added and the organic layer was separated. The aqueous layer was extracted with EtOAc ( $3 \times 20$  mL), and the combined organic layers were dried ( $MgSO_4$ ) and filtered. Solvent was removed to give the crude product. The product was isolated via flash chromatography on silica eluted with 0-10% ethyl acetate in hexane to give 1-(3-bromophenyl)-2-phenoxyethan-1-one as a yellow solid (473 mg, 1.63 mmol, 33%). TLC:  $R_f$  ca 0.50 (9:1 hexane: EtOAc), strong UV and  $KMnO_4$ ;  $\delta_H$  (400 MHz,  $CDCl_3$ ) 8.14 (1H, s, ArH), 7.94 (1H, d,  $J = 7.8$ , ArH), 7.75 (1H, d,  $J = 8.0$ , ArH), 7.38 (1H, t,  $J = 7.9$ , ArH), 7.30 (2H, t,  $J = 7.9$ , ArH), 7.00 (1H, t,  $J = 7.9$ , ArH), 6.95 (2H, d,  $J = 8.4$ , ArH), 5.22 (2H, s,  $CH_2$ ) ppm;  $\delta_C$  (100 MHz,  $CDCl_3$ ) 193.55 (C), 157.83 (C), 136.73 (CH), 136.29 (C), 131.43 (CH), 130.43 (CH), 129.67 (CH), 126.79 (CH), 123.17 (C), 121.88 (CH), 114.82 (CH), 70.89 ( $CH_2$ ) ppm;  $m/z$  (ES-API+) 313.0 ( $M^+ + 23$ , 100%). Data matched that reported.

$^1\text{H}$  NMR (400 MHz,  $\text{CDCl}_3$ )

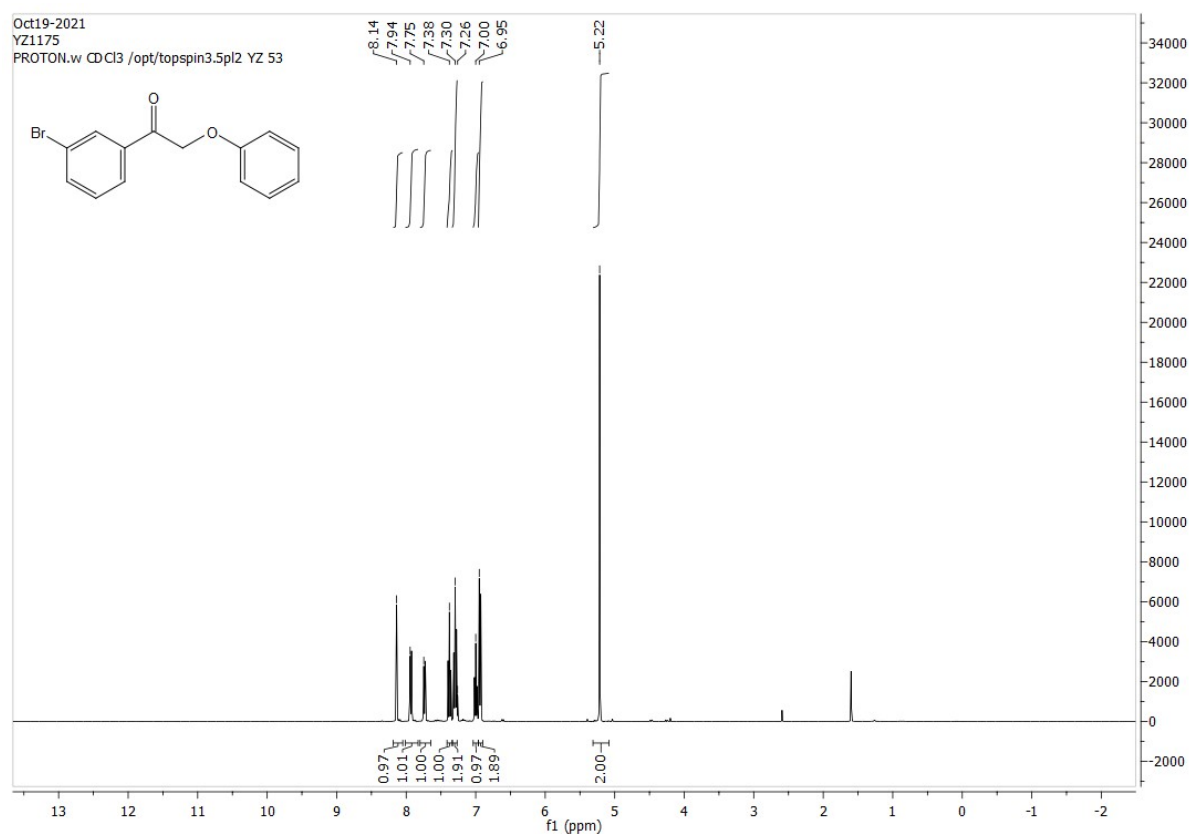

$^{13}\text{C}$  NMR (100 MHz,  $\text{CDCl}_3$ )

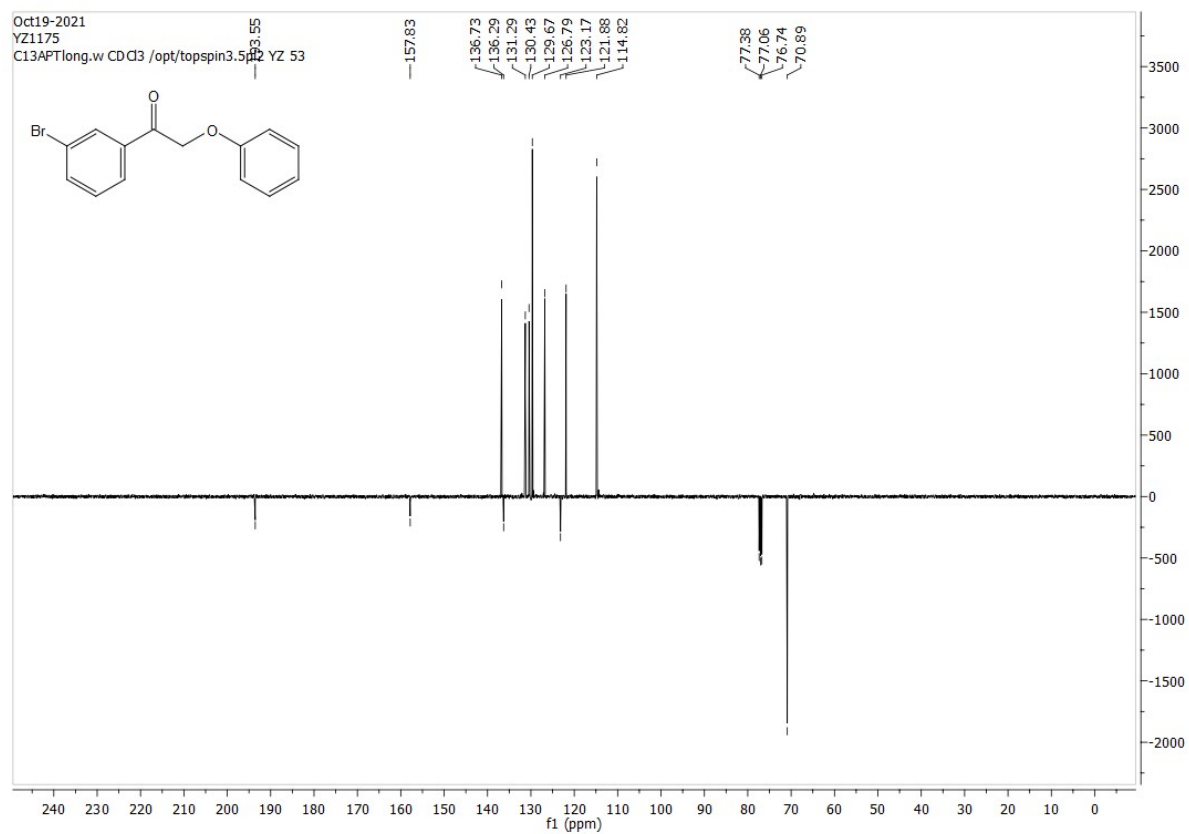

2-Phenoxy-1-(3-(4,4,5,5-tetramethyl-1,3,2-dioxaborolan-2-yl)phenyl)ethan-1-one.

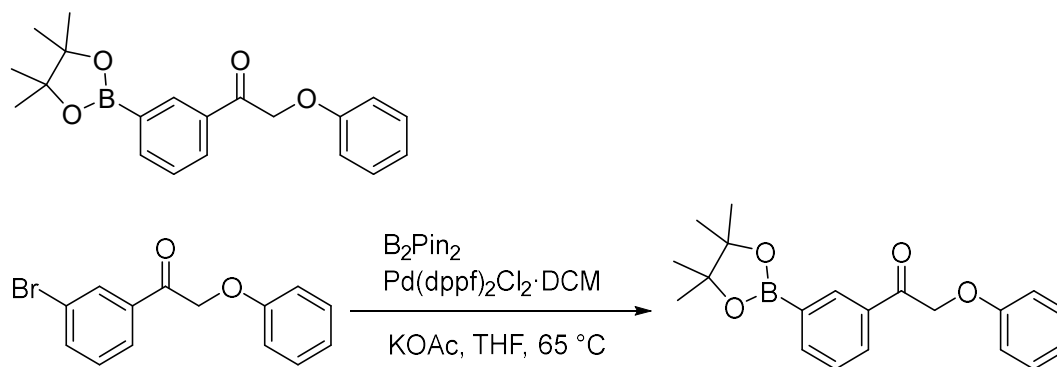

This compound is novel.

A round-bottom flask was charged with 1-(3-bromophenyl)-2-phenoxyethan-1-one (470 mg, 1.62 mmol), bis(pinacolato)diboron (493 mg, 1.94 mmol), potassium acetate (476 mg, 4.86 mmol), THF (8 mL) and  $Pd(dppf)_2Cl_2 \cdot DCM$  (66.2 mg, 0.0810 mmol). The reaction mixture was heated to 65 °C and left stirring under the nitrogen atmosphere overnight, followed by TLC (9:1 hexane: EtOAc). The mixture was quenched by distilled water (20 mL). EtOAc (20 mL) was added and the organic layer was separated. The aqueous layer was extracted with EtOAc (3 × 20 mL), and the combined organic layers were dried ( $MgSO_4$ ) and filtered. Solvent was removed to give the crude product. The product was isolated via flash chromatography on silica eluted with 0-10% ethyl acetate in hexane to give 2-phenoxy-1-(3-(4,4,5,5-tetramethyl-1,3,2-dioxaborolan-2-yl)phenyl)ethan-1-one as a white solid (321 mg, 0.950 mmol, 59%). TLC:  $R_f$  ca 0.50 (9:1 hexane: EtOAc), strong UV and  $KMnO_4$ ; Mp: 87°C; HRMS: (ESI+):  $[M+H]^+$ , Calcd for  $C_{20}H_{23}BNaO_4$  361.1571; Found 361.1582; 4.0 ppm error;  $\nu_{max}$  3061, 2975, 1702, 1600, 1488, 1389, 1371, 1329, 1209, 1120, 1076  $cm^{-1}$ ;  $\delta_H$  (400 MHz,  $CDCl_3$ ) 8.30 (1H, s, ArH), 8.04-7.69 (2H, m, ArH), 7.43 (1H, t,  $J = 7.6$ , ArH), 7.23-7.18 (2H, m, ArH), 6.92-6.87 (3H, m, ArH), 5.25 (2H, s,  $CH_2$ ), 1.29 (12H, s,  $CH_3$ ) ppm;  $\delta_C$  (100 MHz,  $CDCl_3$ ) 194.57 (C), 158.10 (C), 140.13 (CH), 134.14 (CH), 134.05 (C), 130.79 (CH), 129.55 (CH), 128.36 (CH), 121.63 (CH), 114.97 (CH), 84.29 (C), 70.84 ( $CH_2$ ), 24.90 ( $CH_3$ ) ppm;  $m/z$  (ES-API+) 361.1 ( $M^+ + 23$ , 100%).

Enantiomeric excess and conversion determined by HPLC analysis (Chiralpak IA, 30 cm x 6mm column, hexane:iPrOH 90:10, 1.0 mL/min,  $T = 25^\circ C$ ) ketone 5.2 min, *R* and *S* isomers 6.8 min and 8.5 min.

$^1\text{H}$  NMR (400 MHz,  $\text{CDCl}_3$ )

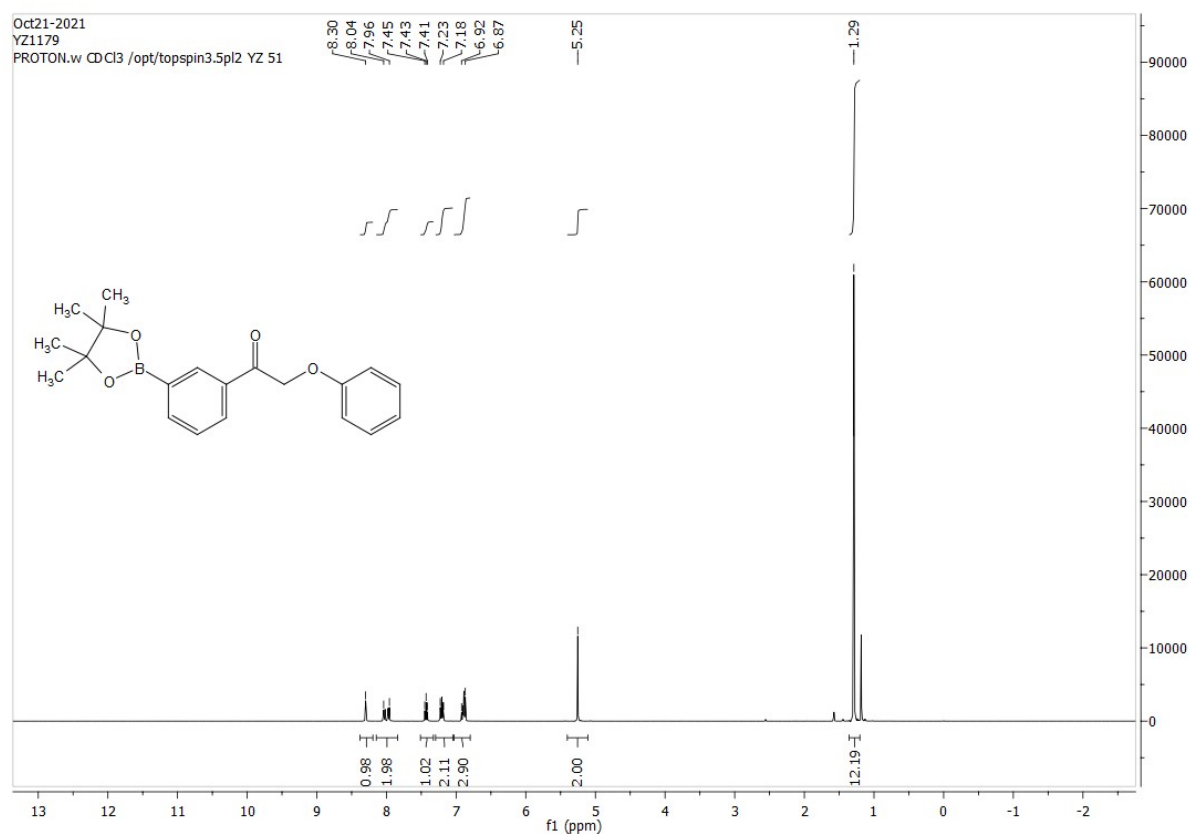

$^{13}\text{C}$  NMR (100 MHz,  $\text{CDCl}_3$ )

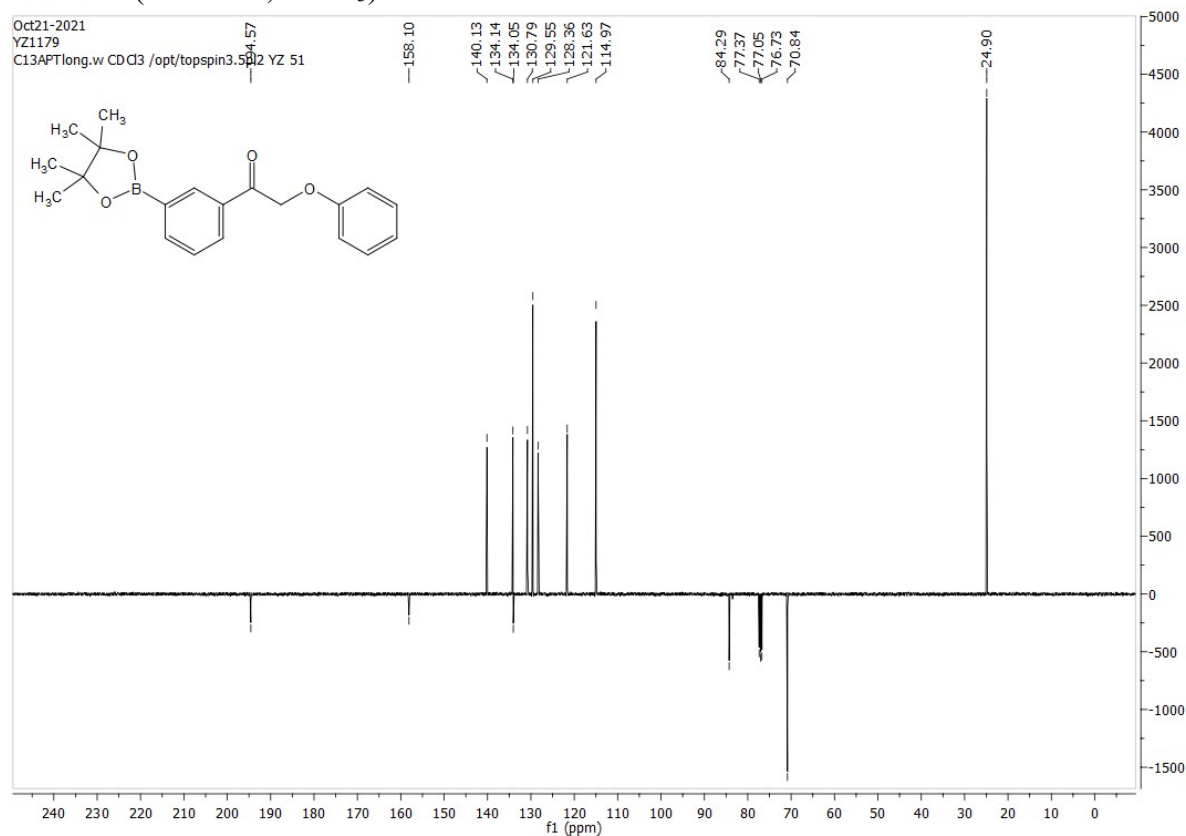



## COSY (400 MHz, CDCl<sub>3</sub>)

YZ1179  
COSY.w CDCl<sub>3</sub> /opt/topspin3.5pl2 YZ 51

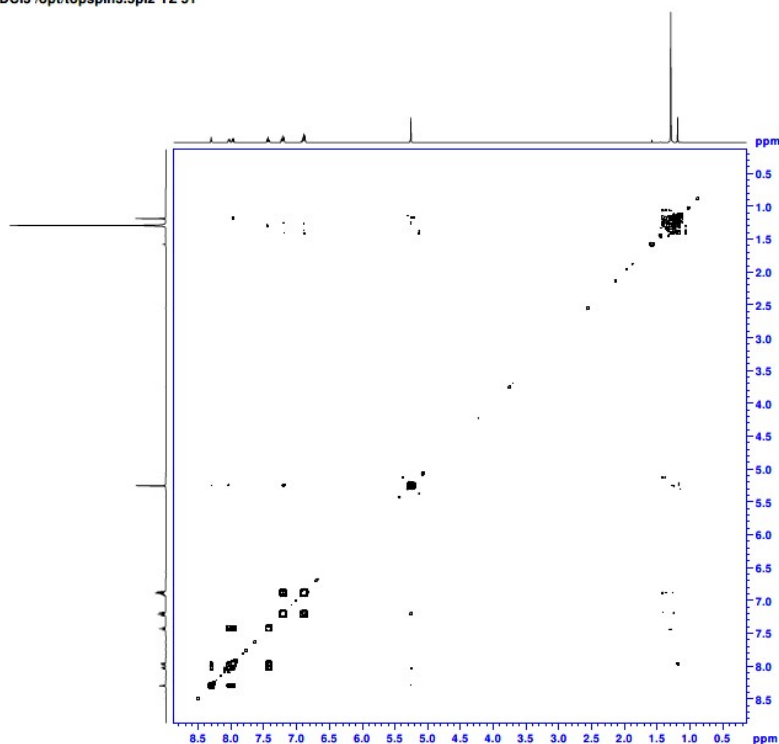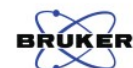

Current Data Parameters  
NAME Oct21-2021  
EXPNO 11  
PROCNO 1

F2 - Acquisition Parameters  
Date\_ 20211021  
Time 8.44 h  
INSTRUM spect  
PROBHD 1H/13C/15N  
PULPROG zgpg30  
TD 65536  
SOLVENT CDCl<sub>3</sub>  
NS 1  
DS 4  
SWH 3496.103 Hz  
FIDRES 1.707279 Hz  
AQ 0.2928640 sec  
RG 32.44  
DW 143.000 usec  
DE 4.50 usec  
TE 299.0 K  
D1 0.00000000 sec  
D11 1.90274398 sec  
D12 0.00000000 sec  
D13 0.00000000 sec  
D14 0.00000000 sec  
D15 0.00000000 sec  
D16 0.00000000 sec  
D17 0.00000000 sec  
TDav 1  
SFO1 400.1318429 MHz  
NUC1 13  
P1 14.00 usec  
P2 14.00 usec  
P3 2500.00 usec  
P4 12.82099993 Hz  
P5 2.81399999 Hz  
P6 12.82099993 Hz  
P7 12.82099993 Hz  
P8 12.82099993 Hz  
P9 12.82099993 Hz  
P10 12.82099993 Hz  
P11 12.82099993 Hz  
P12 12.82099993 Hz  
P13 12.82099993 Hz  
P14 12.82099993 Hz  
P15 12.82099993 Hz  
P16 12.82099993 Hz  
P17 12.82099993 Hz  
P18 12.82099993 Hz  
P19 12.82099993 Hz  
P20 12.82099993 Hz  
P21 12.82099993 Hz  
P22 12.82099993 Hz  
P23 12.82099993 Hz  
P24 12.82099993 Hz  
P25 12.82099993 Hz  
P26 12.82099993 Hz  
P27 12.82099993 Hz  
P28 12.82099993 Hz  
P29 12.82099993 Hz  
P30 12.82099993 Hz  
P31 12.82099993 Hz  
P32 12.82099993 Hz  
P33 12.82099993 Hz  
P34 12.82099993 Hz  
P35 12.82099993 Hz  
P36 12.82099993 Hz  
P37 12.82099993 Hz  
P38 12.82099993 Hz  
P39 12.82099993 Hz  
P40 12.82099993 Hz  
P41 12.82099993 Hz  
P42 12.82099993 Hz  
P43 12.82099993 Hz  
P44 12.82099993 Hz  
P45 12.82099993 Hz  
P46 12.82099993 Hz  
P47 12.82099993 Hz  
P48 12.82099993 Hz  
P49 12.82099993 Hz  
P50 12.82099993 Hz  
P51 12.82099993 Hz  
P52 12.82099993 Hz  
P53 12.82099993 Hz  
P54 12.82099993 Hz  
P55 12.82099993 Hz  
P56 12.82099993 Hz  
P57 12.82099993 Hz  
P58 12.82099993 Hz  
P59 12.82099993 Hz  
P60 12.82099993 Hz  
P61 12.82099993 Hz  
P62 12.82099993 Hz  
P63 12.82099993 Hz  
P64 12.82099993 Hz  
P65 12.82099993 Hz  
P66 12.82099993 Hz  
P67 12.82099993 Hz  
P68 12.82099993 Hz  
P69 12.82099993 Hz  
P70 12.82099993 Hz  
P71 12.82099993 Hz  
P72 12.82099993 Hz  
P73 12.82099993 Hz  
P74 12.82099993 Hz  
P75 12.82099993 Hz  
P76 12.82099993 Hz  
P77 12.82099993 Hz  
P78 12.82099993 Hz  
P79 12.82099993 Hz  
P80 12.82099993 Hz  
P81 12.82099993 Hz  
P82 12.82099993 Hz  
P83 12.82099993 Hz  
P84 12.82099993 Hz  
P85 12.82099993 Hz  
P86 12.82099993 Hz  
P87 12.82099993 Hz  
P88 12.82099993 Hz  
P89 12.82099993 Hz  
P90 12.82099993 Hz  
P91 12.82099993 Hz  
P92 12.82099993 Hz  
P93 12.82099993 Hz  
P94 12.82099993 Hz  
P95 12.82099993 Hz  
P96 12.82099993 Hz  
P97 12.82099993 Hz  
P98 12.82099993 Hz  
P99 12.82099993 Hz  
P100 12.82099993 Hz

## HSQC (400 MHz, CDCl<sub>3</sub>)

YZ1179  
HSQC.w CDCl<sub>3</sub> /opt/topspin3.5pl2 YZ 51

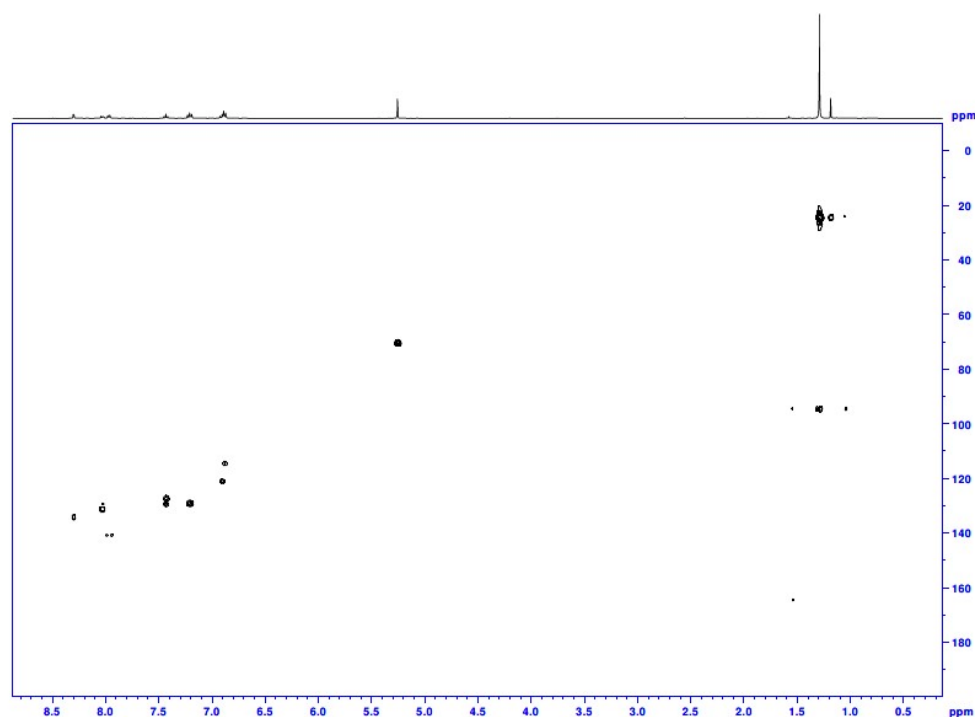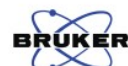

Current Data Parameters  
NAME Oct21-2021  
EXPNO 12  
PROCNO 1

F2 - Acquisition Parameters  
Date\_ 20211021  
Time 9.08 h  
INSTRUM spect  
PROBHD 1H/13C/15N  
PULPROG zgpg30  
TD 65536  
SOLVENT CDCl<sub>3</sub>  
NS 1  
DS 4  
SWH 3496.103 Hz  
FIDRES 1.707279 Hz  
AQ 0.2928640 sec  
RG 32.44  
DW 143.000 usec  
DE 4.50 usec  
TE 299.0 K  
D1 0.00000000 sec  
D11 1.90274398 sec  
D12 0.00000000 sec  
D13 0.00000000 sec  
D14 0.00000000 sec  
D15 0.00000000 sec  
D16 0.00000000 sec  
D17 0.00000000 sec  
TDav 1  
SFO1 400.1318429 MHz  
NUC1 13  
P1 14.00 usec  
P2 14.00 usec  
P3 2500.00 usec  
P4 12.82099993 Hz  
P5 2.81399999 Hz  
P6 12.82099993 Hz  
P7 12.82099993 Hz  
P8 12.82099993 Hz  
P9 12.82099993 Hz  
P10 12.82099993 Hz  
P11 12.82099993 Hz  
P12 12.82099993 Hz  
P13 12.82099993 Hz  
P14 12.82099993 Hz  
P15 12.82099993 Hz  
P16 12.82099993 Hz  
P17 12.82099993 Hz  
P18 12.82099993 Hz  
P19 12.82099993 Hz  
P20 12.82099993 Hz  
P21 12.82099993 Hz  
P22 12.82099993 Hz  
P23 12.82099993 Hz  
P24 12.82099993 Hz  
P25 12.82099993 Hz  
P26 12.82099993 Hz  
P27 12.82099993 Hz  
P28 12.82099993 Hz  
P29 12.82099993 Hz  
P30 12.82099993 Hz  
P31 12.82099993 Hz  
P32 12.82099993 Hz  
P33 12.82099993 Hz  
P34 12.82099993 Hz  
P35 12.82099993 Hz  
P36 12.82099993 Hz  
P37 12.82099993 Hz  
P38 12.82099993 Hz  
P39 12.82099993 Hz  
P40 12.82099993 Hz  
P41 12.82099993 Hz  
P42 12.82099993 Hz  
P43 12.82099993 Hz  
P44 12.82099993 Hz  
P45 12.82099993 Hz  
P46 12.82099993 Hz  
P47 12.82099993 Hz  
P48 12.82099993 Hz  
P49 12.82099993 Hz  
P50 12.82099993 Hz  
P51 12.82099993 Hz  
P52 12.82099993 Hz  
P53 12.82099993 Hz  
P54 12.82099993 Hz  
P55 12.82099993 Hz  
P56 12.82099993 Hz  
P57 12.82099993 Hz  
P58 12.82099993 Hz  
P59 12.82099993 Hz  
P60 12.82099993 Hz  
P61 12.82099993 Hz  
P62 12.82099993 Hz  
P63 12.82099993 Hz  
P64 12.82099993 Hz  
P65 12.82099993 Hz  
P66 12.82099993 Hz  
P67 12.82099993 Hz  
P68 12.82099993 Hz  
P69 12.82099993 Hz  
P70 12.82099993 Hz  
P71 12.82099993 Hz  
P72 12.82099993 Hz  
P73 12.82099993 Hz  
P74 12.82099993 Hz  
P75 12.82099993 Hz  
P76 12.82099993 Hz  
P77 12.82099993 Hz  
P78 12.82099993 Hz  
P79 12.82099993 Hz  
P80 12.82099993 Hz  
P81 12.82099993 Hz  
P82 12.82099993 Hz  
P83 12.82099993 Hz  
P84 12.82099993 Hz  
P85 12.82099993 Hz  
P86 12.82099993 Hz  
P87 12.82099993 Hz  
P88 12.82099993 Hz  
P89 12.82099993 Hz  
P90 12.82099993 Hz  
P91 12.82099993 Hz  
P92 12.82099993 Hz  
P93 12.82099993 Hz  
P94 12.82099993 Hz  
P95 12.82099993 Hz  
P96 12.82099993 Hz  
P97 12.82099993 Hz  
P98 12.82099993 Hz  
P99 12.82099993 Hz  
P100 12.82099993 Hz



Racemic and (*S*)-phenoxy-1-(3-(4,4,5,5-tetramethyl-1,3,2-dioxaborolan-2-yl)phenyl)ethan-1-ol **10**.

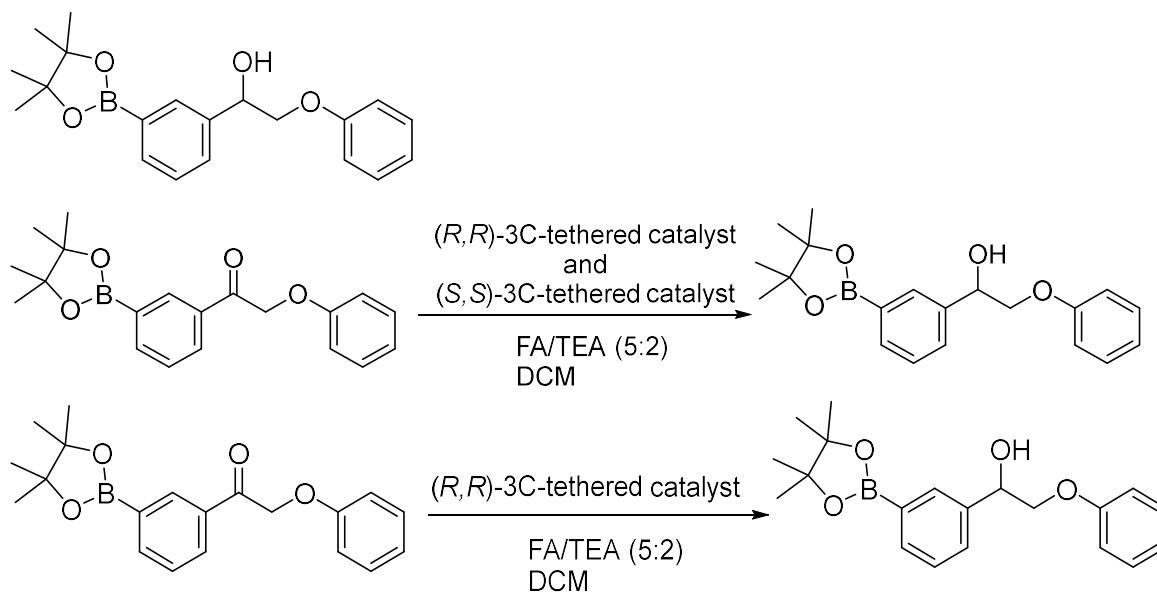

This compound is novel.

#### Synthesis of a racemic standard:

(*R,R*)-3C-Tethered Ru(II)-TsDPEN catalyst **2** (0.74 mg, 1.2  $\mu$ mol, 0.5 mol%) and (*S,S*)-3C-tethered Ru(II)-TsDPEN catalyst **2** (0.74 mg, 1.2  $\mu$ mol, 0.5 mol%) were added to FA: TEA (5:2 azeotropic mixture, 0.36 mL) at rt and the mixture was stirred under a nitrogen atmosphere for 15 minutes; after which a solution of 2-phenoxy-1-(3-(4,4,5,5-tetramethyl-1,3,2-dioxaborolan-2-yl)phenyl)ethan-1-one (80.0 mg, 0.237 mmol) in DCM (0.54 mL) was added. The reaction mixture was stirred under a nitrogen atmosphere and followed by TLC (9:1 hexane: EtOAc). After 72 hours, the reaction was quenched using saturated NaHCO<sub>3</sub> solution (20 mL). EtOAc (20 mL) was added and the organic layer was separated. The aqueous layer was extracted with EtOAc (3 x 20 mL) and the combined organic layers were dried (MgSO<sub>4</sub>) and filtered. The solvent was removed to give the crude product. The product was isolated via flash chromatography on silica eluted with 0-20% EtOAc in hexane to give 2-phenoxy-1-(3-(4,4,5,5-tetramethyl-1,3,2-dioxaborolan-2-yl)phenyl)ethan-1-ol **10** as a yellow oil (45.0 mg, 0.132 mmol, 56%). TLC: R<sub>f</sub> ca 0.20 (9:1 hexane: EtOAc), strong UV and KMnO<sub>4</sub>; HRMS: (found (ESI<sup>+</sup>): [M+H]<sup>+</sup>, Calcd for C<sub>20</sub>H<sub>25</sub>BNaO<sub>4</sub> 363.1738; Found 363.1738; 1.1 ppm error;  $\nu_{\text{max}}$  3456 (br), 2977, 2928, 1599, 1495, 1353, 1240, 1107, 1038, 752 cm<sup>-1</sup>;  $\delta_{\text{H}}$  (500 MHz, CDCl<sub>3</sub>) 7.80 (1H, s, ArH), 7.71 (1H, d, *J* = 7.3, ArH), 7.51 (1H, d, *J* = 7.7, ArH), 7.33 (1H, t, *J* = 7.5, ArH), 7.22-7.18 (2H, m, ArH),

6.91-6.84 (3H, m, ArH), 5.07 (1H, d,  $J = 8.8$ , ArCH), 4.05 (1H, dd,  $J = 9.6, 3.1$ , CH<sub>2</sub>), 3.94 (1H, t,  $J = 9.3$ , CH<sub>2</sub>), 2.74 (1H, d,  $J = 2.0$ , OH), 1.27 (12H, s, CH<sub>3</sub>) ppm;  $\delta_c$  (125 MHz, CDCl<sub>3</sub>) 158.43 (C), 128.94 (C), 134.67 (CH), 132.61 (CH), 129.55 (CH), 129.21 (CH), 128.06 (CH), 121.29 (CH), 114.71 (CH), 83.94 (C), 73.35 (CH<sub>2</sub>), 72.64 (CH), 24.89 (CH<sub>3</sub>) ppm;  $m/z$  (ES-API+) 363.2 ( $M^+ + 23$ , 100%).

Enantiomeric excess and conversion determined by HPLC analysis (Chiralpak IA, 30 cm x 6mm column, hexane:iPrOH 90:10, 1.0 mL/min,  $T = 25^\circ\text{C}$ ) ketone 5.2 min, *R* and *S* isomers 6.8 min and 8.5 min, configuration assigned by analogy with **9**.

ATH of 2-phenoxy-1-(3-(4,4,5,5-tetramethyl-1,3,2-dioxaborolan-2-yl)phenyl)ethan-1-one:

(*R,R*)-3C-tethered Ru(II)-TsDPEN catalyst **2** (1.5 mg, 2.4  $\mu\text{mol}$ , 1 mol%) was added to FA: TEA (5:2 azeotropic mixture, 0.36 mL) at rt and the mixture was stirred under a nitrogen atmosphere for 15 minutes; after which a solution of 2-phenoxy-1-(3-(4,4,5,5-tetramethyl-1,3,2-dioxaborolan-2-yl)phenyl)ethan-1-one (80.0 mg, 0.237 mmol) in DCM (0.54 mL) was added. The reaction mixture was stirred under a nitrogen atmosphere and followed by TLC (9:1 hexane: EtOAc). After 72 hours, the reaction was quenched using saturated NaHCO<sub>3</sub> solution (20 mL). EtOAc (20 mL) was added and the organic layer was separated. The aqueous layer was extracted with EtOAc (3 x 20 mL) and the combined organic layers were dried (MgSO<sub>4</sub>) and filtered. The solvent was removed to give the crude product. The product was isolated via flash chromatography on silica eluted with 0-20% EtOAc in hexane to give (*S*)-2-phenoxy-1-(3-(4,4,5,5-tetramethyl-1,3,2-dioxaborolan-2-yl)phenyl)ethan-1-ol **10** as a yellow oil (49.0 mg, 0.144 mmol, 61%). The reaction was also followed by HPLC (Chiralpak IA, 30 cm x 6mm column, hexane:iPrOH 90:10, 1.0 mL/min,  $T = 25^\circ\text{C}$ ):  $[\alpha]_D^{23} +47.0$  (c 0.245 in CHCl<sub>3</sub>) 97% ee.

<sup>1</sup>H NMR (500 MHz, CDCl<sub>3</sub>)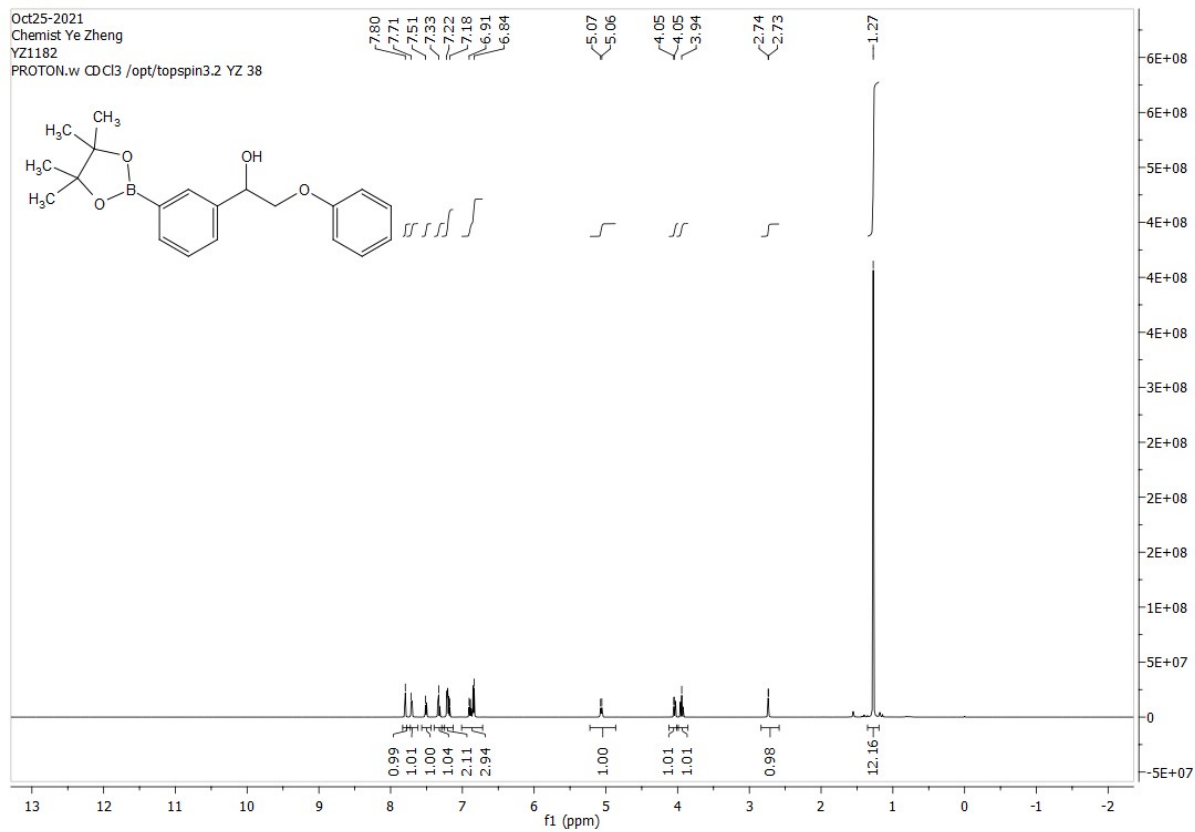 $^{13}\text{C}$  NMR (125 MHz,  $\text{CDCl}_3$ )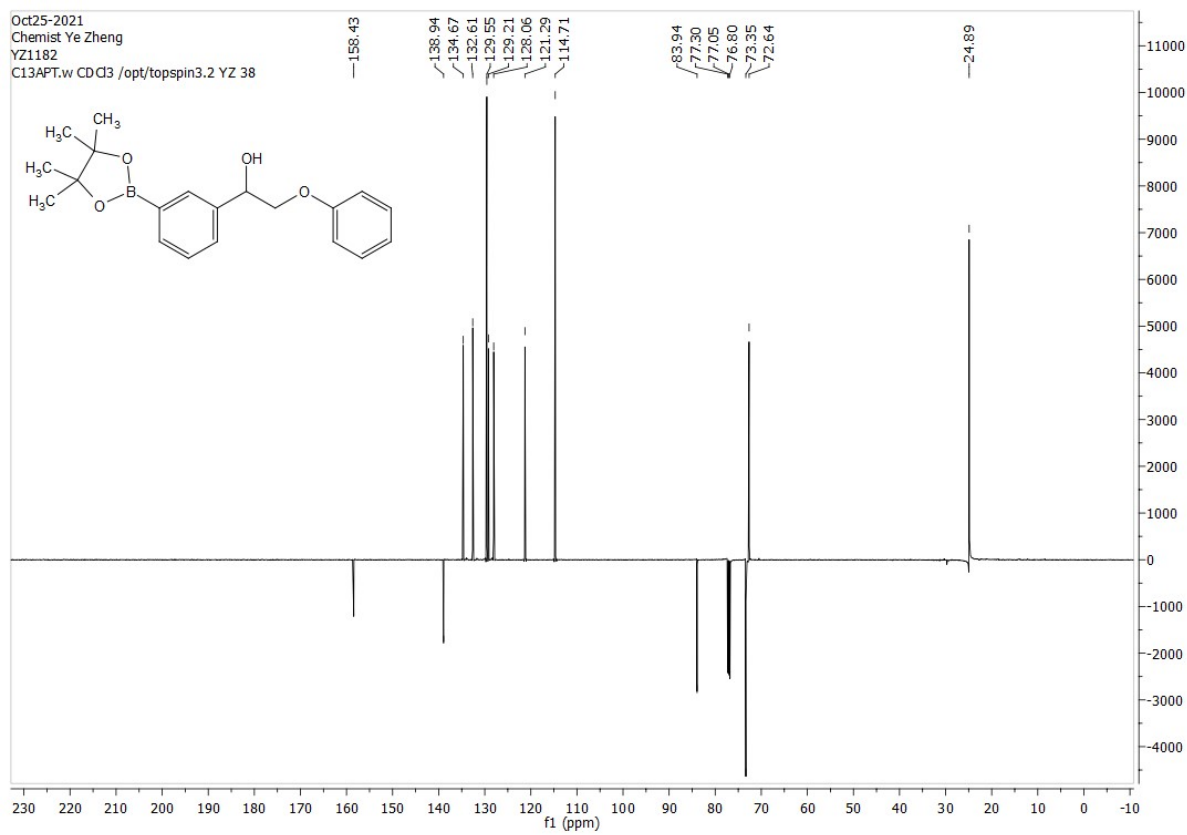

COSY (500 MHz, CDCl<sub>3</sub>)

Chemist Ye Zheng  
YZ1182  
COSY.w CDCI3 /opt/topspin3.2 YZ 38

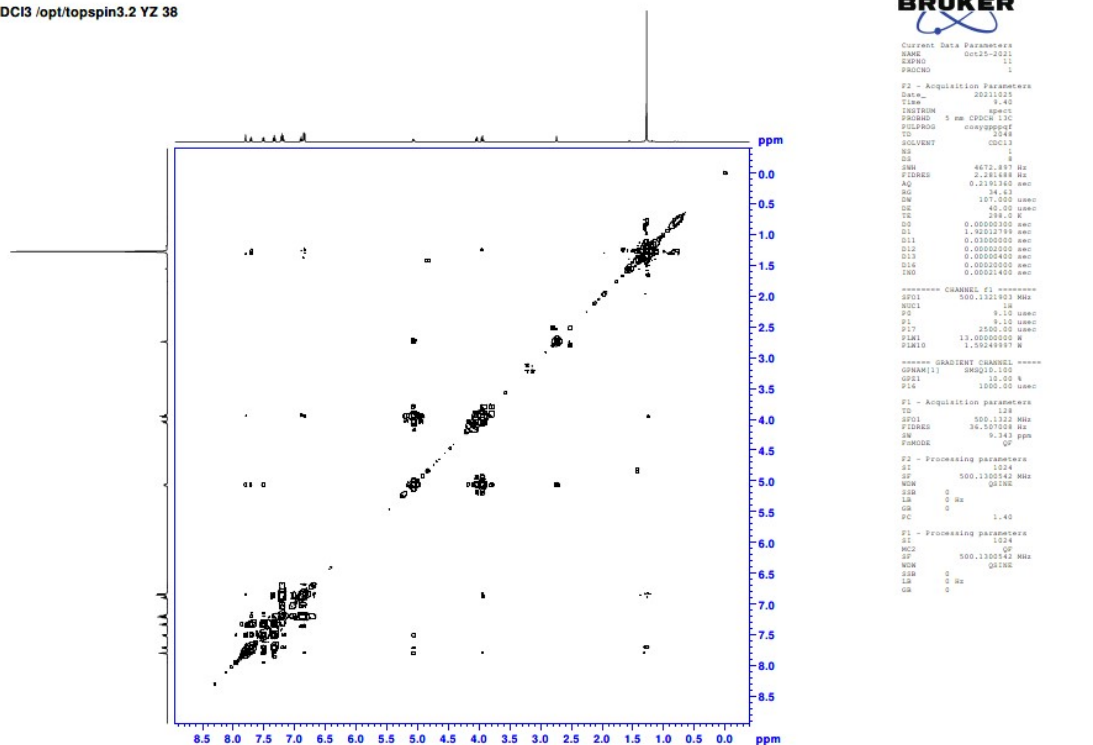

```

Current Data Parameters
NAME          Oct15-2021
EXPNO        11
PROCNO       11

F2 - Acquisition Parameters
Date_        20211025
Time         9.40
INSTRUM      spect
PROBHD       5 mm CDPCH 13C
PULPROG      zgpgpgpg
TD           65536
SOLVENT      CDCl3
NS            504
DS            1
SWH           4672.897 Hz
F2FREQ       2.214184 Hz
AQ            0.2191362 sec
RG            34.43
AQ            187.000 usec
DE            40.00 usec
TE            299.0 K
0.00000000 sec
D1            1.92017399 sec
D11           0.03000000 sec
D12           0.00000000 sec
D13           0.00000400 sec
D14           0.00020000 sec
D15           0.00010000 sec

```

```

***** CHANNEL F1 *****
SF01      500.1321903 MHz
NOC1      18
P0        9.10 uWatt
P1        9.10 uWatt
P17       2500.00 uWatt
PWL1      13.00000000 N
PWL10     1.59249897 N

***** GRADIENT CHANNEL *****
GPRAM[1]  SMGQIP.100
GSE1      10.00 N
P16       1000.00 uWatt

F1 - Acquisition parameters
TS        128
SF01      500.13222 MHz
FIDRES    36.507008 Hz
SW        6.343 pps
SOLVENT    CD

```

| F1 - Processing parameters |                 |
|----------------------------|-----------------|
| SI                         | 1024            |
| SF                         | 500.1300542 MHz |
| WDW                        | GAUSS           |
| SIR                        | 0               |
| LR                         | 0 Hz            |
| GR                         | 0               |
| PC                         | 1.40            |

```

F1 - Processing parameters
SI          1024
MC2         QF
SF          500.1300542 MHz
WDW         QWINE
SSB         0
LR          0 Hz
GB          0

```

HSQC (500 MHz, CDCl<sub>3</sub>)HSQC.w CDCI3 /opt/topspin3.2 YZ 38 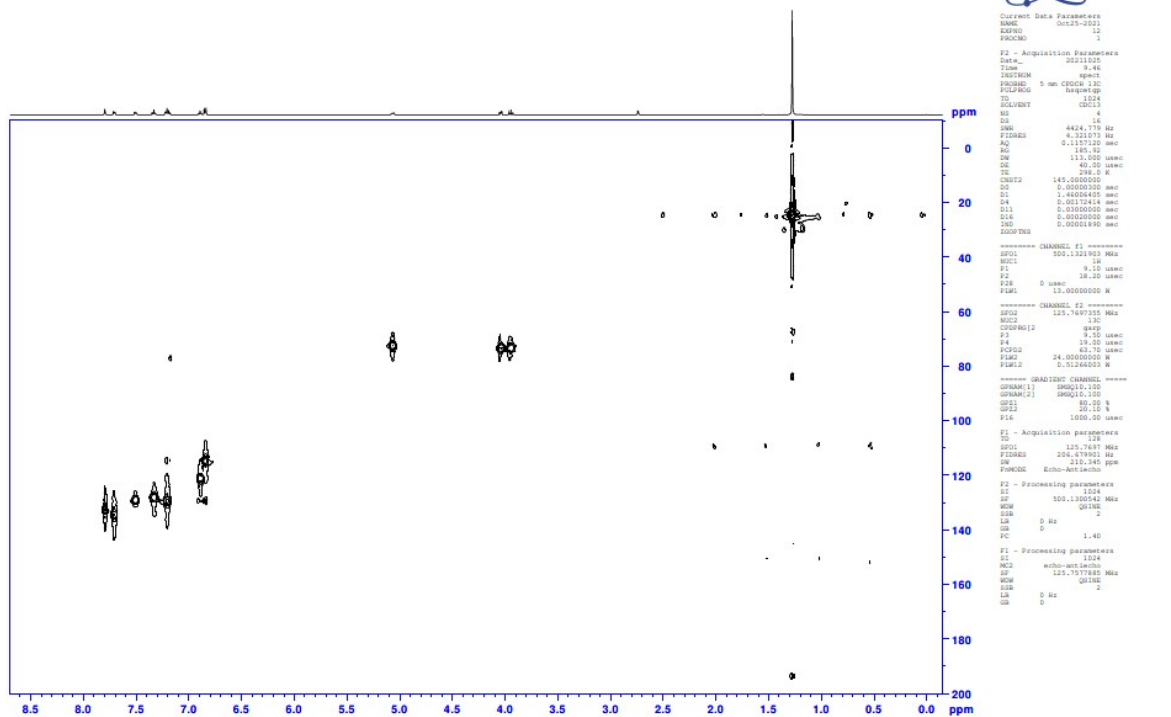

```

Current Data Parameters
NAME          Oct25-2021
EXPNO        12
PROCNO       12

F2 - Acquisition Parameters
Date_         20211025
Time          9.46
INSTRUM       spectim
PROBHD        5 mm CPDCH 13C
PULPROG       zgpg30
TD            1024
SOLVENT       CDCl3
NS            400
DS            16
SWH           48424.775 Hz
FIDRES        0.33107183
AQ            0.1157120 sec
RG            189.12
WDW            113.000 used
SSB            40.50 used
GB            298.00
CNETZ2        145.0000000
DZ            0.0000000 sec
DZ1           1.4400000 sec
D4            0.00172414 sec
D51           0.0000000 sec
D6            0.0000000 sec
D62           0.0001890 sec
END
ENDPROCFS
===== /F2/ENDPROC=====

```

```

SP01      500.1321093 Mhz
MC01      1W
P1        9.10 used
P2        18.20 used
P2R       0 used
FREQ1     13.02000000 W

***** CHANNEL f2 *****
SP02      125.7697355 Mhz
MC02      3.3C
CP02PRG[2] gap
P3        9.50 used
P4        19.00 used
P4PRG2    63.70 used
FREQ2     24.00000000 W
FREQ2L    0.51266003 W

***** GRADIENT CHANNEL *****
GRPHAW[1]  SRG10.150
GRPHAW[2]  SRG10.150
GP1       80.00 %
GP2       20.10 %

```

```

F1 - Acquisition parameters
TD      328
SF01    125.7697 MHz
FIDRES   206.679901 Hz
SW        210.345 ppm
FWDGE     Echo-Antiecho

F2 - Processing parameters
SI        1024
SF        500.130542 MHz
WDW       GQ1N1
SSB        2
LA         0 Hz
GB         0
PC         1.40

```

```

F1 - Processing parameters
SI                1024
MC2              echo-antiecho
SF              125.7577885 MHz
GCMW             QG1NE
SSB              2
LB              0 Hz
GB              0

```



HPLC after ATH of 2-phenoxy-1-(3-(4,4,5,5-tetramethyl-1,3,2-dioxaborolan-2-yl)phenyl)ethan-1-one using (*R,R*)-3C-Tethered Ru(II)-TsDPEN catalyst **2** (after 72 hours, 100% conversion, 97% ee).

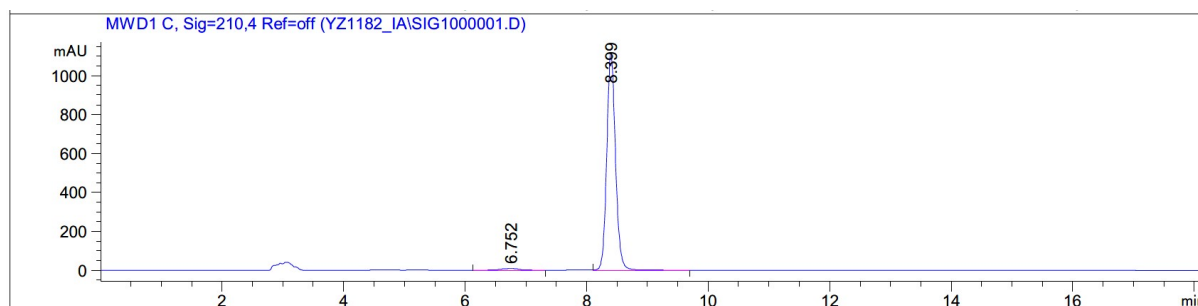

Signal 2: MWD1 C, Sig=210,4 Ref=off

| Peak # | RetTime [min] | Type | Width [min] | Area [mAU*s] | Height [mAU] | Area %  |
|--------|---------------|------|-------------|--------------|--------------|---------|
| 1      | 6.752         | BB   | 0.3197      | 192.61708    | 9.07122      | 1.6897  |
| 2      | 8.399         | VB   | 0.1552      | 1.12071e4    | 1116.03772   | 98.3103 |

Totals : 1.13997e4 1125.10894



1-(3-Bromophenyl)-2-morpholinoethan-1-one.

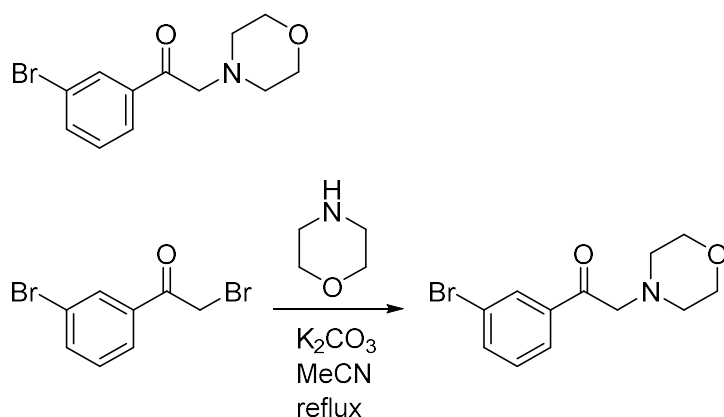

This compound is novel.

To a solution of 2-bromo-1-(3-bromophenyl)ethan-1-one (2.00 g, 7.25 mmol) in MeCN (40 mL) was added morpholine (948 mg, 10.9 mmol) and potassium carbonate (3.00 g, 21.7 mmol). The reaction mixture was heated to 85 °C and left stirring under a nitrogen atmosphere for 1 hour, followed by TLC (1:1 hexane: EtOAc). The mixture was quenched by distilled water (20 mL). Et<sub>2</sub>O (20 mL) was added and the organic layer was separated. The aqueous layer was extracted with Et<sub>2</sub>O (3 × 20 mL), and the combined organic layers were dried (MgSO<sub>4</sub>) and filtered. Solvent was removed to give the crude product. The product was isolated via flash chromatography on silica eluted with 50-100% ethyl acetate in hexane to give 1-(4-bromophenyl)-2-morpholinoethan-1-one as a yellow solid (1.82 g, 6.43 mmol, 89%). TLC: R<sub>f</sub> ca 0.40 (1:1 hexane: EtOAc), strong UV and KMnO<sub>4</sub>; Mp: 75°C; HRMS: (found (ESI<sup>+</sup>): [M+H]<sup>+</sup>, Calcd for C<sub>12</sub>H<sub>15</sub>BrNO<sub>2</sub> 284.0278; Found 284.0281; 0.9 ppm error;  $\nu_{\max}$  2963, 2863, 1696, 1564, 1449, 1416, 1298, 1213, 1163, 1142, 1107, 10840, 900, 864, 783 cm<sup>-1</sup>;  $\delta_H$  (400 MHz, CDCl<sub>3</sub>) 8.12 (1H, s, ArH), 7.93 (1H, d,  $J$  = 7.9, ArH), 7.70 (1H, d,  $J$  = 7.9, ArH), 7.33 (1H, t,  $J$  = 7.9, ArH), 3.82-3.68 (6H, m, CH<sub>2</sub>), 2.64-2.53 (4H, m, CH<sub>2</sub>) ppm;  $\delta_C$  (100 MHz, CDCl<sub>3</sub>) 194.91 (C), 137.62 (C), 136.20 (CH), 131.24 (CH), 130.20 (CH), 126.72 (CH), 122.92 (C), 66.81 (CH<sub>2</sub>), 64.88 (CH<sub>2</sub>), 53.84 (CH<sub>2</sub>) ppm; m/z (ES-API<sup>+</sup>) 284.0 (M<sup>+</sup> + 23, 100%).

$^1\text{H}$  NMR (400 MHz,  $\text{CDCl}_3$ )

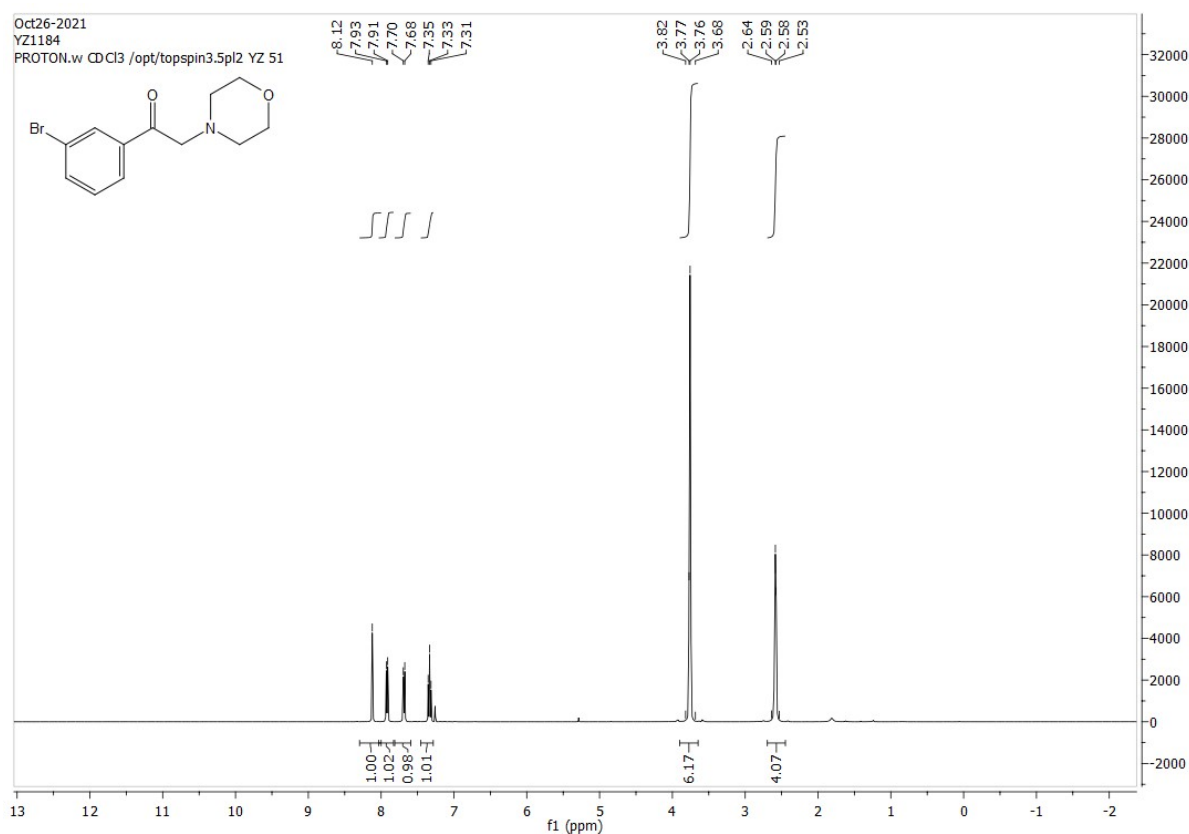

$^{13}\text{C}$  NMR (100 MHz,  $\text{CDCl}_3$ )

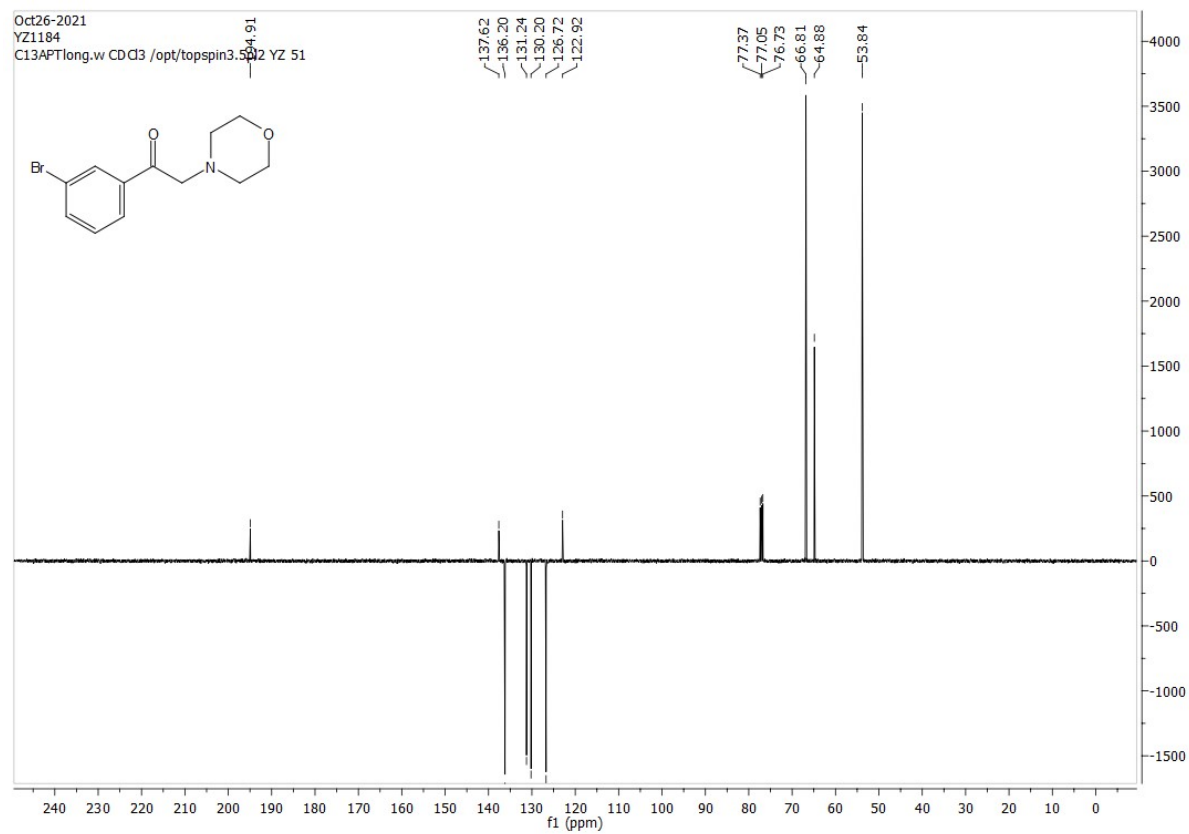

COSY (400 MHz, CDCl<sub>3</sub>)

YZ1184  
COSY.w CDCI3 /opt/topspin3.5pl2 YZ 51

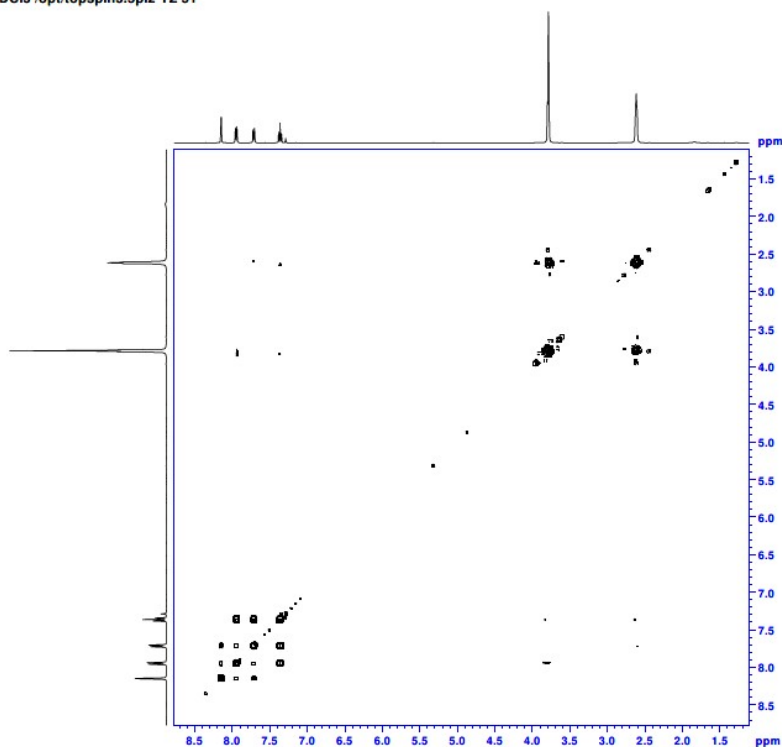[illegible]HSQC (400 MHz, CDCl<sub>3</sub>)YZ1184  
HSQC.w CDCI3 /opt/topspin3.5pl2 YZ 51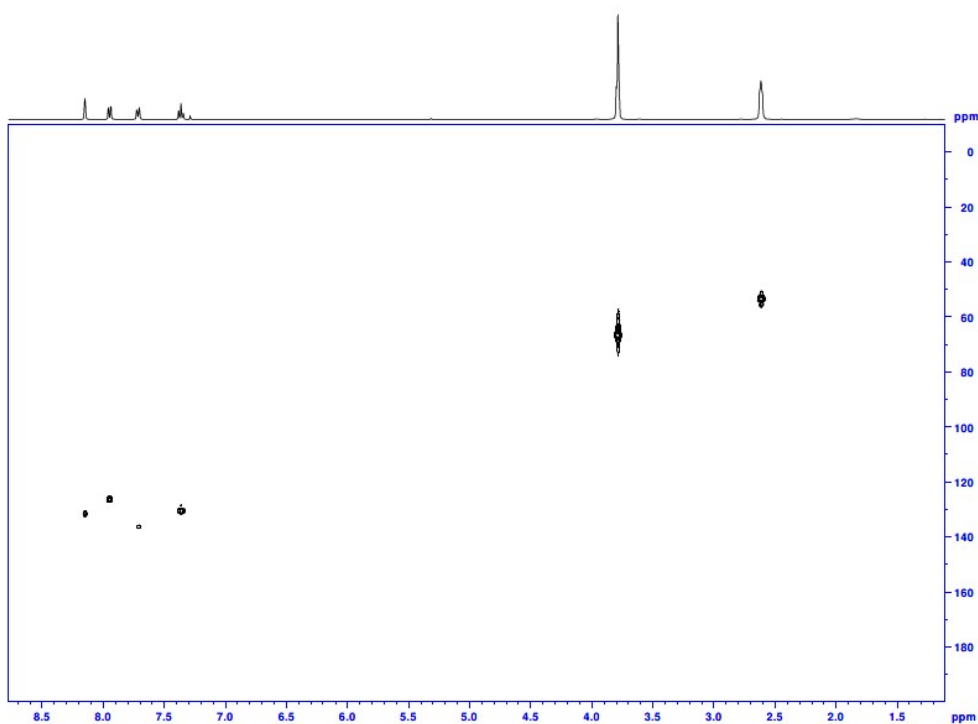[illegible]

# HMBC (400 MHz, CDCl<sub>3</sub>)

YZ1184  
HMBC.w CDCl<sub>3</sub> /opt/topspin3.5pl2 YZ 51

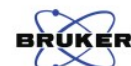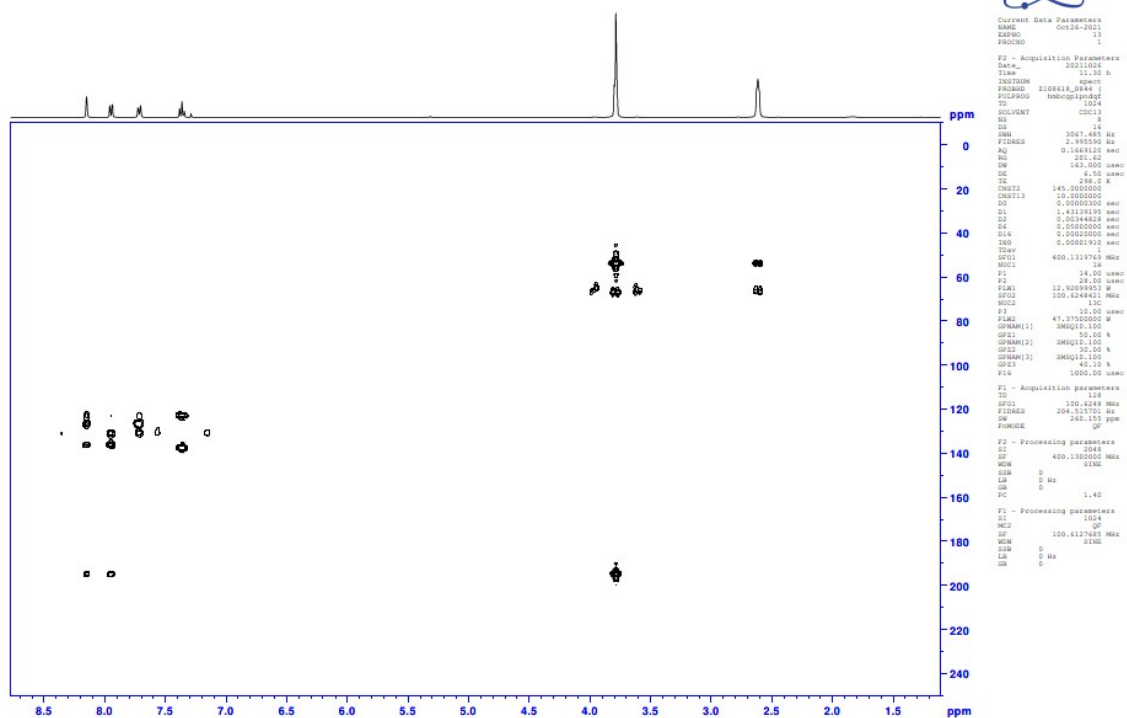

2-Morpholino-1-(3-(4,4,5,5-tetramethyl-1,3,2-dioxaborolan-2-yl)phenyl)ethan-1-one.

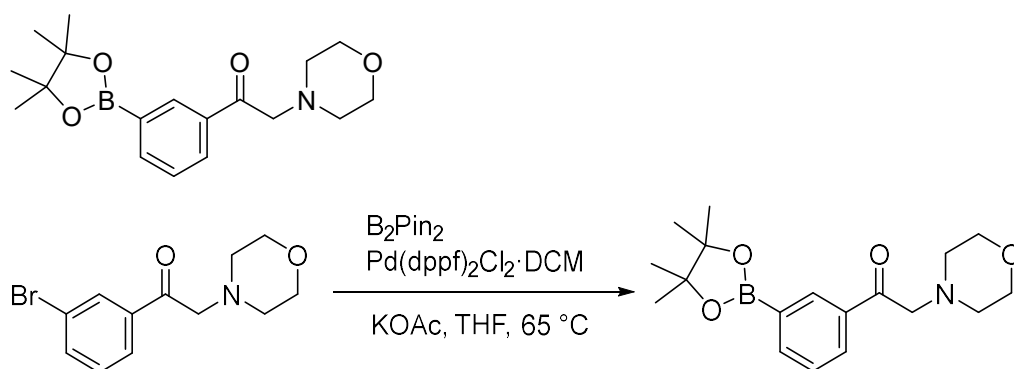

This compound is novel.

A round-bottom flask was charged with 1-(3-bromophenyl)-2-morpholinoethan-1-one (1.80 g, 6.36 mmol), bis(pinacolato)diboron (1.94 g, 7.63 mmol), potassium acetate (1.87 g, 19.1 mmol), THF (31 mL) and  $Pd(dppf)_2Cl_2 \cdot DCM$  (260 mg, 0.318 mmol).

The reaction mixture was heated to 65 °C and left stirring under the nitrogen atmosphere overnight, followed by TLC (1:1 hexane: EtOAc). The mixture was quenched by distilled water (20 mL). EtOAc (20 mL) was added and the organic layer was separated. The aqueous layer was extracted with EtOAc ( $3 \times 20$  mL), and the combined organic layers were dried ( $MgSO_4$ ) and filtered. Solvent was removed to give the crude product. The product was isolated via flash chromatography on silica eluted with 50-100% ethyl acetate in hexane to give 2-morpholino-1-(3-(4,4,5,5-tetramethyl-1,3,2-dioxaborolan-2-yl)phenyl)ethan-1-one as a brown oil (955 mg, 2.89 mmol, 47%). TLC:  $R_f$  ca 0.20 (1:1 hexane: EtOAc), strong UV and  $KMnO_4$ ; HRMS: (found (ESI<sup>+</sup>):  $[M+H]^+$ , Calcd for  $C_{18}H_{27}BNO_4$  332.2027; Found 332.2028; 1.3 ppm error;  $\nu_{max}$  2976, 1696, 1599, 1357, 1312, 1214, 1140, 1114, 961  $cm^{-1}$ ;  $\delta_H$  (400 MHz,  $CDCl_3$ ) 8.33 (1H, s, ArH), 8.08 (1H, d,  $J = 7.6$ , ArH), 8.00 (1H, d,  $J = 7.6$ , ArH), 7.46 (1H, t,  $J = 7.6$ , ArH), 3.88 (2H, s,  $CH_2$ ), 3.79-3.77 (4H, m,  $CH_2$ ), 2.64-2.62 (4H, m,  $CH_2$ ), 1.35 (12H, s,  $CH_3$ ) ppm;  $\delta_C$  (100 MHz,  $CDCl_3$ ) 196.06 (C), 139.64 (CH), 135.39 (C), 134.11 (CH), 130.72 (CH), 128.12 (CH), 84.21 (C), 66.66 ( $CH_2$ ), 64.47 ( $CH_2$ ), 53.84 ( $CH_2$ ), 24.88 ( $CH_3$ ) ppm;  $m/z$  (ES-API<sup>+</sup>) 332.2 ( $M^+ + 1$ , 100%).

Enantiomeric excess and conversion determined by HPLC analysis (Chiralpak IC, 30 cm x 6mm column, hexane:iPrOH 90:10, 1.0 mL/min,  $T = 25^\circ C$ ) ketone 15.6 min, *R* and *S* isomers 12.3 min and 21.1 min.

$^1\text{H}$  NMR (400 MHz,  $\text{CDCl}_3$ )

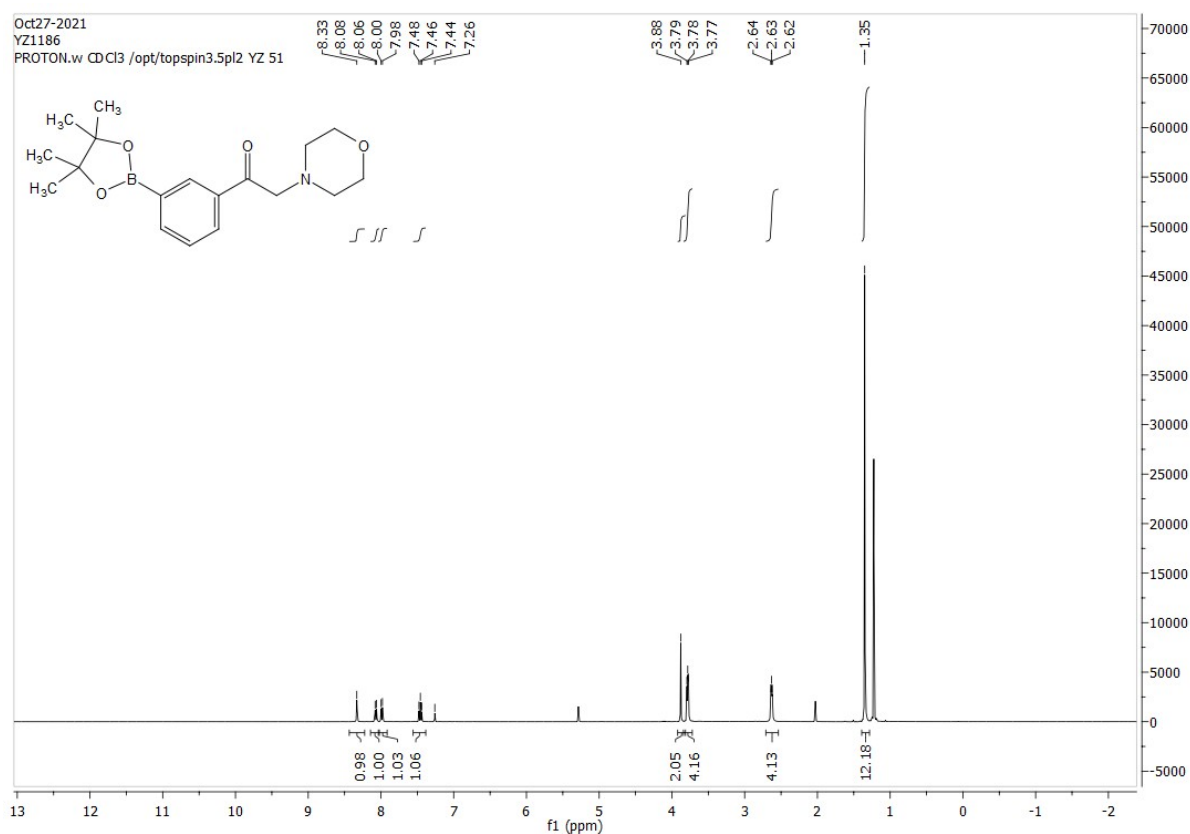

$^{13}\text{C}$  NMR (100 MHz,  $\text{CDCl}_3$ )

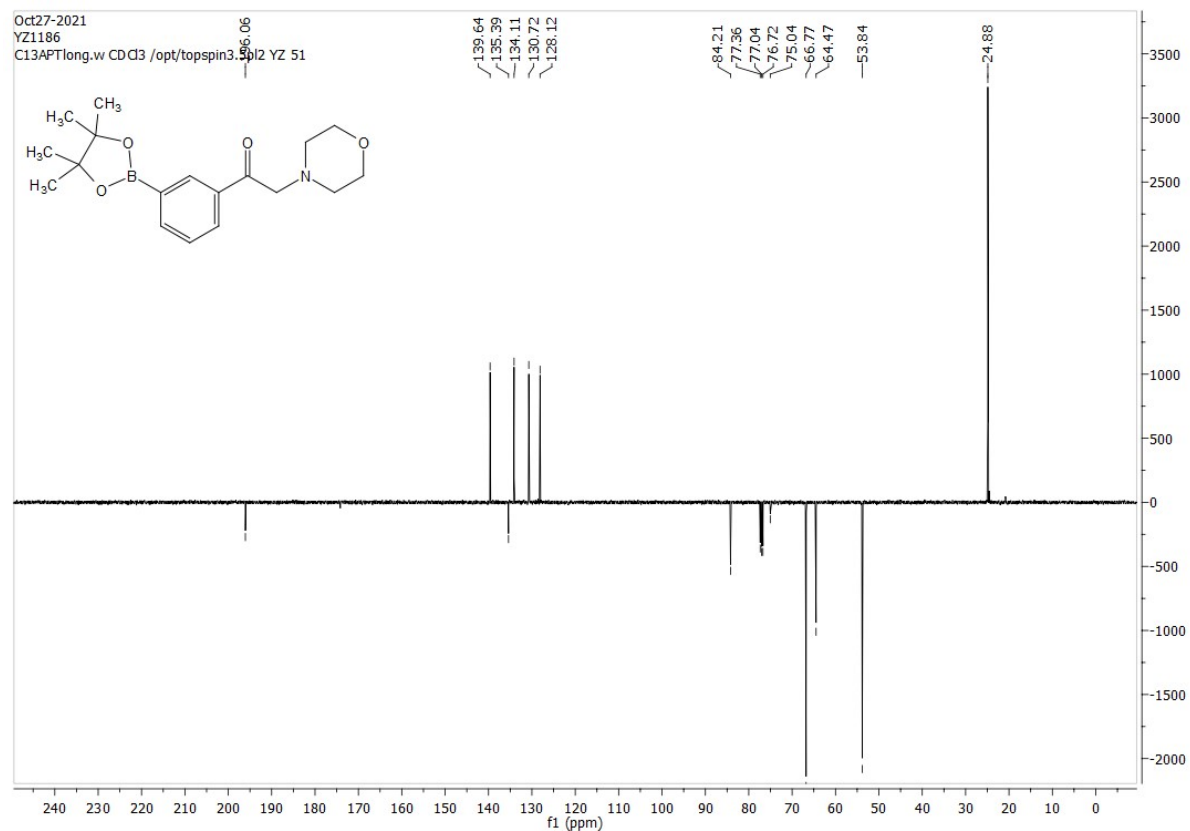

## COSY (400 MHz, CDCl<sub>3</sub>)

YZ1186  
COSY.w CDCl<sub>3</sub> /opt/topspin3.5pl2 YZ 51

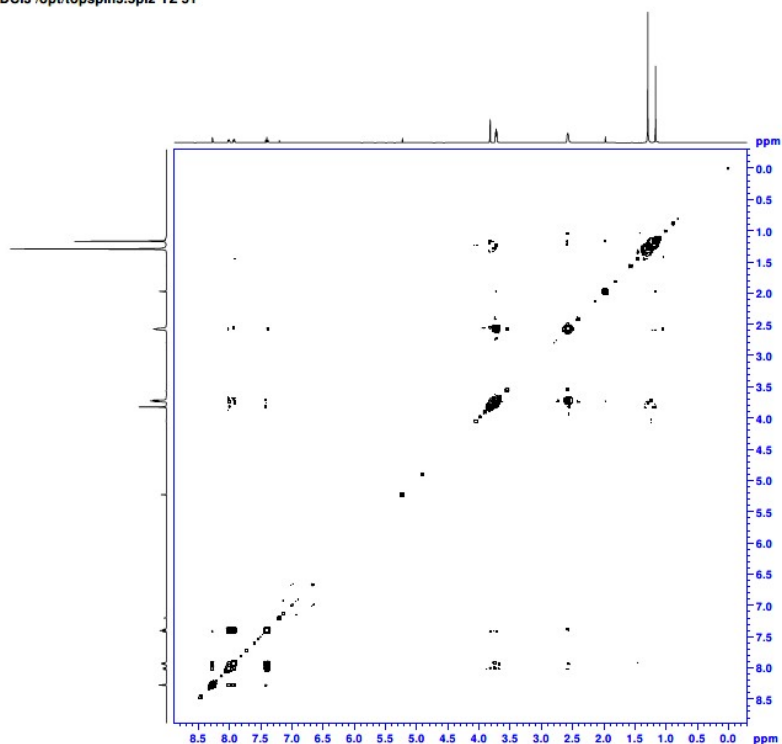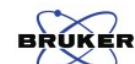

Current Data Parameters  
NAME Oct27-2021  
EXPNO 12  
PROCNO 1

F2 - Acquisition Parameters  
Date\_ 20210227  
Time 8:47 h  
INSTRUM spect  
PROBHD 1HBOA18\_0044  
PULPROG zgpg30  
TD 65536  
SOLVENT CDCl<sub>3</sub>  
NS 1  
DS 4  
SWH 3676.471 Hz  
FIDRES 1.795132 Hz  
AQ 0.2785280 sec  
RG 32.14  
SW 136.000 usec  
TE 298.2 K  
D1 0.00000000 sec  
D11 1.91607987 sec  
D12 0.03000000 sec  
D13 0.00000000 sec  
D16 0.00000000 sec  
DRO 0.00007100 sec  
TDav 1  
SFO1 400.1317515 MHz  
NUC1 1H  
P1 14.00 usec  
P2 14.00 usec  
P3 250.00 usec  
P4 12.92099953 Hz  
P4B2 2.81399988 Hz  
GPRM11 0.00010.100  
GPRM12 0.00010.100  
GPRM13 0.00010.100  
GPRM14 1000.00 usec

F1 - Acquisition parameters  
TD 65536  
SFO1 400.1317515 MHz  
FIDRES 1.795132 Hz  
AQ 0.2785280 sec  
RG 32.14  
SW 136.000 usec  
TE 298.2 K  
D1 0.00000000 sec  
D11 1.91607987 sec  
D12 0.03000000 sec  
D13 0.00000000 sec  
D16 0.00000000 sec  
DRO 0.00007100 sec  
TDav 1  
SFO1 400.1317515 MHz  
NUC1 1H  
P1 14.00 usec  
P2 14.00 usec  
P3 250.00 usec  
P4 12.92099953 Hz  
P4B2 2.81399988 Hz  
GPRM11 0.00010.100  
GPRM12 0.00010.100  
GPRM13 0.00010.100  
GPRM14 1000.00 usec

F2 - Processing parameters  
SI 32768  
SF 400.1300440 MHz  
WDW 0  
SSB 0  
LA 0 Hz  
GB 0  
PC 1.40

F1 - Processing parameters  
SI 32768  
SF 400.1300440 MHz  
WDW 0  
SSB 0  
LA 0 Hz  
GB 0  
PC 1.40

## HSQC (400 MHz, CDCl<sub>3</sub>)

YZ1186  
HSQC.w CDCl<sub>3</sub> /opt/topspin3.5pl2 YZ 51

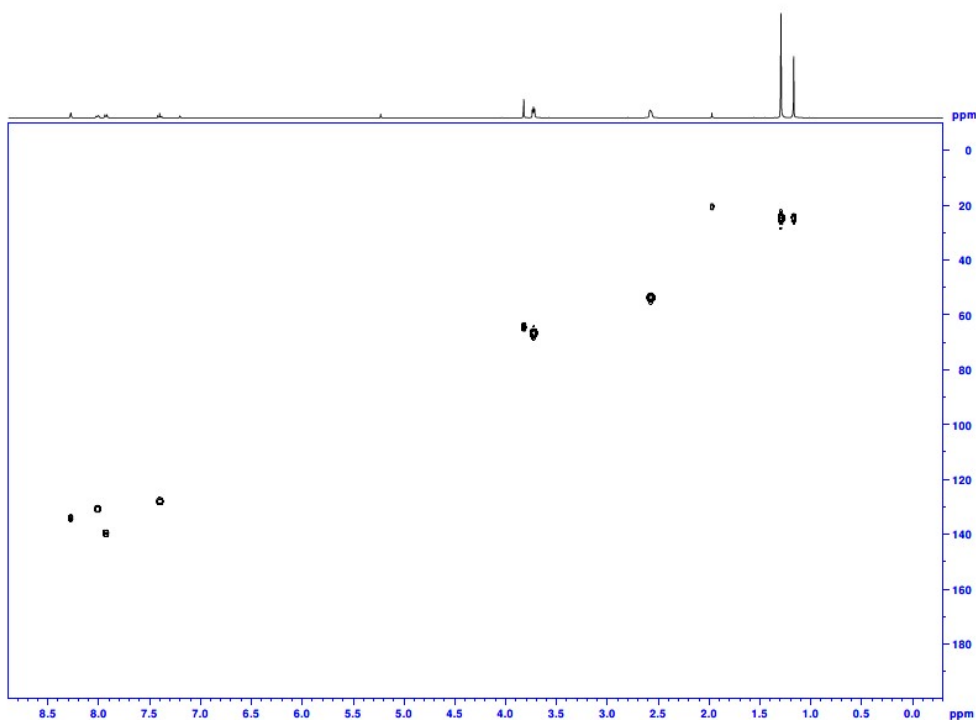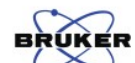

Current Data Parameters  
NAME Oct27-2021  
EXPNO 12  
PROCNO 1

F2 - Acquisition Parameters  
Date\_ 20210227  
Time 8:53 h  
INSTRUM spect  
PROBHD 1HBOA18\_0044  
PULPROG zgpg30  
TD 65536  
SOLVENT CDCl<sub>3</sub>  
NS 1  
DS 4  
SWH 3676.471 Hz  
FIDRES 1.795132 Hz  
AQ 0.2785280 sec  
RG 32.14  
SW 136.000 usec  
TE 298.2 K  
D1 0.00000000 sec  
D11 1.91607987 sec  
D12 0.03000000 sec  
D13 0.00000000 sec  
D16 0.00000000 sec  
DRO 0.00007100 sec  
TDav 1  
SFO1 400.1317515 MHz  
NUC1 1H  
P1 14.00 usec  
P2 14.00 usec  
P3 250.00 usec  
P4 12.92099953 Hz  
P4B2 2.81399988 Hz  
GPRM11 0.00010.100  
GPRM12 0.00010.100  
GPRM13 0.00010.100  
GPRM14 1000.00 usec

F1 - Acquisition parameters  
TD 65536  
SFO1 400.1317515 MHz  
FIDRES 1.795132 Hz  
AQ 0.2785280 sec  
RG 32.14  
SW 136.000 usec  
TE 298.2 K  
D1 0.00000000 sec  
D11 1.91607987 sec  
D12 0.03000000 sec  
D13 0.00000000 sec  
D16 0.00000000 sec  
DRO 0.00007100 sec  
TDav 1  
SFO1 400.1317515 MHz  
NUC1 1H  
P1 14.00 usec  
P2 14.00 usec  
P3 250.00 usec  
P4 12.92099953 Hz  
P4B2 2.81399988 Hz  
GPRM11 0.00010.100  
GPRM12 0.00010.100  
GPRM13 0.00010.100  
GPRM14 1000.00 usec

F2 - Processing parameters  
SI 32768  
SF 400.1300440 MHz  
WDW 0  
SSB 0  
LA 0 Hz  
GB 0  
PC 1.40

F1 - Processing parameters  
SI 32768  
SF 400.1300440 MHz  
WDW 0  
SSB 0  
LA 0 Hz  
GB 0  
PC 1.40

# HMBC (400 MHz, CDCl<sub>3</sub>)

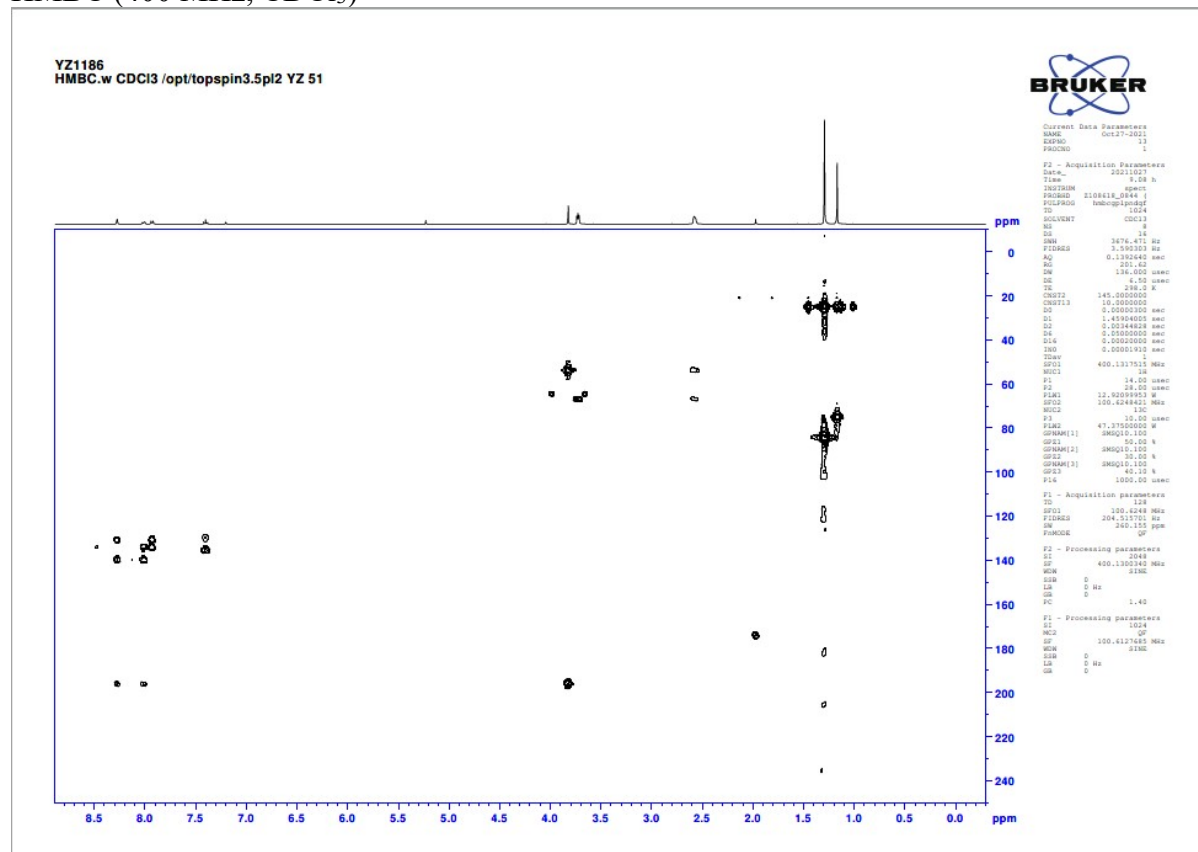

## HPLC of 2-morpholino-1-(3-(4,4,5,5-tetramethyl-1,3,2-dioxaborolan-2-yl)phenyl)ethan-1-one

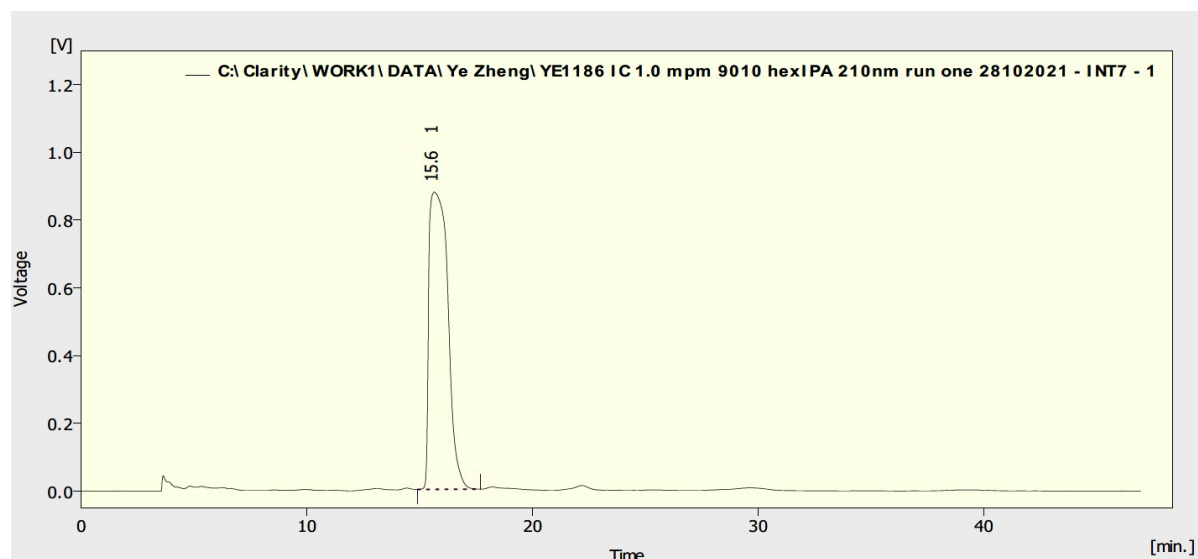

Result Table (Uncal - C:\Clarity\WORK1\DATA\Ye Zheng\YE1186 IC 1.0 mpm 9010 hexIPA 210nm run one 28102021 - INT7 - 1)

|   | Reten. Time<br>[min] | Area<br>[mV.s] | Height<br>[mV] | Area<br>[%] | Height<br>[%] | W05<br>[min] | Compound<br>Name |
|---|----------------------|----------------|----------------|-------------|---------------|--------------|------------------|
| 1 | 15.647               | 50995.875      | 877.576        | 100.0       | 100.0         | 0.94         |                  |
|   | Total                | 50995.875      | 877.576        | 100.0       | 100.0         |              |                  |



Racemic and (*S*)-2-Morpholino-1-(3-(4,4,5,5-tetramethyl-1,3,2-dioxaborolan-2-yl)phenyl)ethan-1-ol **11**.

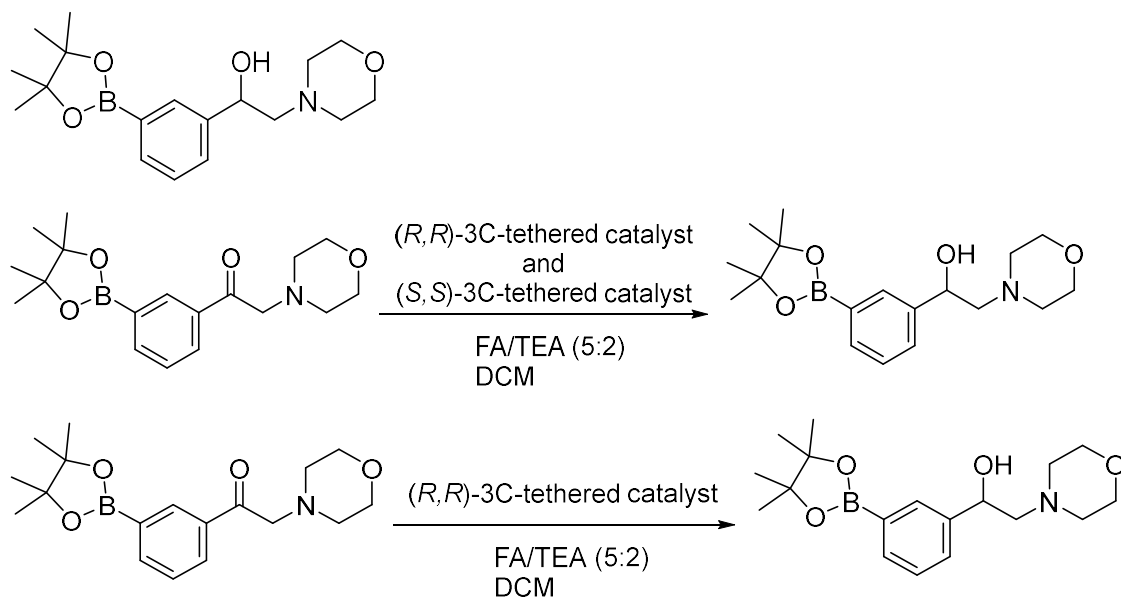

This compound is novel.

#### Synthesis of a racemic standard:

(*R,R*)-3C-Tethered Ru(II)-TsDPEN catalyst **2** (0.75 mg, 1.2  $\mu$ mol, 0.5 mol%) and (*S,S*)-3C-tethered Ru(II)-TsDPEN catalyst **2** (0.75 mg, 1.2  $\mu$ mol, 0.5 mol%) were added to FA: TEA (5:2 azeotropic mixture, 0.36 mL) at rt and the mixture was stirred under a nitrogen atmosphere for 15 minutes; after which a solution of 2-morpholino-1-(3-(4,4,5,5-tetramethyl-1,3,2-dioxaborolan-2-yl)phenyl)ethan-1-one (80.0 mg, 0.242 mmol) in DCM (0.50 mL) was added. The reaction mixture was stirred under a nitrogen atmosphere and followed by TLC (5:95 MeOH: DCM). After 72 hours, the reaction was quenched using saturated NaHCO<sub>3</sub> solution (20 mL). EtOAc (20 mL) was added and the organic layer was separated. The aqueous layer was extracted with EtOAc (3 x 20 mL) and the combined organic layers were dried (MgSO<sub>4</sub>) and filtered. The solvent was removed to give the crude product. The product was isolated via flash chromatography on silica eluted with 0-5% MeOH in DCM to give 2-morpholino-1-(3-(4,4,5,5-tetramethyl-1,3,2-dioxaborolan-2-yl)phenyl)ethan-1-ol **11** as a yellow oil (55.0 mg, 0.165 mmol, 68%). TLC: R<sub>f</sub> ca 0.20 (5:95 MeOH: DCM), strong UV and KMnO<sub>4</sub>; HRMS: (found (ESI<sup>+</sup>): [M+H]<sup>+</sup>, Calcd for C<sub>18</sub>H<sub>29</sub>BNO<sub>4</sub> 334.2180; Found 334.2184; 2.4 ppm error;  $\nu_{\text{max}}$  3422 (br), 3162, 2975, 2859, 1431, 1354, 1139, 1112, 1069, 1006 cm<sup>-1</sup>;  $\delta_{\text{H}}$  (500 MHz, CDCl<sub>3</sub>) 7.76 (1H, s, ArH), 7.73 (1H, d, *J* = 7.5, ArH), 7.52 (1H, d, *J* = 7.5, ArH), 7.36 (1H, t, *J* = 7.5, ArH), 4.78 (1H,

dd,  $J = 10.5, 3.3$ , ArCH), 3.79-3.71 (4H, m, CH<sub>2</sub>), 2.73 (2H, d,  $J = 3.8$ , CH<sub>2</sub>), 2.56-2.45 (4H, m, CH<sub>2</sub>), 1.34 (12H, s, CH<sub>3</sub>) ppm;  $\delta_c$  (125 MHz, CDCl<sub>3</sub>) 141.13 (C), 134.12 (CH), 132.22 (CH), 128.83 (CH), 127.92 (CH), 83.83 (C), 68.58 (CH), 67.07 (CH<sub>2</sub>), 66.64 (CH<sub>2</sub>), 53.44 (CH<sub>2</sub>), 24.88 (CH<sub>3</sub>) ppm;  $m/z$  (ES-API+) 334.2 ( $M^+ + 1$ , 100%). Enantiomeric excess and conversion determined by HPLC analysis (Chiralpak IC, 30 cm x 6mm column, hexane:iPrOH 90:10, 1.0 mL/min,  $T = 25^\circ\text{C}$ ) ketone 15.6 min, *R* and *S* isomers 12.3 min and 21.1 min. Configuration assigned by analogy with **9**.

ATH of 2-morpholino-1-(3-(4,4,5,5-tetramethyl-1,3,2-dioxaborolan-2-yl)phenyl)ethan-1-one:

(*R,R*)-3C-tethered Ru(II)-TsDPEN catalyst **2** (1.50 mg, 2.42  $\mu\text{mol}$ , 1 mol%) was added to FA: TEA (5:2 azeotropic mixture, 0.36 mL) at rt and the mixture was stirred under a nitrogen atmosphere for 15 minutes; after which a solution of 2-morpholino-1-(3-(4,4,5,5-tetramethyl-1,3,2-dioxaborolan-2-yl)phenyl)ethan-1-one (80.0 mg, 0.242 mmol) in DCM (0.50 mL) was added. The reaction mixture was stirred under a nitrogen atmosphere and followed by TLC (5:95 MeOH: DCM). After 72 hours, the reaction was quenched using saturated NaHCO<sub>3</sub> solution (20 mL). EtOAc (20 mL) was added and the organic layer was separated. The aqueous layer was extracted with EtOAc (3 x 20 mL) and the combined organic layers were dried (MgSO<sub>4</sub>) and filtered. The solvent was removed to give the crude product. The product was isolated via flash chromatography on silica eluted with 0-5% MeOH in DCM to give (*S*)-2-morpholino-1-(3-(4,4,5,5-tetramethyl-1,3,2-dioxaborolan-2-yl)phenyl)ethan-1-ol **11** as a yellow oil (45.0 mg, 0.135 mmol, 56%). The reaction was also followed by HPLC (Chiralpak IC, 30 cm x 6mm column, hexane:iPrOH 90:10, 1.0 mL/min,  $T = 25^\circ\text{C}$ ):  $[\alpha]_D^{22} +62.0$  (c 0.300 in CHCl<sub>3</sub>) 93% ee.

<sup>1</sup>H NMR (500 MHz, CDCl<sub>3</sub>)

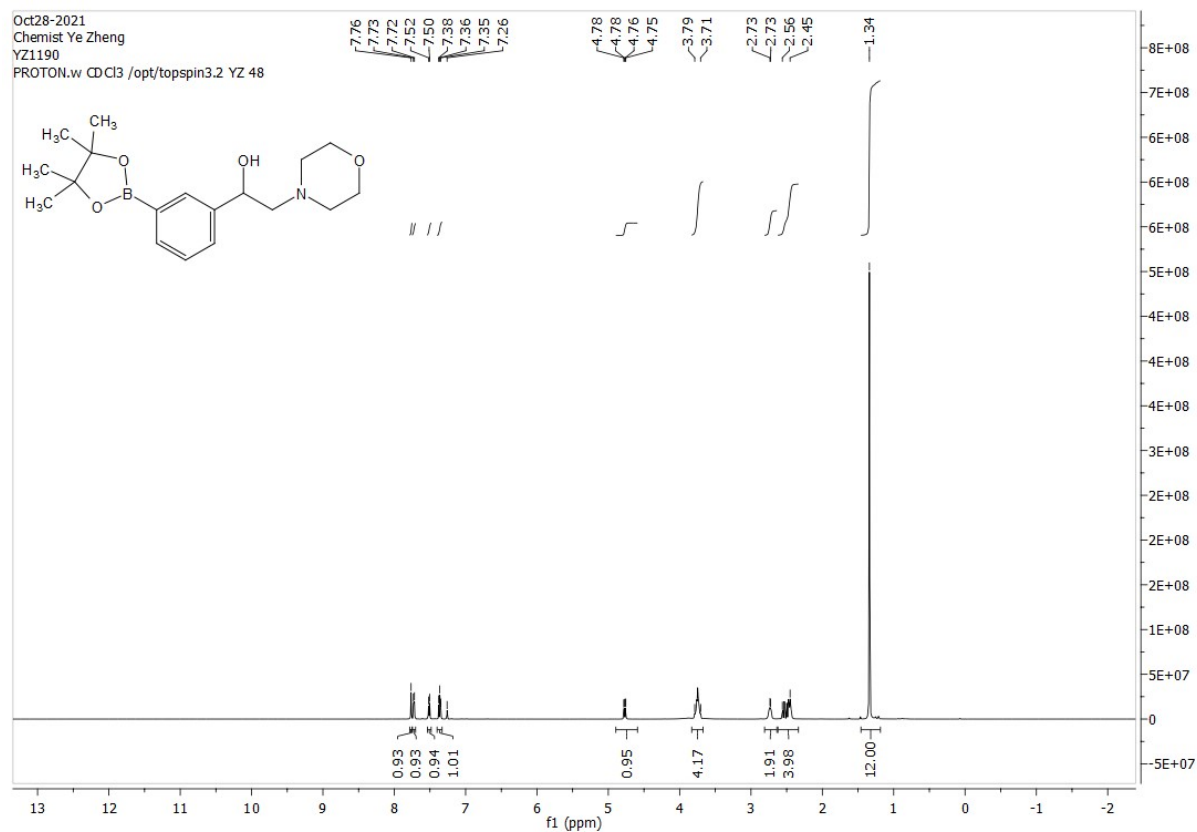

<sup>13</sup>C NMR (125 MHz, CDCl<sub>3</sub>)

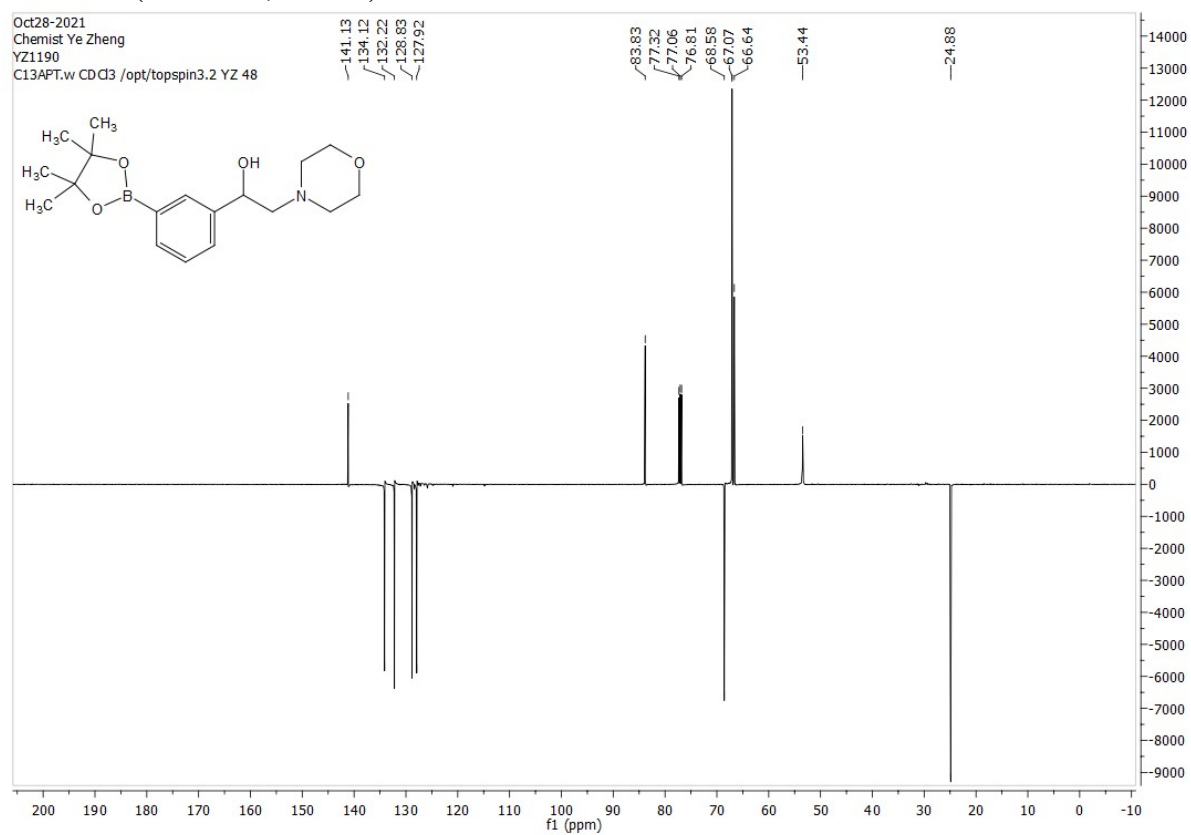

## COSY (500 MHz, CDCl<sub>3</sub>)

Chemist Ye Zheng  
YZ1190  
COSY.w CDCl<sub>3</sub> /opt/topspin3.2 YZ 48

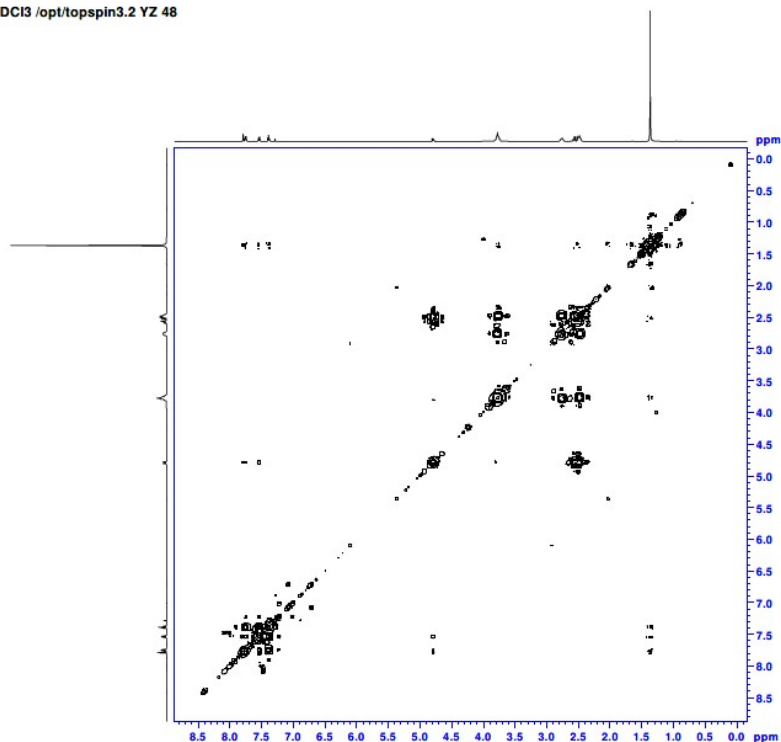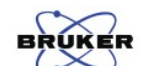

```
Current Data Parameters
NAME      YZ1190
EXPNO     1
PROCNO    1

F2 - Acquisition Parameters
Date_     20210228
Time      17.14
INSTRUM    spect
PROBHD     5 mm CPDPR 13C
PULPROG    zgpg30
TD          65536
SOLVENT    CDCl3
NS          4
DS          4
SWH         4073.544 Hz
FIDRES      0.173244 Hz
AQ          0.2245000 sec
RG          681.82
DE          117.4500 usec
TE          300.2 K
DQ          0.0000000 sec
SI          1.9139344 sec
SFO1        500.132148 MHz
SF          500.132148 MHz
P1          9.10 usec
P2          34.20 usec
P3          0 usec
P4          29.00 usec
P5          0.0000000 sec
P6          0.0000000 sec
P7          0.0000000 sec
P8          0.0000000 sec
P9          0.0000000 sec
P10         1.5004997 sec

===== CHANNEL f1 =====
NUC1        13C
P1          9.10 usec
P2          34.20 usec
P3          0 usec
P4          29.00 usec
P5          0.0000000 sec
P6          0.0000000 sec
P7          0.0000000 sec
P8          0.0000000 sec
P9          0.0000000 sec
P10         1.5004997 sec

===== GRADIENT CHANNEL =====
GPRG1(1)    GPRG1(1) 1000.00 usec
GPRG1(2)    GPRG1(2) 1000.00 usec
GPRG1(3)    GPRG1(3) 1000.00 usec

F1 - Acquisition parameters
SI          1.9139344 sec
SFO1        500.132148 MHz
SF          500.132148 MHz
P1          9.10 usec
P2          34.20 usec
P3          0 usec
P4          29.00 usec
P5          0.0000000 sec
P6          0.0000000 sec
P7          0.0000000 sec
P8          0.0000000 sec
P9          0.0000000 sec
P10         1.5004997 sec

F2 - Processing parameters
SI          1024
SF          500.1300000 MHz
SF2         500.1300000 MHz
WDW         EM
SSB          0 Hz
GB          0
PC          1.40

F1 - Processing parameters
SI          1024
SF          500.1300000 MHz
SF2         500.1300000 MHz
WDW         EM
SSB          0 Hz
GB          0
PC          1.40
```

## HSQC (500 MHz, CDCl<sub>3</sub>)

Chemist Ye Zheng  
YZ1190  
HSQC.w CDCl<sub>3</sub> /opt/topspin3.2 YZ 48

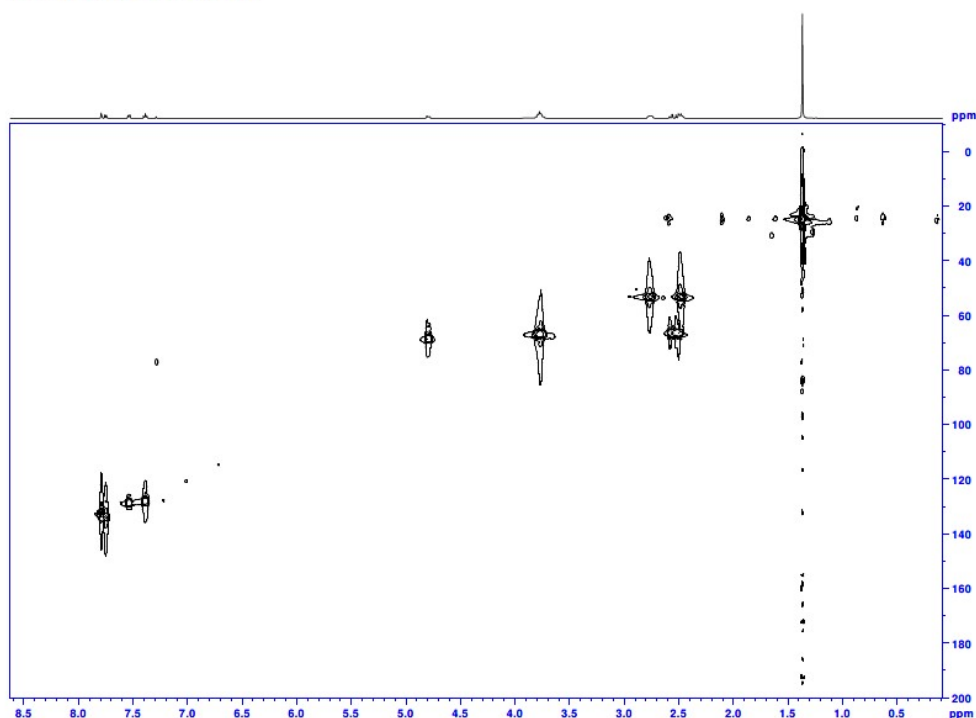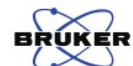

```
Current Data Parameters
NAME      YZ1190
EXPNO     1
PROCNO    1

F2 - Acquisition Parameters
Date_     20210228
Time      17.14
INSTRUM    spect
PROBHD     5 mm CPDPR 13C
PULPROG    zgpg30
TD          65536
SOLVENT    CDCl3
NS          4
DS          4
SWH         4073.544 Hz
FIDRES      0.173244 Hz
AQ          0.2245000 sec
RG          681.82
DE          117.4500 usec
TE          300.2 K
DQ          0.0000000 sec
SI          1.9139344 sec
SFO1        500.132148 MHz
SF          500.132148 MHz
P1          9.10 usec
P2          34.20 usec
P3          0 usec
P4          29.00 usec
P5          0.0000000 sec
P6          0.0000000 sec
P7          0.0000000 sec
P8          0.0000000 sec
P9          0.0000000 sec
P10         1.5004997 sec

===== CHANNEL f1 =====
NUC1        13C
P1          9.10 usec
P2          34.20 usec
P3          0 usec
P4          29.00 usec
P5          0.0000000 sec
P6          0.0000000 sec
P7          0.0000000 sec
P8          0.0000000 sec
P9          0.0000000 sec
P10         1.5004997 sec

===== GRADIENT CHANNEL =====
GPRG1(1)    GPRG1(1) 1000.00 usec
GPRG1(2)    GPRG1(2) 1000.00 usec
GPRG1(3)    GPRG1(3) 1000.00 usec

F1 - Acquisition parameters
SI          1.9139344 sec
SFO1        500.132148 MHz
SF          500.132148 MHz
P1          9.10 usec
P2          34.20 usec
P3          0 usec
P4          29.00 usec
P5          0.0000000 sec
P6          0.0000000 sec
P7          0.0000000 sec
P8          0.0000000 sec
P9          0.0000000 sec
P10         1.5004997 sec

F2 - Processing parameters
SI          1024
SF          500.1300000 MHz
SF2         500.1300000 MHz
WDW         EM
SSB          0 Hz
GB          0
PC          1.40

F1 - Processing parameters
SI          1024
SF          500.1300000 MHz
SF2         500.1300000 MHz
WDW         EM
SSB          0 Hz
GB          0
PC          1.40
```

# HMBC (500 MHz, CDCl<sub>3</sub>)

Chemist Ye Zheng  
YZ1190  
HMBC.w CDCl<sub>3</sub> /opt/topspin3.2 YZ 48

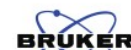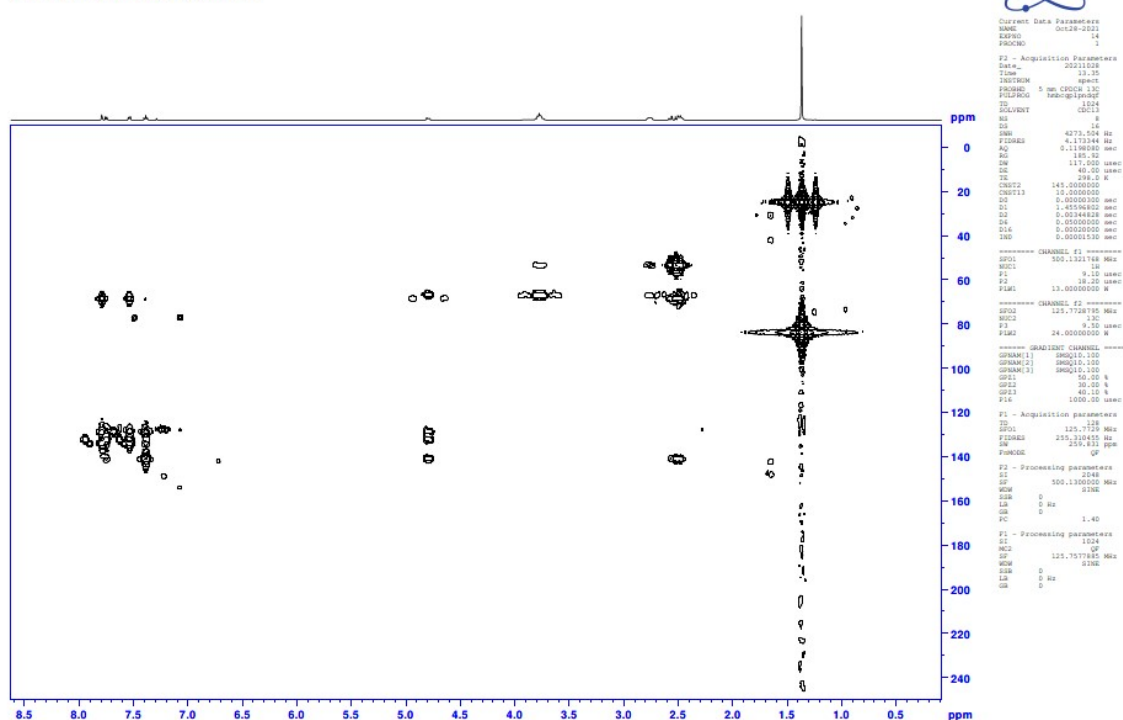

## HPLC of racemic 2-morpholino-1-(3-(4,4,5,5-tetramethyl-1,3,2-dioxaborolan-2-yl)phenyl)ethan-1-ol **11**.

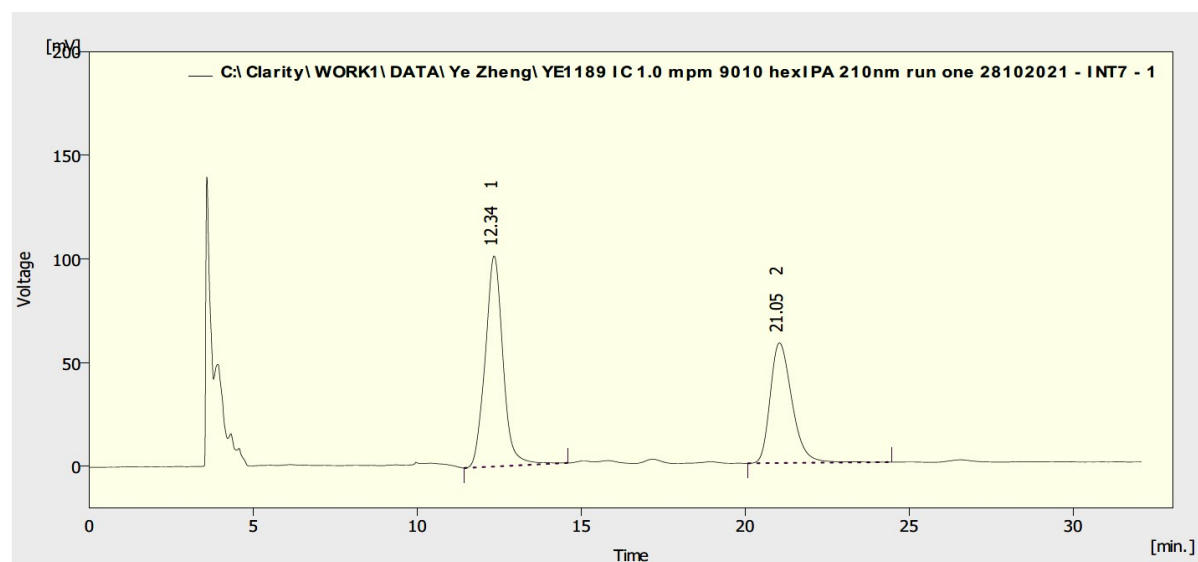

Result Table (Uncal - C:\Clarity\WORK1\DATA\Ye Zheng\YE1189 IC 1.0 mpm 9010 hexIPA 210nm run one 28102021 - INT7 - 1)

|   | Reten. Time<br>[min] | Area<br>[mV.s] | Height<br>[mV] | Area<br>[%] | Height<br>[%] | W05<br>[min] | Compound<br>Name |
|---|----------------------|----------------|----------------|-------------|---------------|--------------|------------------|
| 1 | 12.343               | 3830.213       | 101.638        | 58.8        | 63.7          | 0.56         |                  |
| 2 | 21.047               | 2683.526       | 57.964         | 41.2        | 36.3          | 0.70         |                  |
|   | Total                | 6513.740       | 159.602        | 100.0       | 100.0         |              |                  |

HPLC after ATH of 2-morpholino-1-(3-(4,4,5,5-tetramethyl-1,3,2-dioxaborolan-2-yl)phenyl)ethan-1-one using (*R,R*)-3C-Tethered Ru(II)-TsDPEN catalyst **2** (after 72 hours, 100% conversion, 93% ee).

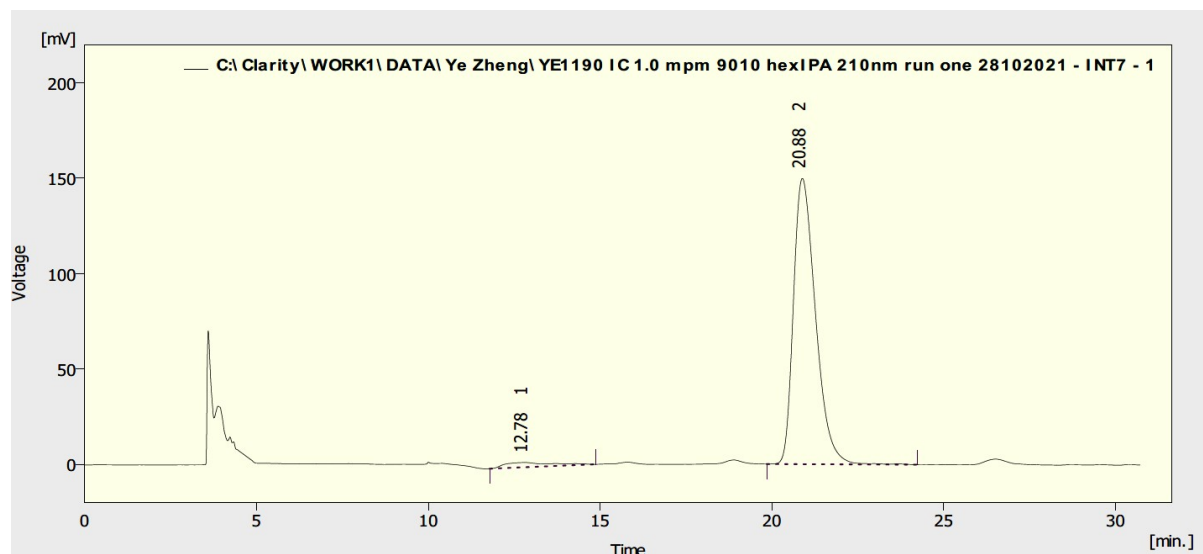

Result Table (Uncal - C:\Clarity\WORK1\DATA\Ye Zheng\YE1190 IC 1.0 mpm 9010 hexIPA 210nm run one 28102021 - INT7 - 1)

|   | Reten. Time<br>[min] | Area<br>[mV.s] | Height<br>[mV] | Area<br>[%] | Height<br>[%] | W05<br>[min] | Compound<br>Name |
|---|----------------------|----------------|----------------|-------------|---------------|--------------|------------------|
| 1 | 12.783               | 242.696        | 2.528          | 3.5         | 1.7           | 2.70         |                  |
| 2 | 20.883               | 6703.125       | 149.862        | 96.5        | 98.3          | 0.69         |                  |
|   | Total                | 6945.821       | 152.390        | 100.0       | 100.0         |              |                  |

1-(4-Bromophenyl)-2-phenoxyethan-1-one.

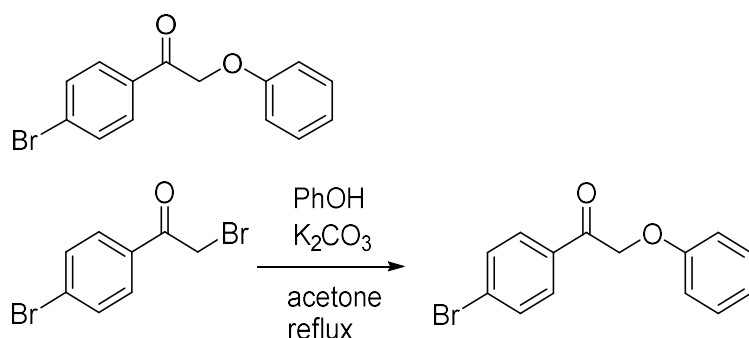

This compound has been reported and fully characterized. Reference: K. Gao, M. Xu, C. Cai, Y. Ding, J. Chen, B. Liu, Y. Xia, *Org. Lett.* 2020, **22**, 6055-6060.

A round-bottom flask was charged with 2,4'-dibromoacetophenone (834 mg, 3.00 mmol), potassium carbonate (414 mg, 3.00 mmol), phenol (282 mg, 3.00 mmol) and acetone (2 mL). The reaction mixture was heated to reflux and left stirring under the nitrogen atmosphere overnight, followed by TLC (9:1 hexane: EtOAc). The mixture was quenched by distilled water (20 mL). EtOAc (20 mL) was added and the organic layer was separated. The aqueous layer was extracted with EtOAc (3 × 20 mL), and the combined organic layers were dried (MgSO<sub>4</sub>) and filtered. Solvent was removed to give the crude product. The product was isolated via flash chromatography on silica eluted with 0-10% ethyl acetate in hexane to give 1-(4-bromophenyl)-2-phenoxyethan-1-one as a yellow solid (534 mg, 1.84 mmol, 61%).

TLC: R<sub>f</sub> ca 0.50 (9:1 hexane: EtOAc), strong UV and KMnO<sub>4</sub>; δ<sub>H</sub> (400 MHz, CDCl<sub>3</sub>) 7.88 (2H, d, *J* = 8.5, ArH), 7.64 (2H, d, *J* = 8.5, ArH), 7.28 (2H, dd, *J* = 13.5, 6.1, ArH), 6.99 (1H, t, *J* = 7.3, ArH), 6.93 (2H, d, *J* = 8.5, ArH), 5.19 (2H, s, CH<sub>2</sub>) ppm; δ<sub>C</sub> (100 MHz, CDCl<sub>3</sub>) 194.00 (C), 157.85 (C), 133.33 (C), 132.18 (CH), 129.81 (CH), 129.67 (CH), 129.15 (C), 121.85 (CH), 114.78 (CH), 70.91 (CH<sub>2</sub>) ppm; *m/z* (ES-API<sup>+</sup>) 313.0 (M<sup>+</sup> + 23, 100%). Data matched that reported.

$^1\text{H}$  NMR (400 MHz,  $\text{CDCl}_3$ )

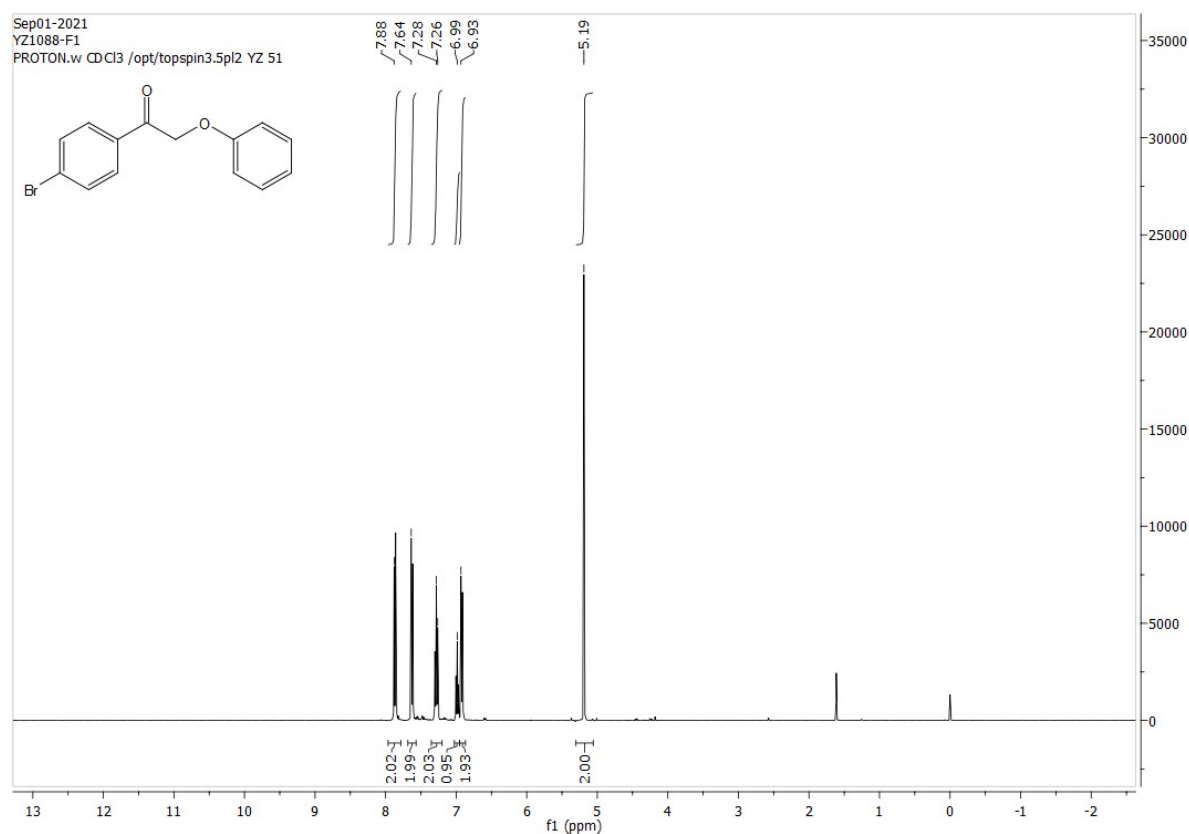

$^{13}\text{C}$  NMR (100 MHz,  $\text{CDCl}_3$ )

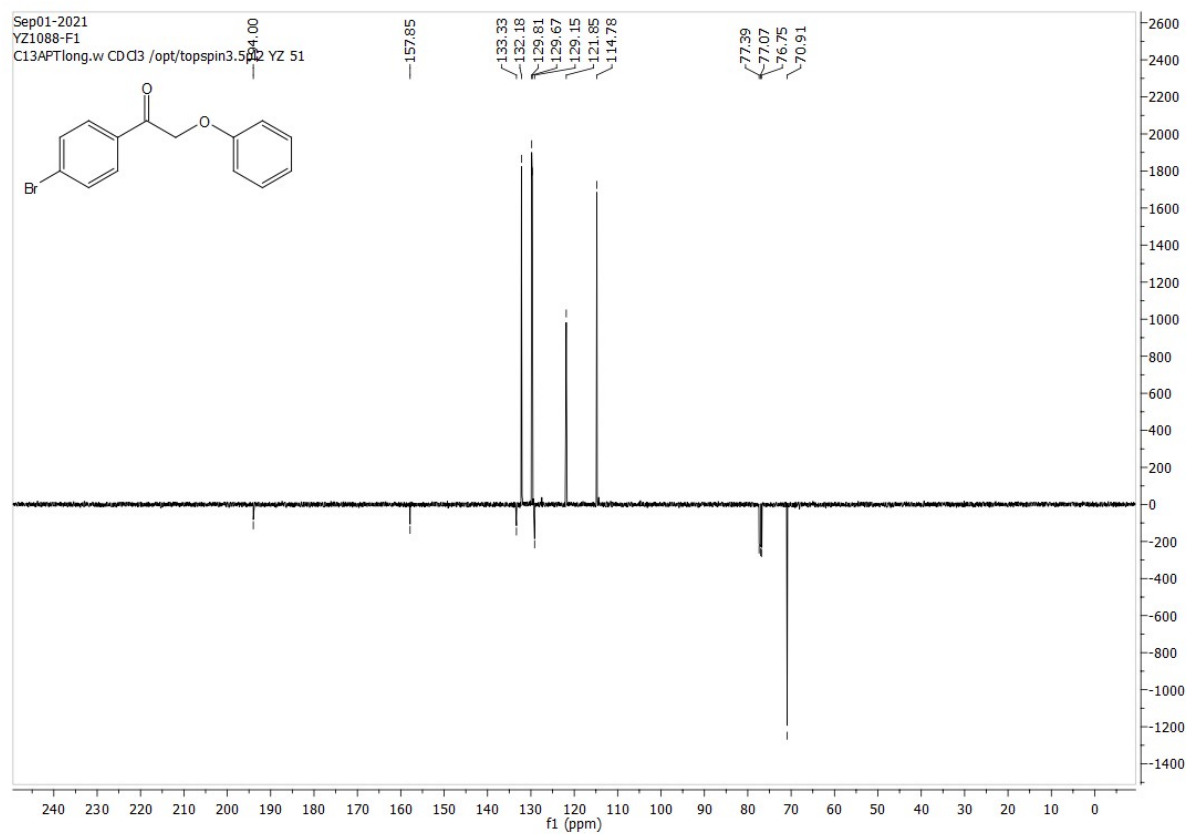



2-Phenoxy-1-(4-(4,4,5,5-tetramethyl-1,3,2-dioxaborolan-2-yl)phenyl)ethan-1-one.

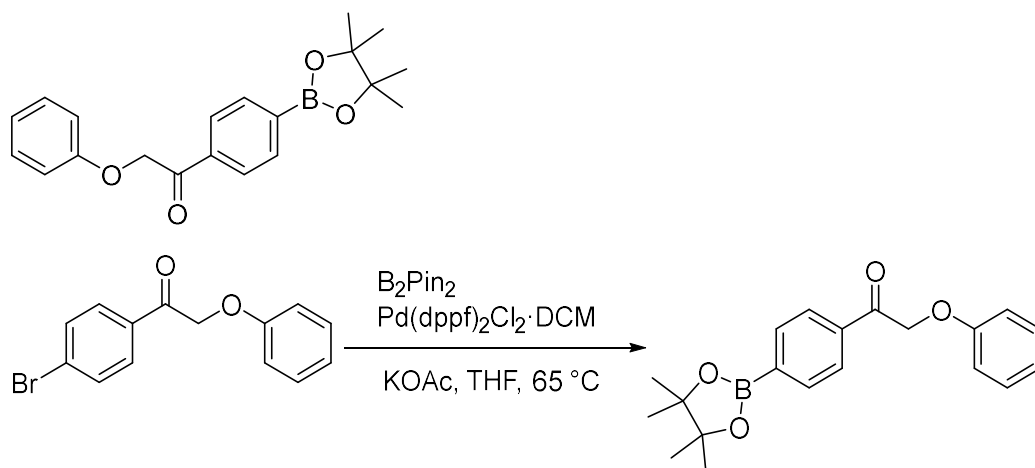

This compound is novel.

A round-bottom flask was charged with 1-(4-bromophenyl)-2-phenoxyethan-1-one (860 mg, 2.97 mmol), bis(pinacolato)diboron (904 mg, 3.56 mmol), potassium acetate (873 mg, 8.91 mmol), THF (15 mL) and  $\text{Pd}(\text{dppf})_2\text{Cl}_2 \cdot \text{DCM}$  (122 mg, 0.149 mmol). The reaction mixture was heated to  $65^\circ\text{C}$  and left stirring under the nitrogen atmosphere overnight, followed by TLC (9:1 hexane: EtOAc). The mixture was quenched by distilled water (20 mL). EtOAc (20 mL) was added and the organic layer was separated. The aqueous layer was extracted with EtOAc ( $3 \times 20$  mL), and the combined organic layers were dried ( $\text{MgSO}_4$ ) and filtered. Solvent was removed to give the crude product. The product was isolated via flash chromatography on silica eluted with 0-20% ethyl acetate in hexane to give 2-phenoxy-1-(4-(4,4,5,5-tetramethyl-1,3,2-dioxaborolan-2-yl)phenyl)ethan-1-one as a yellow oil (830 mg, 2.46 mmol, 83%). TLC:  $R_f$  ca 0.40 (9:1 hexane: EtOAc), strong UV and  $\text{KMnO}_4$ ; HRMS: (found (ESI<sup>+</sup>):  $[\text{M}+\text{H}]^+$ , Calcd for  $\text{C}_{20}\text{H}_{23}\text{BNaO}_4$  361.1577; Found 361.1582; 2.2 ppm error;  $\nu_{\text{max}}$  2978, 2931, 1704, 1599, 1495, 1356, 1303, 1211, 1142, 1122, 1086, 961  $\text{cm}^{-1}$ ;  $\delta_{\text{H}}$  (400 MHz,  $\text{CDCl}_3$ ) 7.98 (2H, d,  $J = 7.9$ , ArH), 7.93 (2H, d,  $J = 7.9$ , ArH), 7.30-7.26 (2H, m, ArH), 7.00-6.93 (3H, m, ArH), 5.27 (2H, s,  $\text{CH}_2$ ), 1.36 (12H, s,  $\text{CH}_3$ ) ppm;  $\delta_{\text{C}}$  (100 MHz,  $\text{CDCl}_3$ ) 194.90 (C), 158.00 (C), 136.46 (C), 135.09 (CH), 129.59 (CH), 127.09 (CH), 121.68 (CH), 114.86 (CH), 84.32 (C), 70.92 ( $\text{CH}_2$ ), 24.89 ( $\text{CH}_3$ ) ppm;  $m/z$  (ES-API<sup>+</sup>) 361.1 ( $\text{M}^+ + 23$ , 100%).

Enantiomeric excess and conversion determined by HPLC analysis (Chiralcel ODH, 30 cm x 6mm column, hexane:iPrOH 95:5, 1.0 mL/min,  $T = 25^\circ\text{C}$ ) ketone 16.6 min, *R* isomer 18.0 min and *S* isomers 30.7 min.

$^1\text{H}$  NMR (400 MHz,  $\text{CDCl}_3$ )

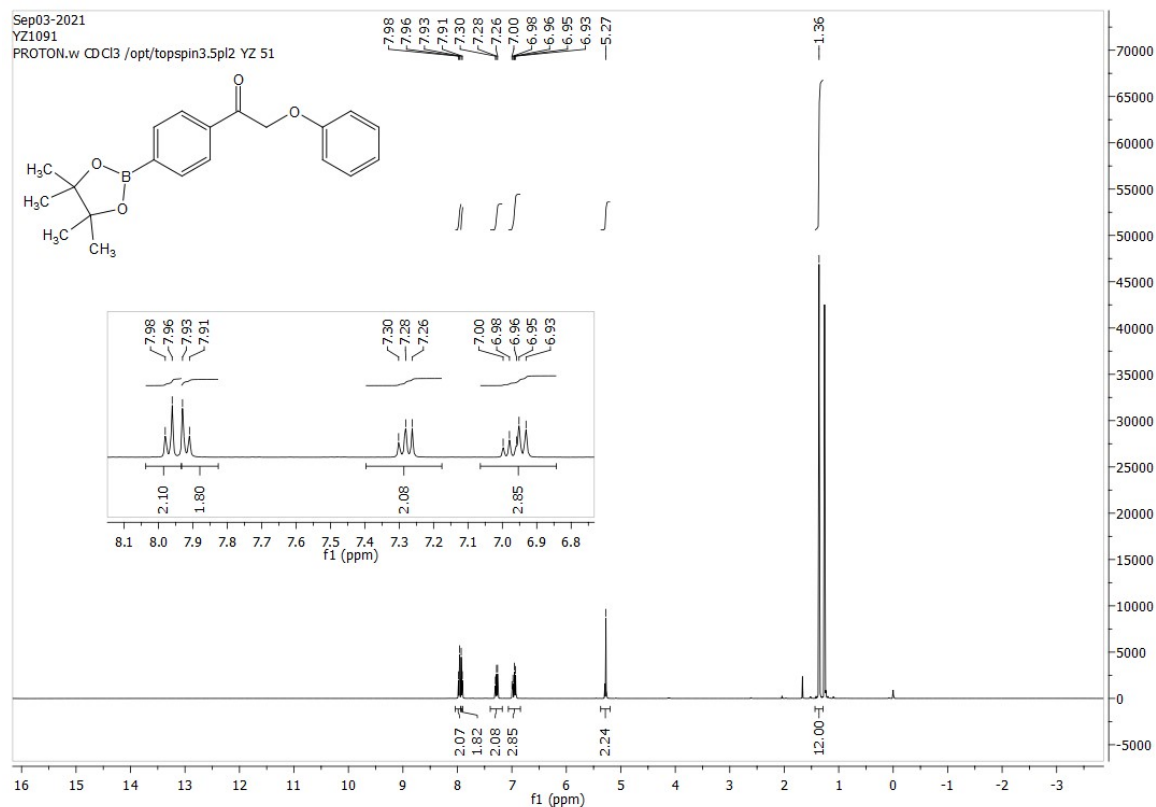

$^{13}\text{C}$  NMR (100 MHz,  $\text{CDCl}_3$ )

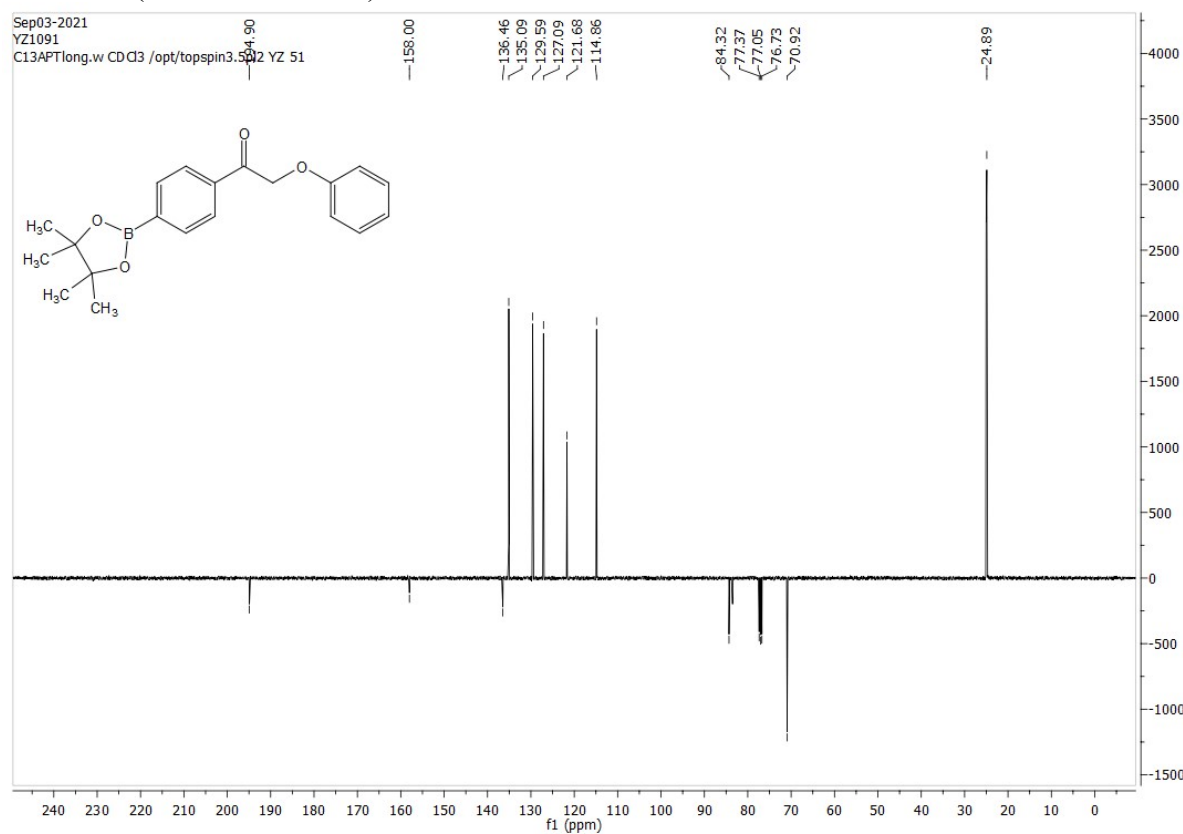

COSY (400 MHz,  $\text{CDCl}_3$ )



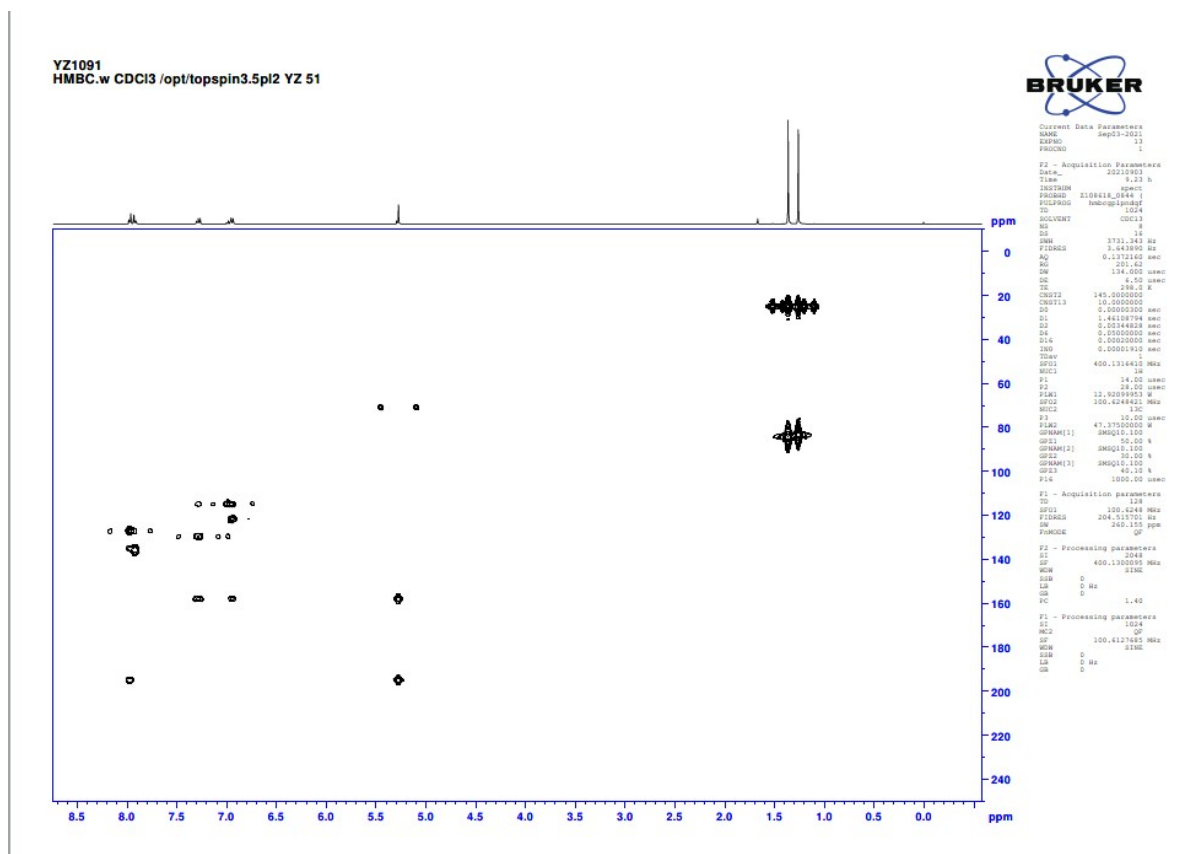

HPLC of 2-phenoxy-1-(4-(4,4,5,5-tetramethyl-1,3,2-dioxaborolan-2-yl)phenyl)ethan-1-one

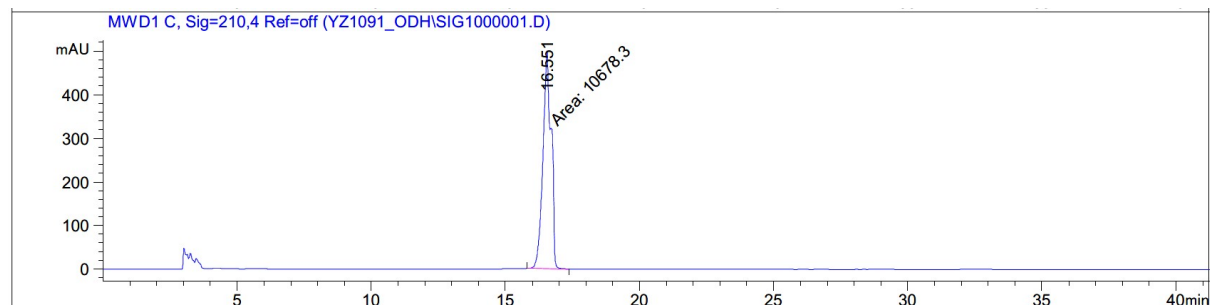

Signal 2: MWD1 C, Sig=210,4 Ref=off

| Peak # | RetTime [min] | Type | Width [min] | Area [mAU*s] | Height [mAU] | Area %   |
|--------|---------------|------|-------------|--------------|--------------|----------|
| 1      | 16.551        | MM   | 0.3566      | 1.06783e4    | 499.12787    | 100.0000 |

Totals : 1.06783e4 499.12787

Racemic and (*S*)-2-phenoxy-1-(4-(4,4,5,5-tetramethyl-1,3,2-dioxaborolan-2-yl)phenyl)ethan-1-ol **12**.

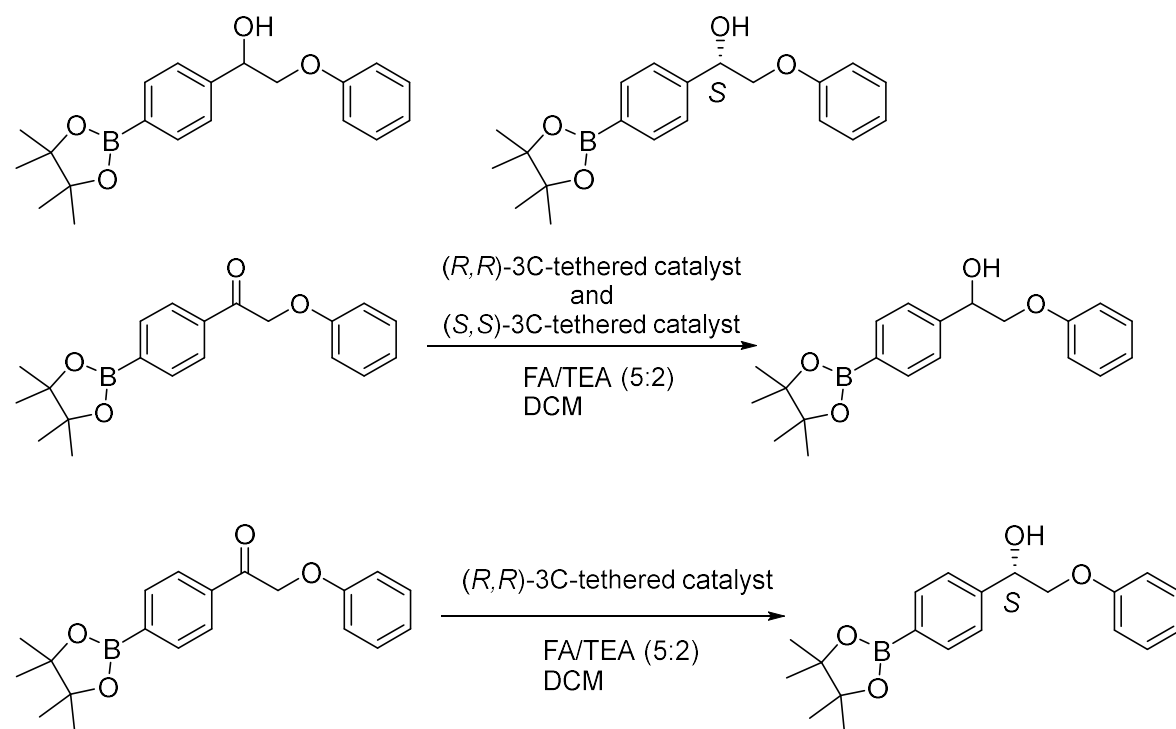

This compound is novel.

#### Synthesis of a racemic standard:

(*R,R*)-3C-Tethered Ru(II)-TsDPEN catalyst **2** (1.1 mg, 1.8  $\mu$ mol, 0.5 mol%) and (*S,S*)-3C-tethered Ru(II)-TsDPEN catalyst **2** (1.1 mg, 1.8  $\mu$ mol, 0.5 mol%) were added to FA: TEA (5:2 azeotropic mixture, 0.54 mL) at rt and the mixture was stirred under a nitrogen atmosphere for 15 minutes, after which a solution of 2-phenoxy-1-(4-(4,4,5,5-tetramethyl-1,3,2-dioxaborolan-2-yl)phenyl)ethan-1-one (120 mg, 0.355 mmol) in DCM (0.75 mL) was added. The reaction mixture was stirred under a nitrogen atmosphere and followed by TLC (4:1 hexane: EtOAc). After 72 hours, the reaction was quenched using saturated NaHCO<sub>3</sub> solution (20 mL). EtOAc (20 mL) was added and the organic layer was separated. The aqueous layer was extracted with EtOAc (3 x 20 mL) and the combined organic layers were dried (MgSO<sub>4</sub>) and filtered. The solvent was removed to give the crude product. The product was isolated via flash chromatography on silica eluted with 0-20% EtOAc in hexane to give 2-phenoxy-1-(4-(4,4,5,5-tetramethyl-1,3,2-dioxaborolan-2-yl)phenyl)ethan-1-ol **12** as a colorless oil (60.0 mg, 0.176 mmol, 50%). TLC: R<sub>f</sub> ca 0.20 (4:1 hexane: EtOAc), strong UV and KMnO<sub>4</sub>; HRMS: (found (ESI<sup>+</sup>): [M+H]<sup>+</sup>, Calcd for C<sub>20</sub>H<sub>25</sub>BNaO<sub>4</sub> 363.1741; Found 363.1738; 0.3 ppm error;  $\nu_{\text{max}}$  3461 (br), 2977, 2928, 1599, 1495,

1397, 1357, 1241, 1141, 1086, 1019, 731  $\text{cm}^{-1}$ ;  $\delta_{\text{H}}$  (400 MHz,  $\text{CDCl}_3$ ) 7.85 (2H, d,  $J = 7.8$ , ArH), 7.46 (2H, d,  $J = 7.8$ , ArH), 7.27 (2H, t,  $J = 7.8$ , ArH), 6.96 (1H, t,  $J = 7.3$ , ArH), 6.91 (2H, d,  $J = 8.3$ , ArH), 5.13 (1H, dd,  $J = 6.1, 2.6$ , ArCH), 4.10 (1H, dd,  $J = 9.6, 3.1$ ,  $\text{CH}_2$ ), 3.99 (1H, t,  $J = 9.2$ ,  $\text{CH}_2$ ), 2.87 (1H, d,  $J = 2.6$ , OH), 1.34 (12H, s,  $\text{CH}_3$ ) ppm;  $\delta_{\text{C}}$  (100 MHz,  $\text{CDCl}_3$ ) 158.39 (C), 142.77 (C), 135.06 (CH), 129.58 (CH), 125.58 (CH), 121.34 (CH), 114.68 (CH), 83.89 (C), 72.24 ( $\text{CH}_2$ ), 72.61 (CH), 24.89 ( $\text{CH}_3$ ) ppm;  $m/z$  (ES-API+) 363.2 ( $\text{M}^+ + 23$ , 100%).

Enantiomeric excess and conversion determined by HPLC analysis (Chiralcel ODH, 30 cm x 6mm column, hexane:iPrOH 95:5, 1.0 mL/min,  $T = 25^\circ\text{C}$ ) ketone 16.6 min, *R* isomer 18.0 min and *S* isomers 30.7 min..

ATH of 2-phenoxy-1-(4-(4,4,5,5-tetramethyl-1,3,2-dioxaborolan-2-yl)phenyl)ethan-1-one:

(*R,R*)-3C-tethered Ru(II)-TsDPEN catalyst **2** (2.2 mg, 3.6  $\mu\text{mol}$ , 1 mol%) was added to FA: TEA (5:2 azeotropic mixture, 0.54 mL) at rt and the mixture was stirred under a nitrogen atmosphere for 15 minutes; after which a solution of 2-phenoxy-1-(4-(4,4,5,5-tetramethyl-1,3,2-dioxaborolan-2-yl)phenyl)ethan-1-one (120 mg, 0.355 mmol) in DCM (0.75 mL) was added. The reaction mixture was stirred under a nitrogen atmosphere and followed by TLC (4:1 hexane: EtOAc). After 72 hours, the reaction was quenched using saturated  $\text{NaHCO}_3$  solution (20 mL). EtOAc (20 mL) was added and the organic layer was separated. The aqueous layer was extracted with EtOAc (3 x 20 mL) and the combined organic layers were dried ( $\text{MgSO}_4$ ) and filtered. The solvent was removed to give the crude product. The product was isolated via flash chromatography on silica eluted with 0-50% EtOAc in hexane to give (*S*)-2-phenoxy-1-(4-(4,4,5,5-tetramethyl-1,3,2-dioxaborolan-2-yl)phenyl)ethan-1-ol **12** as a colorless oil (61.0 mg, 0.179 mmol, 51%). The reaction was also followed by HPLC (Chiralcel ODH, 30 cm x 6mm column, hexane:iPrOH 95:5, 1.0 mL/min,  $T = 25^\circ\text{C}$ ):  $[\alpha]_{\text{D}}^{26} +31.3$  (c 0.408 in  $\text{CHCl}_3$ ) 97% ee (*S* configuration, confirmed by methylation, as described below).

<sup>1</sup>H NMR (400 MHz, CDCl<sub>3</sub>)

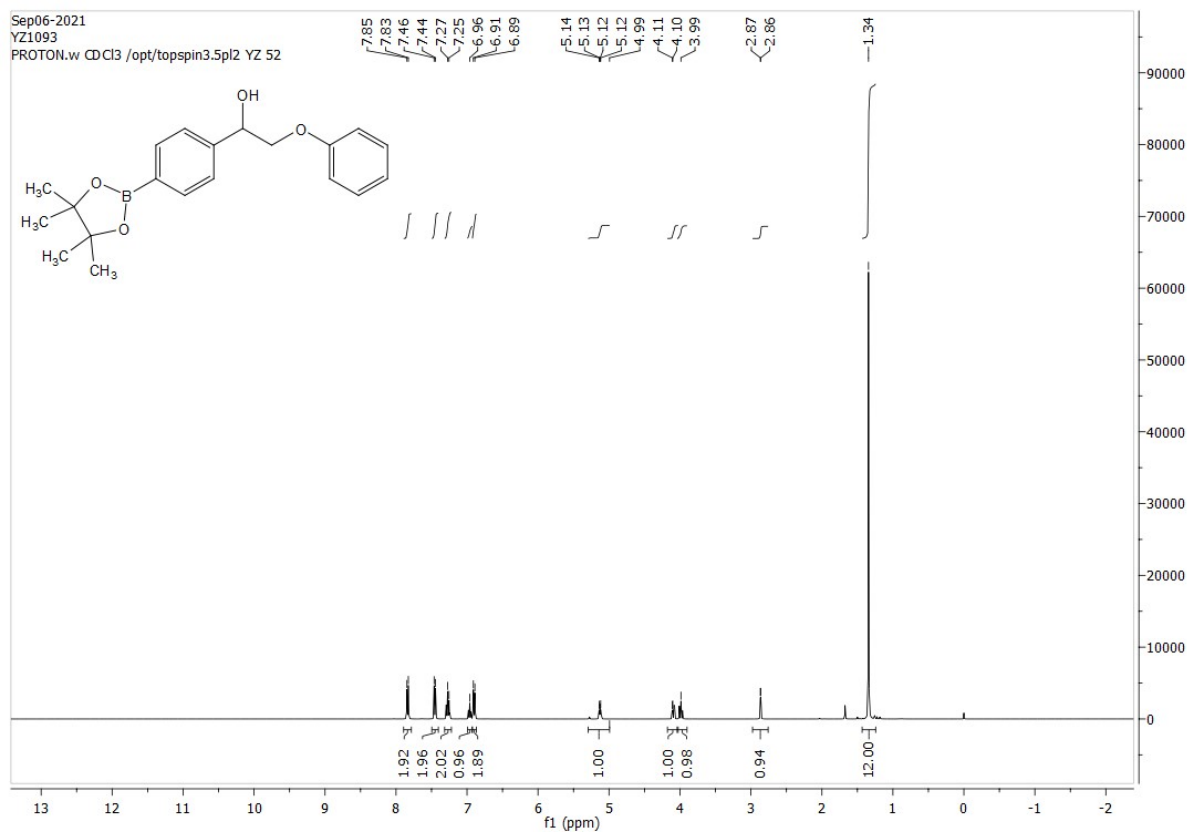

<sup>13</sup>C NMR (100 MHz, CDCl<sub>3</sub>)

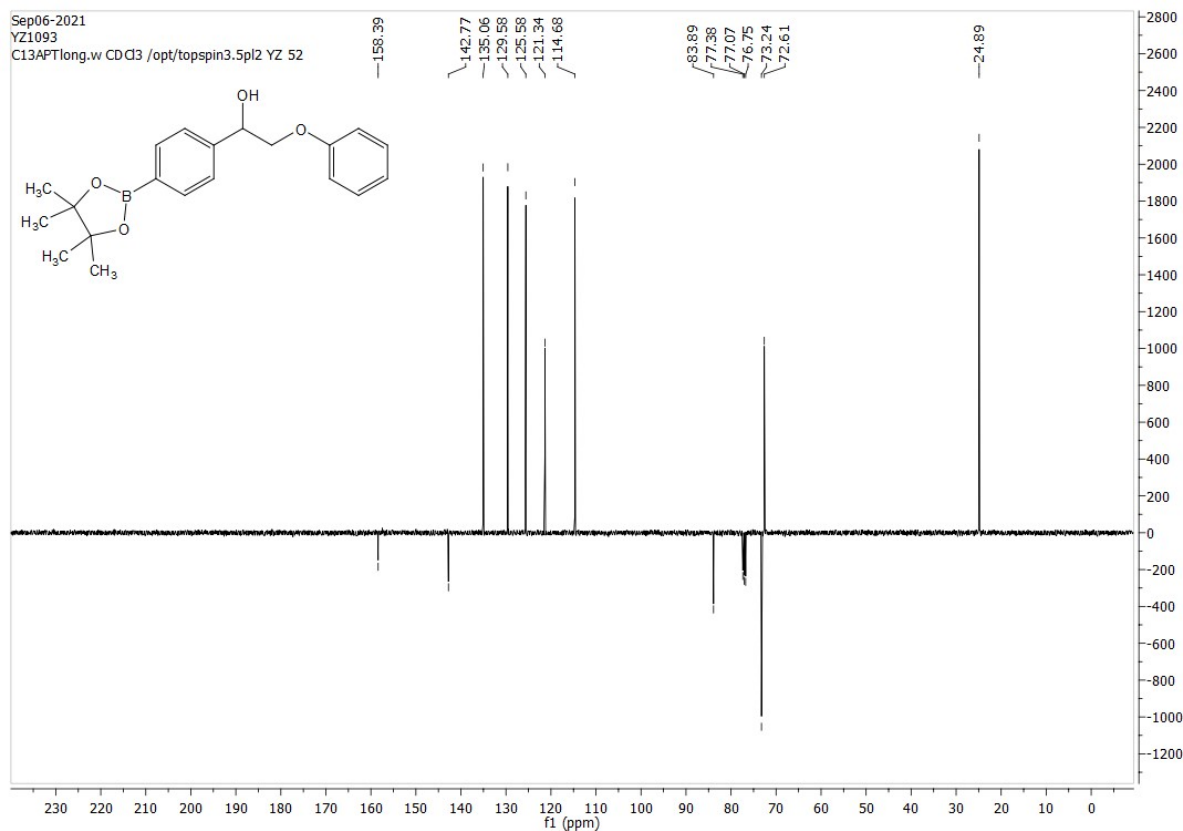

## COSY (400 MHz, CDCl<sub>3</sub>)

YZ1093  
COSY.w CDCl<sub>3</sub> /opt/topspin3.5pl2 YZ 52

YE1094 ODH 1.0 mpm 9505 hexIPA run one 06092021.pdf

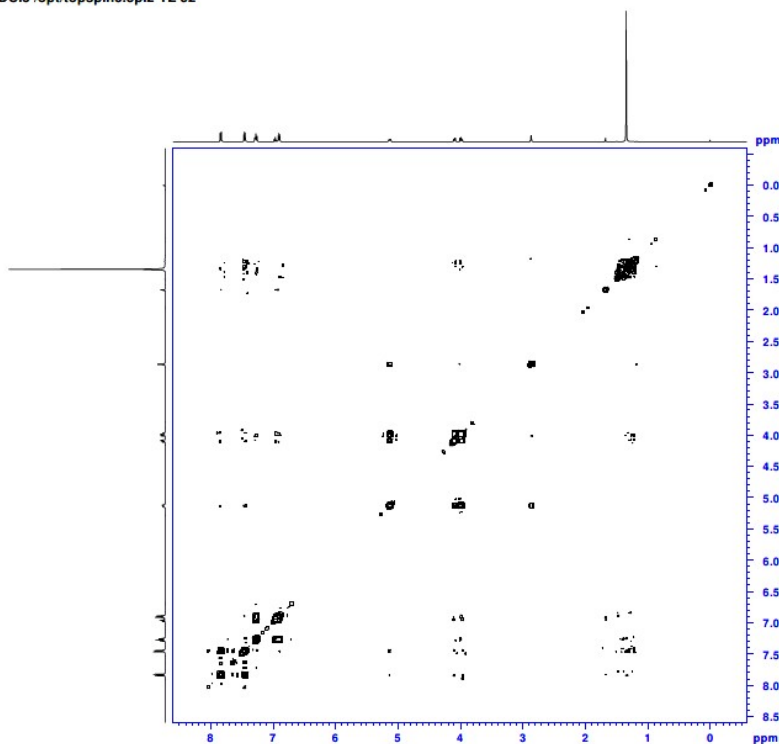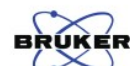

Current Data Parameters  
NAME Sep04-2021  
EXPNO 22  
PROCNO 1

F2 - Acquisition Parameters  
Date\_ 20210904  
Time 10:15 h  
INSTRUM spect  
PROBHD 1H/13C/15N  
PULPROG zgpg30  
SOLVENT CDCl<sub>3</sub>  
NS 4  
DS 4  
SWH 3676.471 Hz  
FIDRES 1.795152 Hz  
AQ 0.1785280 sec  
RG 32.14  
AQ 136.000 usec  
DE 6.50 usec  
TE 298.2 K  
D0 0.0000000 sec  
D1 1.9187895 sec  
D11 0.0000000 sec  
D12 0.0000000 sec  
D13 0.0000000 sec  
D16 0.0000000 sec  
DRO 0.0000000 sec  
TDav 1  
SFO1 400.1314194 MHz  
NUC1 13  
P1 14.00 usec  
P2 14.00 usec  
P3 2500.00 usec  
P4 12.9209953 M  
P5 2.9239988 M  
P6 10.00 %  
P7 10.00 %  
P8 1000.00 usec  
P9 1.40

F1 - Acquisition parameters  
TD 128  
SFO1 400.1314 MHz  
FIDRES 29.122417 Hz  
SW 9.188 ppm  
FWDDE 0

F2 - Processing parameters  
SI 324  
SF 400.1305170 MHz  
WDW 0  
SSB 0  
LB 0 Hz  
GB 0  
PC 1.40

F1 - Processing parameters  
SI 1024  
SF 400.1305170 MHz  
WDW 0  
SSB 0  
LB 0 Hz  
GB 0  
PC 1.40

## HSQC (400 MHz, CDCl<sub>3</sub>)

YZ1093  
HSQC.w CDCl<sub>3</sub> /opt/topspin3.5pl2 YZ 52

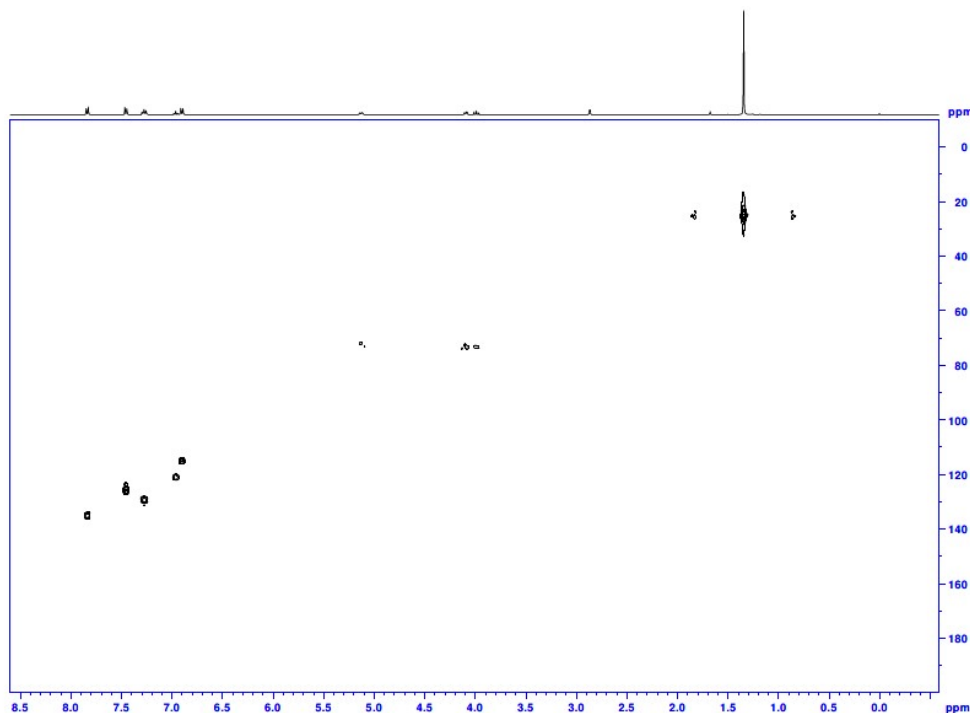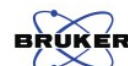

Current Data Parameters  
NAME Sep04-2021  
EXPNO 22  
PROCNO 1

F2 - Acquisition Parameters  
Date\_ 20210904  
Time 10:15 h  
INSTRUM spect  
PROBHD 1H/13C/15N  
PULPROG zgpg30  
SOLVENT CDCl<sub>3</sub>  
NS 4  
DS 4  
SWH 3676.471 Hz  
FIDRES 1.795152 Hz  
AQ 0.1785280 sec  
RG 32.14  
AQ 136.000 usec  
DE 6.50 usec  
TE 298.2 K  
D0 0.0000000 sec  
D1 1.9187895 sec  
D11 0.0000000 sec  
D12 0.0000000 sec  
D13 0.0000000 sec  
D16 0.0000000 sec  
DRO 0.0000000 sec  
TDav 1  
SFO1 400.1314194 MHz  
NUC1 13  
P1 14.00 usec  
P2 14.00 usec  
P3 2500.00 usec  
P4 12.9209953 M  
P5 2.9239988 M  
P6 10.00 %  
P7 10.00 %  
P8 1000.00 usec  
P9 1.40

F1 - Acquisition parameters  
TD 128  
SFO1 400.1314 MHz  
FIDRES 29.122417 Hz  
SW 9.188 ppm  
FWDDE 0

F2 - Processing parameters  
SI 324  
SF 400.1305170 MHz  
WDW 0  
SSB 0  
LB 0 Hz  
GB 0  
PC 1.40

F1 - Processing parameters  
SI 1024  
SF 400.1305170 MHz  
WDW 0  
SSB 0  
LB 0 Hz  
GB 0  
PC 1.40





HPLC after ATH of 2-phenoxy-1-(4-(4,4,5,5-tetramethyl-1,3,2-dioxaborolan-2-yl)phenyl)ethan-1-one using ((*R,R*)-3C-Tethered Ru(II)-TsDPEN catalyst **2** (after 72 hours, 100% conversion, 97% ee, *S* configuration).

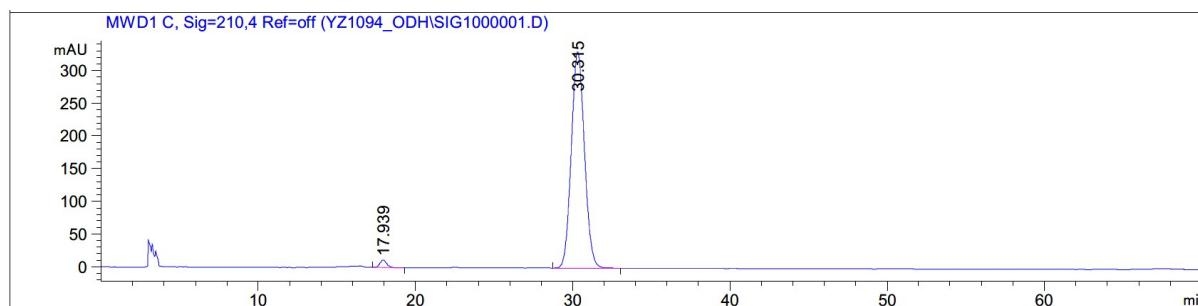

Signal 2: MWD1 C, Sig=210,4 Ref=off

| Peak # | RetTime [min] | Type | Width [min] | Area [mAU*s] | Height [mAU] | Area %  |
|--------|---------------|------|-------------|--------------|--------------|---------|
| 1      | 17.939        | BB   | 0.4509      | 339.09100    | 11.27375     | 1.7322  |
| 2      | 30.315        | BB   | 0.9045      | 1.92372e4    | 330.79166    | 98.2678 |

Totals : 1.95763e4 342.06540

2-Phenoxy-1-(*p*-tolyl)ethan-1-one **20**.

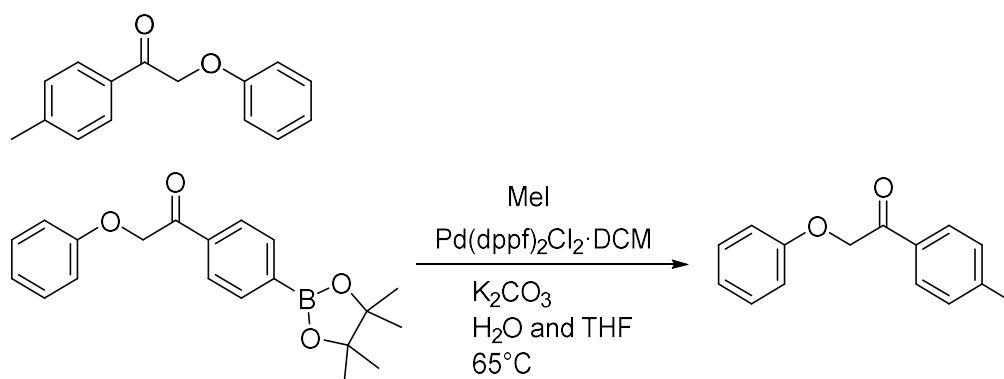

This compound has been reported and fully characterized: Y. Zhou, G. E. Klinger, E. L. Hegg, C. M. Saffron, J. E. Jackson, *J. Am. Chem. Soc.* 2020, **142**, 4037-4050.

To a solution of 2-phenoxy-1-(4-(4,4,5,5-tetramethyl-1,3,2-dioxaborolan-2-yl)phenyl)ethan-1-one (680 mg, 2.00 mmol), iodomethane (568 mg, 4.00 mmol) and potassium carbonate (552 mg, 4.00 mmol) in THF (38 mL) was added Pd(dppf)<sub>2</sub>Cl<sub>2</sub>·DCM (81.7 mg, 0.100 mmol) and distilled water (0.258 mL). The reaction mixture was heated to 65 °C and left stirring under the nitrogen atmosphere overnight, followed by TLC (9:1 hexane: EtOAc). The mixture was quenched by distilled water (20 mL). EtOAc (20 mL) was added and the organic layer was separated. The aqueous layer was extracted with EtOAc (3 × 20 mL), and the combined organic layers were dried (MgSO<sub>4</sub>) and filtered. Solvent was removed to give the crude product. The product was isolated via flash chromatography on silica eluted with 0-10% ethyl acetate in hexane to give 2-phenoxy-1-(*p*-tolyl)ethan-1-one **20** as a white solid (118 mg, 0.522 mmol, 26%). TLC: R<sub>f</sub> ca 0.50 (9:1 hexane: EtOAc), strong UV and KMnO<sub>4</sub>; δ<sub>H</sub> (400 MHz, CDCl<sub>3</sub>) 7.84 (2H, d, *J* = 8.2, ArH), 7.22-7.17 (4H, m, ArH), 6.02-6.85 (3H, m, ArH), 5.16 (2H, s, CH<sub>2</sub>), 2.34 (3H, s, CH<sub>3</sub>) ppm; δ<sub>C</sub> (100 MHz, CDCl<sub>3</sub>) 194.17 (C), 158.10 (C), 144.85 (C), 132.15 (C), 129.58 (CH), 129.53 (CH), 128.28 (CH), 121.61 (CH), 114.84 (CH), 70.77 (CH<sub>2</sub>), 21.19 (CH<sub>3</sub>) ppm; *m/z* (ES-API<sup>+</sup>) 249.1 (M<sup>+</sup> + 1, 100%). Data matched that reported.

Enantiomeric excess and conversion determined by HPLC analysis (Chiralcel ODH, 30 cm x 6mm column, hexane:*i*PrOH 90:10, 1.0 mL/min, T = 25°C) ketone 15.8 min, *R* isomer 11.3 min and *S* isomer 20.4 min.

$^1\text{H}$  NMR (400 MHz,  $\text{CDCl}_3$ )

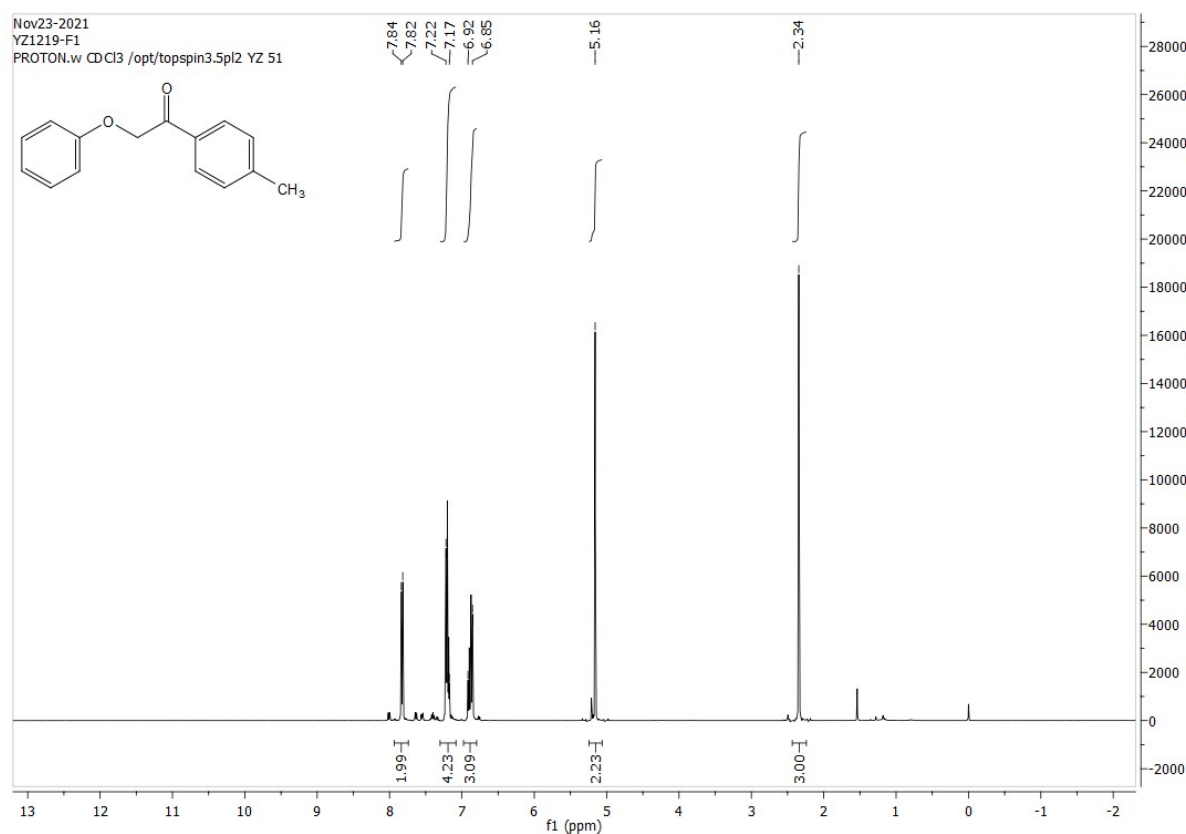

$^{13}\text{C}$  NMR (100 MHz,  $\text{CDCl}_3$ )

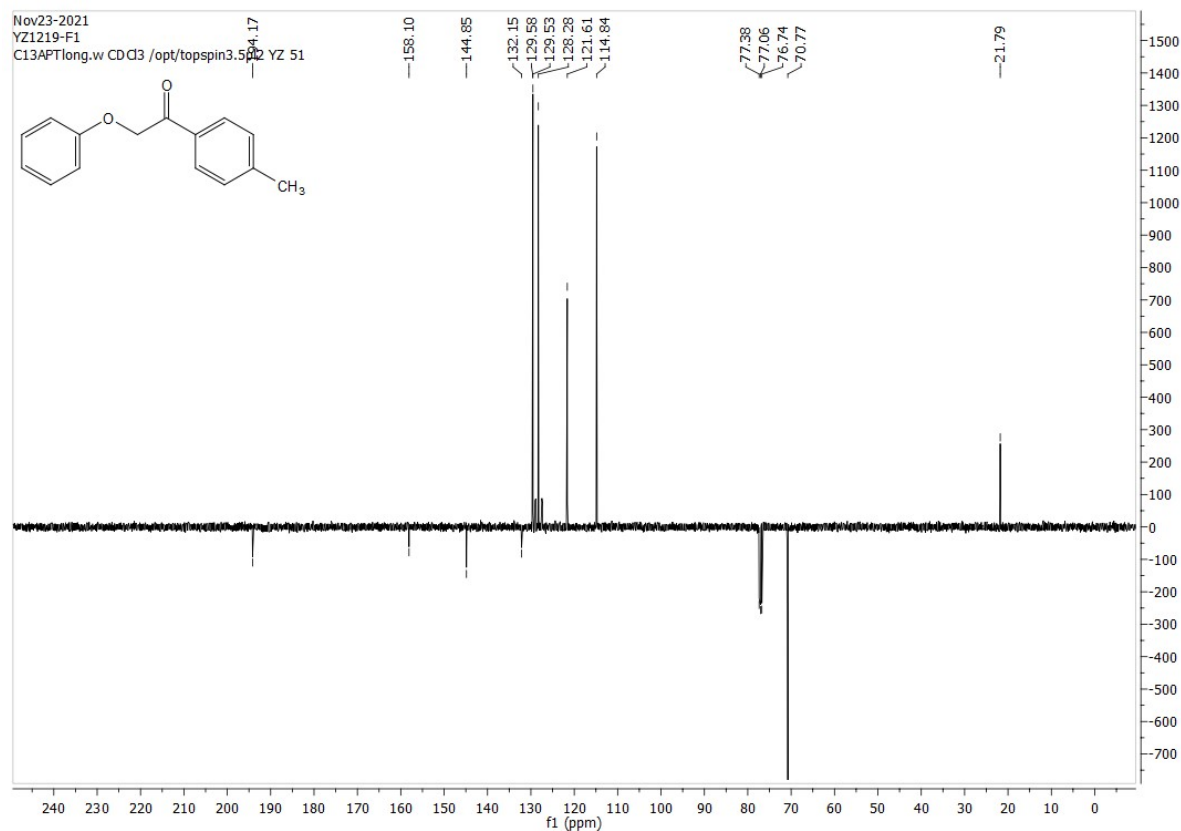

# HPLC of 2-phenoxy-1-(p-tolyl)ethan-1-one **20**

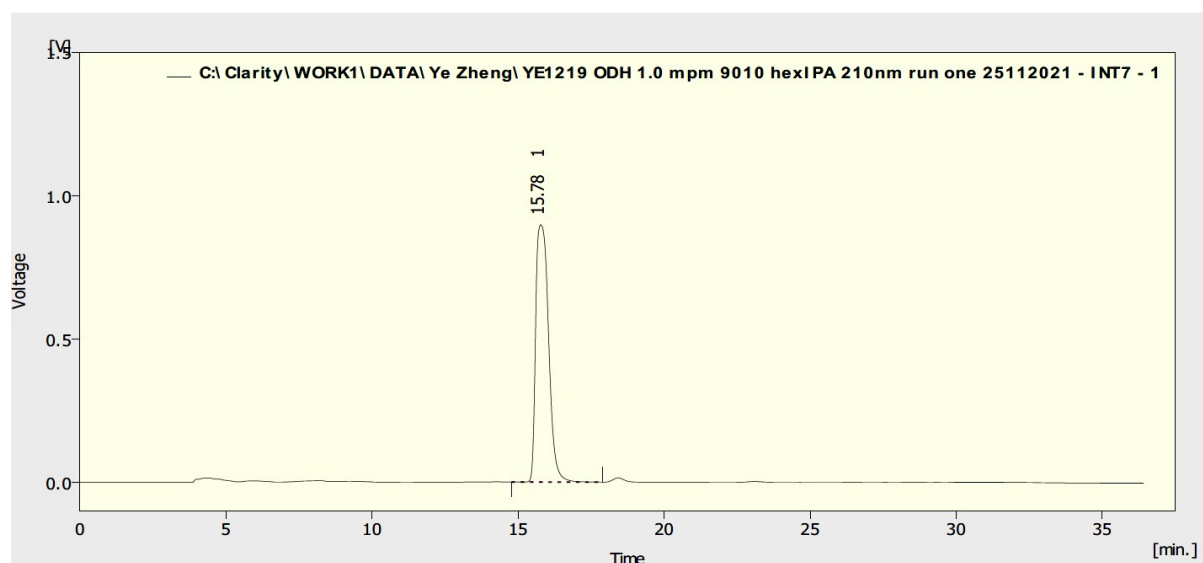

Result Table (Uncal - C:\Clarity\WORK1\DATA\Ye Zheng\YE1219 ODH 1.0 mpm 9010 hexIPA 210nm run one 25112021 - INT7 - 1)

|   | Reten. Time<br>[min] | Area<br>[mV.s] | Height<br>[mV] | Area<br>[%] | Height<br>[%] | W05<br>[min] | Compound<br>Name |
|---|----------------------|----------------|----------------|-------------|---------------|--------------|------------------|
| 1 | 15.777               | 27525.701      | 897.697        | 100.0       | 100.0         | 0.48         |                  |
|   | Total                | 27525.701      | 897.697        | 100.0       | 100.0         |              |                  |

Racemic and (*S*)-2-Phenoxy-1-(*p*-tolyl)ethan-1-ol **19** by coupling with (*S*)-**12** and ATH of **20**.

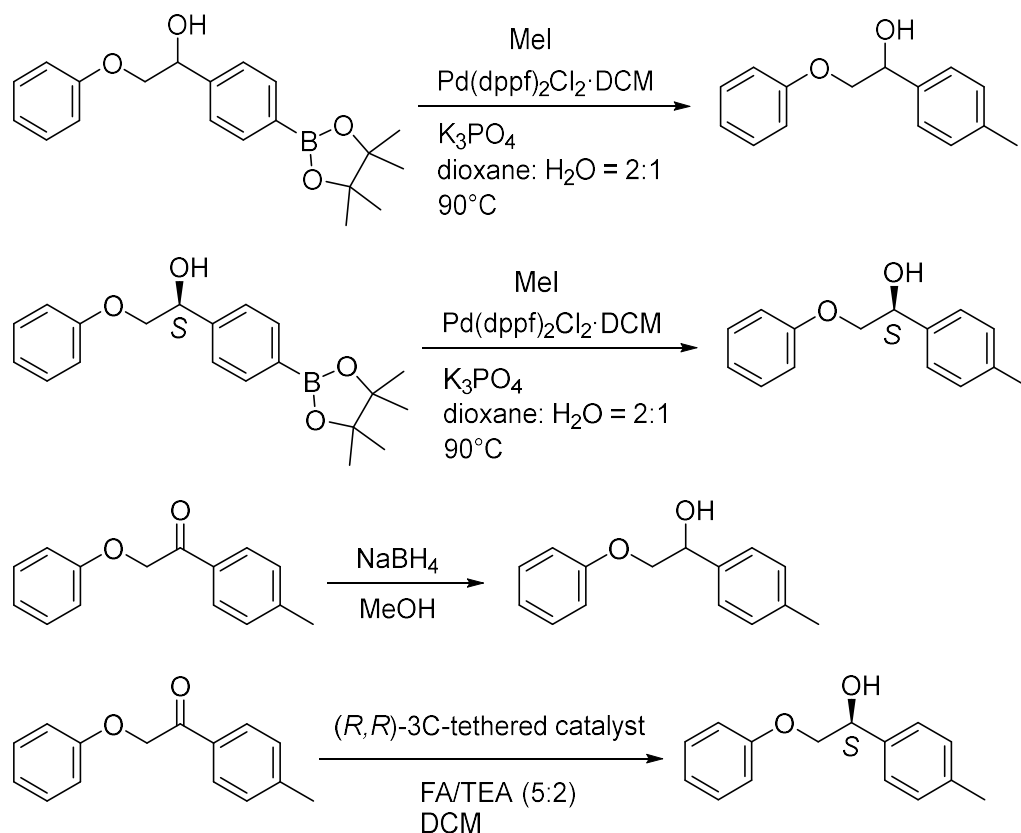

This compound has been reported and fully characterized.

Reference: K. Huang, M. Oritiz-Marciales, W. Correa, E. Pomales, X. Y. Lopez, *J. Org. Chem.* 2009, **74**, 4195-4202.

Racemic 2-phenoxy-1-(*p*-tolyl)ethan-1-ol **19** by coupling reaction.

To a solution of racemic 2-phenoxy-1-(4-(4,4,5,5-tetramethyl-1,3,2-dioxaborolan-2-yl)phenyl)ethan-1-ol **12** (216 mg, 0.635 mmol), iodomethane (135 mg, 0.953 mmol) and tripotassium phosphate (405 mg, 1.91 mmol) in dioxane (3.2 mL) and distilled water (1.6 mL) was added  $\text{Pd(dppf)}_2\text{Cl}_2 \cdot \text{DCM}$  (26.0 mg, 0.0318 mmol). The reaction mixture was heated to 90 °C and left stirring under the nitrogen atmosphere overnight, followed by TLC (9:1 hexane: EtOAc). The mixture was quenched by distilled water (20 mL). EtOAc (20 mL) was added and the organic layer was separated. The aqueous layer was extracted with EtOAc (3 × 20 mL), and the combined organic layers were dried ( $\text{MgSO}_4$ ) and filtered. Solvent was removed to give the crude product. The product was isolated via flash chromatography on silica eluted with 0-20% ethyl acetate in hexane to give racemic 2-phenoxy-1-(*p*-tolyl)ethan-1-ol **19** as a colorless

oil (92.0 mg, 0.404 mmol, 64%). TLC: R<sub>f</sub> ca 0.40 (9:1 hexane: EtOAc), strong UV and KMnO<sub>4</sub>;  $\delta_{\text{H}}$  (400 MHz, CDCl<sub>3</sub>) 7.35 (2H, d,  $J$  = 7.9, ArH), 7.30-7.25 (2H, m, ArH), 7.21 (2H, d,  $J$  = 7.9, ArH), 6.97 (1H, t,  $J$  = 7.3, ArH), 6.93 (2H, d,  $J$  = 8.3, ArH), 5.10 (1H, dd,  $J$  = 8.8, 3.0, ArCH), 4.09 (1H, dd,  $J$  = 9.6, 3.2, CH<sub>2</sub>), 4.00 (1H, t,  $J$  = 9.2, CH<sub>2</sub>), 2.73 (1H, s, OH), 2.36 (3H, s, CH<sub>3</sub>) ppm;  $\delta_{\text{C}}$  (100 MHz, CDCl<sub>3</sub>) 158.43 (C), 137.97 (C), 136.68 (C), 129.57 (CH), 129.27 (CH), 126.24 (CH), 121.28 (CH), 114.65 (CH), 73.32 (CH<sub>2</sub>), 72.46 (CH), 21.19 (CH<sub>3</sub>) ppm;  $m/z$  (ES-API+) 251.1 (M<sup>+</sup> + 23, 100%). Data matched that reported.

Enantiomeric excess and conversion determined by HPLC analysis (Chiralcel ODH, 30 cm x 6mm column, hexane:iPrOH 90:10, 1.0 mL/min, T = 25°C) ketone 15.8 min, *R* isomer 11.3 min and *S* isomer 20.4 min. The same column was used as reported in the reference above.

(*S*)-2-phenoxy-1-(*p*-tolyl)ethan-1-ol **19** by a coupling reaction.

To a solution of (*S*)-2-phenoxy-1-(4-(4,4,5,5-tetramethyl-1,3,2-dioxaborolan-2-yl)phenyl)ethan-1-ol **12** (216 mg, 0.635 mmol), iodomethane (135 mg, 0.953 mmol) and tripotassium phosphate (405 mg, 1.91 mmol) in dioxane (3.2 mL) and distilled water (1.6 mL) was added Pd(dppf)<sub>2</sub>Cl<sub>2</sub>·DCM (26.0 mg, 0.0318 mmol). The reaction mixture was heated to 90 °C and left stirring under the nitrogen atmosphere overnight, followed by TLC (9:1 hexane: EtOAc). The mixture was quenched by distilled water (20 mL). EtOAc (20 mL) was added and the organic layer was separated. The aqueous layer was extracted with EtOAc (3 × 20 mL), and the combined organic layers were dried (MgSO<sub>4</sub>) and filtered. Solvent was removed to give the crude product. The product was isolated via flash chromatography on silica eluted with 0-20% ethyl acetate in hexane to give (*S*)-2-phenoxy-1-(*p*-tolyl)ethan-1-ol **19** as a colorless oil (95.0 mg, 0.417 mmol, 66%). The reaction was also followed by HPLC (Chiralcel ODH, 30 cm x 6mm column, hexane:iPrOH 90:10, 1.0 mL/min, T = 25°C):  $[\alpha]_{\text{D}}^{23}$  +113 (c 0.300 in CHCl<sub>3</sub>) 96% ee (*S*) (lit.  $[\alpha]_{\text{D}}^{20}$  +43 (c 1.2 in CHCl<sub>3</sub>) 98% ee. (*S*)) Reference: K. Huang, M. Oritiz-Marciales, W. Correa, E. Pomales, X. Y. Lopez, *J. Org. Chem.* 2009, **74**, 4195-4202.

Racemic 2-phenoxy-1-(*p*-tolyl)ethan-1-ol **19** by NaBH<sub>4</sub> reduction of ketone)

To a solution of 2-phenoxy-1-(*p*-tolyl)ethan-1-one **20** (50.0 mg, 0.221 mmol) in MeOH (1.1 mL) was added sodium borohydride (16.8 mg, 0.442 mmol). The reaction

was stirred for 4 hours. TLC (9:1 hexane: EtOAc) after this time indicated full conversion. Distilled water (20 mL) was added, and the mixture was extracted with EtOAc (3 × 20 mL), dried with MgSO<sub>4</sub>, and the solvent was removed under vacuum to give 2-phenoxy-1-(*p*-tolyl)ethan-1-ol **19** as a colorless oil (48.0 mg, 0.211 mmol, 95%).

ATH of 2-phenoxy-1-(*p*-tolyl)ethan-1-one **20**.

(*R,R*)-3C-tethered Ru(II)-TsDPEN catalyst **2** (1.1 mg, 1.2 μmol, 1 mol%) was added to FA: TEA (5:2 azeotropic mixture, 0.18 mL) at rt and the mixture was stirred under a nitrogen atmosphere for 15 minutes; after which a solution of 2-phenoxy-1-(*p*-tolyl)ethan-1-one **20** (40.0 mg, 0.177 mmol) in DCM (0.25 mL) was added. The reaction mixture was stirred under a nitrogen atmosphere and followed by TLC (4:1 hexane: EtOAc). After 72 hours, the reaction was quenched using saturated NaHCO<sub>3</sub> solution (20 mL). EtOAc (20 mL) was added and the organic layer was separated. The aqueous layer was extracted with EtOAc (3 × 20 mL) and the combined organic layers were dried (MgSO<sub>4</sub>) and filtered. The solvent was removed to give the crude product. The product was isolated via flash chromatography on silica eluted with 0-50% ethyl acetate in hexane to give (*S*)-2-phenoxy-1-(*p*-tolyl)ethan-1-ol **19** as a colorless oil (18.0 mg, 0.0789 mmol, 45%). The reaction was also followed by HPLC (Chiralcel ODH, 30 cm x 6mm column, hexane:iPrOH 90:10, 1.0 mL/min, T = 25°C): 96% ee (*S*).



$^1\text{H}$  NMR (400 MHz,  $\text{CDCl}_3$ )

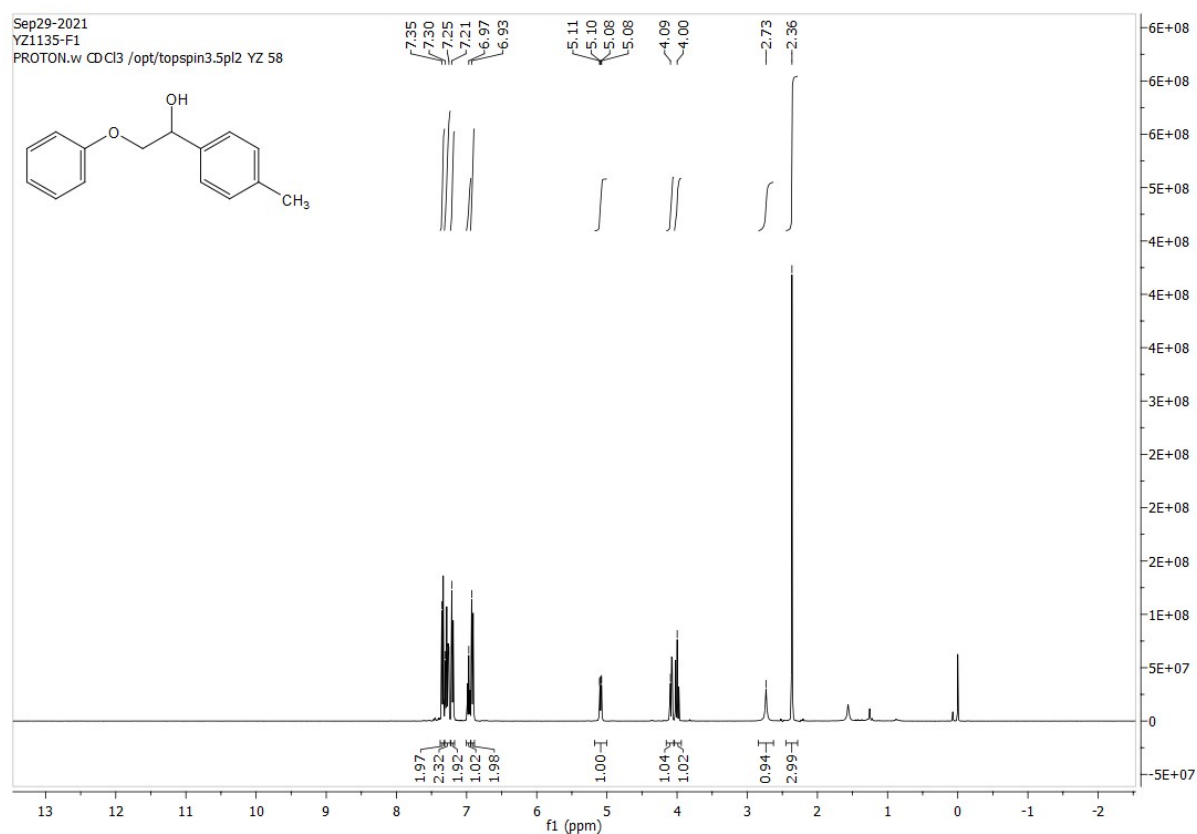

$^{13}\text{C}$  NMR (100 MHz,  $\text{CDCl}_3$ )

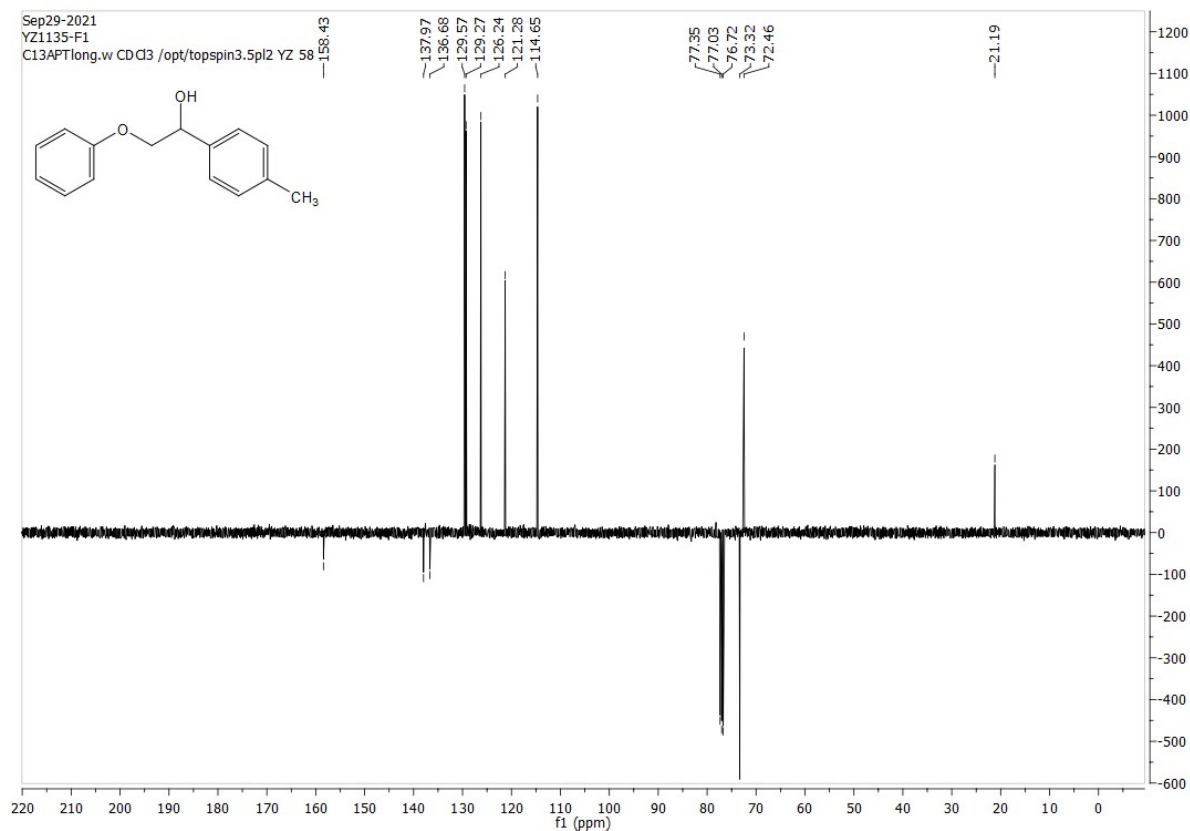

HPLC of racemic 2-phenoxy-1-(p-tolyl)ethan-1-ol **19** from coupling.

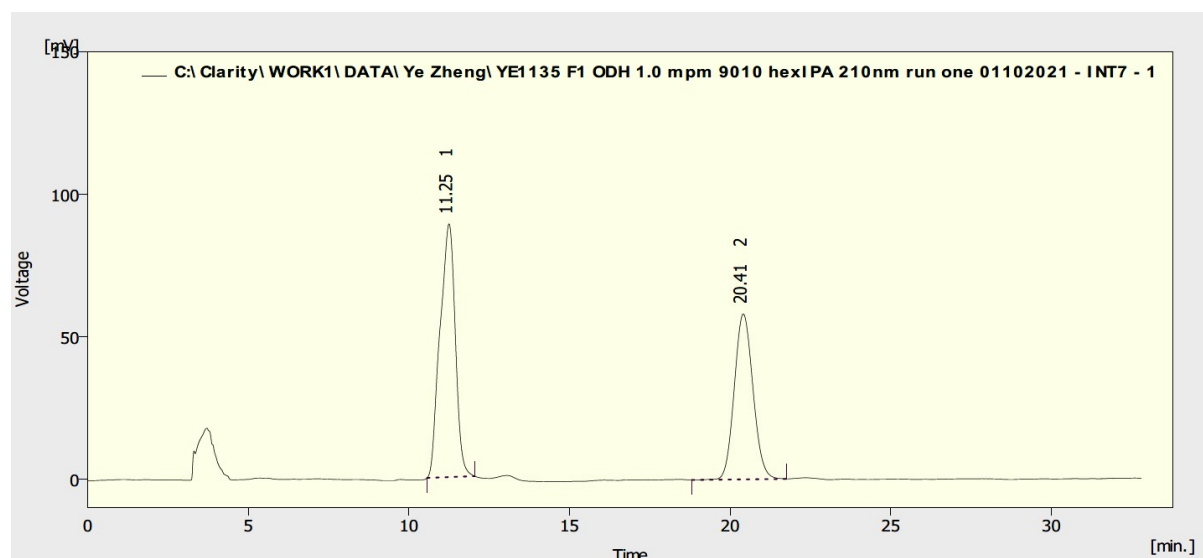

Result Table (Uncal - C:\Clarity\WORK1\DATA\Ye Zheng\YE1135 F1 ODH 1.0 mpm 9010 hexIPA 210nm run one 01102021 - INT7 - 1)

|   | Reten. Time<br>[min] | Area<br>[mV.s] | Height<br>[mV] | Area<br>[%] | Height<br>[%] | W05<br>[min] | Compound<br>Name |
|---|----------------------|----------------|----------------|-------------|---------------|--------------|------------------|
| 1 | 11.247               | 2939.259       | 88.889         | 55.6        | 60.5          | 0.55         |                  |
| 2 | 20.410               | 2350.964       | 58.081         | 44.4        | 39.5          | 0.63         |                  |
|   | Total                | 5290.223       | 146.970        | 100.0       | 100.0         |              |                  |

HPLC of racemic 2-phenoxy-1-(p-tolyl)ethan-1-ol **19** via reduction of **20** with NaBH<sub>4</sub>.

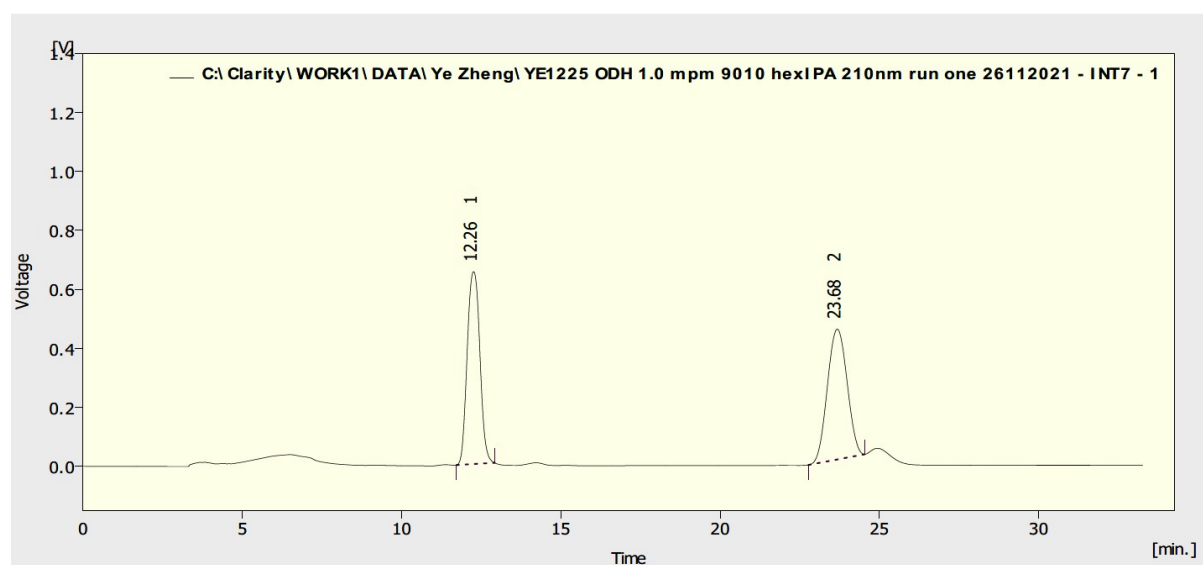

Result Table (Uncal - C:\Clarity\WORK1\DATA\Ye Zheng\YE1225 ODH 1.0 mpm 9010 hexIPA 210nm run one 26112021 - INT7 - 1)

|   | Reten. Time<br>[min] | Area<br>[mV.s] | Height<br>[mV] | Area<br>[%] | Height<br>[%] | W05<br>[min] | Compound<br>Name |
|---|----------------------|----------------|----------------|-------------|---------------|--------------|------------------|
| 1 | 12.260               | 17988.782      | 652.412        | 48.6        | 59.6          | 0.44         |                  |
| 2 | 23.677               | 19014.163      | 442.080        | 51.4        | 40.4          | 0.69         |                  |
|   | Total                | 37002.945      | 1094.493       | 100.0       | 100.0         |              |                  |

HPLC of (*S*)-2-phenoxy-1-(*p*-tolyl)ethan-1-ol **19** from coupling with (*S*)-**12** (96% ee, *S* configuration).

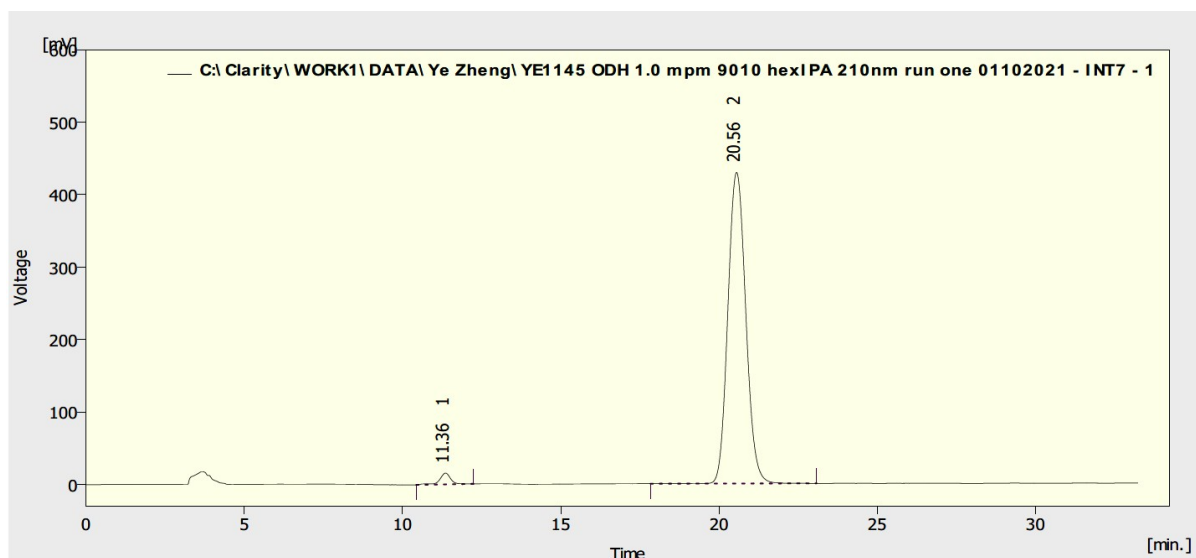

Result Table (Uncal - C:\Clarity\WORK1\DATA\Ye Zheng\YE1145 ODH 1.0 mpm 9010 hexIPA 210nm run one 01102021 - INT7 - 1)

|   | Reten. Time<br>[min] | Area<br>[mV.s] | Height<br>[mV] | Area<br>[%] | Height<br>[%] | W05<br>[min] | Compound<br>Name |
|---|----------------------|----------------|----------------|-------------|---------------|--------------|------------------|
| 1 | 11.360               | 374.961        | 15.657         | 2.2         | 3.5           | 0.33         |                  |
| 2 | 20.557               | 16887.249      | 429.611        | 97.8        | 96.5          | 0.61         |                  |
|   | Total                | 17262.210      | 445.268        | 100.0       | 100.0         |              |                  |

HPLC after ATH of 2-phenoxy-1-(*p*-tolyl)ethan-1-one **20** using (*R,R*)-3C-Tethered Ru(II)-TsDPEN catalyst **2** (after 72 hours, 100% conversion, 96% ee).

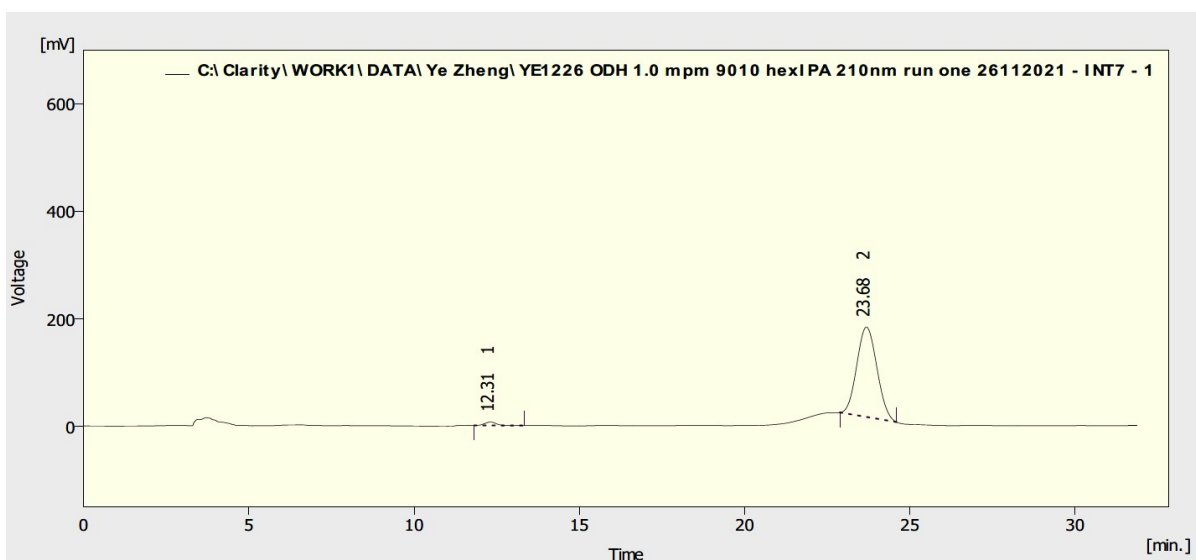

Result Table (Uncal - C:\Clarity\WORK1\DATA\Ye Zheng\YE1226 ODH 1.0 mpm 9010 hexIPA 210nm run one 26112021 - INT7 - 1)

|   | Reten. Time<br>[min] | Area<br>[mV.s] | Height<br>[mV] | Area<br>[%] | Height<br>[%] | W05<br>[min] | Compound<br>Name |
|---|----------------------|----------------|----------------|-------------|---------------|--------------|------------------|
| 1 | 12.310               | 158.090        | 6.489          | 2.2         | 3.7           | 0.37         |                  |
| 2 | 23.683               | 7068.289       | 167.301        | 97.8        | 96.3          | 0.67         |                  |
|   | Total                | 7226.379       | 173.790        | 100.0       | 100.0         |              |                  |

**Compound name:** 1-(4-Bromophenyl)-2-phenylethanone.

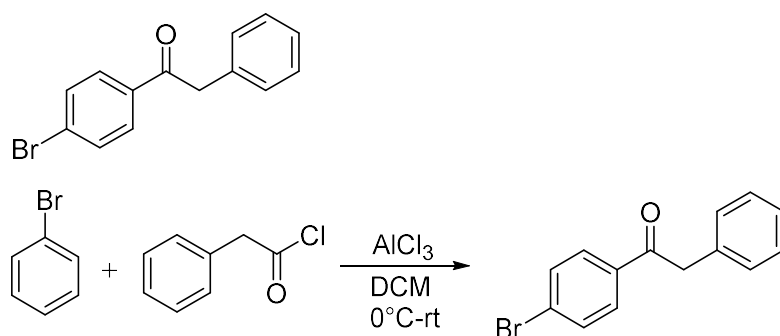

This compound has been reported and fully characterized: A. I. Khalaf, J. K. Huggan, C. J. Suckling, C. L. Gibson, K. Stewart, F. Giordani, M. P. Barrett, P. E. Wong, K. L. Barrack, W. N. Hunter, *J. Med. Chem.* 2014, **57**, 6479-6494.

To a solution of bromobenzene (314 mg, 2.00 mmol) in DCM (1.2 mL) at  $0^\circ\text{C}$  was added  $\text{AlCl}_3$  (217 mg, 2.04 mmol) and a solution of 2-phenylacetyl chloride (315 mg, 2.04 mmol) in DCM (0.6 mL). The reaction mixture was then stirred under a nitrogen atmosphere at  $0^\circ\text{C}$  for 15 minutes. Then the reaction mixture was heated to  $50^\circ\text{C}$  and left stirring under the nitrogen atmosphere for 5 hours. After which the reaction mixture was cooled down to rt and left stirring under the nitrogen atmosphere overnight. The mixture was poured into ice water and quenched with 2M HCl solution (20 mL). EtOAc (20 mL) was added and the organic layer was separated. The aqueous layer was extracted with EtOAc ( $3 \times 20$  mL), and the combined organic layers were dried ( $\text{MgSO}_4$ ) and filtered. Solvent was removed to give the crude product. The product was isolated via flash chromatography on silica eluted with 0-20% ethyl acetate in hexane to give 1-(4-bromophenyl)-2-phenylethan-1-one as a yellow solid (99.0 mg, 0.361 mmol, 18%). TLC:  $R_f$  ca 0.70 (9:1 hexane: EtOAc), strong UV and  $\text{KMnO}_4$ ;  $\delta_{\text{H}}$  (400 MHz,  $\text{CDCl}_3$ ) 7.86 (2H, d,  $J = 8.5$ , ArH), 7.59 (2H, d,  $J = 8.5$ , ArH), 7.33-7.30 (2H, m, ArH), 7.26-7.22 (3H, m, ArH), 4.24 (2H, s,  $\text{CH}_2$ ) ppm;  $\delta_{\text{C}}$  (100 MHz,  $\text{CDCl}_3$ ) 196.61 (C), 135.28 (C), 134.17 (C), 131.99 (CH), 130.17 (CH), 129.39 (CH), 128.80 (CH), 128.39 (C), 127.07 (CH), 45.55 ( $\text{CH}_2$ ) ppm;  $m/z$  (ES-API+) 297.0 ( $\text{M}^+ + 23$ , 100%). Data matched that reported.

$^1\text{H}$  NMR (400 MHz,  $\text{CDCl}_3$ )

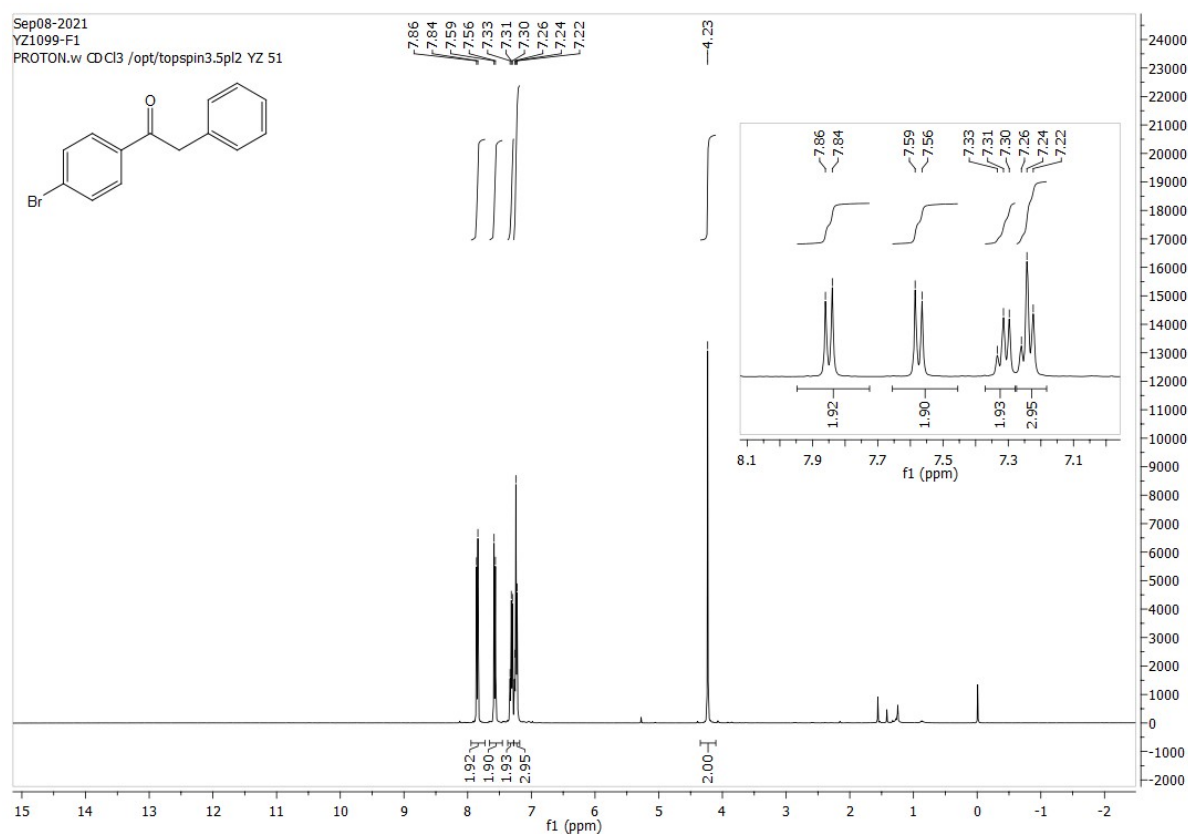

$^{13}\text{C}$  NMR (100 MHz,  $\text{CDCl}_3$ )

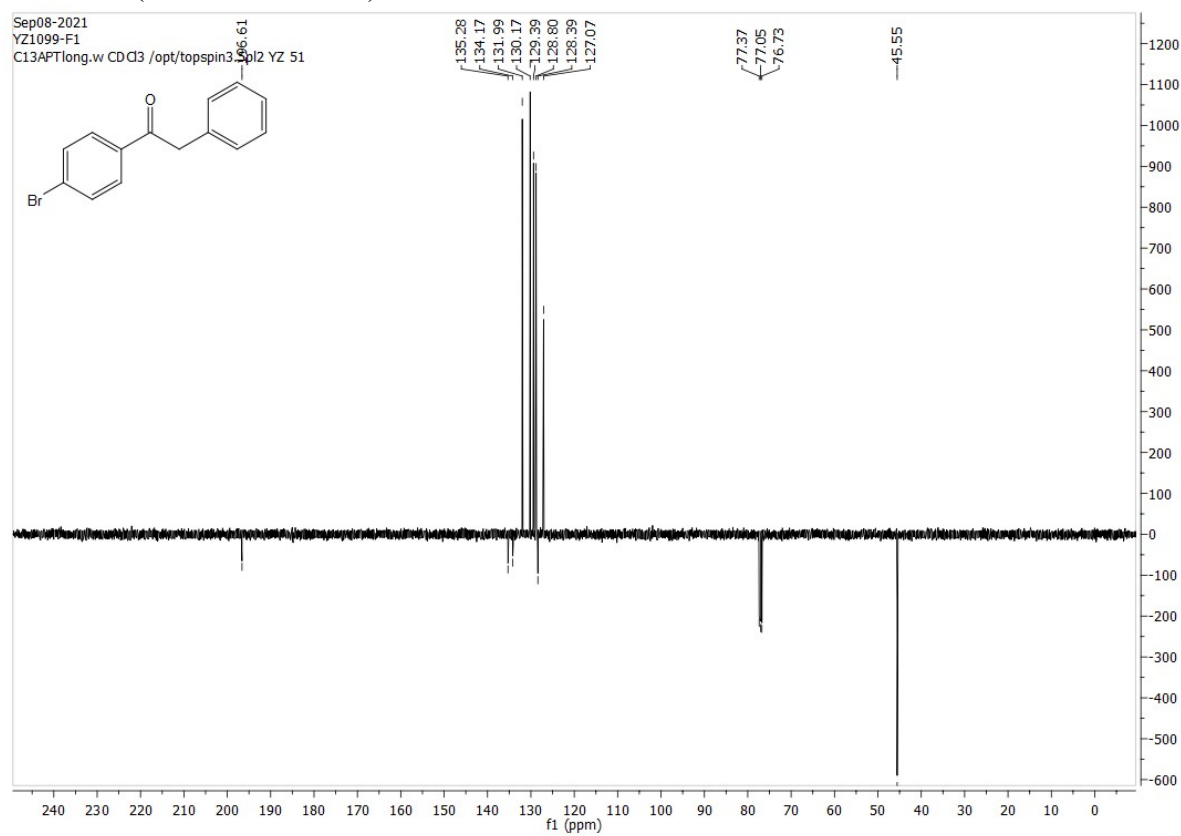

2-Phenyl-1-(4-(4,4,5,5-tetramethyl-1,3,2-dioxaborolan-2-yl)phenyl)ethan-1-one.

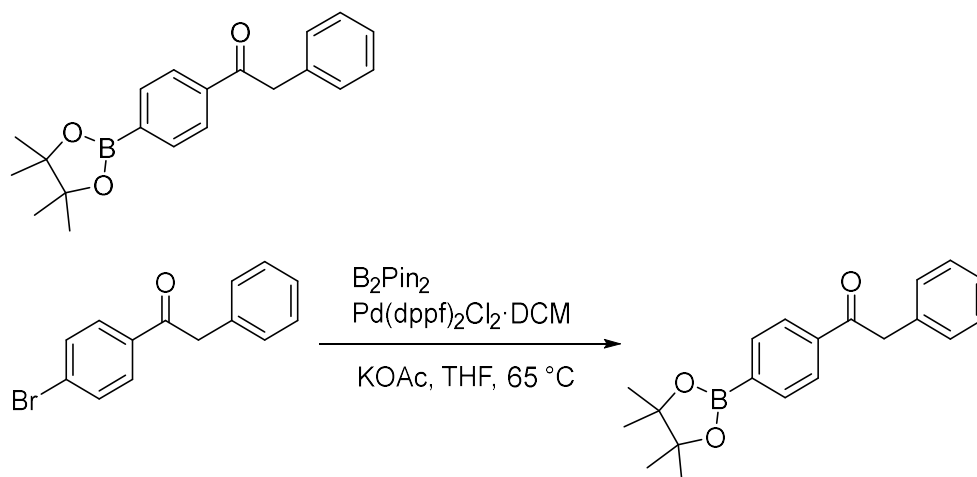

This compound has been reported and fully characterized: B. Lee, P. J. Chirik, *J. Am. Chem. Soc.* 2020, **142**, 2429-2437.

A round-bottom flask was charged with 1-(4-bromophenyl)-2-phenylethan-1-one (236 mg, 0.861 mmol), bis(pinacolato)diboron (262 mg, 1.03 mmol), potassium acetate (253 mg, 2.58 mmol), THF (4.3 mL) and  $Pd(dppf)_2Cl_2 \cdot DCM$  (35.2 mg, 0.0431 mmol). The reaction mixture was heated to 65 °C and left stirring under the nitrogen atmosphere overnight, followed by TLC (9:1 hexane: EtOAc). The mixture was quenched by distilled water (20 mL). EtOAc (20 mL) was added and the organic layer was separated. The aqueous layer was extracted with EtOAc (3 × 20 mL), and the combined organic layers were dried ( $MgSO_4$ ) and filtered. Solvent was removed to give the crude product. The product was isolated via flash chromatography on silica eluted with 0-20% ethyl acetate in hexane to give 2-phenyl-1-(4-(4,4,5,5-tetramethyl-1,3,2-dioxaborolan-2-yl)phenyl)ethan-1-one as a yellow solid (113 mg, 0.351 mmol, 41%). TLC:  $R_f$  ca 0.70 (9:1 hexane: EtOAc), strong UV and  $KMnO_4$ ;  $\delta_H$  (400 MHz,  $CDCl_3$ ) 7.99 (2H, d,  $J = 8.0$ , ArH), 7.89 (2H, d,  $J = 8.0$ , ArH), 7.33-7.22 (5H, m, ArH), 4.29 (2H, s,  $CH_2$ ), 1.35 (12H, s,  $CH_3$ ) ppm;  $\delta_C$  (100 MHz,  $CDCl_3$ ) 197.93 (C), 138.52 (C), 134.97 (CH), 134.48 (C), 129.50 (CH), 128.68 (CH), 127.61 (CH), 126.90 (CH), 84.23 (C), 45.67 ( $CH_2$ ), 24.89 ( $CH_3$ ) ppm;  $m/z$  (ES-API+) 345.1 ( $M^+ + 23$ , 100%). Data matched that reported.

Enantiomeric excess and conversion determined by HPLC analysis (Chiralcel ODH, 30 cm x 6mm column, hexane:iPrOH 90:10, 1.0 mL/min,  $T = 25^\circ C$ ) ketone 6.3 min, *R* and *S* isomers 6.2 min and 8.3 min.

$^1\text{H}$  NMR (400 MHz,  $\text{CDCl}_3$ )

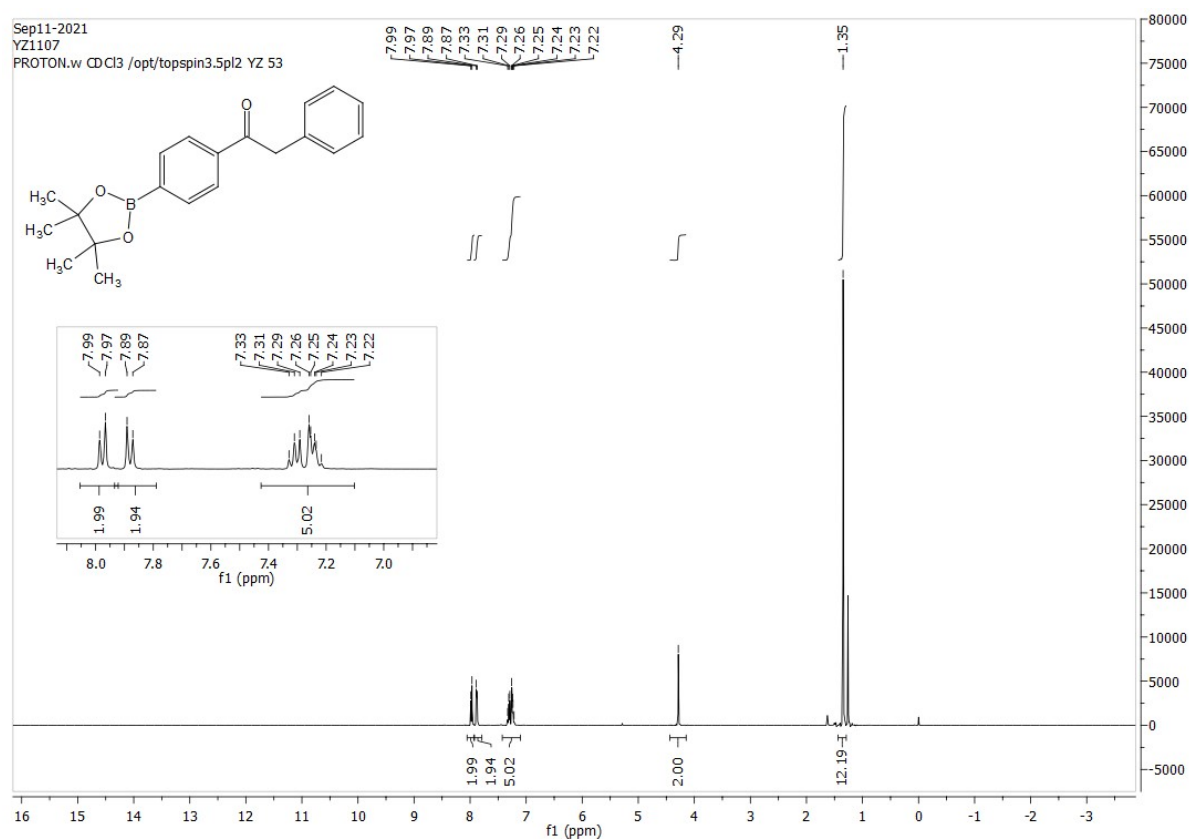

$^{13}\text{C}$  NMR (100 MHz,  $\text{CDCl}_3$ )

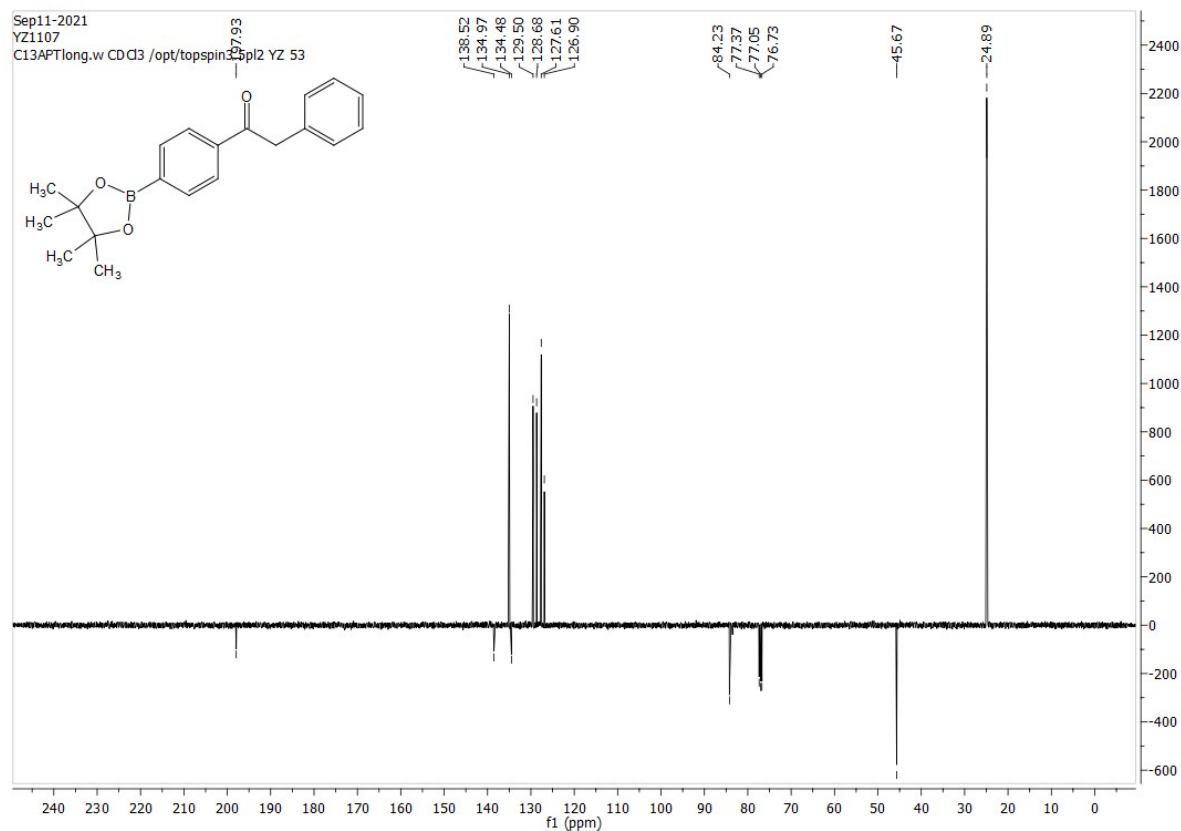

# HPLC of 2-phenyl-1-(4-(4,4,5,5-tetramethyl-1,3,2-dioxaborolan-2-yl)phenyl)ethan-1-one

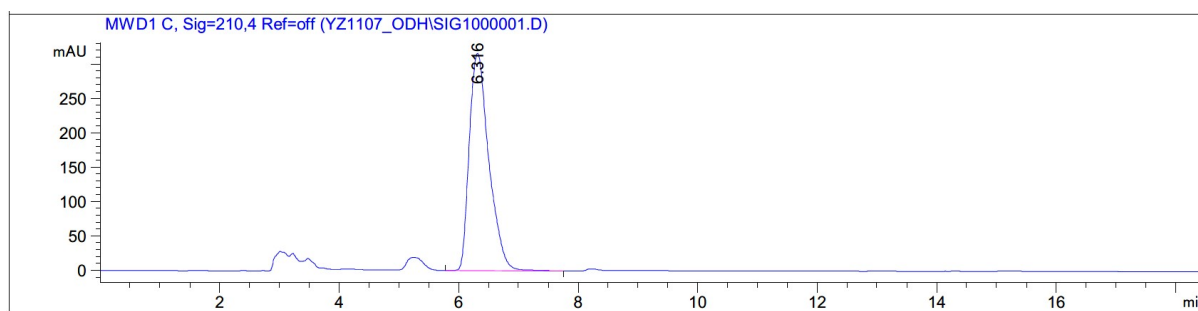

Signal 2: MWD1 C, Sig=210,4 Ref=off

| Peak # | RetTime [min] | Type | Width [min] | Area [mAU*s] | Height [mAU] | Area %   |
|--------|---------------|------|-------------|--------------|--------------|----------|
| 1      | 6.316         | BB   | 0.3495      | 7180.31592   | 315.49176    | 100.0000 |

Totals : 7180.31592 315.49176



Racemic and (*R*)-2-phenyl-1-(4-(4,4,5,5-tetramethyl-1,3,2-dioxaborolan-2-yl)phenyl)ethan-1-ol **13**.

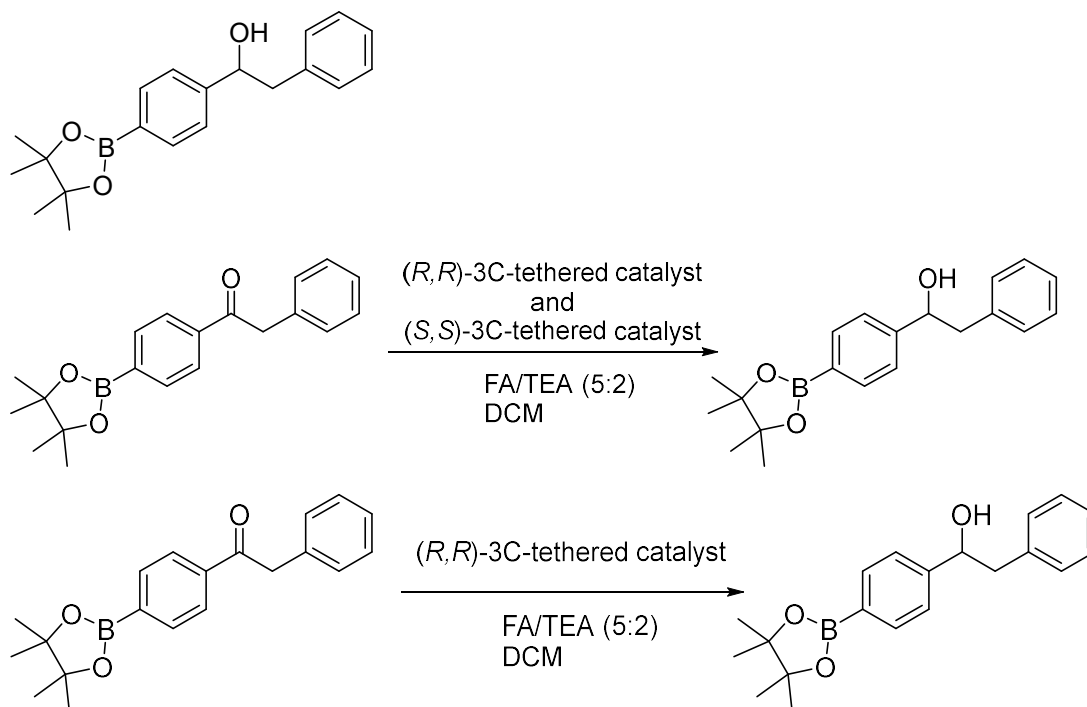

This compound is novel.

#### Synthesis of a racemic standard:

(*R,R*)-3C-Tethered Ru(II)-TsDPEN catalyst **2** (0.38 mg, 0.62  $\mu$ mol, 0.5 mol%) and (*S,S*)-3C-tethered Ru(II)-TsDPEN catalyst **2** (0.38 mg, 0.62  $\mu$ mol, 0.5 mol%) were added to FA: TEA (5:2 azeotropic mixture, 0.18 mL) at rt and the mixture was stirred under a nitrogen atmosphere for 15 minutes; after which a solution of 2-phenyl-1-(4-(4,4,5,5-tetramethyl-1,3,2-dioxaborolan-2-yl)phenyl)ethan-1-one (40.0 mg, 0.124 mmol) in DCM (0.25 mL) was added. The reaction mixture was stirred under a nitrogen atmosphere and followed by TLC (4:1 hexane: EtOAc). After 72 hours, the reaction was quenched using saturated NaHCO<sub>3</sub> solution (20 mL). EtOAc (20 mL) was added and the organic layer was separated. The aqueous layer was extracted with EtOAc (3 x 20 mL) and the combined organic layers were dried (MgSO<sub>4</sub>) and filtered. The solvent was removed to give the crude product. The product was isolated via flash chromatography on silica eluted with 0-20% EtOAc in hexane to give 2-phenyl-1-(4-(4,4,5,5-tetramethyl-1,3,2-dioxaborolan-2-yl)phenyl)ethan-1-ol **13** as a colorless oil (21.0 mg, 0.0648 mmol, 52%). TLC: R<sub>f</sub> ca 0.20 (4:1 hexane: EtOAc), strong UV and KMnO<sub>4</sub>; HRMS: (found (ESI<sup>+</sup>): [M+H]<sup>+</sup>, Calcd for C<sub>20</sub>H<sub>25</sub>BNaO<sub>3</sub> 347.1789; Found 347.1789; 1.1 ppm error;  $\nu_{\text{max}}$  3434 (br), 3036, 2920, 1467, 1455, 1398, 1319, 1231, 1164, 1088, 1018, 802 cm<sup>-1</sup>;  $\delta_{\text{H}}$  (500 MHz, CDCl<sub>3</sub>) 7.80 (2H, d, *J* = 7.9, ArH),

7.37 (2H, d,  $J = 7.9$ , ArH), 7.30 (2H, t,  $J = 7.3$ , ArH), 7.24 (1H, t,  $J = 7.3$ , ArH), 7.20 (2H, d,  $J = 7.1$ , ArH), 4.93-4.90 (1H, m, ArCH), 3.06-2.95 (2H, m, CH<sub>2</sub>), 1.98 (1H, d,  $J = 2.9$ , OH), 1.35 (12H, s, CH<sub>3</sub>) ppm;  $\delta_c$  (125 MHz, CDCl<sub>3</sub>) 136.96 (C), 137.89 (C), 134.95 (CH), 129.55 (CH), 128.54 (CH), 126.66 (CH), 125.22 (CH), 83.81 (C), 75.32 (CH), 46.05 (CH<sub>2</sub>), 24.89 (CH<sub>3</sub>) ppm;  $m/z$  (ES-API+) 347.2 ( $M^+ + 23$ , 100%).

Enantiomeric excess and conversion determined by HPLC analysis (Chiralcel ODH, 30 cm x 6mm column, hexane:iPrOH 90:10, 1.0 mL/min,  $T = 25^\circ\text{C}$ ) ketone 6.3 min, *R* and *S* isomers 6.2 min and 8.3 min, configuration was assigned by analogy with **12**.

ATH of 2-phenyl-1-(4-(4,4,5,5-tetramethyl-1,3,2-dioxaborolan-2-yl)phenyl)ethan-1-one:

(*R,R*)-3C-tethered Ru(II)-TsDPEN catalyst **2** (0.77 mg, 1.2  $\mu\text{mol}$ , 1 mol%) was added to FA: TEA (5:2 azeotropic mixture, 0.18 mL) at rt and the mixture was stirred under a nitrogen atmosphere for 15 minutes; after which a solution of 2-phenyl-1-(4-(4,4,5,5-tetramethyl-1,3,2-dioxaborolan-2-yl)phenyl)ethan-1-one (40.0 mg, 0.124 mmol) in DCM (0.25 mL) was added. The reaction mixture was stirred under a nitrogen atmosphere and followed by TLC (4:1 hexane: EtOAc). After 72 hours, the reaction was quenched using saturated NaHCO<sub>3</sub> solution (20 mL). EtOAc (20 mL) was added and the organic layer was separated. The aqueous layer was extracted with EtOAc (3 x 20 mL) and the combined organic layers were dried (MgSO<sub>4</sub>) and filtered. The solvent was removed to give the crude product. The product was isolated via flash chromatography on silica eluted with 0-50% EtOAc in hexane to give (*R*)-2-phenyl-1-(4-(4,4,5,5-tetramethyl-1,3,2-dioxaborolan-2-yl)phenyl)ethan-1-ol **13** as a colorless oil (20.0 mg, 0.0617 mmol, 50%). The reaction was also followed by HPLC (Chiralcel ODH, 30 cm x 6mm column, hexane:iPrOH 90:10, 1.0 mL/min,  $T = 25^\circ\text{C}$ ):  $[\alpha]_D^{25} +0.75$  (c 0.400 in CHCl<sub>3</sub>) 96% ee.

<sup>1</sup>H NMR (500 MHz, CDCl<sub>3</sub>)

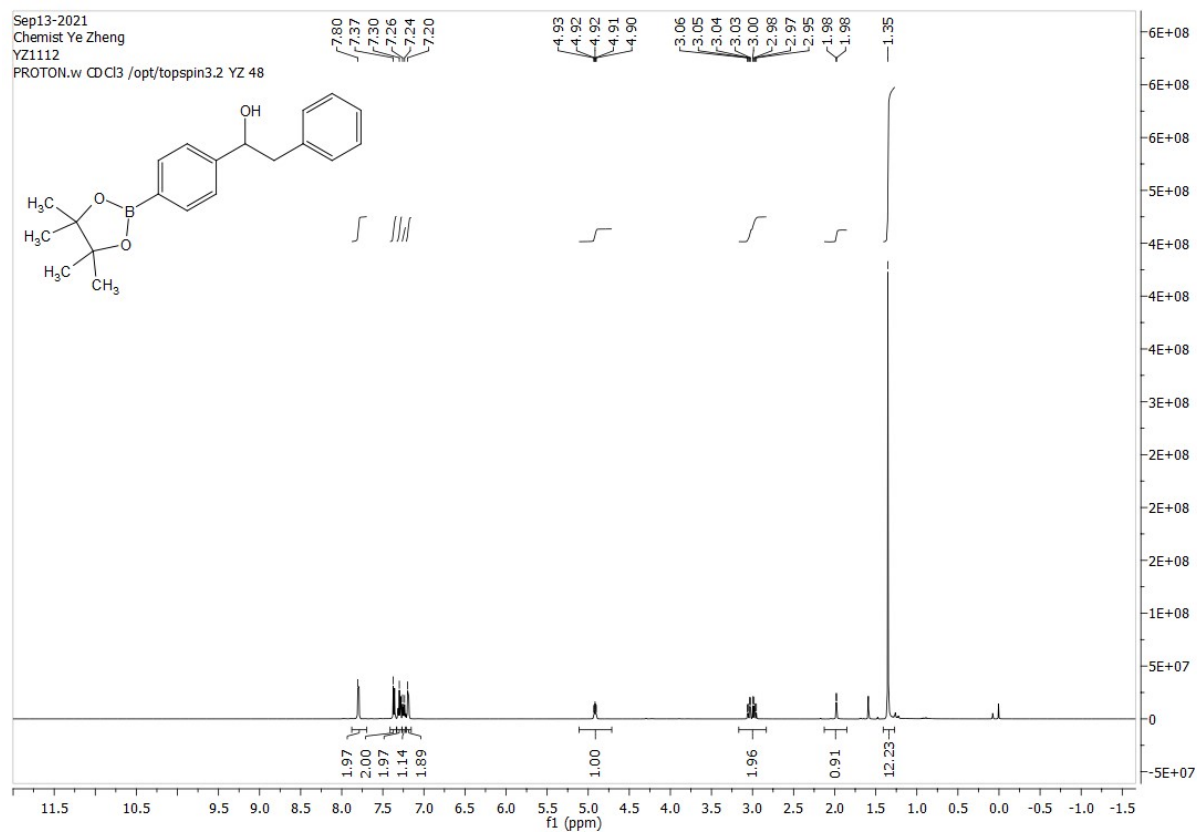

<sup>13</sup>C NMR (125 MHz, CDCl<sub>3</sub>)

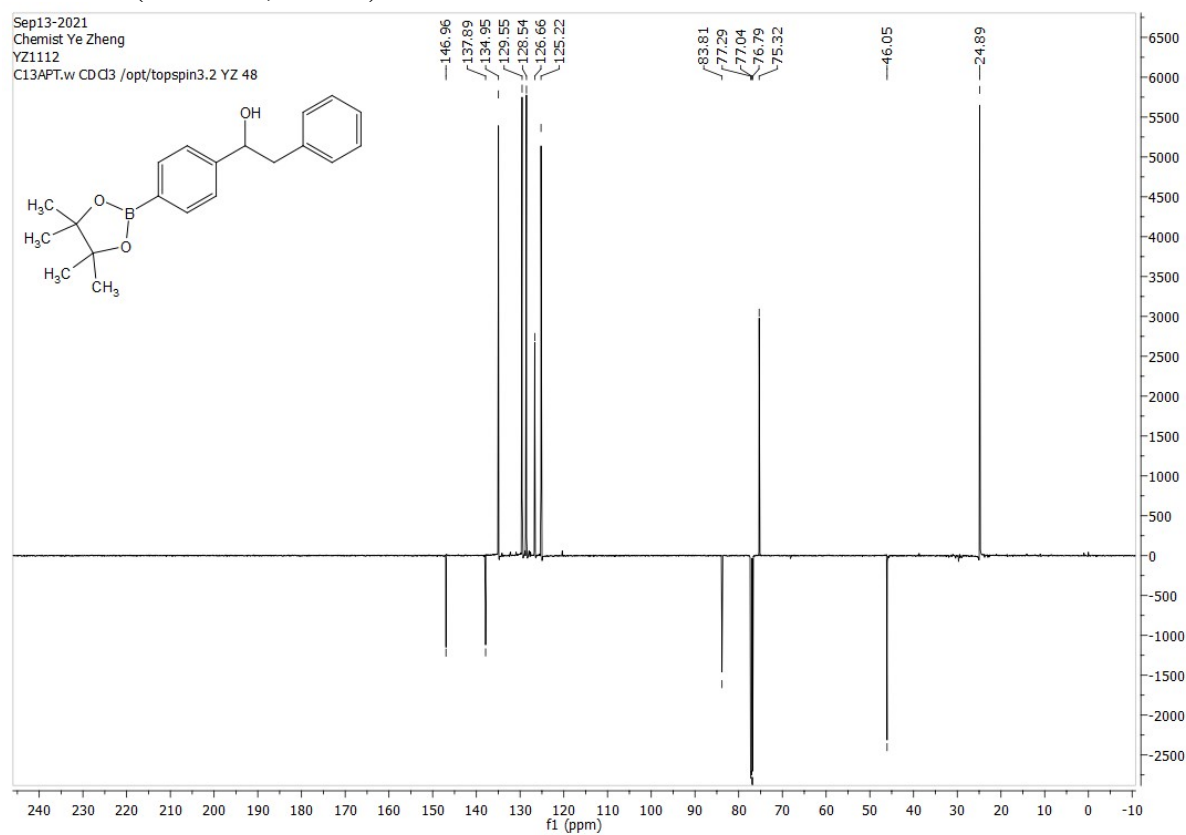

## COSY (500 MHz, CDCl<sub>3</sub>)

Chemist Ye Zheng  
YZ1112  
COSY.w CDCl<sub>3</sub> /opt/topspin3.2 YZ 48

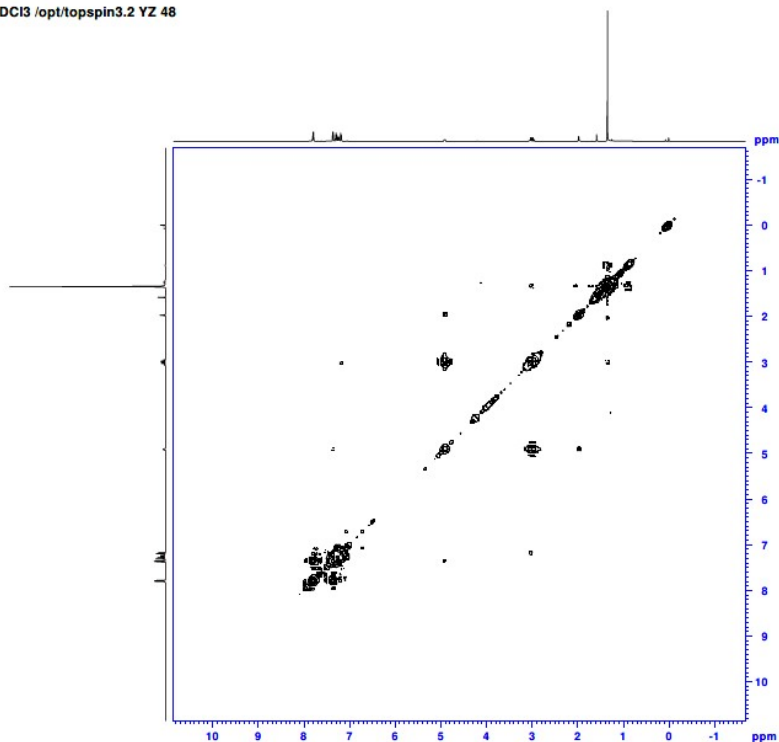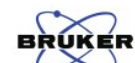

```
Current Data Parameters
NAME      Sep13-2021
EXPNO     1
PROCNO    1

F2 - Acquisition Parameters
Date_     20210913
Time      14.09
INSTRUM   spect
PROBHD    5 mm CPDQZ 13C
PULPROG   zgpg30
TD         65536
SOLVENT    CDCl3
NS         2
DS         4
SWH        4272.953 Hz
FIDRES     3.061904 Hz
AQ         0.1633939 sec
RG         47.05
WDW        192.733
SSB        0
LB          40.00
GB          0
PC         288.0 K
DQ         0.0000000 sec
DI1        1.9810476 sec
DI2        0.0000000 sec
DI3        0.0000000 sec
DI4        0.0000000 sec
DE         0.0000000 sec
SFO1       500.132091 MHz
NUC1       13C
P1         9.10 usec
P2         3.10 usec
P3         2000.00 usec
P4         13.00000000 N
P5         1.50049997 N
P6         0.00000000 N

===== CHANNEL f1 =====
NUC1       13C
P1         9.10 usec
P2         3.10 usec
P3         2000.00 usec
P4         13.00000000 N
P5         1.50049997 N
P6         0.00000000 N

===== GRADIENT CHANNEL =====
GRANAL1    0.0001000
OP1         10.00 N
P14         1000.00 usec

F1 - Acquisition parameters
SI         1024
SF         500.130151 MHz
WDW        0.0000000
SSB        0
LB          0 Hz
GB          0
PC         1.40

F1 - Processing parameters
SI         1024
SF         500.130151 MHz
WDW        0.0000000
SSB        0
LB          0 Hz
GB          0
PC         1.40
```

## HSQC (500 MHz, CDCl<sub>3</sub>)

Chemist Ye Zheng  
YZ1112  
HSQC.w CDCl<sub>3</sub> /opt/topspin3.2 YZ 48

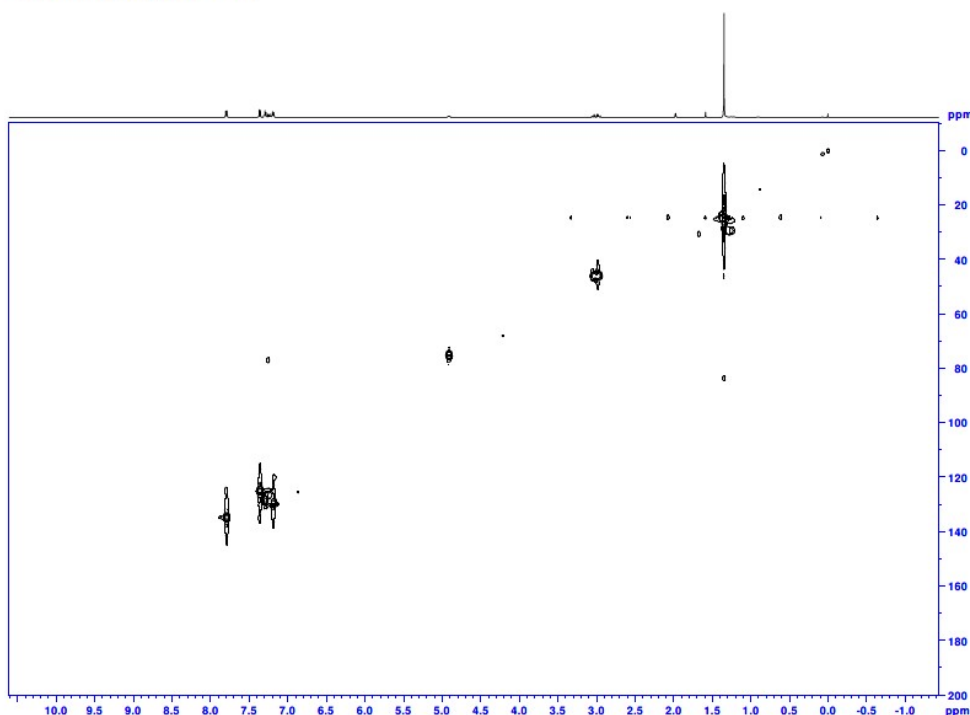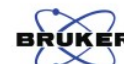

```
Current Data Parameters
NAME      Sep13-2021
EXPNO     1
PROCNO    1

F2 - Acquisition Parameters
Date_     20210913
Time      14.15
INSTRUM   spect
PROBHD    5 mm CPDQZ 13C
PULPROG   zgpg30
TD         65536
SOLVENT    CDCl3
NS         2
DS         4
SWH        4024.056 Hz
FIDRES     0.0849920 Hz
AQ         0.18530
RG         81.000
WDW        192.733
SSB        0
LB          40.00
GB          0
PC         288.0 K
DQ         0.0000000 sec
DI1        1.4807840 sec
DI2        0.0012044 sec
DI3        0.0000000 sec
DI4        0.0000000 sec
DE         0.0001850 sec
SFO1       500.132091 MHz
NUC1       13C
P1         9.10 usec
P2         3.10 usec
P3         2000.00 usec
P4         13.00000000 N
P5         1.50049997 N
P6         0.00000000 N

===== CHANNEL f1 =====
NUC1       13C
P1         9.10 usec
P2         3.10 usec
P3         2000.00 usec
P4         13.00000000 N
P5         1.50049997 N
P6         0.00000000 N

===== GRADIENT CHANNEL =====
GRANAL1    0.0001000
OP1         10.00 N
P14         1000.00 usec

F1 - Acquisition parameters
SI         1024
SF         500.130151 MHz
WDW        0.0000000
SSB        0
LB          0 Hz
GB          0
PC         1.40

F1 - Processing parameters
SI         1024
SF         500.130151 MHz
WDW        0.0000000
SSB        0
LB          0 Hz
GB          0
PC         1.40
```

# HMBC (500 MHz, CDCl<sub>3</sub>)

Chemist Ye Zheng  
YZ1112

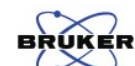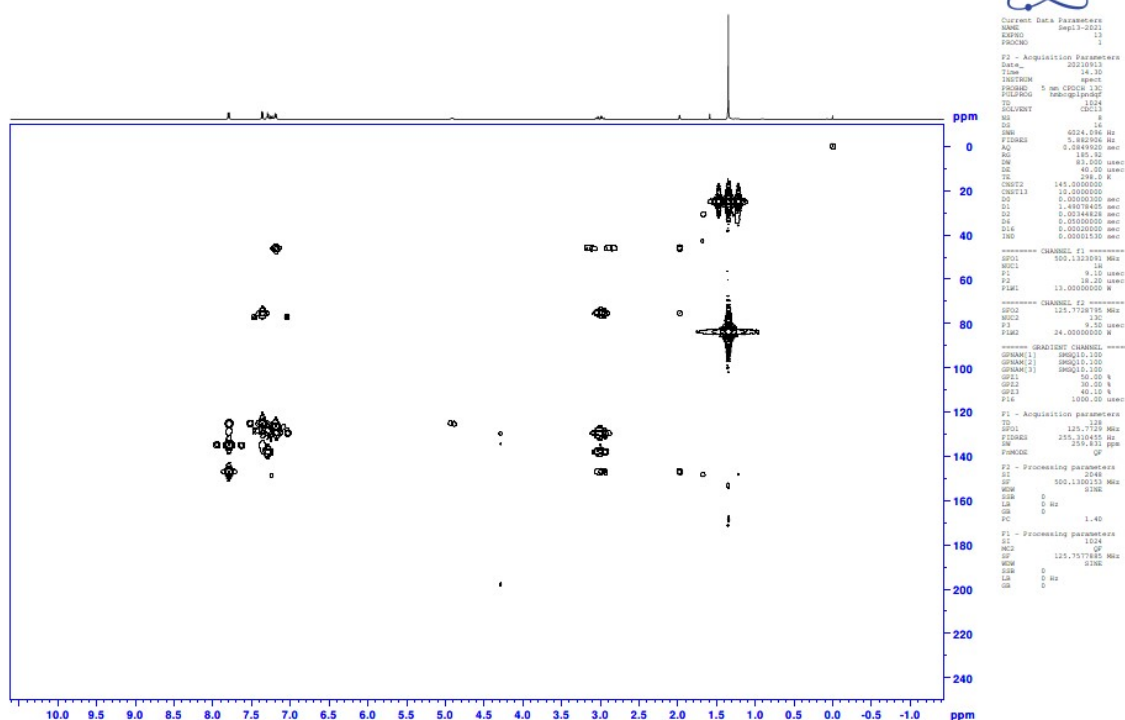

## HPLC of racemic 2-phenyl-1-(4-(4,4,5,5-tetramethyl-1,3,2-dioxaborolan-2-yl)phenyl)ethan-1-ol **13**.

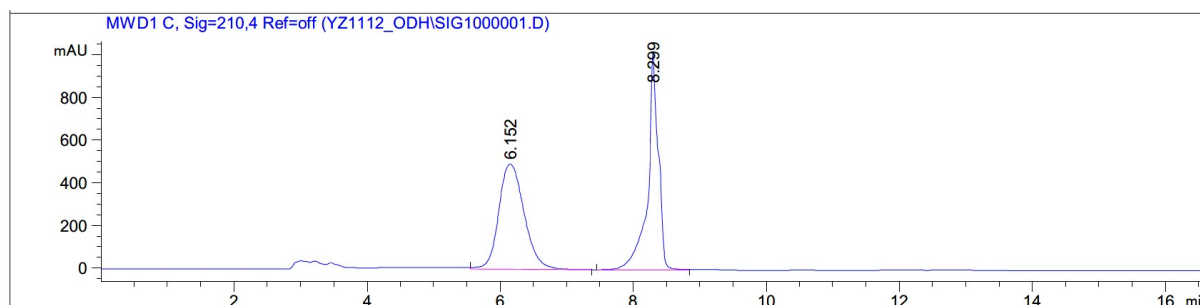

Signal 2: MWD1 C, Sig=210,4 Ref=off

| Peak # | RetTime [min] | Type | Width [min] | Area [mAU*s] | Height [mAU] | Area %  |
|--------|---------------|------|-------------|--------------|--------------|---------|
| 1      | 6.152         | VB   | 0.4106      | 1.30077e4    | 491.83240    | 53.2590 |
| 2      | 8.299         | BV   | 0.1467      | 1.14158e4    | 1019.23132   | 46.7410 |

Totals : 2.44234e4 1511.06372

HPLC after ATH of 2-phenyl-1-(4-(4,4,5,5-tetramethyl-1,3,2-dioxaborolan-2-yl)phenyl)ethan-1-one using (*R,R*)-3C-Tethered Ru(II)-TsDPEN catalyst **2** (after 72 hours, 100% conversion, 96% ee).

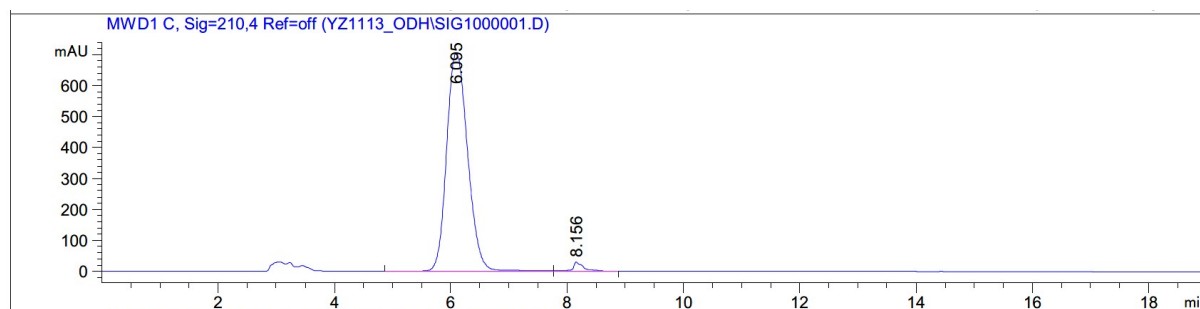

Signal 2: MWD1 C, Sig=210,4 Ref=off

| Peak # | RetTime [min] | Type | Width [min] | Area [mAU*s] | Height [mAU] | Area %  |
|--------|---------------|------|-------------|--------------|--------------|---------|
| 1      | 6.095         | VV   | 0.3915      | 1.77342e4    | 705.02429    | 97.9442 |
| 2      | 8.156         | VB   | 0.1581      | 372.23267    | 30.55074     | 2.0558  |

Totals : 1.81064e4 735.57503

1-(4-Bromophenyl)propan-1-one.

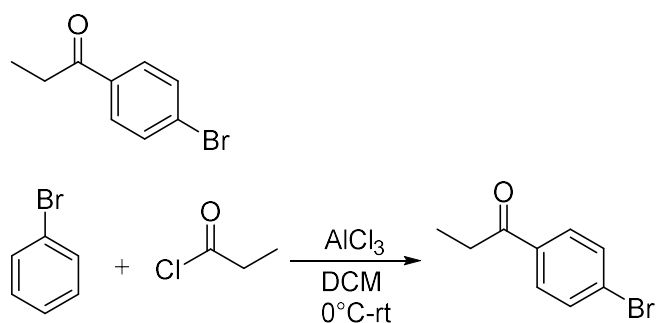

This compound has been reported and fully characterized: N. Rios-Lombardia, C. Vidal, M. Cocina, F. Moris, J. Garcia-Alvarez, J. Gonzalez-Sabin, *Chem. Commun.* 2015, **51**, 10937-10940.

To a solution of bromobenzene (318 mg, 2.00 mmol) was in DCM (1.2 mL) at 0 °C was added AlCl<sub>3</sub> (319 mg, 2.40 mmol) and a solution of propionyl chloride (189 mg, 2.04 mmol). The reaction mixture was stirred under a nitrogen atmosphere for 15 minutes. Then the reaction mixture was heated to 50 °C and left stirring under the nitrogen atmosphere for 2 hours, followed by TLC (9:1 hexane: EtOAc). The mixture was poured into ice water and quenched with 2M HCl solution (20 mL). EtOAc (20 mL) was added and the organic layer was separated. The aqueous layer was extracted with EtOAc (3 × 20 mL), and the combined organic layers were dried (MgSO<sub>4</sub>) and filtered. Solvent was removed to give the crude product. The product was isolated via flash chromatography on silica eluted with 0-5% ethyl acetate in hexane to give 1-(4-bromophenyl)propan-1-one as a yellow solid (190 mg, 0.896 mmol, 45%). TLC: R<sub>f</sub> ca 0.70 (9:1 hexane: EtOAc), strong UV and KMnO<sub>4</sub>; δ<sub>H</sub> (400 MHz, CDCl<sub>3</sub>) 7.83 (2H, d, *J* = 8.5, ArH), 7.60 (1H, d, *J* = 8.5, ArH), 2.97 (2H, q, *J* = 7.2, CH<sub>2</sub>), 1.21 (3H, t, *J* = 7.2, CH<sub>3</sub>) ppm; δ<sub>C</sub> (100 MHz, CDCl<sub>3</sub>) 199.71 (C), 135.63 (C), 131.87 (CH), 129.53 (CH), 127.99 (C), 31.78 (CH<sub>2</sub>), 8.13 (CH<sub>3</sub>) ppm. Data matched that reported.

$^1\text{H}$  NMR (400 MHz,  $\text{CDCl}_3$ )

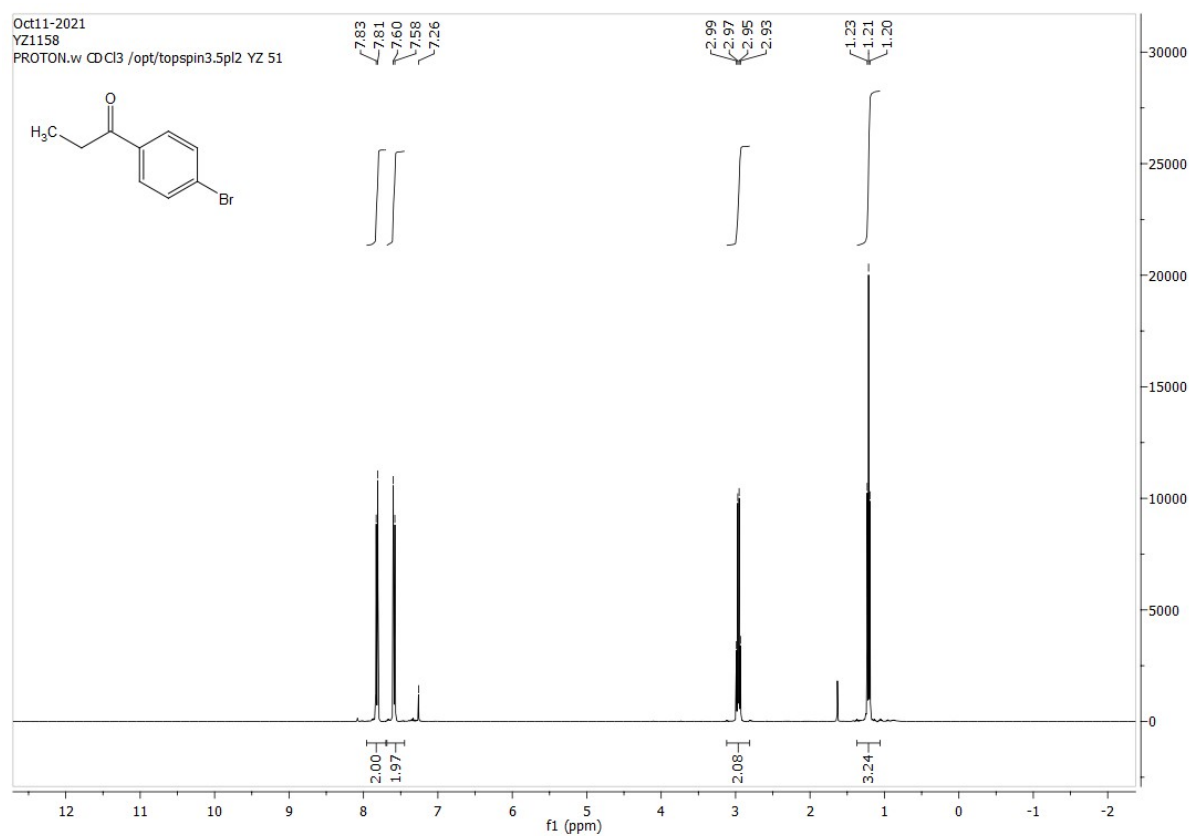

$^{13}\text{C}$  NMR (100 MHz,  $\text{CDCl}_3$ )

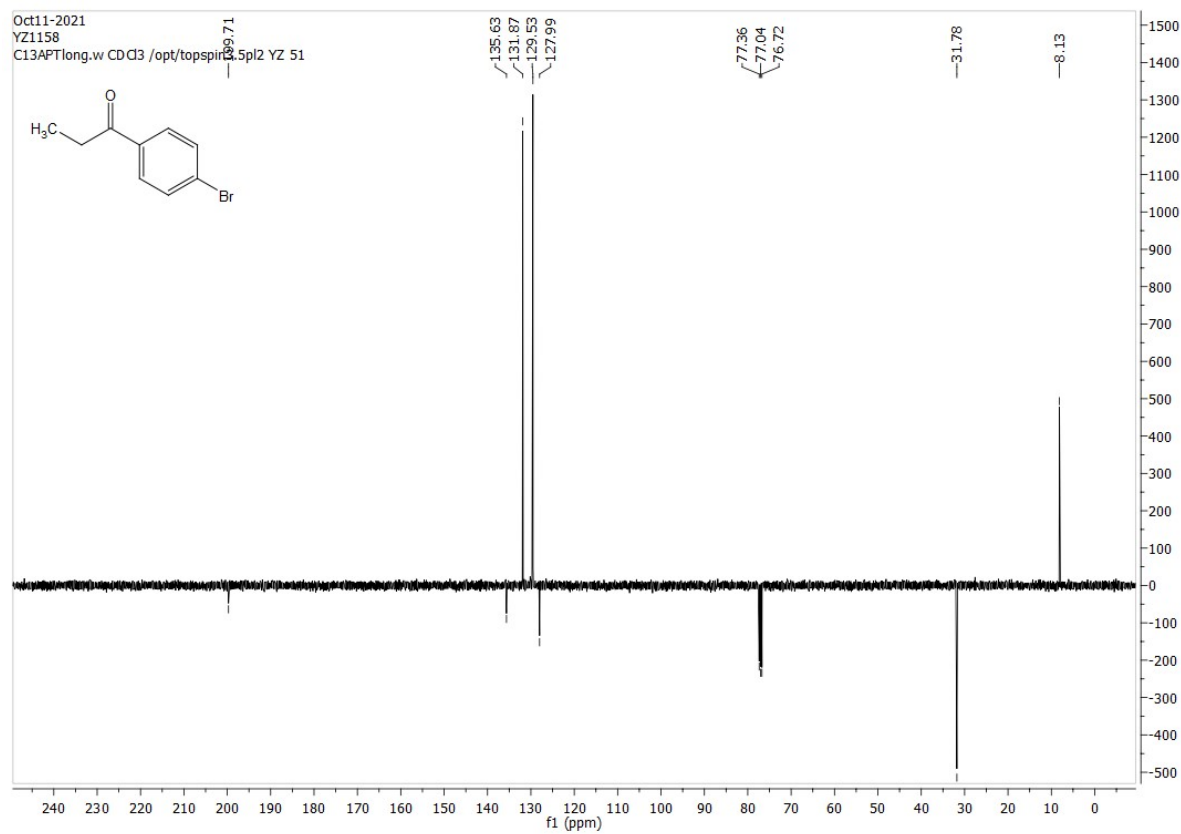



1-(4-(4,4,5,5-Tetramethyl-1,3,2-dioxaborolan-2-yl)phenyl)propan-1-one.

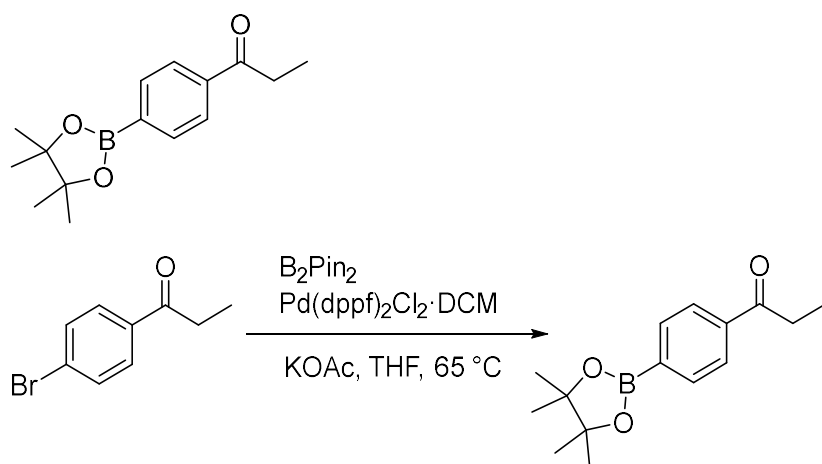

This compound has been reported and fully characterized: T. Kusakawa, Y. Kojima, F. Kannen, *Chem. Lett.* 2019, **48**, 1213-1216.

A round-bottom flask was charged with 1-(4-bromophenyl)propan-1-one (815 mg, 3.83 mmol), bis(pinacolato)diboron (1.17 g, 4.60 mmol), potassium acetate (1.13 g, 11.5 mmol), THF (19 mL) and  $Pd(dppf)_2Cl_2 \cdot DCM$  (157 mg, 0.192 mmol). The reaction mixture was heated to  $65\text{ }^\circ C$  and left stirring under the nitrogen atmosphere overnight, followed by TLC (9:1 hexane: EtOAc). The mixture was quenched by distilled water (20 mL). EtOAc (20 mL) was added and the organic layer was separated. The aqueous layer was extracted with EtOAc ( $3 \times 20\text{ mL}$ ), and the combined organic layers were dried ( $MgSO_4$ ) and filtered. Solvent was removed to give the crude product. The product was isolated via flash chromatography on silica eluted with 0-10% ethyl acetate in hexane to give 1-(4-(4,4,5,5-tetramethyl-1,3,2-dioxaborolan-2-yl)phenyl)propan-1-one as a white solid (527 mg, 2.03 mmol, 53%). TLC:  $R_f$  ca 0.50 (9:1 hexane: EtOAc), strong UV and  $KMnO_4$ ;  $\delta_H$  (400 MHz,  $CDCl_3$ ) 7.92 (4H, dd,  $J = 19.7, 7.9$ , ArH), 3.02 (2H, q,  $J = 7.2$ , ArCH), 1.35 (12H, s,  $CH_3$ ), 1.24 (3H, t,  $J = 7.2$ ,  $CH_3$ ) ppm;  $\delta_C$  (100 MHz,  $CDCl_3$ ) 201.12 (C), 138.85 (C), 134.92 (CH), 126.97 (CH), 84.18 (C), 31.99 ( $CH_2$ ), 24.88 ( $CH_3$ ), 8.21 ( $CH_3$ ) ppm;  $m/z$  (ESI+) 283.1 ( $M^+ + 23$ , 100%). Data matched that reported.

$^1\text{H}$  NMR (400 MHz,  $\text{CDCl}_3$ )

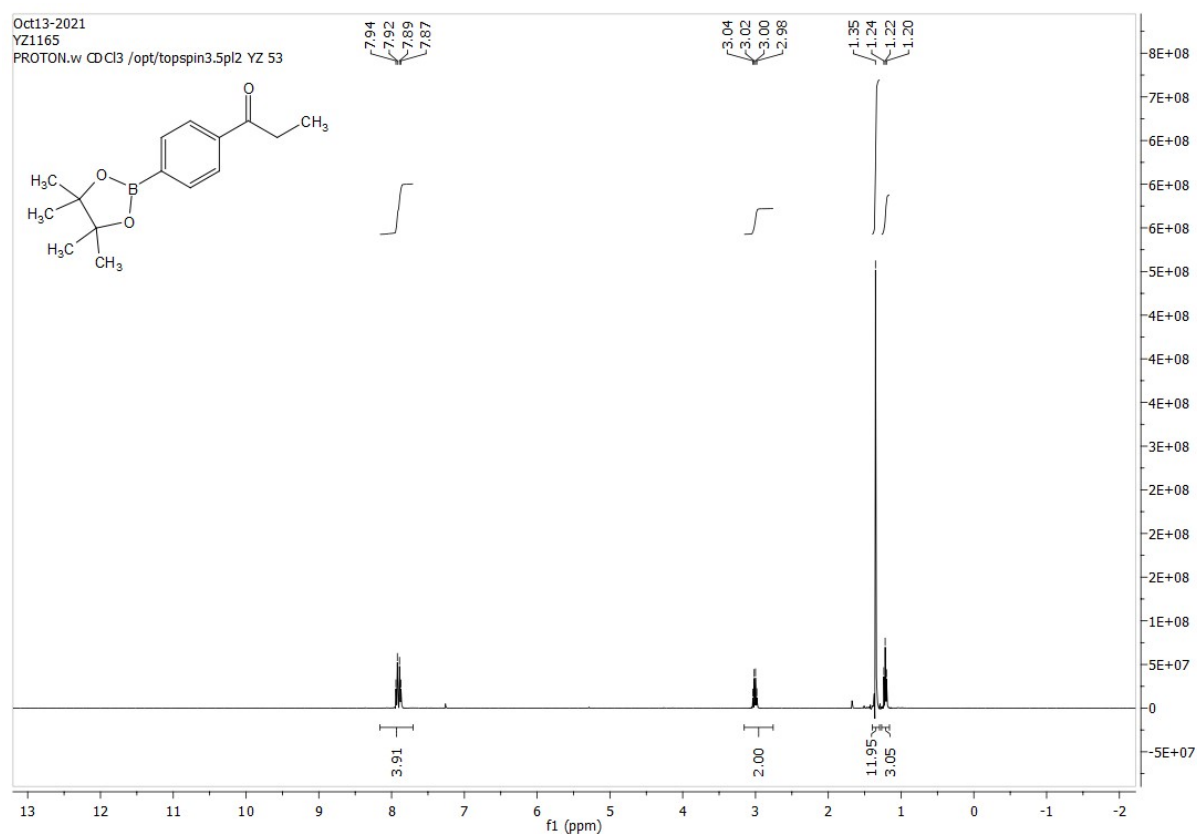

$^{13}\text{C}$  NMR (100 MHz,  $\text{CDCl}_3$ )

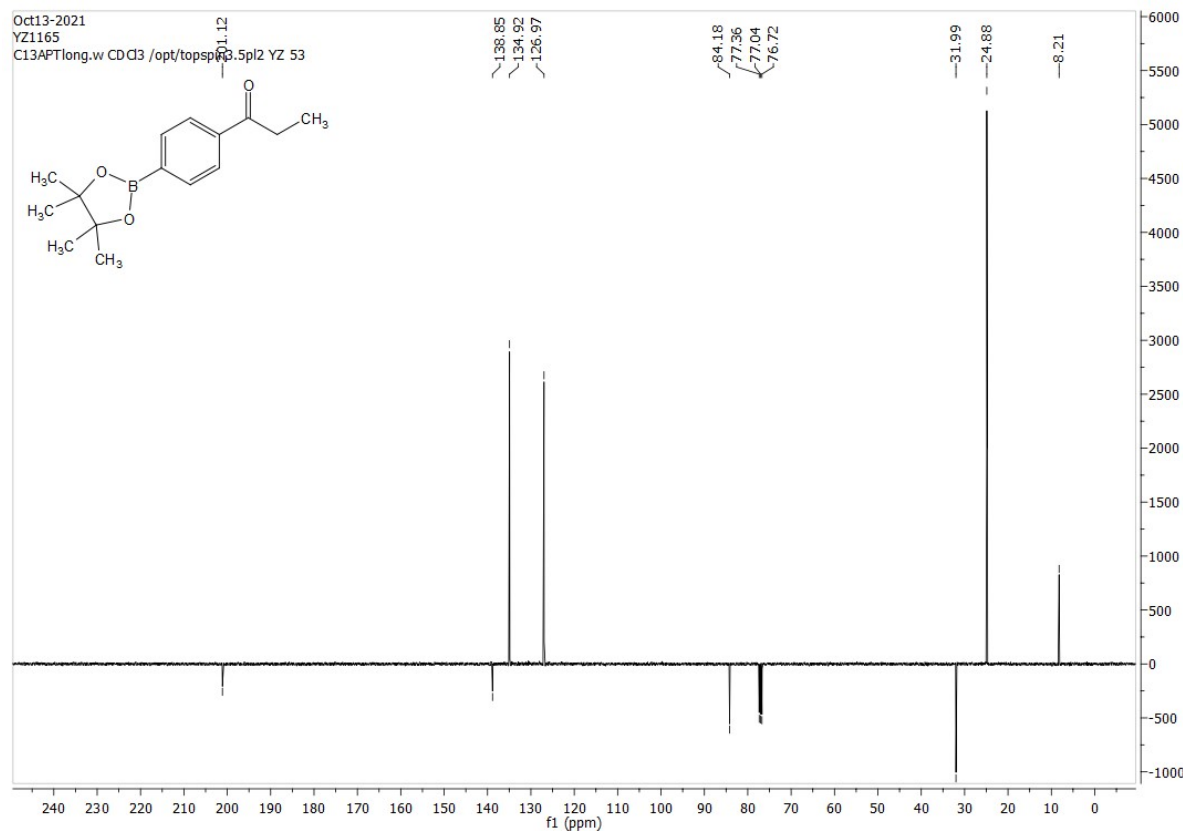

Racemic and (*R*)-1-(4-(4,4,5,5-Tetramethyl-1,3,2-dioxaborolan-2-yl)phenyl)propan-1-ol **14**.

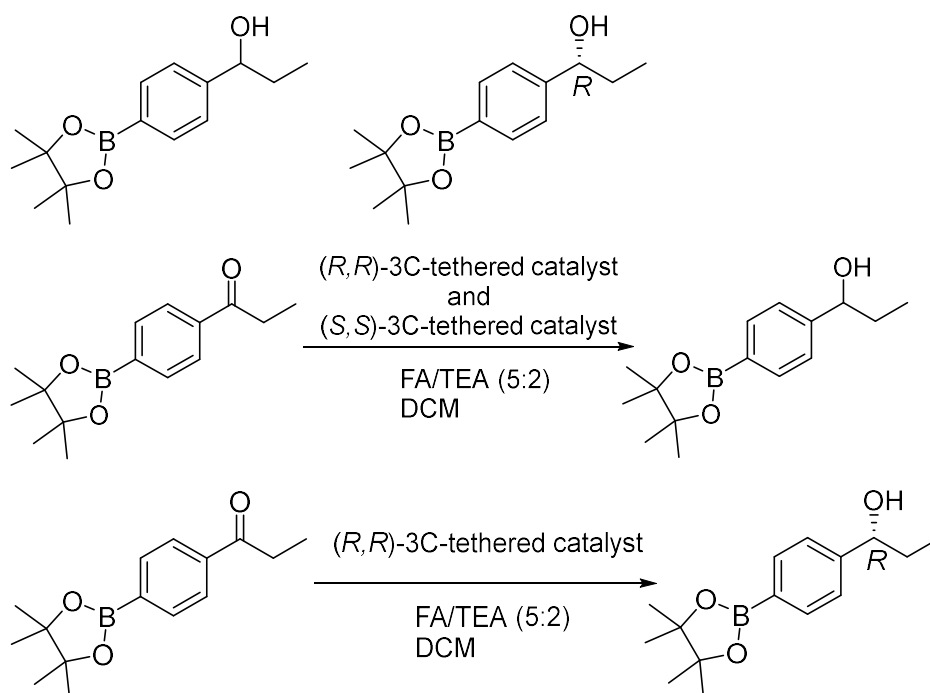

This compound is novel.

#### Synthesis of a racemic standard:

(*R,R*)-3C-Tethered Ru(II)-TsDPEN catalyst **2** (1.1 mg, 1.7  $\mu\text{mol}$ , 0.5 mol%) and (*S,S*)-3C-tethered Ru(II)-TsDPEN catalyst **2** (1.1 mg, 1.7  $\mu\text{mol}$ , 0.5 mol%) were added to FA: TEA (5:2 azeotropic mixture, 0.41 mL) at rt and the mixture was stirred under a nitrogen atmosphere for 15 minutes; after which a solution of 1-(4-(4,4,5,5-tetramethyl-1,3,2-dioxaborolan-2-yl)phenyl)propan-1-one (90.0 mg, 0.346 mmol) in DCM (0.56 mL) was added. The reaction mixture was stirred under a nitrogen atmosphere and followed by TLC (9:1 hexane: EtOAc). After 24 hours, the reaction was quenched using saturated  $\text{NaHCO}_3$  solution (20 mL). EtOAc (20 mL) was added and the organic layer was separated. The aqueous layer was extracted with EtOAc (3 x 20 mL) and the combined organic layers were dried ( $\text{MgSO}_4$ ) and filtered. The solvent was removed to give the crude product. The product was isolated via flash chromatography on silica eluted with 0-20% EtOAc in hexane to give 1-(4-(4,4,5,5-tetramethyl-1,3,2-dioxaborolan-2-yl)phenyl)propan-1-ol **14** as a white solid (61.0 mg, 0.233 mmol, 67%). TLC:  $R_f$  ca 0.20 (9:1 hexane: EtOAc), strong UV and  $\text{KMnO}_4$ ; Mp: 82°C; HRMS: (found (ESI+):  $[\text{M}+\text{H}]^+$ , Calcd for  $\text{C}_{15}\text{H}_{23}\text{BNaO}_3$  285.1632; Found 285.1632; 1.2 ppm error;  $\nu_{\text{max}}$  3258 (br), 2976, 2877, 1397, 1356, 1334, 1320, 1141, 1088, 1085, 1006, 962, 858  $\text{cm}^{-1}$ ;  $\delta_{\text{H}}$  (400 MHz,  $\text{CDCl}_3$ ) 7.80 (2H, d,  $J = 7.9$ ,

ArH), 7.35 (2H, d,  $J = 7.9$ , ArH), 4.65-4.57 (1H, m, ArCH), 1.92 (1H, d,  $J = 3.3$ , OH), 1.85-1.71 (2H, m, CH<sub>2</sub>), 1.34 (12H, s, CH<sub>3</sub>), 0.91 (3H, t,  $J = 7.4$ , CH<sub>3</sub>) ppm;  $\delta_C$  (100 MHz, CDCl<sub>3</sub>) 147.77 (C), 134.93 (CH), 125.29 (CH), 83.79 (C), 79.95 (CH), 31.89 (CH<sub>2</sub>), 24.88 (CH<sub>3</sub>), 10.05 (CH<sub>3</sub>) ppm;  $m/z$  (ES-API+) 285.1 ( $M^+ + 23$ , 100%).

ATH of 1-(4-(4,4,5,5-tetramethyl-1,3,2-dioxaborolan-2-yl)phenyl)propan-1-one): (*R,R*)-3C-tethered Ru(II)-TsDPEN catalyst **2** (2.2 mg, 3.5  $\mu$ mol, 1 mol%) was added to FA: TEA (5:2 azeotropic mixture, 0.41 mL) at rt and the mixture was stirred under a nitrogen atmosphere for 15 minutes; after which a solution of 1-(4-(4,4,5,5-tetramethyl-1,3,2-dioxaborolan-2-yl)phenyl)propan-1-one (90.0 mg, 0.346 mmol) in DCM (0.56 mL) was added. The reaction mixture was stirred under a nitrogen atmosphere and followed by TLC (9:1 hexane: EtOAc). After 24 hours, the reaction was quenched using saturated NaHCO<sub>3</sub> solution (20 mL). EtOAc (20 mL) was added and the organic layer was separated. The aqueous layer was extracted with EtOAc (3 x 20 mL) and the combined organic layers were dried (MgSO<sub>4</sub>) and filtered. The solvent was removed to give the crude product. The product was isolated via flash chromatography on silica eluted with 0-20% EtOAc in hexane to give (*R*)-1-(4-(4,4,5,5-tetramethyl-1,3,2-dioxaborolan-2-yl)phenyl)propan-1-ol **14** as a white solid (62.0 mg, 0.237 mmol, 68%). The reaction can't be separated in HPLC: 100% conversion,  $[\alpha]_D^{26} +25.8$  (c 0.485 in CHCl<sub>3</sub>), 94% ee, *S* configuration (ee and configuration were confirmed by comparison with compound after reaction with bromobenzene)

$^1\text{H}$  NMR (400 MHz,  $\text{CDCl}_3$ )

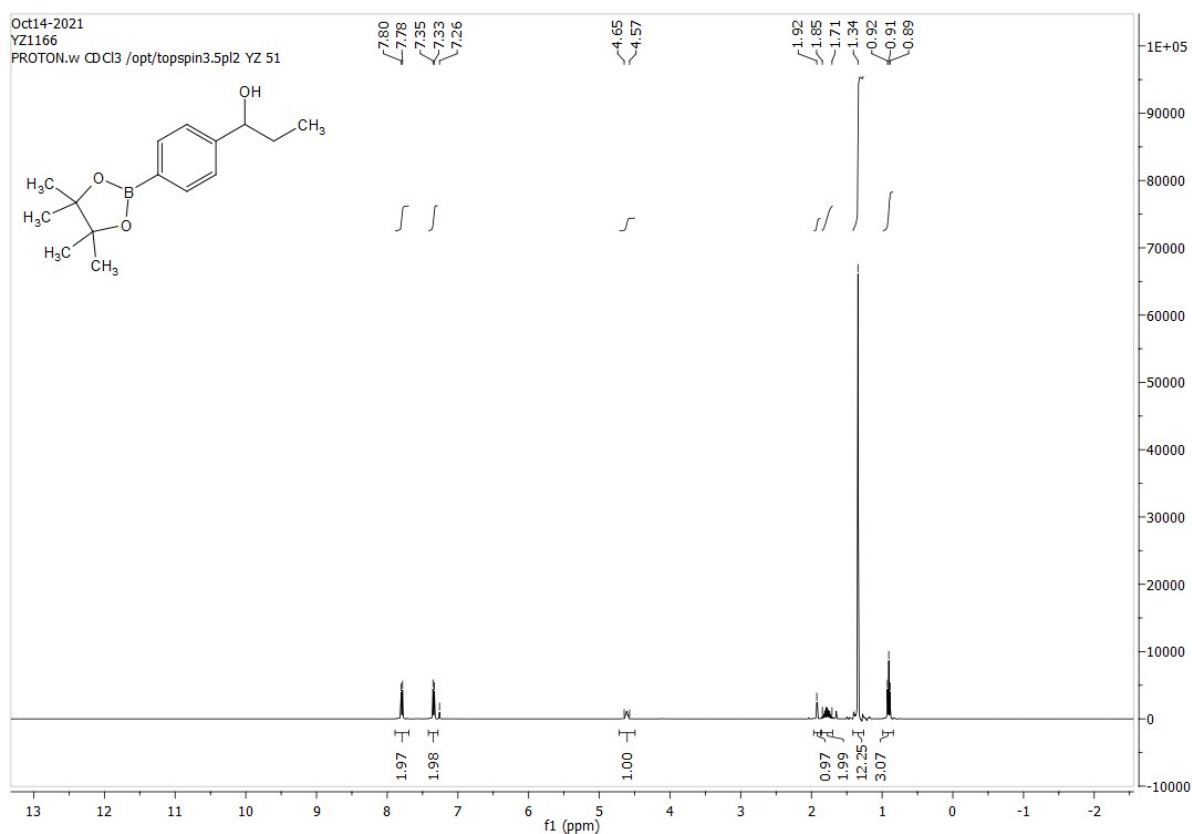

$^{13}\text{C}$  NMR (100 MHz,  $\text{CDCl}_3$ )

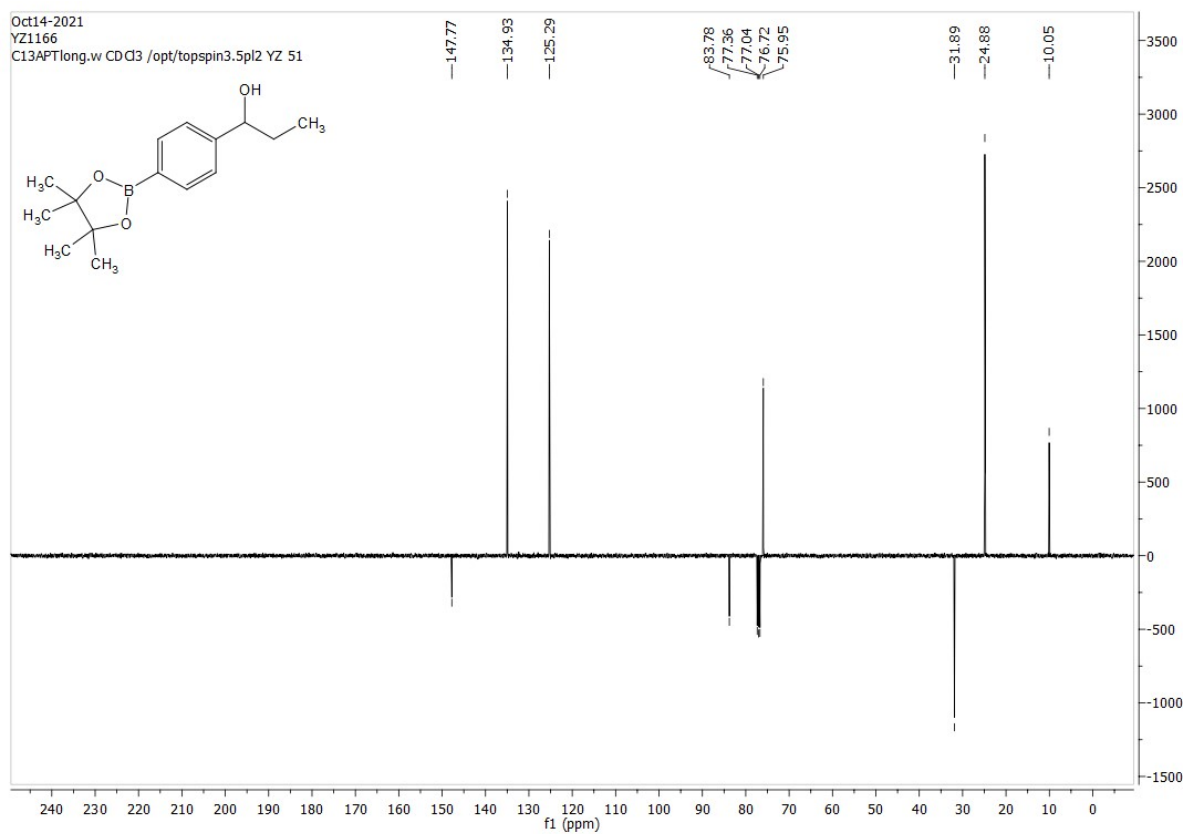

## COSY (400 MHz, CDCl<sub>3</sub>)

YZ1166  
COSY.w CDCl<sub>3</sub> /opt/topspin3.5pl2 YZ 51

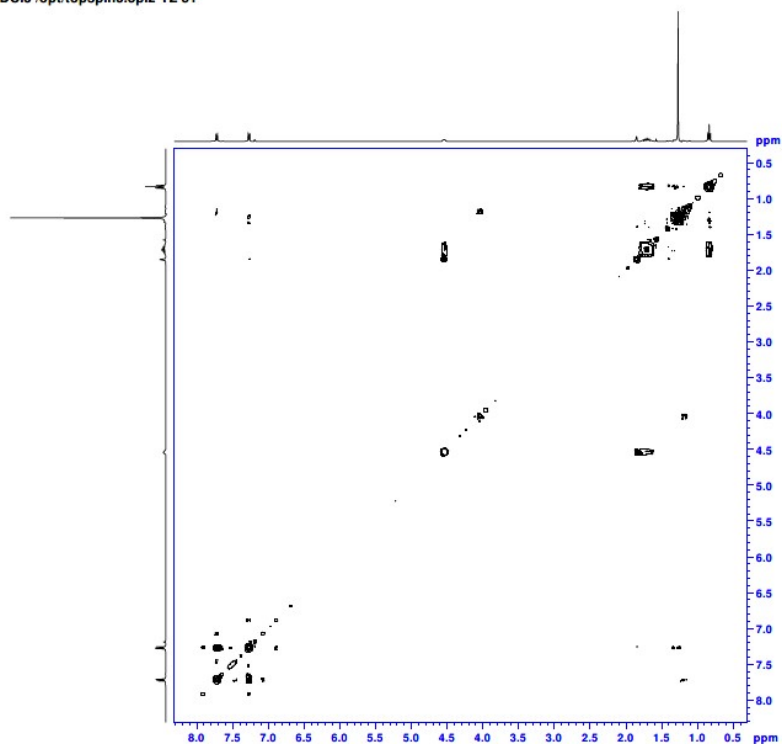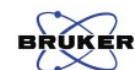

Current Data Parameters  
NAME YZ1166  
EXPNO 1  
PROCNO 1

F2 - Acquisition Parameters  
Date\_ 20110114  
Time 9:48 h  
INSTRUM spect  
PROBHD 1H/13C QNP 400  
PULPROG zgpg30  
TD 65536  
SOLVENT cdcl3  
NS 1  
DS 4  
SWH 3200.128 Hz  
FIDRES 1.140504 Hz  
AQ 0.3194880 sec  
RG 39.37  
SW 4.100 usec  
TE 298.2 K  
DE 0.0000000 sec  
D1 1.8772000 sec  
D11 0.0300000 sec  
D12 0.0000000 sec  
D13 0.0000000 sec  
D16 0.0000000 sec  
D80 0.0000000 sec  
TDav 1  
SFO1 400.1317414 MHz  
NUC1 13C  
P1 14.00 usec  
P17 250.00 usec  
P18 12.92099953 Hz  
P182 2.8139988 Hz  
GPMAN[1] SMO10.100  
GPMAN[2] SMO10.100  
GPMAN[3] SMO10.100  
P16 1000.00 usec

F1 - Acquisition Parameters  
TD 65536  
SFO1 400.1317414 MHz  
FIDRES 1.140504 Hz  
SW 4.100 ppm  
F2 - Processing parameters  
SI 32768  
SF 400.130159 MHz  
WDW EM  
SSB 0  
LB 0 Hz  
GB 0  
PC 1.40

F1 - Processing parameters  
SI 32768  
SF 400.130159 MHz  
WDW EM  
SSB 0  
LB 0 Hz  
GB 0  
PC 1.40

## HSQC (400 MHz, CDCl<sub>3</sub>)

YZ1166  
HSQC.w CDCl<sub>3</sub> /opt/topspin3.5pl2 YZ 51

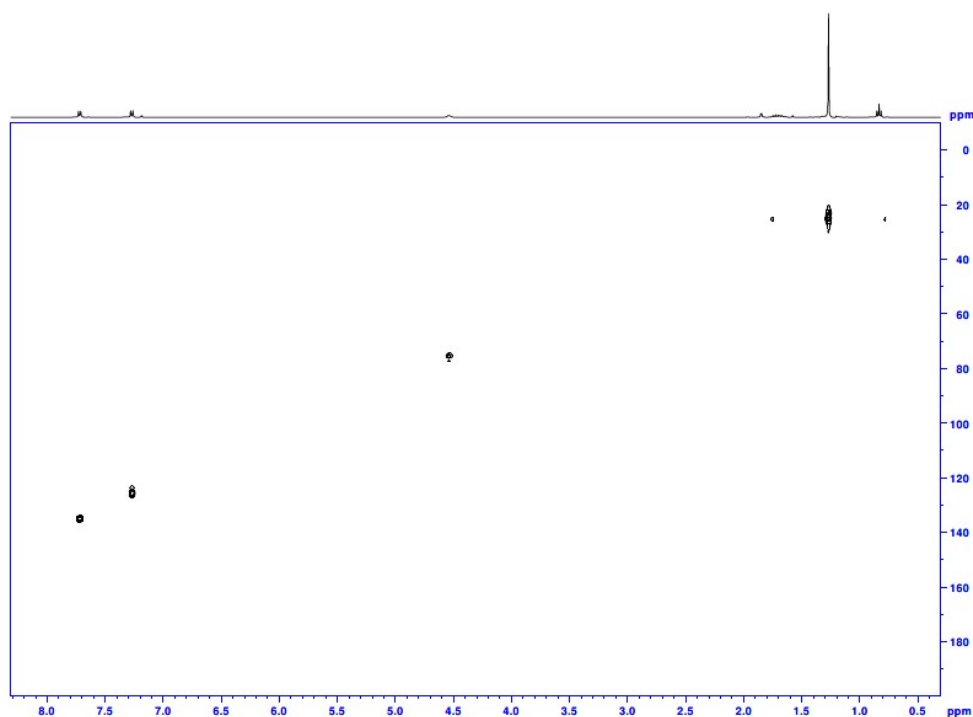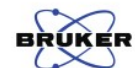

Current Data Parameters  
NAME YZ1166  
EXPNO 1  
PROCNO 1

F2 - Acquisition Parameters  
Date\_ 20110114  
Time 9:52 h  
INSTRUM spect  
PROBHD 1H/13C QNP 400  
PULPROG zgpg30  
TD 65536  
SOLVENT cdcl3  
NS 4  
DS 4  
SWH 3200.128 Hz  
FIDRES 1.140504 Hz  
AQ 0.3194880 sec  
RG 39.37  
SW 4.100 usec  
TE 298.2 K  
DE 0.0000000 sec  
D1 1.8772000 sec  
D11 0.0300000 sec  
D12 0.0000000 sec  
D13 0.0000000 sec  
D16 0.0000000 sec  
D80 0.0000000 sec  
TDav 1  
SFO1 400.1317414 MHz  
NUC1 13C  
P1 14.00 usec  
P17 250.00 usec  
P18 12.92099953 Hz  
P182 2.8139988 Hz  
GPMAN[1] SMO10.100  
GPMAN[2] SMO10.100  
GPMAN[3] SMO10.100  
P16 1000.00 usec

F1 - Acquisition Parameters  
TD 65536  
SFO1 400.1317414 MHz  
FIDRES 1.140504 Hz  
SW 4.100 ppm  
F2 - Processing parameters  
SI 32768  
SF 400.130159 MHz  
WDW EM  
SSB 0  
LB 0 Hz  
GB 0  
PC 1.40

F1 - Processing parameters  
SI 32768  
SF 400.130159 MHz  
WDW EM  
SSB 0  
LB 0 Hz  
GB 0  
PC 1.40

# HMBC (400 MHz, CDCl<sub>3</sub>)

YZ1166  
HMBC.w CDCl<sub>3</sub> /opt/topspin3.5pl2 YZ 51

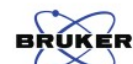

Current Data Parameters  
NAME Oct14-2021  
EXPNO 13  
PROCNO 1

F2 - Acquisition Parameters  
Date\_ 20210114  
Time 9:17 h  
INSTRUM spect  
PROBHD 1H/13C-BB4-1  
PULPROG zgpg30  
TD 65536  
SOLVENT CDCl<sub>3</sub>  
NS 8  
DS 3205.138 Hz  
FIDRES 3.1100008 Hz  
AQ 0.1597485 sec  
RG 201.62  
SW 156.000000 sec  
DE 6.50 usec  
TE 298.2 K  
CNS12 140.0000000 sec  
CNS13 10.0000000 sec  
D1 0.00000000 sec  
D11 0.43854001 sec  
D4 0.00000000 sec  
D14 0.00000000 sec  
D6 0.00000000 sec  
D9 0.00000000 sec  
TD0 400.1317634 MHz  
NUC1 13C  
P1 14.00 usec  
P2 28.00 usec  
P180 12.90099051 W  
P192 100.6244611 MHz  
NUC2 1H  
P3 10.00 usec  
P182 47.37000000 W  
GPM1(1) 2M500.1.100  
GPM1(2) 2M500.1.100  
GPM1(3) 2M500.1.100  
GPM1(4) 40.10 A  
P14 1800.00 usec

F1 - Acquisition parameters  
F1 400.1317634 MHz  
F1RES 204.213700 Hz  
SW 760.155 ppm  
PULPROG zgpg30

F2 - Processing parameters  
SI 32768  
SF 400.1300000 MHz  
WDW 0  
SSB 0  
LB 0 Hz  
GB 0  
PC 1.40

F1 - Processing parameters  
SI 32768  
SF 400.1300000 MHz  
WDW 0  
SSB 0  
LB 0 Hz  
GB 0  
PC 1.40

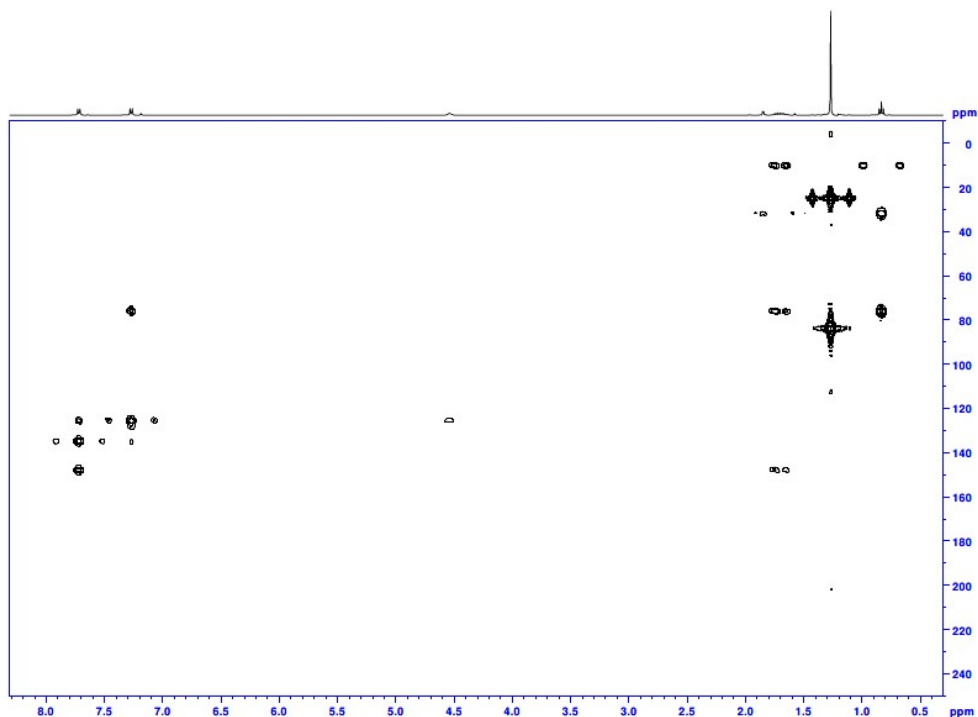

Racemic and (*R*)-1-([1,1'-Biphenyl]-4-yl)propan-1-ol **21**.

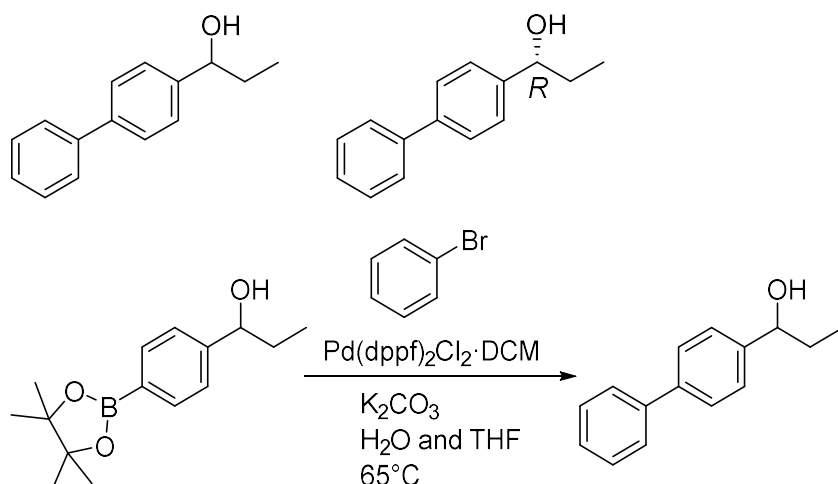

This compound has been reported and fully characterized: Q. Wang, S. Li C.-J. Hou, T.-T. Chu, X.-P. Hu; *Appl. Organomet. Chem.* 2019, **33**, e5108.

**Racemic:** To a solution of racemic 1-(4-(4,4,5,5-tetramethyl-1,3,2-dioxaborolan-2-yl)phenyl)propan-1-ol **14** (90.0 mg, 0.344 mmol), bromobenzene (108 mg, 0.688 mmol) and potassium carbonate (94.9 mg, 0.688 mmol) in THF (6.7 mL) was added  $\text{Pd(dppf)}_2\text{Cl}_2 \cdot \text{DCM}$  (14.1 mg, 0.0172 mmol) and distilled water (0.0433 mL). The reaction mixture was heated to  $65^\circ\text{C}$  and left stirring under the nitrogen atmosphere overnight, followed by TLC (9:1 hexane: EtOAc). The mixture was quenched by distilled water (20 mL). EtOAc (20 mL) was added and the organic layer was separated. The aqueous layer was extracted with EtOAc ( $3 \times 20$  mL), and the combined organic layers were dried ( $\text{MgSO}_4$ ) and filtered. Solvent was removed to give the crude product. The product was isolated via flash chromatography on silica eluted with 0-20% ethyl acetate in hexane to give racemic 1-([1,1'-biphenyl]-4-yl)propan-1-ol **21** as a white solid (45.0 mg, 0.212 mmol, 62%). TLC:  $R_f$  ca 0.20 (9:1 hexane: EtOAc), strong UV and  $\text{KMnO}_4$ ;  $\delta_{\text{H}}$  (500 MHz,  $\text{CDCl}_3$ ) 7.60 (4H, t,  $J = 7.2$ , ArH), 7.47-7.42 (4H, m, ArH), 7.36 (1H, t,  $J = 7.2$ , ArH), 4.65 (1H, t,  $J = 6.4$ , ArCH), 1.97 (1H, s, OH), 1.92-1.76 (2H, m,  $\text{CH}_2$ ), 0.97 (3H, t,  $J = 7.4$ ,  $\text{CH}_3$ ) ppm;  $\delta_{\text{C}}$  (125 MHz,  $\text{CDCl}_3$ ) 143.66 (C), 140.90 (C), 140.45 (C), 128.80 (CH), 127.28 (CH), 127.10 (CH), 126.46 (CH), 75.79 (CH), 31.90 ( $\text{CH}_2$ ), 10.22 ( $\text{CH}_3$ ) ppm;  $m/z$  (ES-API+) 235.1 ( $\text{M}^+ + 23$ , 100%). Data matched that reported.

Enantiomeric excess and conversion determined by HPLC analysis (Chiralcel ADH, 30 cm x 6mm column, hexane:iPrOH 95:5, 1.0 mL/min,  $T = 25^\circ\text{C}$ ) *S* isomer 25.9 min



and *R* isomer 28.7 min. The same column and solvent combination was used in the reference above, permitting determination of the configuration of **21** and also of its precursor, **14**.

Asymmetric: To a solution of (*R*)-1-(4-(4,4,5,5-tetramethyl-1,3,2-dioxaborolan-2-yl)phenyl)propan-1-ol **14** (90.0 mg, 0.344 mmol), bromobenzene (108 mg, 0.688 mmol) and potassium carbonate (94.9 mg, 0.688 mmol) in THF (6.7 mL) was added Pd(dppf)<sub>2</sub>Cl<sub>2</sub>·DCM (14.1 mg, 0.0172 mmol) and distilled water (0.0433 mL). The reaction mixture was heated to 65 °C and left stirring under the nitrogen atmosphere overnight, followed by TLC (9:1 hexane: EtOAc). The mixture was quenched by distilled water (20 mL). EtOAc (20 mL) was added and the organic layer was separated. The aqueous layer was extracted with EtOAc (3 × 20 mL), and the combined organic layers were dried (MgSO<sub>4</sub>) and filtered. Solvent was removed to give the crude product. The product was isolated via flash chromatography on silica eluted with 0-20% ethyl acetate in hexane to give (*R*)-1-([1,1'-biphenyl]-4-yl)propan-1-ol **21** as a white solid (46.0 mg, 0.217 mmol, 63%). The reaction was also followed by HPLC (Chiralcel ADH, 30 cm x 6mm column, hexane:iPrOH 95:5, 1.0 mL/min, T = 25°C): [ $\alpha$ ]<sub>D</sub><sup>23</sup> +35.5 (c 0.300 in DCM) 94% ee (*R*) (lit. [ $\alpha$ ]<sub>D</sub><sup>20</sup> +24.5 (c 1.06 in DCM) 90% ee (*R*)) Reference: Q. Wang, S. Li C.-J. Hou, T.-T. Chu, X.-P. Hu; *Appl. Organomet. Chem.* 2019, **33**, e5108.

$^1\text{H}$  NMR (500 MHz,  $\text{CDCl}_3$ )

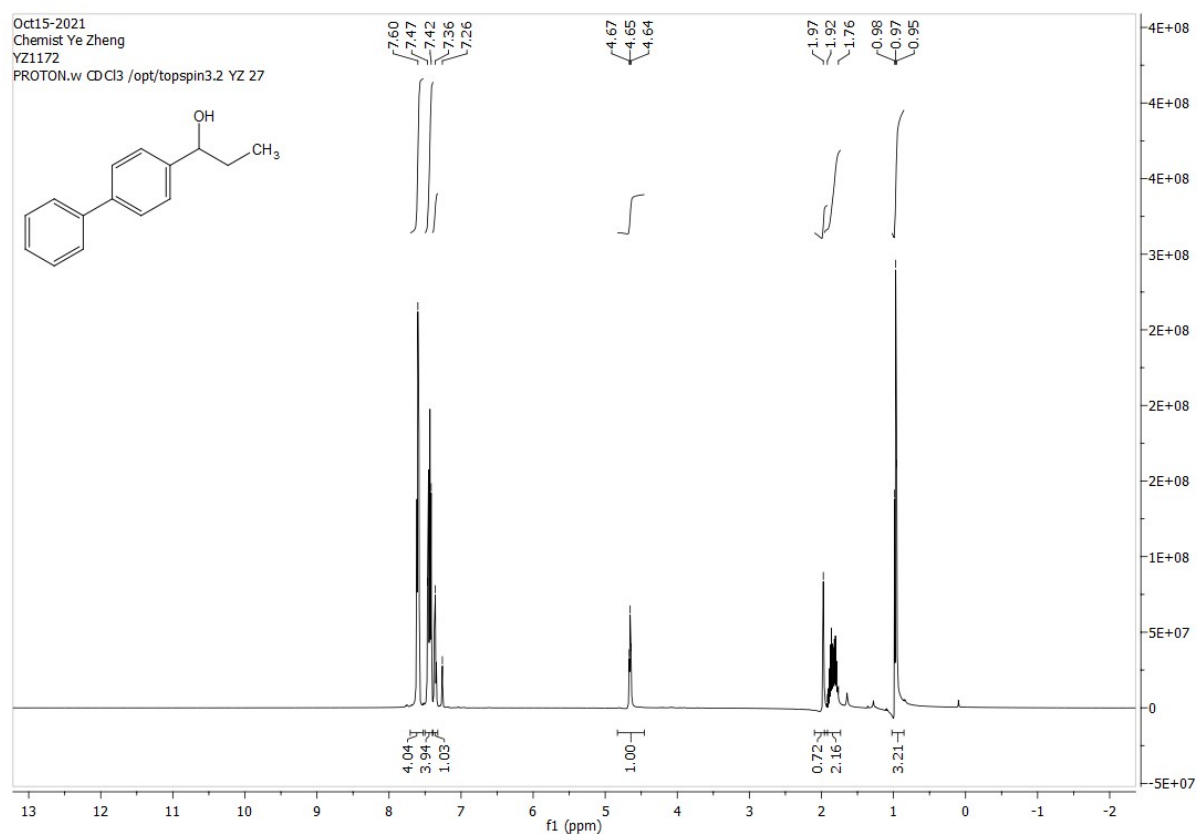

$^{13}\text{C}$  NMR (125 MHz,  $\text{CDCl}_3$ )

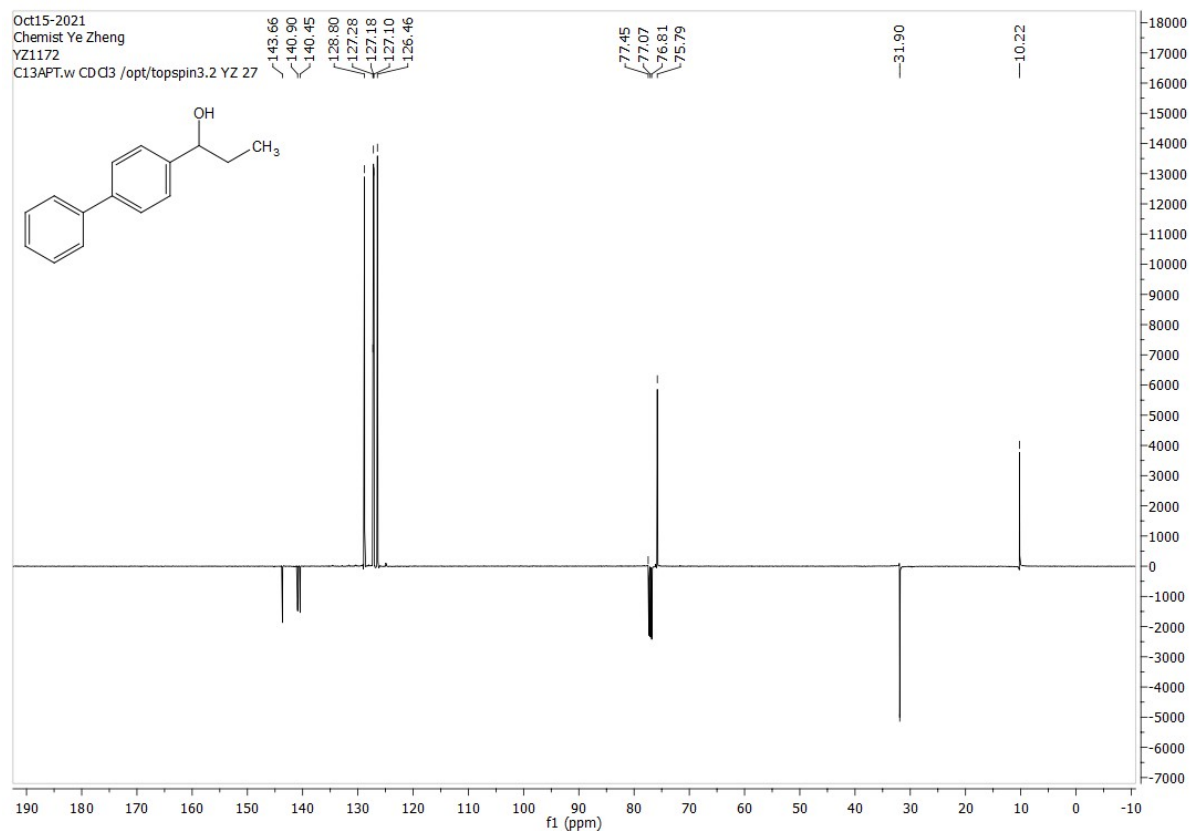

# HPLC of racemic 1-([1,1'-biphenyl]-4-yl)propan-1-ol **21**.

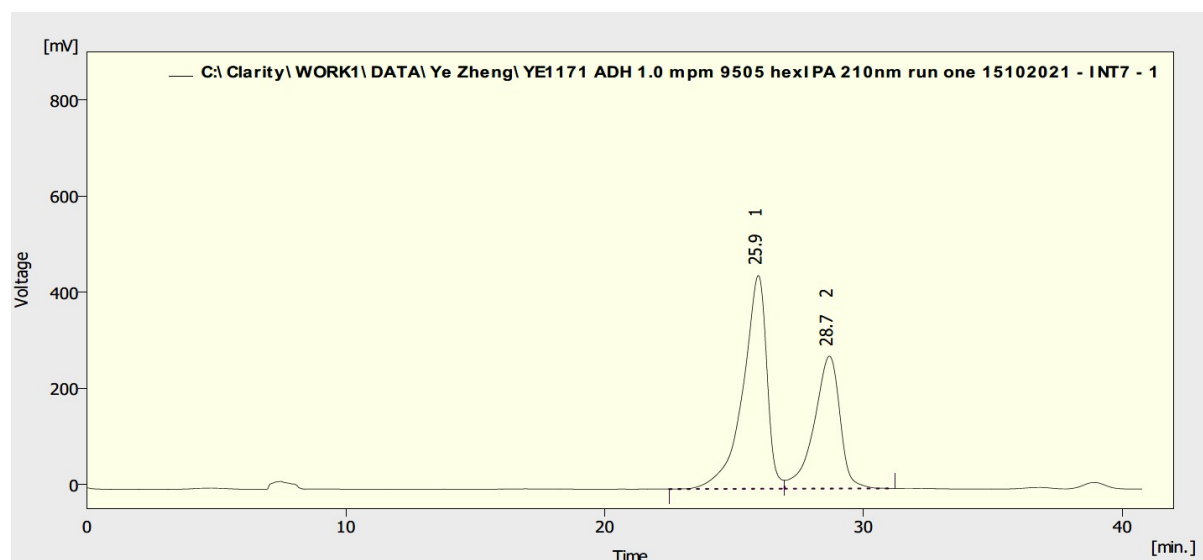

Result Table (Uncal - C:\Clarity\WORK1\DATA\Ye Zheng\YE1171 ADH 1.0 mpm 9505 hexIPA 210nm run one 15102021 - INT7 - 1)

|   | Reten. Time<br>[min] | Area<br>[mV.s] | Height<br>[mV] | Area<br>[%] | Height<br>[%] | W05<br>[min] | Compound<br>Name |
|---|----------------------|----------------|----------------|-------------|---------------|--------------|------------------|
| 1 | 25.937               | 28590.630      | 443.760        | 59.9        | 61.7          | 0.92         |                  |
| 2 | 28.683               | 19152.484      | 275.525        | 40.1        | 38.3          | 1.02         |                  |
|   | Total                | 47743.113      | 719.284        | 100.0       | 100.0         |              |                  |

# HPLC of (*R*)-1-([1,1'-biphenyl]-4-yl)propan-1-ol **21** (94% ee, *R* configuration)

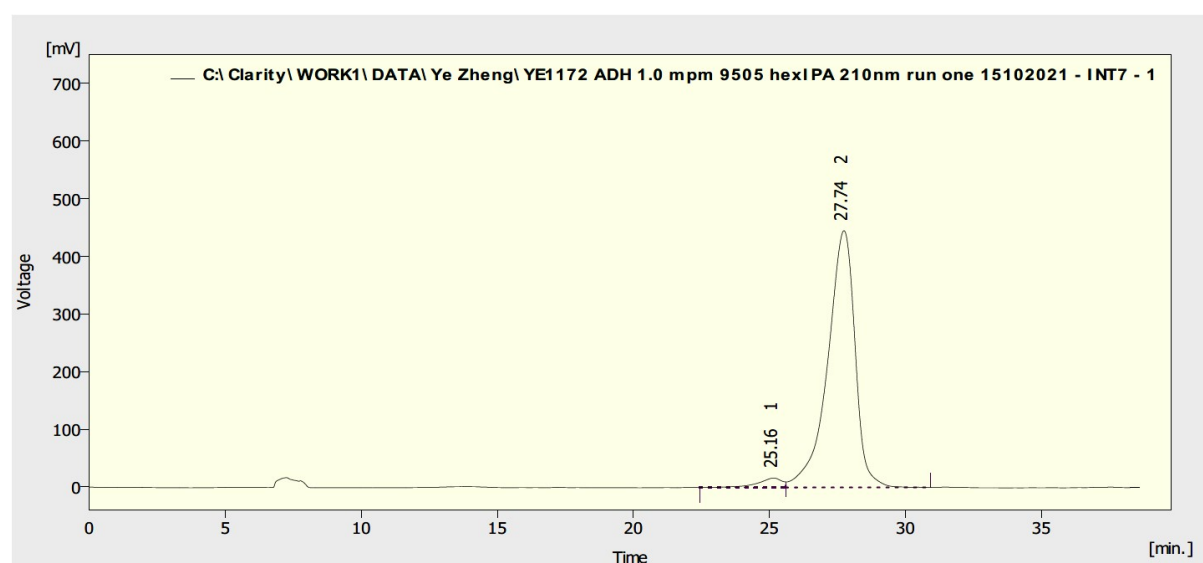

Result Table (Uncal - C:\Clarity\WORK1\DATA\Ye Zheng\YE1172 ADH 1.0 mpm 9505 hexIPA 210nm run one 15102021 - INT7 - 1)

|   | Reten. Time<br>[min] | Area<br>[mV.s] | Height<br>[mV] | Area<br>[%] | Height<br>[%] | W05<br>[min] | Compound<br>Name |
|---|----------------------|----------------|----------------|-------------|---------------|--------------|------------------|
| 1 | 25.160               | 1011.309       | 16.333         | 3.1         | 3.5           | 0.99         |                  |
| 2 | 27.743               | 31229.442      | 445.299        | 96.9        | 96.5          | 1.03         |                  |
|   | Total                | 32240.752      | 461.632        | 100.0       | 100.0         |              |                  |

1-(4-Bromophenyl)-2-morpholinoethan-1-one.

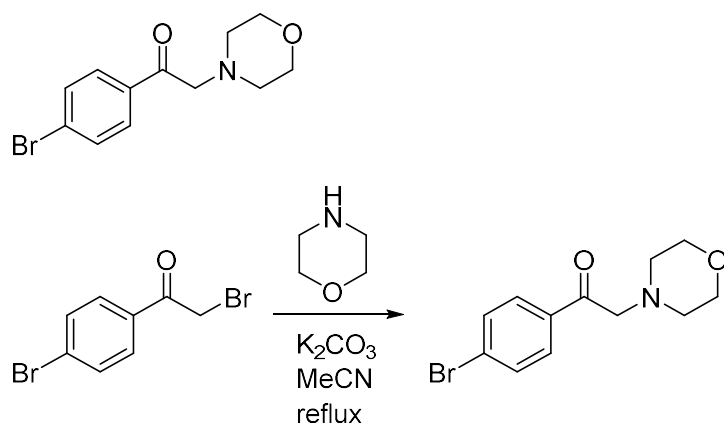

This compound has been reported and fully characterized: C. T. Bahner, E. Kite, F. Pierce, L. M. Rives, M. D. Pickens, C. Myers, *J. Am. Chem. Soc.* 1951, **73**, 4011-4013.

To a solution of 2-bromo-1-(4-bromophenyl)ethan-1-one (2.00 g, 7.25 mmol) in MeCN (40 mL) was added morpholine (948 mg, 10.9 mmol) and potassium carbonate (3.00 g, 21.7 mmol). The reaction mixture was heated to 85 °C and left stirring under a nitrogen atmosphere for 1 hour, followed by TLC (1:1 hexane: EtOAc). The mixture was quenched by distilled water (20 mL). Et<sub>2</sub>O (20 mL) was added and the organic layer was separated. The aqueous layer was extracted with Et<sub>2</sub>O (3 × 20 mL), and the combined organic layers were dried (MgSO<sub>4</sub>) and filtered. Solvent was removed to give the crude product. The product was isolated via flash chromatography on silica eluted with 50-100% ethyl acetate in hexane to give 1-(4-bromophenyl)-2-morpholinoethan-1-one as a yellow solid (1.72 g, 6.08 mmol, 84%). TLC: R<sub>f</sub> ca 0.20 (1:1 hexane: EtOAc), strong UV and KMnO<sub>4</sub>; δ<sub>H</sub> (400 MHz, CDCl<sub>3</sub>) 7.89 (2H, d, *J* = 8.5, ArH), 7.61 (2H, d, *J* = 8.5, ArH), 3.77-3.74 (6H, m, CH<sub>2</sub>), 2.59-2.57 (4H, m, CH<sub>2</sub>) ppm; δ<sub>C</sub> (100 MHz, CDCl<sub>3</sub>) 195.35 (C), 134.61 (C), 131.91 (CH), 129.78 (CH), 128.54 (C), 66.82 (CH<sub>2</sub>), 64.92 (CH<sub>2</sub>), 53.85 (CH<sub>2</sub>) ppm; *m/z* (ES-API<sup>+</sup>) 284.0 (M<sup>+</sup> + 1, 100%). Data matched that reported.

$^1\text{H}$  NMR (400 MHz,  $\text{CDCl}_3$ )

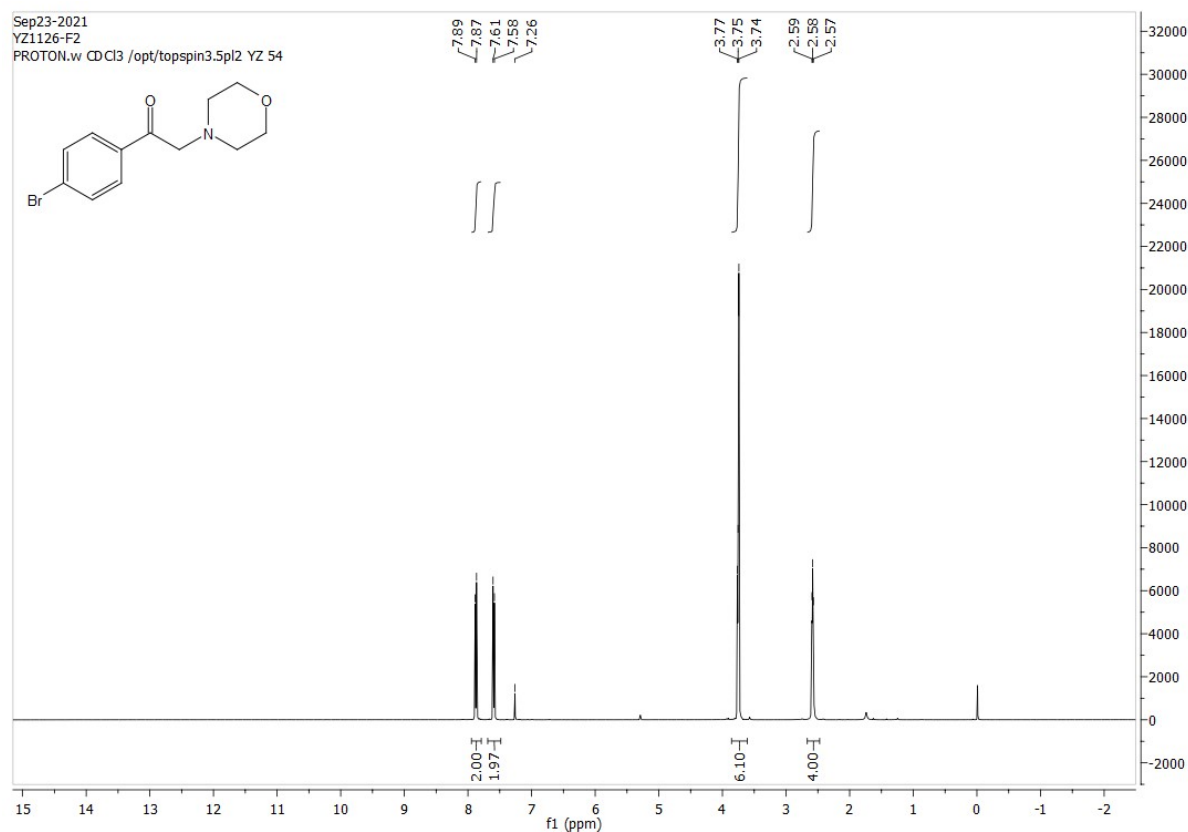

$^{13}\text{C}$  NMR (100 MHz,  $\text{CDCl}_3$ )

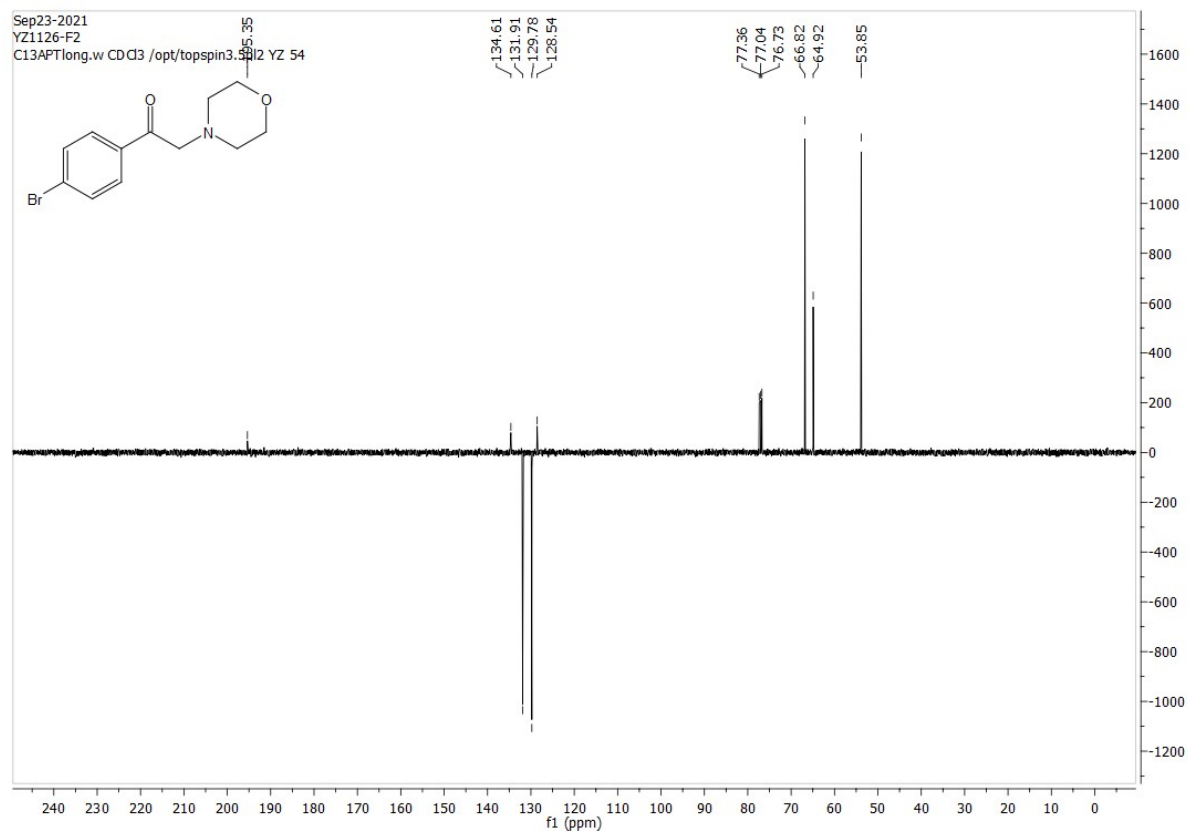

2-Morpholino-1-(4-(4,4,5,5-tetramethyl-1,3,2-dioxaborolan-2-yl)phenyl)ethan-1-one.

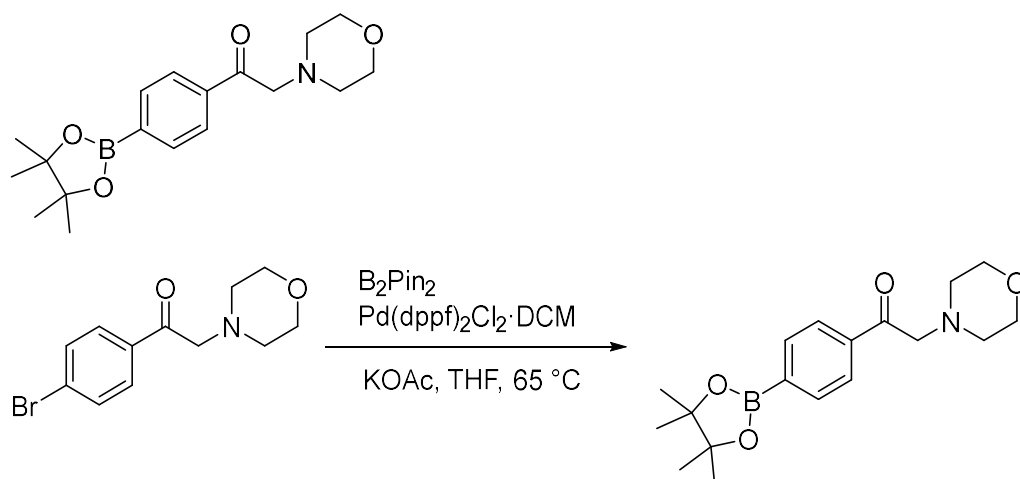

This compound is novel.

A round-bottom flask was charged with 1-(4-bromophenyl)-2-morpholinoethan-1-one (1.72 g, 6.07 mmol), bis(pinacolato)diboron (1.85 g, 7.28 mmol), potassium acetate (1.78 g, 18.2 mmol), THF (30 mL) and  $Pd(dppf)_2Cl_2 \cdot DCM$  (248 mg, 0.304 mmol).

The reaction mixture was heated to 65 °C and left stirring under the nitrogen atmosphere overnight, followed by TLC (1:1 hexane: EtOAc). The mixture was quenched by distilled water (20 mL). EtOAc (20 mL) was added and the organic layer was separated. The aqueous layer was extracted with EtOAc (3 × 20 mL), and the combined organic layers were dried ( $MgSO_4$ ) and filtered. Solvent was removed to give the crude product. The product was isolated via flash chromatography on silica eluted with 50-100% ethyl acetate in hexane to give 2-morpholino-1-(4-(4,4,5,5-tetramethyl-1,3,2-dioxaborolan-2-yl)phenyl)ethan-1-one as an orange solid (1.20 g, 3.63 mmol, 60%). TLC:  $R_f$  ca 0.20 (1:1 hexane: EtOAc), strong UV and  $KMnO_4$ ; Mp: 69 °C; HRMS: (found (ESI<sup>+</sup>):  $[M+H]^+$ , Calcd for  $C_{18}H_{27}BNO_4$  332.2023; Found 332.2028; 2.0 ppm error;  $\nu_{max}$  2977, 1697, 1508, 1452, 1397, 1357, 1217, 1142, 1115, 1088, 856  $cm^{-1}$ ;  $\delta_H$  (400 MHz,  $CDCl_3$ ) 7.96 (2H, d,  $J$  = 8.1, ArH), 7.89 (2H, d,  $J$  = 8.1, ArH), 3.82 (2H, s,  $CH_2$ ), 3.78-3.76 (4H, m,  $CH_2$ ), 2.62-2.60 (4H, m,  $CH_2$ ), 1.35 (12H, s,  $CH_3$ ) ppm;  $\delta_C$  (100 MHz,  $CDCl_3$ ) 196.44 (C), 137.85 (C), 134.90 (CH), 127.05 (CH), 84.25 (C), 66.38 ( $CH_2$ ), 64.79 ( $CH_2$ ), 53.88 ( $CH_2$ ), 24.87 ( $CH_3$ ) ppm;  $m/z$  (ES-API<sup>+</sup>) 332.2 ( $M^+ + 1$ , 100%).

Enantiomeric excess and conversion determined by HPLC analysis (Chiralpak IC, 30 cm x 6mm column, hexane:iPrOH 90:10, 1.0 mL/min,  $T$  = 25°C) ketone 14.8 min, *R* and *S* isomers 15.7 min and 17.3 min.

<sup>1</sup>H NMR (400 MHz, CDCl<sub>3</sub>)

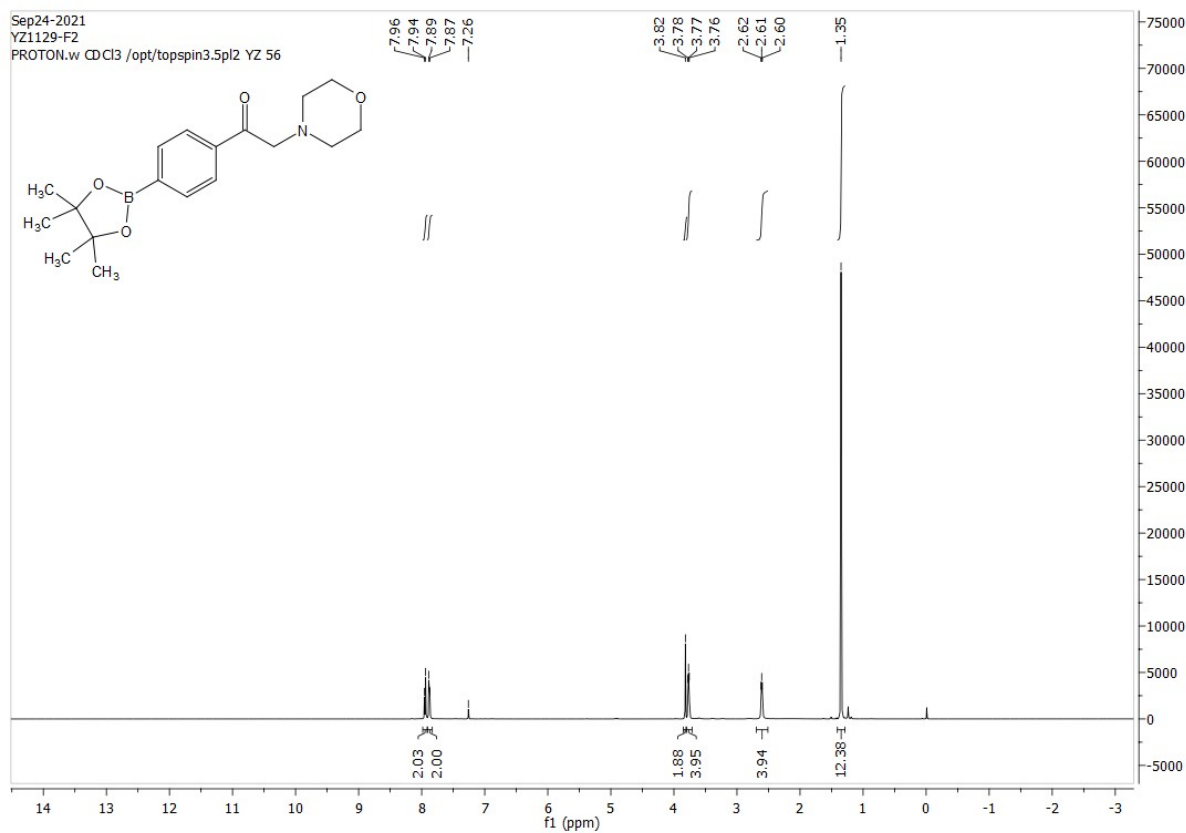

<sup>13</sup>C NMR (100 MHz, CDCl<sub>3</sub>)

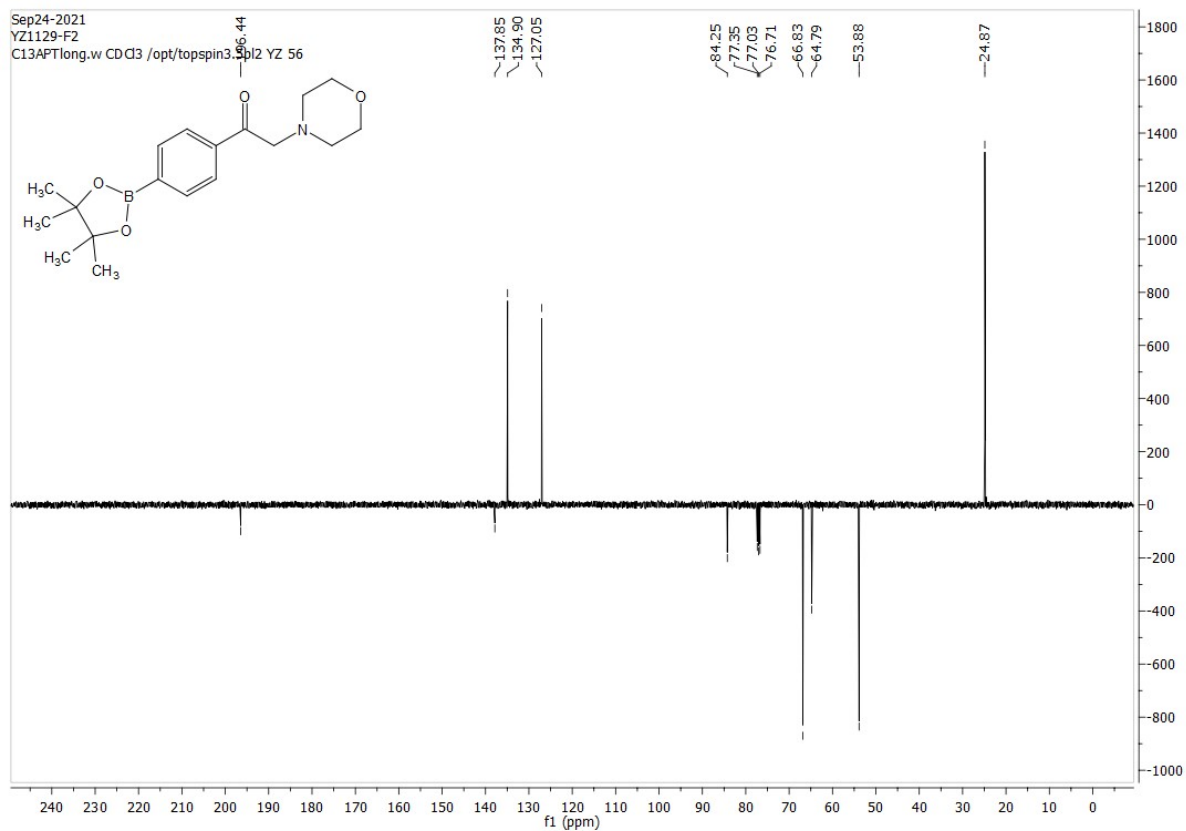

YZ1129-F2  
COSY.w CDC13 /opt/topspin3.5pl2 YZ 56

**BRUKER**

Current Data Parameters  
NAME Sep24-2021  
EXPNO 21  
PROCNO 1

F2 - Acquisition Parameters  
Date\_ 20210924  
Time 14.18 s  
INSTRUM spect  
PROBHD 2106416\_0444  
PULPROG zgpg30  
TD 65536  
SOLVENT CDC13  
NS 1  
DS 14  
SWH 3703.754 Hz  
FIDRES 1.604449 Hz  
AQ 0.3744602 sec  
RG 64.18  
SW 135.000 MHz  
DE 4.30 usec  
TE 300.3 K  
D0 0.0000300 sec  
D1 1.9201719 sec  
D11 0.0300000 sec  
D12 0.0000000 sec  
D13 0.0000400 sec  
D16 0.0000000 sec  
180 0.0007000 sec  
TDwav 1  
SF01 400.1314179 MHz  
WQC1 1.0  
P0 14.00 usec  
P1 14.00 usec  
P17 2500.00 usec  
PLA1 12.8309853 s  
PLA10 2.8139889 s  
GRAM(1) SMOUL-1C2  
GF1 10.00 s  
P14 1000.00 usec

F1 - Acquisition parameters  
TD 128  
SF01 400.1314179 MHz  
FIDRES 28.95114 Hz  
AQ 0.3744602 sec  
PROCNO 07

F2 - Processing parameters  
SI 3274  
SF 400.1300770 MHz  
WCM 0  
LS 0 Hz  
GB 0  
PC 1.40

F1 - Processing parameters  
SI 1024  
SF 400.1300770 MHz  
WCM 0  
LS 0 Hz  
GB 0

ppm

ppm

YZ1129-F2  
HSQC.w CDCI3 /opt/topspin3.5pl2 YZ 56

**BRUKER**

Current Data Parameters  
NAME Sample-0021  
EXPNO 22  
PROCNO 1

F2 - Acquisition Parameters  
Date\_ 20220924  
Time 14.38.30  
INSTRUM spect  
PROBHD ZI08X1.000  
PULPROG zgpg30  
TD 1024  
FIDRES 1024  
AQ 0.1382400 sec  
RG 250.42  
SW 150.000 usec  
SE 4.50 usec  
TE 298.2 K  
CSTRT2 145.0000000 sec  
DO 0.00000000 sec  
D1 1.40000000 sec  
D4 0.00170000 sec  
D11 0.00000000 sec  
S14 0.00000000 sec  
S16 0.00000000 sec  
S18 0.00000000 sec  
S19 0.00000000 sec  
S20 0.00000000 sec  
S21 0.00000000 sec  
S22 0.00000000 sec  
S23 0.00000000 sec  
S24 0.00000000 sec  
S25 0.00000000 sec  
S26 0.00000000 sec  
S27 0.00000000 sec  
S28 0.00000000 sec  
S29 0.00000000 sec  
S30 0.00000000 sec  
S31 0.00000000 sec  
S32 0.00000000 sec  
S33 0.00000000 sec  
S34 0.00000000 sec  
S35 0.00000000 sec  
S36 0.00000000 sec  
S37 0.00000000 sec  
S38 0.00000000 sec  
S39 0.00000000 sec  
S40 0.00000000 sec  
S41 0.00000000 sec  
S42 0.00000000 sec  
S43 0.00000000 sec  
S44 0.00000000 sec  
S45 0.00000000 sec  
S46 0.00000000 sec  
S47 0.00000000 sec  
S48 0.00000000 sec  
S49 0.00000000 sec  
S50 0.00000000 sec  
S51 0.00000000 sec  
S52 0.00000000 sec  
S53 0.00000000 sec  
S54 0.00000000 sec  
S55 0.00000000 sec  
S56 0.00000000 sec  
S57 0.00000000 sec  
S58 0.00000000 sec  
S59 0.00000000 sec  
S60 0.00000000 sec  
S61 0.00000000 sec  
S62 0.00000000 sec  
S63 0.00000000 sec  
S64 0.00000000 sec  
S65 0.00000000 sec  
S66 0.00000000 sec  
S67 0.00000000 sec  
S68 0.00000000 sec  
S69 0.00000000 sec  
S70 0.00000000 sec  
S71 0.00000000 sec  
S72 0.00000000 sec  
S73 0.00000000 sec  
S74 0.00000000 sec  
S75 0.00000000 sec  
S76 0.00000000 sec  
S77 0.00000000 sec  
S78 0.00000000 sec  
S79 0.00000000 sec  
S80 0.00000000 sec  
S81 0.00000000 sec  
S82 0.00000000 sec  
S83 0.00000000 sec  
S84 0.00000000 sec  
S85 0.00000000 sec  
S86 0.00000000 sec  
S87 0.00000000 sec  
S88 0.00000000 sec  
S89 0.00000000 sec  
S90 0.00000000 sec  
S91 0.00000000 sec  
S92 0.00000000 sec  
S93 0.00000000 sec  
S94 0.00000000 sec  
S95 0.00000000 sec  
S96 0.00000000 sec  
S97 0.00000000 sec  
S98 0.00000000 sec  
S99 0.00000000 sec  
S100 0.00000000 sec  
S101 0.00000000 sec  
S102 0.00000000 sec  
S103 0.00000000 sec  
S104 0.00000000 sec  
S105 0.00000000 sec  
S106 0.00000000 sec  
S107 0.00000000 sec  
S108 0.00000000 sec  
S109 0.00000000 sec  
S110 0.00000000 sec  
S111 0.00000000 sec  
S112 0.00000000 sec  
S113 0.00000000 sec  
S114 0.00000000 sec  
S115 0.00000000 sec  
S116 0.00000000 sec  
S117 0.00000000 sec  
S118 0.00000000 sec  
S119 0.00000000 sec  
S120 0.00000000 sec  
S121 0.00000000 sec  
S122 0.00000000 sec  
S123 0.00000000 sec  
S124 0.00000000 sec  
S125 0.00000000 sec  
S126 0.00000000 sec  
S127 0.00000000 sec  
S128 0.00000000 sec  
S129 0.00000000 sec  
S130 0.00000000 sec  
S131 0.00000000 sec  
S132 0.00000000 sec  
S133 0.00000000 sec  
S134 0.00000000 sec  
S135 0.00000000 sec  
S136 0.00000000 sec  
S137 0.00000000 sec  
S138 0.00000000 sec  
S139 0.00000000 sec  
S140 0.00000000 sec  
S141 0.00000000 sec  
S142 0.00000000 sec  
S143 0.00000000 sec  
S144 0.00000000 sec  
S145 0.00000000 sec  
S146 0.00000000 sec  
S147 0.00000000 sec  
S148 0.00000000 sec  
S149 0.00000000 sec  
S150 0.00000000 sec  
S151 0.00000000 sec  
S152 0.00000000 sec  
S153 0.00000000 sec  
S154 0.00000000 sec  
S155 0.00000000 sec  
S156 0.00000000 sec  
S157 0.00000000 sec  
S158 0.00000000 sec  
S159 0.00000000 sec  
S160 0.00000000 sec  
S161 0.00000000 sec  
S162 0.00000000 sec  
S163 0.00000000 sec  
S164 0.00000000 sec  
S165 0.00000000 sec  
S166 0.00000000 sec  
S167 0.00000000 sec  
S168 0.00000000 sec  
S169 0.00000000 sec  
S170 0.00000000 sec  
S171 0.00000000 sec  
S172 0.00000000 sec  
S173 0.00000000 sec  
S174 0.00000000 sec  
S175 0.00000000 sec  
S176 0.00000000 sec  
S177 0.00000000 sec  
S178 0.00000000 sec  
S179 0.00000000 sec  
S180 0.00000000 sec  
S181 0.00000000 sec  
S182 0.00000000 sec  
S183 0.00000000 sec  
S184 0.00000000 sec  
S185 0.00000000 sec  
S186 0.00000000 sec  
S187 0.00000000 sec  
S188 0.00000000 sec  
S189 0.00000000 sec  
S190 0.00000000 sec  
S191 0.00000000 sec  
S192 0.00000000 sec  
S193 0.00000000 sec  
S194 0.00000000 sec  
S195 0.00000000 sec  
S196 0.00000000 sec  
S197 0.00000000 sec  
S198 0.00000000 sec  
S199 0.00000000 sec  
S200 0.00000000 sec  
S201 0.00000000 sec  
S202 0.00000000 sec  
S203 0.00000000 sec  
S204 0.00000000 sec  
S205 0.00000000 sec  
S206 0.00000000 sec  
S207 0.00000000 sec  
S208 0.00000000 sec  
S209 0.00000000 sec  
S210 0.00000000 sec  
S211 0.00000000 sec  
S212 0.00000000 sec  
S213 0.00000000 sec  
S214 0.00000000 sec  
S215 0.00000000 sec  
S216 0.00000000 sec  
S217 0.00000000 sec  
S218 0.00000000 sec  
S219 0.00000000 sec  
S220 0.00000000 sec  
S221 0.00000000 sec  
S222 0.00000000 sec  
S223 0.00000000 sec  
S224 0.00000000 sec  
S225 0.00000000 sec  
S226 0.00000000 sec  
S227 0.00000000 sec  
S228 0.00000000 sec  
S229 0.00000000 sec  
S230 0.00000000 sec  
S231 0.00000



YZ1129-F2  
HMBC.w CDCI3 /opt/topspin3.5pl2 YZ 56

**BRUKER**

Current Data Parameters  
NAME Sep14-1021  
EXPNO 23  
PROCNO 1

F2 - Acquisition Parameters  
Data\_ 20210924  
Time 15.31.5  
INSTRUM spect  
PROBHD Z1061R\_046 1  
PULPROG zgpg30 hmcgpr1p002  
TD 10024  
FIDRES 0.00017  
AQ 0.1382405 sec  
RG 251.62  
SW 130.050 MHz  
SE 4.50 MHz  
TE 298.2 K  
DWT2 145.0000000  
CNU13 10.0000000  
DO 0.000001000 sec  
DI 1.44004405 sec  
DQ 0.001480000 sec  
DA 0.000000000 sec  
D16 0.000000000 sec  
DS 0.0001992 sec  
TDW 400.1314111 MHz  
MDC2 0  
F1 14.00 MHz  
F2 28.00 MHz  
F1A2 12.02099515 MHz  
SF02 100.6248411 MHz  
MDC2 15C  
F3 47.37500000 MHz  
F1A2 47.37500000 MHz  
GPRAM[1] SMOQ1.0.100  
GPR1 50.000 MHz  
GPRAM[2] SMOQ1.0.100  
GPR2 50.000 MHz  
GPRAM[3] SMOQ1.0.100  
GPR3 40.100 MHz  
F16 1000.00 MHz

F1 - Acquisition parameters  
TD 128  
SF02 100.62484 MHz  
FIDRES 0.0001705 Hz  
SW 240.153 MHz  
PULPROG zgpg30

F2 - Processing parameters  
SI 2048  
SF 400.1300077 MHz  
RG 251.62  
LB 0 Hz  
GB 0 Hz  
PC 1.40

F1 - Processing parameters  
SI 1024  
SF 100.6127045 MHz  
RG 251.62  
LB 0 Hz  
GB 0 Hz

— C:\Clarity\WORK1\DATA\Ye Zheng\YE1129 IC 1.0 mpm 9010 hex\PA 210nm run one 27092021 - INT7 - 1

14.75

3.5

1

250

200

150

100

50

0

0 5 10 15 20 25 30 35

Time [min.]

Voltage [mV]

|   | Reten. Time<br>[min] | Area<br>[mV.s] | Height<br>[mV] | Area<br>[%] | Height<br>[%] | W05<br>[min] | Compound<br>Name |
|---|----------------------|----------------|----------------|-------------|---------------|--------------|------------------|
| 1 | 14.753               | 6931.430       | 213.911        | 100.0       | 100.0         | 0.50         |                  |
|   | Total                | 6931.430       | 213.911        | 100.0       | 100.0         |              |                  |

Racemic and (*S*)-2-Morpholino-1-(4-(4,4,5,5-tetramethyl-1,3,2-dioxaborolan-2-yl)phenyl)ethan-1-ol **15**.

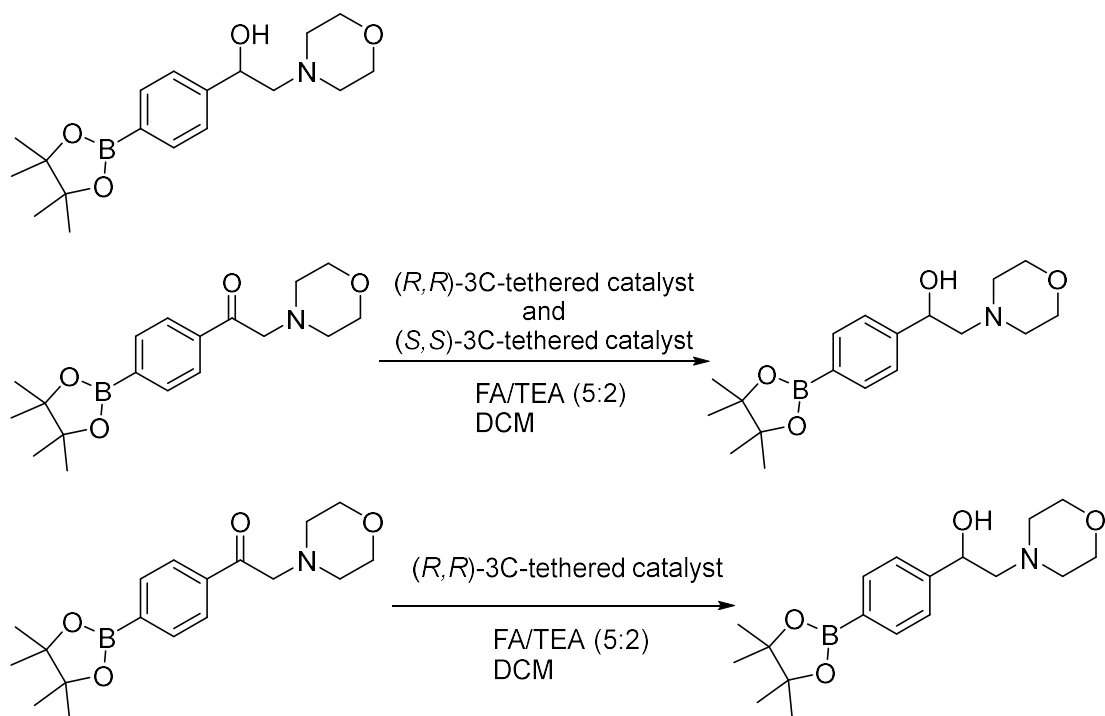

This compound is novel.

#### Synthesis of a racemic standard:

(*R,R*)-3C-Tethered Ru(II)-TsDPEN catalyst **2** (0.75 mg, 1.2  $\mu$ mol, 0.5 mol%) and (*S,S*)-3C-tethered Ru(II)-TsDPEN catalyst **2** (0.75 mg, 1.2  $\mu$ mol, 0.5 mol%) were added to FA: TEA (5:2 azeotropic mixture, 0.36 mL) at rt and the mixture was stirred under a nitrogen atmosphere for 15 minutes; after which a solution of 2-morpholino-1-(4-(4,4,5,5-tetramethyl-1,3,2-dioxaborolan-2-yl)phenyl)ethan-1-one (80.0 mg, 0.242 mmol) in DCM (0.50 mL) was added. The reaction mixture was stirred under a nitrogen atmosphere and followed by TLC (5:95 MeOH: DCM). After 72 hours, the reaction was quenched using saturated NaHCO<sub>3</sub> solution (20 mL). EtOAc (20 mL) was added and the organic layer was separated. The aqueous layer was extracted with EtOAc (3 x 20 mL) and the combined organic layers were dried (MgSO<sub>4</sub>) and filtered. The solvent was removed to give the crude product. The product was isolated via flash chromatography on silica eluted with 0-5% MeOH in DCM to give 2-morpholino-1-(4-(4,4,5,5-tetramethyl-1,3,2-dioxaborolan-2-yl)phenyl)ethan-1-ol **15** as a yellow oil (43.2 mg, 0.130 mmol, 54%). TLC: R<sub>f</sub> ca 0.20 (5:95 MeOH: DCM), strong UV and KMnO<sub>4</sub>; HRMS: (found (ESI<sup>+</sup>): [M+H]<sup>+</sup>, Calcd for C<sub>18</sub>H<sub>29</sub>BNO<sub>4</sub> 334.2179; Found 334.2184; 2.5 ppm error;  $\nu_{\text{max}}$  3432 (br), 2973, 2854, 1391, 1356,

1319, 1144, 1113, 1086, 1070, 1016, 871  $\text{cm}^{-1}$ ;  $\delta_{\text{H}}$  (500 MHz,  $\text{CDCl}_3$ ) 7.80 (2H, d,  $J = 7.9$ , ArH), 7.39 (2H, d,  $J = 7.9$ , ArH), 4.77 (1H, dd,  $J = 10.3, 5.3$ , ArCH), 3.79-3.70 (4H, m,  $\text{CH}_2$ ), 2.73 (2H, d,  $J = 3.8$ ,  $\text{CH}_2$ ), 2.55 (1H, dd,  $J = 12.5, 3.4$ ,  $\text{CH}_2$ ), 2.47-2.42 (3H, m,  $\text{CH}_2$ ), 1.34 (12H, s,  $\text{CH}_3$ ) ppm;  $\delta_{\text{C}}$  (125 MHz,  $\text{CDCl}_3$ ) 145.15 (C), 134.91 (CH), 125.08 (CH), 83.78 (C), 68.56 (CH), 67.05 ( $\text{CH}_2$ ), 66.54 ( $\text{CH}_2$ ), 53.46 ( $\text{CH}_2$ ), 24.87 ( $\text{CH}_3$ ) ppm;  $m/z$  (ES-API+) 334.2 ( $\text{M}^+ + 1$ , 100%).

Enantiomeric excess and conversion determined by HPLC analysis (Chiralpak IC, 30 cm x 6mm column, hexane:iPrOH 90:10, 1.0 mL/min,  $T = 25^\circ\text{C}$ ) ketone 14.8 min, *R* and *S* isomers 15.7 min and 17.3 min. Configuration was assigned by analogy with **12**.

ATH of 2-morpholino-1-(4-(4,4,5,5-tetramethyl-1,3,2-dioxaborolan-2-yl)phenyl)ethan-1-one):

(*R,R*)-3C-tethered Ru(II)-TsDPEN catalyst **2** (1.5 mg, 2.4  $\mu\text{mol}$ , 1 mol%) was added to FA: TEA (5:2 azeotropic mixture, 0.36 mL) at rt and the mixture was stirred under a nitrogen atmosphere for 15 minutes; after which a solution of 2-morpholino-1-(4-(4,4,5,5-tetramethyl-1,3,2-dioxaborolan-2-yl)phenyl)ethan-1-one (80.0 mg, 0.242 mmol) in DCM (0.50 mL) was added. The reaction mixture was stirred under a nitrogen atmosphere and followed by TLC (5:95 MeOH: DCM). After 72 hours, the reaction was quenched using saturated  $\text{NaHCO}_3$  solution (20 mL). EtOAc (20 mL) was added and the organic layer was separated. The aqueous layer was extracted with EtOAc (3 x 20 mL) and the combined organic layers were dried ( $\text{MgSO}_4$ ) and filtered. The solvent was removed to give the crude product. The product was isolated via flash chromatography on silica eluted with 0-5% MeOH in DCM to give (*S*)-2-morpholino-1-(4-(4,4,5,5-tetramethyl-1,3,2-dioxaborolan-2-yl)phenyl)ethan-1-ol **15** as a yellow oil (46.8 mg, 0.141 mmol, 58%). The reaction was also followed by HPLC (Chiralpak IC, 30 cm x 6mm column, hexane:iPrOH 90:10, 1.0 mL/min,  $T = 25^\circ\text{C}$ ):  $[\alpha]_{\text{D}}^{24} +44.3$  (c 0.263 in  $\text{CHCl}_3$ ) 99% ee.

$^1\text{H}$  NMR (500 MHz,  $\text{CDCl}_3$ )

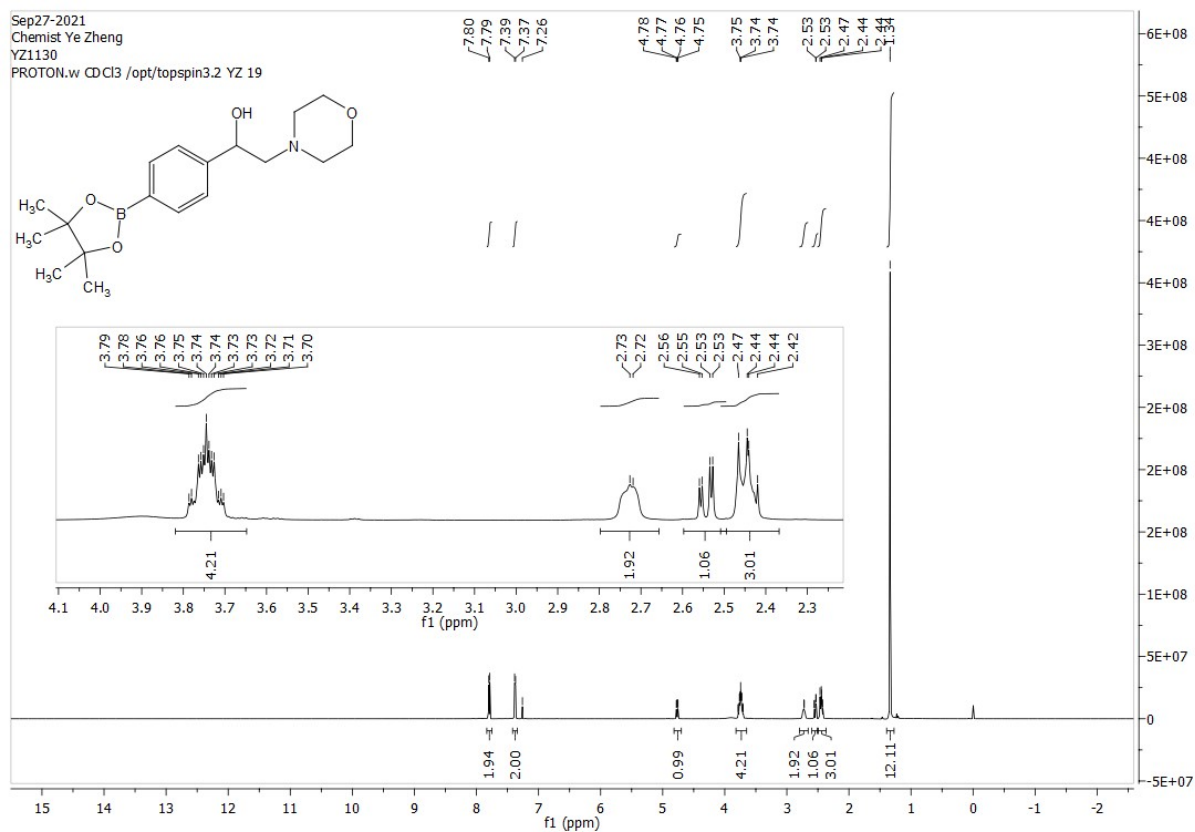

$^{13}\text{C}$  NMR (125 MHz,  $\text{CDCl}_3$ )

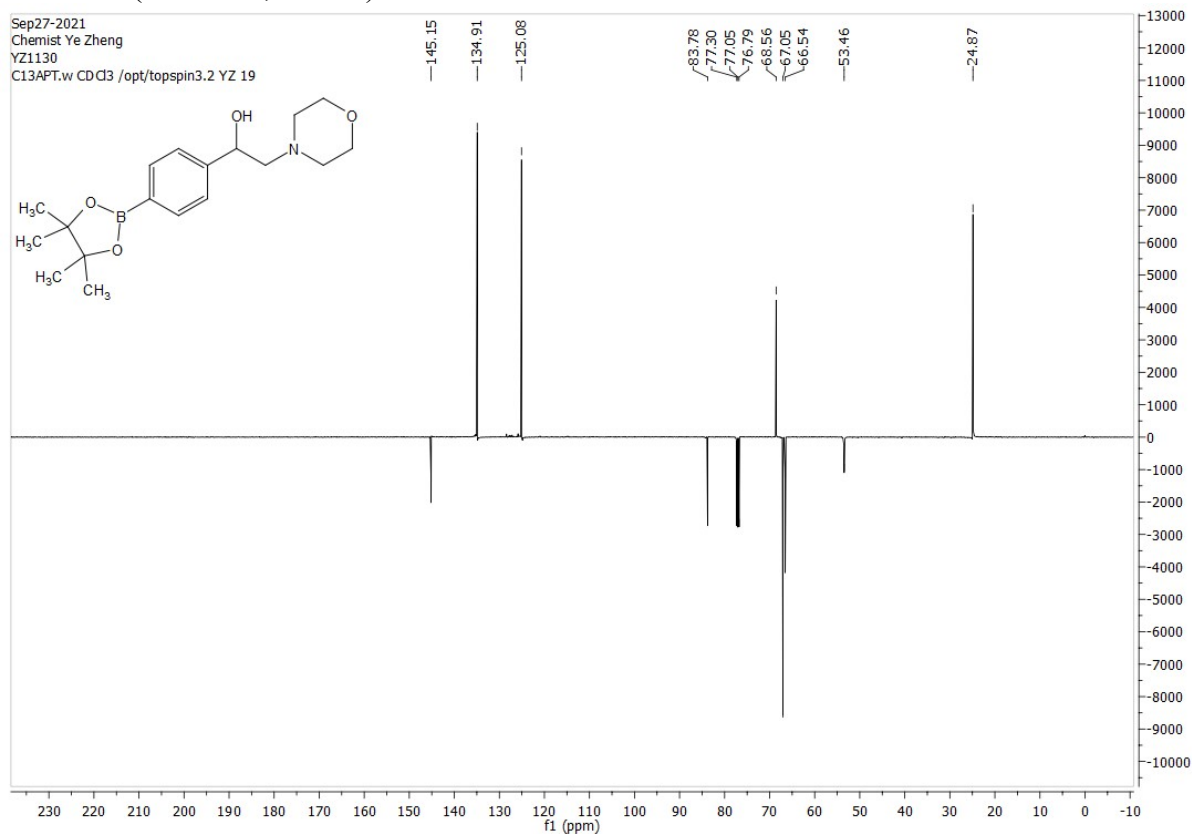

## COSY (500 MHz, CDCl<sub>3</sub>)

Chemist Ye Zheng  
YZ1130  
COSY.w CDCl<sub>3</sub> /opt/topspin3.2 YZ 19

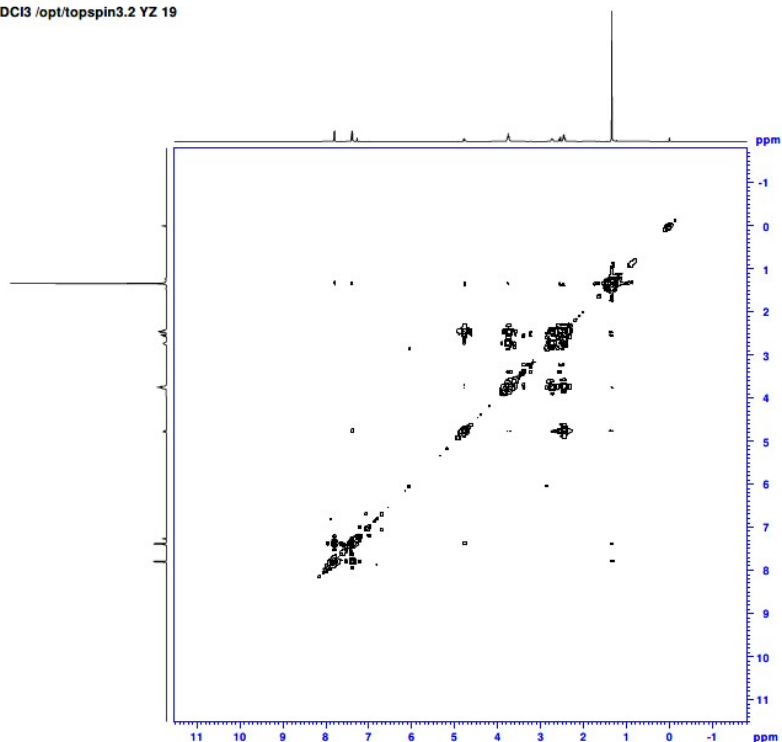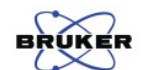

```
Current Data Parameters
NAME      Sep17-2021
EXPNO     1
PROCNO    1

F2 - Acquisition Parameters
Date_     20210927
Time      17.48
INSTRUM   spect
PROBHD    5 mm CPDPR 13C
PULPROG   zgpg30
TD         65536
SOLVENT   CDCl3
NS         2
DS         4
SWH        6410.481 Hz
FIDRES     0.1514000 Hz
AQ         0.1514000 sec
RG         327.41
DE         17.41
TE         300.2 K
DQ         40.00
DD         0.00000000 sec
DI1        1.99000000 sec
DI2        0.00000000 sec
DI3        0.00000000 sec
DI4        0.00000000 sec
DI5        0.00000000 sec
DI6        0.00000000 sec
DI7        0.00000000 sec
DI8        0.00000000 sec
DI9        0.00000000 sec
DI10       0.00000000 sec

===== CHANNEL F1 =====
NUC1       13C
P1         9.10 usec
P2         9.10 usec
P17        20.00 usec
P18        13.00000000 sec
P19        1.50249997 sec

===== GRADIENT CHANNEL =====
GR1PRG1    SMOUL-100
GR1PRG2    SMOUL-100
GR1PRG3    SMOUL-100
GR1PRG4    SMOUL-100
GR1PRG5    SMOUL-100
GR1PRG6    SMOUL-100
GR1PRG7    SMOUL-100
GR1PRG8    SMOUL-100
GR1PRG9    SMOUL-100
GR1PRG10   SMOUL-100
GR1PRG11   SMOUL-100
GR1PRG12   SMOUL-100
GR1PRG13   SMOUL-100
GR1PRG14   SMOUL-100
GR1PRG15   SMOUL-100
GR1PRG16   SMOUL-100
GR1PRG17   SMOUL-100
GR1PRG18   SMOUL-100
GR1PRG19   SMOUL-100
GR1PRG20   SMOUL-100
GR1PRG21   SMOUL-100
GR1PRG22   SMOUL-100
GR1PRG23   SMOUL-100
GR1PRG24   SMOUL-100
GR1PRG25   SMOUL-100
GR1PRG26   SMOUL-100
GR1PRG27   SMOUL-100
GR1PRG28   SMOUL-100
GR1PRG29   SMOUL-100
GR1PRG30   SMOUL-100
GR1PRG31   SMOUL-100
GR1PRG32   SMOUL-100
GR1PRG33   SMOUL-100
GR1PRG34   SMOUL-100
GR1PRG35   SMOUL-100
GR1PRG36   SMOUL-100
GR1PRG37   SMOUL-100
GR1PRG38   SMOUL-100
GR1PRG39   SMOUL-100
GR1PRG40   SMOUL-100
GR1PRG41   SMOUL-100
GR1PRG42   SMOUL-100
GR1PRG43   SMOUL-100
GR1PRG44   SMOUL-100
GR1PRG45   SMOUL-100
GR1PRG46   SMOUL-100
GR1PRG47   SMOUL-100
GR1PRG48   SMOUL-100
GR1PRG49   SMOUL-100
GR1PRG50   SMOUL-100
GR1PRG51   SMOUL-100
GR1PRG52   SMOUL-100
GR1PRG53   SMOUL-100
GR1PRG54   SMOUL-100
GR1PRG55   SMOUL-100
GR1PRG56   SMOUL-100
GR1PRG57   SMOUL-100
GR1PRG58   SMOUL-100
GR1PRG59   SMOUL-100
GR1PRG60   SMOUL-100
GR1PRG61   SMOUL-100
GR1PRG62   SMOUL-100
GR1PRG63   SMOUL-100
GR1PRG64   SMOUL-100
GR1PRG65   SMOUL-100
GR1PRG66   SMOUL-100
GR1PRG67   SMOUL-100
GR1PRG68   SMOUL-100
GR1PRG69   SMOUL-100
GR1PRG70   SMOUL-100
GR1PRG71   SMOUL-100
GR1PRG72   SMOUL-100
GR1PRG73   SMOUL-100
GR1PRG74   SMOUL-100
GR1PRG75   SMOUL-100
GR1PRG76   SMOUL-100
GR1PRG77   SMOUL-100
GR1PRG78   SMOUL-100
GR1PRG79   SMOUL-100
GR1PRG80   SMOUL-100
GR1PRG81   SMOUL-100
GR1PRG82   SMOUL-100
GR1PRG83   SMOUL-100
GR1PRG84   SMOUL-100
GR1PRG85   SMOUL-100
GR1PRG86   SMOUL-100
GR1PRG87   SMOUL-100
GR1PRG88   SMOUL-100
GR1PRG89   SMOUL-100
GR1PRG90   SMOUL-100
GR1PRG91   SMOUL-100
GR1PRG92   SMOUL-100
GR1PRG93   SMOUL-100
GR1PRG94   SMOUL-100
GR1PRG95   SMOUL-100
GR1PRG96   SMOUL-100
GR1PRG97   SMOUL-100
GR1PRG98   SMOUL-100
GR1PRG99   SMOUL-100
GR1PRG100  SMOUL-100

F1 - Acquisition parameters
SI         1024
SF         500.1301004 MHz
WDW        EM
SSB        0 Hz
GB         0
PC         1.40

F1 - Processing parameters
SI         1024
SF         500.1301004 MHz
WDW        EM
SSB        0 Hz
GB         0
PC         1.40
```

## HSQC (500 MHz, CDCl<sub>3</sub>)

Chemist Ye Zheng  
YZ1130  
HSQC.w CDCl<sub>3</sub> /opt/topspin3.2 YZ 19

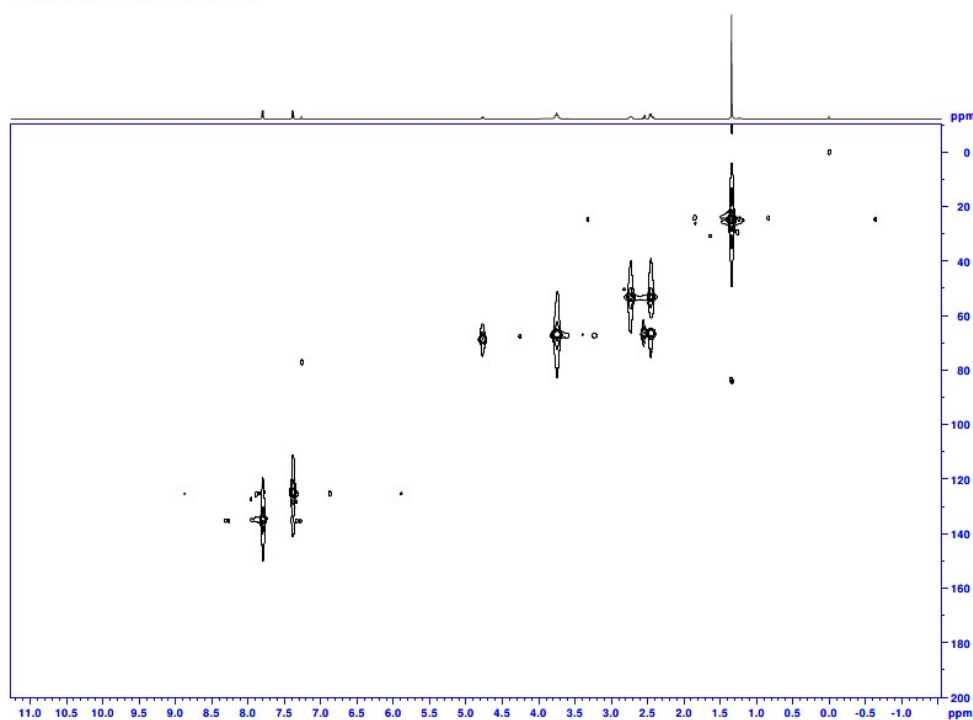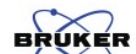

```
Current Data Parameters
NAME      Sep17-2021
EXPNO     1
PROCNO    1

F2 - Acquisition Parameters
Date_     20210927
Time      17.48
INSTRUM   spect
PROBHD    5 mm CPDPR 13C
PULPROG   zgpg30
TD         65536
SOLVENT   CDCl3
NS         2
DS         4
SWH        6410.481 Hz
FIDRES     0.1514000 Hz
AQ         0.1514000 sec
RG         327.41
DE         17.41
TE         300.2 K
DQ         40.00
DD         0.00000000 sec
DI1        1.99000000 sec
DI2        0.00000000 sec
DI3        0.00000000 sec
DI4        0.00000000 sec
DI5        0.00000000 sec
DI6        0.00000000 sec
DI7        0.00000000 sec
DI8        0.00000000 sec
DI9        0.00000000 sec
DI10       0.00000000 sec

===== CHANNEL F1 =====
NUC1       13C
P1         9.10 usec
P2         9.10 usec
P17        20.00 usec
P18        13.00000000 sec
P19        1.50249997 sec

===== GRADIENT CHANNEL =====
GR1PRG1    SMOUL-100
GR1PRG2    SMOUL-100
GR1PRG3    SMOUL-100
GR1PRG4    SMOUL-100
GR1PRG5    SMOUL-100
GR1PRG6    SMOUL-100
GR1PRG7    SMOUL-100
GR1PRG8    SMOUL-100
GR1PRG9    SMOUL-100
GR1PRG10   SMOUL-100
GR1PRG11   SMOUL-100
GR1PRG12   SMOUL-100
GR1PRG13   SMOUL-100
GR1PRG14   SMOUL-100
GR1PRG15   SMOUL-100
GR1PRG16   SMOUL-100
GR1PRG17   SMOUL-100
GR1PRG18   SMOUL-100
GR1PRG19   SMOUL-100
GR1PRG20   SMOUL-100
GR1PRG21   SMOUL-100
GR1PRG22   SMOUL-100
GR1PRG23   SMOUL-100
GR1PRG24   SMOUL-100
GR1PRG25   SMOUL-100
GR1PRG26   SMOUL-100
GR1PRG27   SMOUL-100
GR1PRG28   SMOUL-100
GR1PRG29   SMOUL-100
GR1PRG30   SMOUL-100
GR1PRG31   SMOUL-100
GR1PRG32   SMOUL-100
GR1PRG33   SMOUL-100
GR1PRG34   SMOUL-100
GR1PRG35   SMOUL-100
GR1PRG36   SMOUL-100
GR1PRG37   SMOUL-100
GR1PRG38   SMOUL-100
GR1PRG39   SMOUL-100
GR1PRG40   SMOUL-100
GR1PRG41   SMOUL-100
GR1PRG42   SMOUL-100
GR1PRG43   SMOUL-100
GR1PRG44   SMOUL-100
GR1PRG45   SMOUL-100
GR1PRG46   SMOUL-100
GR1PRG47   SMOUL-100
GR1PRG48   SMOUL-100
GR1PRG49   SMOUL-100
GR1PRG50   SMOUL-100
GR1PRG51   SMOUL-100
GR1PRG52   SMOUL-100
GR1PRG53   SMOUL-100
GR1PRG54   SMOUL-100
GR1PRG55   SMOUL-100
GR1PRG56   SMOUL-100
GR1PRG57   SMOUL-100
GR1PRG58   SMOUL-100
GR1PRG59   SMOUL-100
GR1PRG60   SMOUL-100
GR1PRG61   SMOUL-100
GR1PRG62   SMOUL-100
GR1PRG63   SMOUL-100
GR1PRG64   SMOUL-100
GR1PRG65   SMOUL-100
GR1PRG66   SMOUL-100
GR1PRG67   SMOUL-100
GR1PRG68   SMOUL-100
GR1PRG69   SMOUL-100
GR1PRG70   SMOUL-100
GR1PRG71   SMOUL-100
GR1PRG72   SMOUL-100
GR1PRG73   SMOUL-100
GR1PRG74   SMOUL-100
GR1PRG75   SMOUL-100
GR1PRG76   SMOUL-100
GR1PRG77   SMOUL-100
GR1PRG78   SMOUL-100
GR1PRG79   SMOUL-100
GR1PRG80   SMOUL-100
GR1PRG81   SMOUL-100
GR1PRG82   SMOUL-100
GR1PRG83   SMOUL-100
GR1PRG84   SMOUL-100
GR1PRG85   SMOUL-100
GR1PRG86   SMOUL-100
GR1PRG87   SMOUL-100
GR1PRG88   SMOUL-100
GR1PRG89   SMOUL-100
GR1PRG90   SMOUL-100
GR1PRG91   SMOUL-100
GR1PRG92   SMOUL-100
GR1PRG93   SMOUL-100
GR1PRG94   SMOUL-100
GR1PRG95   SMOUL-100
GR1PRG96   SMOUL-100
GR1PRG97   SMOUL-100
GR1PRG98   SMOUL-100
GR1PRG99   SMOUL-100
GR1PRG100  SMOUL-100

F1 - Acquisition parameters
SI         1024
SF         500.1301004 MHz
WDW        EM
SSB        0 Hz
GB         0
PC         1.40

F1 - Processing parameters
SI         1024
SF         500.1301004 MHz
WDW        EM
SSB        0 Hz
GB         0
PC         1.40
```

# HMBC (500 MHz, CDCl<sub>3</sub>)

Chemist Ye Zheng  
YZ1130  
HMBC.w CDCl<sub>3</sub>/opt/topspin3.2 YZ 19

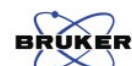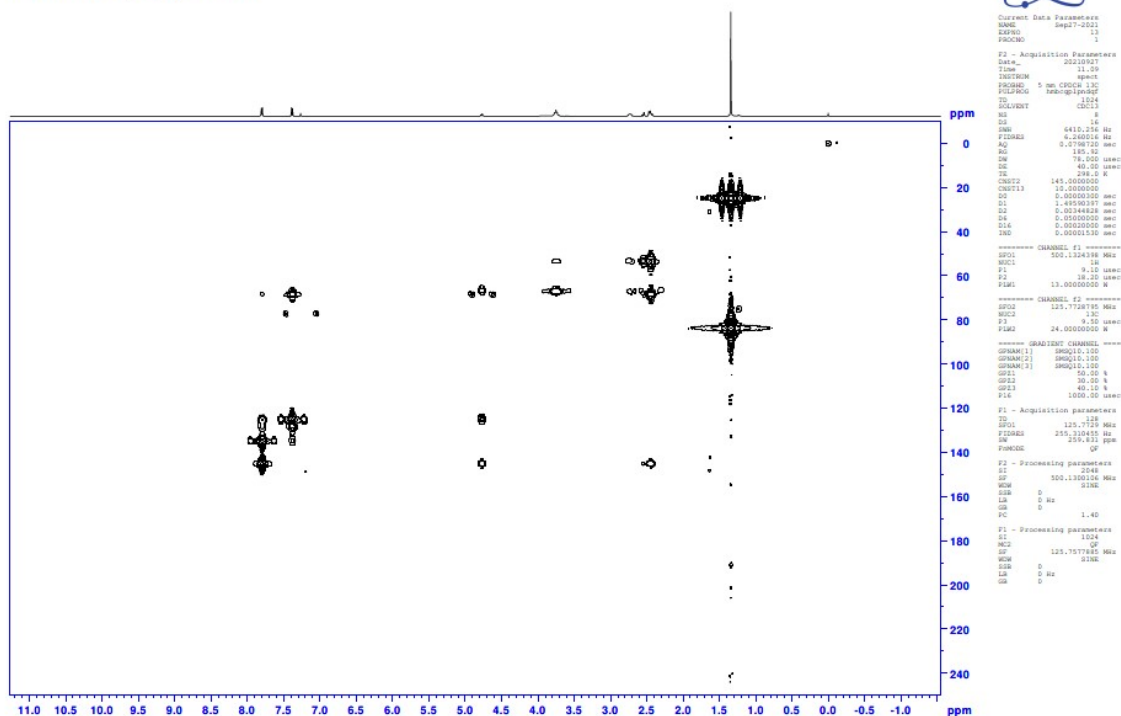

## HPLC of racemic 2-morpholino-1-(4-(4,4,5,5-tetramethyl-1,3,2-dioxaborolan-2-yl)phenyl)ethan-1-ol **15**.

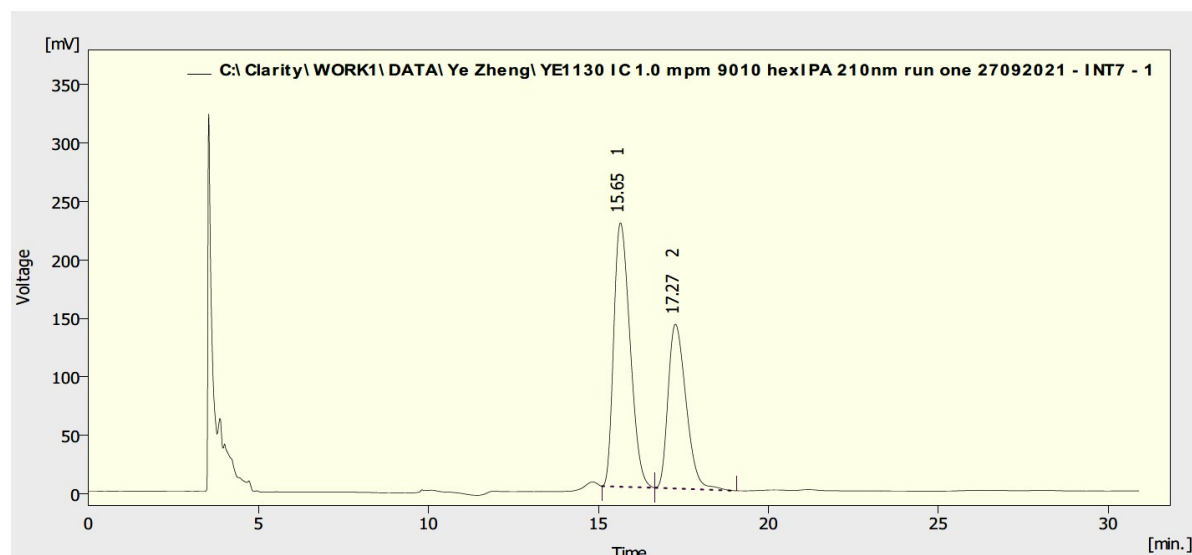

Result Table (Uncal - C:\Clarity\WORK1\DATA\Ye Zheng\YE1130 IC 1.0 ppm 9010 hexIPA 210nm run one 27092021 - INT7 - 1)

|   | Reten. Time<br>[min] | Area<br>[mV.s] | Height<br>[mV] | Area<br>[%] | Height<br>[%] | W05<br>[min] | Compound<br>Name |
|---|----------------------|----------------|----------------|-------------|---------------|--------------|------------------|
| 1 | 15.650               | 7523.293       | 225.931        | 59.2        | 61.6          | 0.53         |                  |
| 2 | 17.267               | 5186.478       | 140.707        | 40.8        | 38.4          | 0.57         |                  |
|   | Total                | 12709.771      | 366.638        | 100.0       | 100.0         |              |                  |

HPLC after ATH of 2-morpholino-1-(4-(4,4,5,5-tetramethyl-1,3,2-dioxaborolan-2-yl)phenyl)ethan-1-one using (*R,R*)-3C-Tethered Ru(II)-TsDPEN catalyst **2** (after 72 hours, 100% conversion, 99% ee).

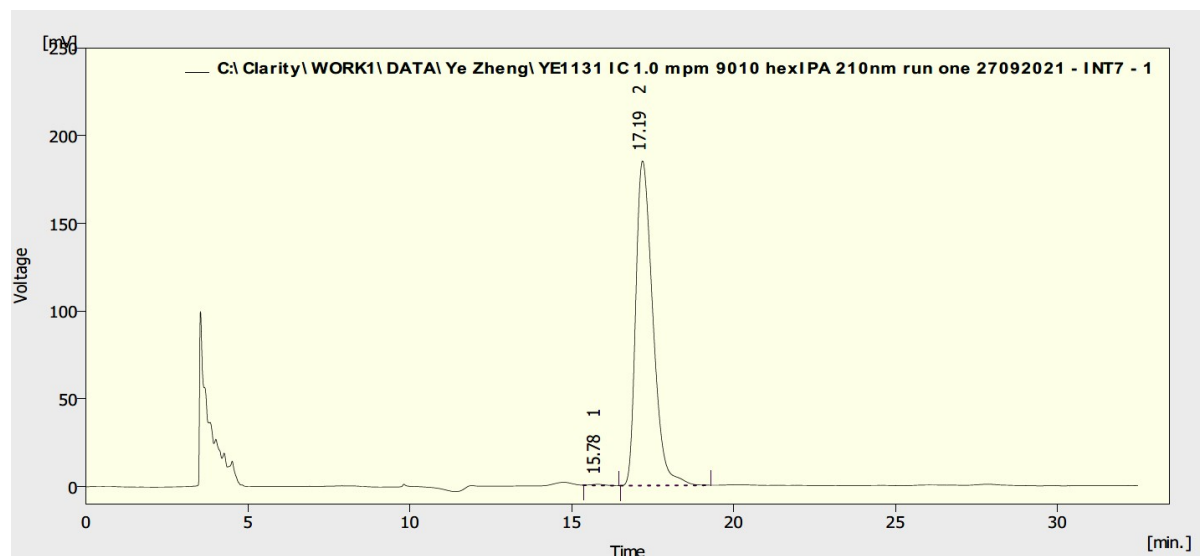

Result Table (Uncal - C:\Clarity\WORK1\DATA\Ye Zheng\YE1131 IC 1.0 mpm 9010 hexIPA 210nm run one 27092021 - INT7 - 1)

|   | Reten. Time<br>[min] | Area<br>[mV.s] | Height<br>[mV] | Area<br>[%] | Height<br>[%] | W05<br>[min] | Compound<br>Name |
|---|----------------------|----------------|----------------|-------------|---------------|--------------|------------------|
| 1 | 15.777               | 18.359         | 0.647          | 0.3         | 0.3           | 0.45         |                  |
| 2 | 17.190               | 6784.357       | 185.156        | 99.7        | 99.7          | 0.56         |                  |
|   | Total                | 6802.716       | 185.803        | 100.0       | 100.0         |              |                  |

1-(2-(4,4,5,5-Tetramethyl-1,3,2-dioxaborolan-2-yl)phenyl)ethan-1-one **16**.

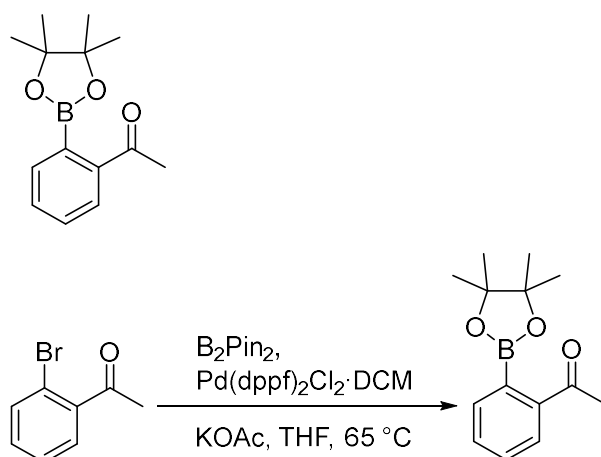

This compound has been reported and fully characterized: N. Su, T. Deng, D. J. Wink and T. G. Driver, *Org. Lett.* 2017, **19**, 3990-3993.

A round-bottom flask was charged with 2'-bromoacetophenone (398 mg, 2.00 mmol), bis(pinacolato)diboron (610 mg, 2.40 mmol), potassium acetate (588 mg, 6.00 mmol), THF (12 mL) and Pd(dppf)<sub>2</sub>Cl<sub>2</sub>·DCM (81.7 mg, 0.100 mmol). The reaction mixture was heated to 65 °C and left stirring under the nitrogen atmosphere overnight, followed by TLC (9:1 hexane: EtOAc). The mixture was quenched by distilled water (20 mL). EtOAc (20 mL) was added and the organic layer was separated. The aqueous layer was extracted with EtOAc (3 × 20 mL), and the combined organic layers were dried (MgSO<sub>4</sub>) and filtered. Solvent was removed to give the crude product. The product was isolated via flash chromatography on silica eluted with 0-20% ethyl acetate in hexane to give 1-(2-(4,4,5,5-Tetramethyl-1,3,2-dioxaborolan-2-yl)phenyl)ethan-1-one **16** as a yellow solid (379 mg, 1.54 mmol, 77%). TLC: R<sub>f</sub> ca 0.50 (9:1 hexane: EtOAc), strong UV and KMnO<sub>4</sub>; δ<sub>H</sub> (400 MHz, CDCl<sub>3</sub>) 7.83 (1H, d, *J* = 7.7, ArH), 7.52 (2H, d, *J* = 7.7, ArH), 7.45-7.41 (1H, m, ArH), 2.60 (3H, s, CH<sub>3</sub>), 1.44 (12H, s, CH<sub>3</sub>) ppm; δ<sub>C</sub> (100 MHz, CDCl<sub>3</sub>) 199.84 (C), 140.53 (C), 132.49 (CH), 132.22 (CH), 128.88 (CH), 128.43 (CH), 83.72 (C), 25.48 (CH<sub>3</sub>), 24.90 (CH<sub>3</sub>) ppm. Data matched that reported.



$^1\text{H}$  NMR (400 MHz,  $\text{CDCl}_3$ )

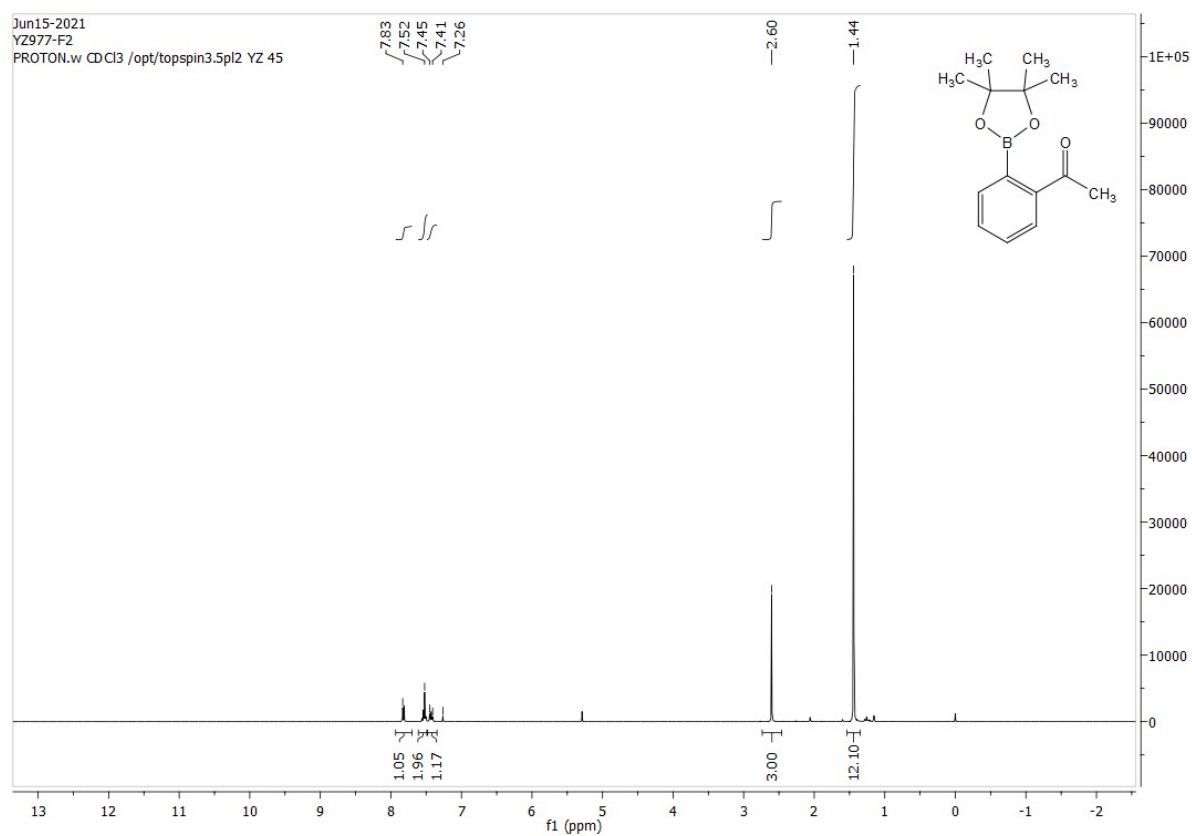

$^{13}\text{C}$  NMR (100 MHz,  $\text{CDCl}_3$ )

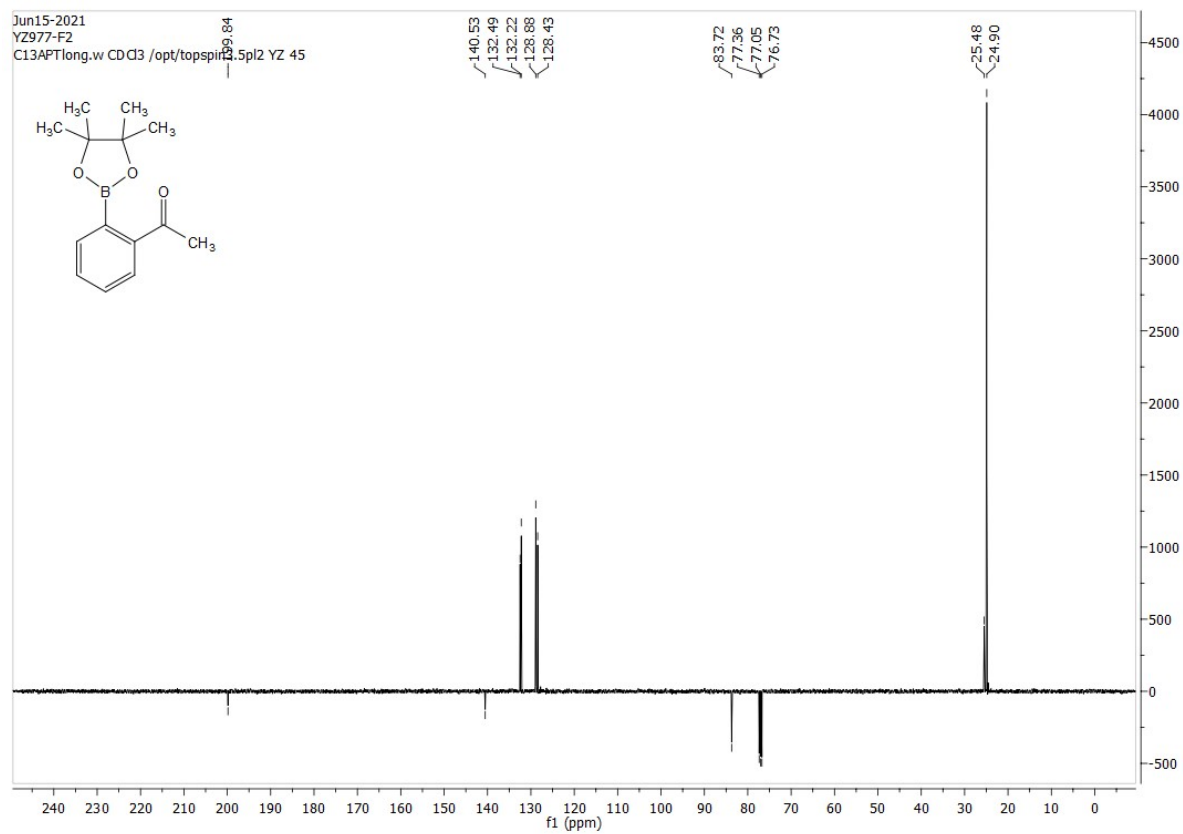

Racemic and (*S*)-3-methylbenzo[*c*][1,2]oxaborol-1(3*H*)-ol **17**.

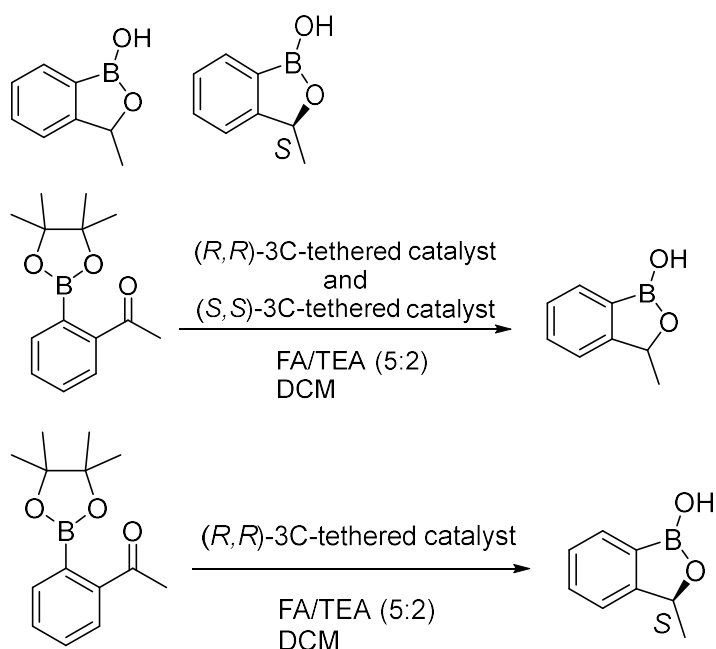

This compound has been reported and fully characterized: Supriya Rej and Naoto Chatani, *J. Am. Chem. Soc.* 2021, **43**, 2920-2929.

#### Synthesis of a racemic standard:

(*R,R*)-3C-Tethered Ru(II)-TsDPEN catalyst **2** (3.1 mg, 5.0  $\mu$ mol, 0.5 mol%) and (*S,S*)-3C-tethered Ru(II)-TsDPEN catalyst **2** (3.1 mg, 5.0  $\mu$ mol, 0.5 mol%) were added to FA: TEA (5:2 azeotropic mixture, 0.90 mL) at rt and the mixture was stirred under a nitrogen atmosphere for 15 minutes; after which a solution of 1-(2-(4,4,5,5-tetramethyl-1,3,2-dioxaborolan-2-yl)phenyl)ethan-1-one **16** (199 mg, 1.00 mmol) in DCM (1.24 mL) was added. The reaction mixture was stirred under a nitrogen atmosphere and followed by TLC (4:1 hexane: EtOAc). After 72 hours, the reaction was quenched using saturated NaHCO<sub>3</sub> solution (20 mL). EtOAc (20 mL) was added and the organic layer was separated. The aqueous layer was extracted with EtOAc (3 x 20 mL) and the combined organic layers were dried (MgSO<sub>4</sub>) and filtered. The solvent was removed to give the crude product. The product was isolated via flash chromatography on silica eluted with 0-50% EtOAc in hexane to give methyl 3-methylbenzo[*c*][1,2]oxaborol-1(3*H*)-ol **17** as a colorless oil (57.8 mg, 0.391 mmol, 39%). TLC: R<sub>f</sub> ca 0.20 (4:1 hexane: EtOAc), strong UV and KMnO<sub>4</sub>;  $\delta_{\text{H}}$  (400 MHz, CDCl<sub>3</sub>) 7.76 (1H, d, *J* = 7.3, ArH), 7.48 (1H, t, *J* = 7.7, ArH), 7.38-7.33 (1H, m, ArH), 7.30 (1H, d, *J* = 7.6, ArH), 6.75 (1H, s, OH), 5.39 (1H, q, *J* = 6.7, ArCH), 1.56 (1H, d, *J* = 6.7, CH<sub>3</sub>) ppm;  $\delta_{\text{C}}$  (100 MHz, CDCl<sub>3</sub>) 158.01 (C), 131.19 (CH), 130.66

(CH), 127.41 (CH), 120.95 (CH), 78.46 (CH), 22.38 (CH<sub>3</sub>) ppm. Data matched that reported.

ATH of 1-(2-(4,4,5,5-tetramethyl-1,3,2-dioxaborolan-2-yl)phenyl)ethan-1-one **16**: (*R,R*)-3C-tethered Ru(II)-TsDPEN catalyst **2** (5.6 mg, 9.0 μmol, 1 mol%) was added to FA: TEA (5:2 azeotropic mixture, 0.81 mL) at rt and the mixture was stirred under a nitrogen atmosphere for 15 minutes; after which a solution of 1-(2-(4,4,5,5-tetramethyl-1,3,2-dioxaborolan-2-yl)phenyl)ethan-1-one **16** (179 mg, 0.900 mmol) in DCM (1.12 mL) was added. The reaction mixture was stirred under a nitrogen atmosphere and followed by TLC (4:1 hexane: EtOAc). After 72 hours, the reaction was quenched using saturated NaHCO<sub>3</sub> solution (20 mL). EtOAc (20 mL) was added and the organic layer was separated. The aqueous layer was extracted with EtOAc (3 x 20 mL) and the combined organic layers were dried (MgSO<sub>4</sub>) and filtered. The solvent was removed to give the crude product. The product was isolated via flash chromatography on silica eluted with 0-50% EtOAc in hexane to give methyl 3-methylbenzo[c][1,2]oxaborol-1(3*H*)-ol **17** as a colorless oil (63.8 mg, 0.431 mmol, 48%). The reaction mixture could not be resolved by chiral HPLC: 100% conversion, 31% ee, *S* configuration; ee and configuration were confirmed by comparison with compound after reaction with bromopyridine.

$^1\text{H}$  NMR (400 MHz,  $\text{CDCl}_3$ )

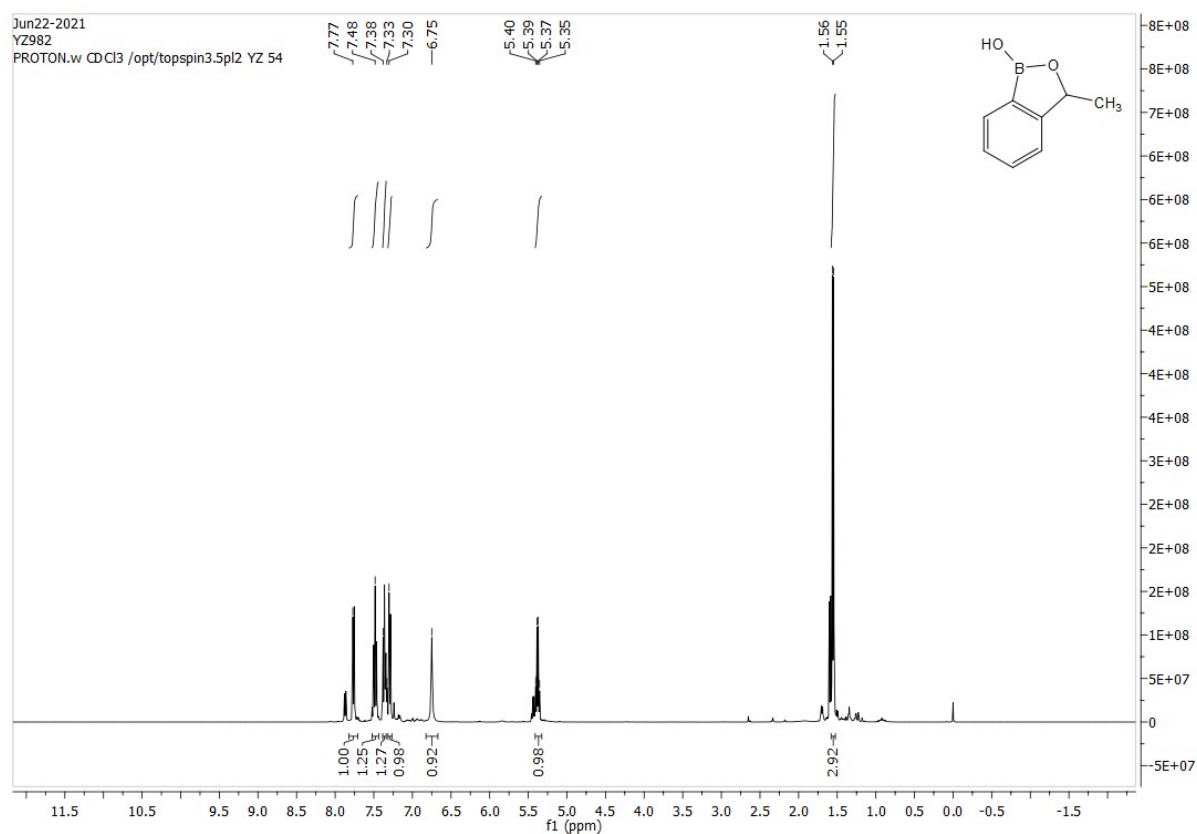

$^{13}\text{C}$  NMR (100 MHz,  $\text{CDCl}_3$ )

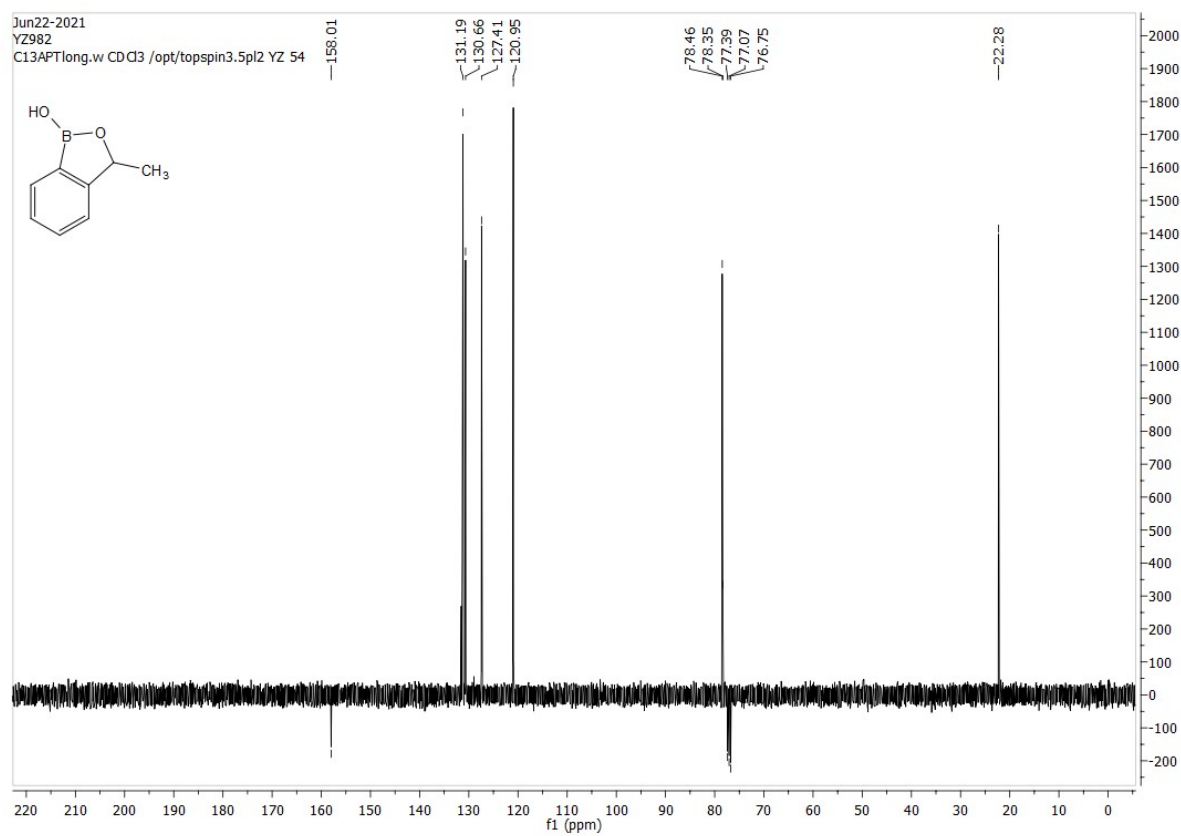

Racemic and (*S*)-1-(2-(Pyridin-2-yl)phenyl)ethan-1-ol **18**.

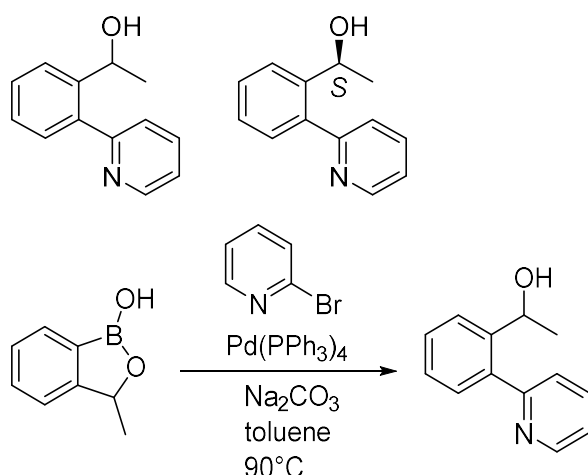

This compound has been reported and fully characterized: E. Liardo, N. Rios-Lombardia, F. Moris, J. Gonzalez-Sabin and F. Rebolledo, *Eur. J. Org. Chem.* 2018, **23**, 3031-3035.

Racemic.

To a solution of  $\text{Pd(PPh}_3)_4$  (70.5 mg, 0.0610 mmol) in toluene (7.3 mL) was added 2-bromopyridine (386 mg, 2.44 mmol), racemic 3-methylbenzo[*c*][1,2]oxaborol-1(3*H*)-ol **17** (180 mg, 1.22 mmol) and sodium carbonate (0.732 mL, 20% w/v). The reaction mixture was heated to 90 °C and left stirring under the nitrogen atmosphere overnight, followed by TLC (2:1 hexane: EtOAc). The mixture was quenched by distilled water (20 mL). EtOAc (20 mL) was added and the organic layer was separated. The aqueous layer was extracted with EtOAc (3 × 20 mL), and the combined organic layers were dried ( $\text{MgSO}_4$ ) and filtered. Solvent was removed to give the crude product. The product was isolated via flash chromatography on silica eluted with 20-100% ethyl acetate in hexane to give racemic 1-(2-(pyridin-2-yl)phenyl)ethan-1-ol **18** as a colorless oil (51.8 mg, 0.260 mmol, 21%). TLC:  $R_f$  ca 0.20 (2:1 hexane: EtOAc), strong UV and  $\text{KMnO}_4$ ;  $\delta_{\text{H}}$  (400 MHz,  $\text{CDCl}_3$ ) 8.63 (1H, d,  $J = 4.6$ , H in pyridine), 7.84 (1H, td,  $J = 7.8, 1.5$ , ArH), 7.60 (2H, dd,  $J = 15.3, 7.7$ , ArH), 7.46-7.30 (4H, m, ArH + H in pyridine), 6.40 (1H, s, OH), 4.76 (1H, q,  $J = 6.6$ , CH), 1.51 (3H, d,  $J = 6.6$ ,  $\text{CH}_3$ ) ppm;  $\delta_{\text{C}}$  (100 MHz,  $\text{CDCl}_3$ ) 159.88 (C), 147.89 (CH), 143.45 (C), 139.57 (C), 137.55 (CH), 130.64 (CH), 129.18 (CH), 127.58 (CH), 126.49 (CH), 124.27 (CH), 122.18 (CH), 66.77 (CH), 20.42 ( $\text{CH}_3$ ) ppm;  $m/z$  (ES-API+) 222.1 ( $\text{M}^+ + 23$ , 100%). Data matched that reported.

Enantiomeric excess and conversion determined by HPLC analysis (Chiralcel OD, 30 cm x 6mm column, hexane:iPrOH 90:10, 0.8 mL/min, T = 25°C) *S* isomer 11.8 min and *R* isomer 15.4 min. The same column and solvent combination was used in the literature reference above.

#### Asymmetric.

To a solution of Pd(PPh<sub>3</sub>)<sub>4</sub> (24.6 mg, 0.0213 mmol) in toluene (2.6 mL) was added 2-bromopyridine (135 mg, 0.852 mmol), asymmetric 3-methylbenzo[c][1,2]oxaborol-1(3*H*)-ol **17** (63.0 mg, 0.426 mmol) and sodium carbonate (0.256 mL, 20% w/v). The reaction mixture was heated to 90 °C and left stirring under the nitrogen atmosphere overnight, followed by TLC (2:1 hexane: EtOAc). The mixture was quenched by distilled water (20 mL). EtOAc (20 mL) was added and the organic layer was separated. The aqueous layer was extracted with EtOAc (3 × 20 mL), and the combined organic layers were dried (MgSO<sub>4</sub>) and filtered. Solvent was removed to give the crude product. The product was isolated via flash chromatography on silica eluted with 20-100% ethyl acetate in hexane to give (*S*)-1-(2-(pyridin-2-yl)phenyl)ethan-1-ol **18** as a colorless oil (23.2 mg, 0.117 mmol, 27%). The reaction was also followed by HPLC (Chiralcel OD, 30 cm x 6mm column, hexane:iPrOH 90:10, 0.8 mL/min, T = 25°C); [ $\alpha$ ]<sub>D</sub><sup>26</sup> -11.4 (c 0.460 in CHCl<sub>3</sub>) 31% ee (*S*) (lit. [ $\alpha$ ]<sub>D</sub><sup>26</sup> -14.3 (c 0.40 in CHCl<sub>3</sub>) >99% ee (*S*)) Reference: E. Liardo, N. Rios-Lombardia, F. Moris, J. Gonzalez-Sabin, F. Rebolledo; *Eur. J. Org. Chem.* 2018, **23**, 3031-3035.

$^1\text{H}$  NMR (400 MHz,  $\text{CDCl}_3$ )

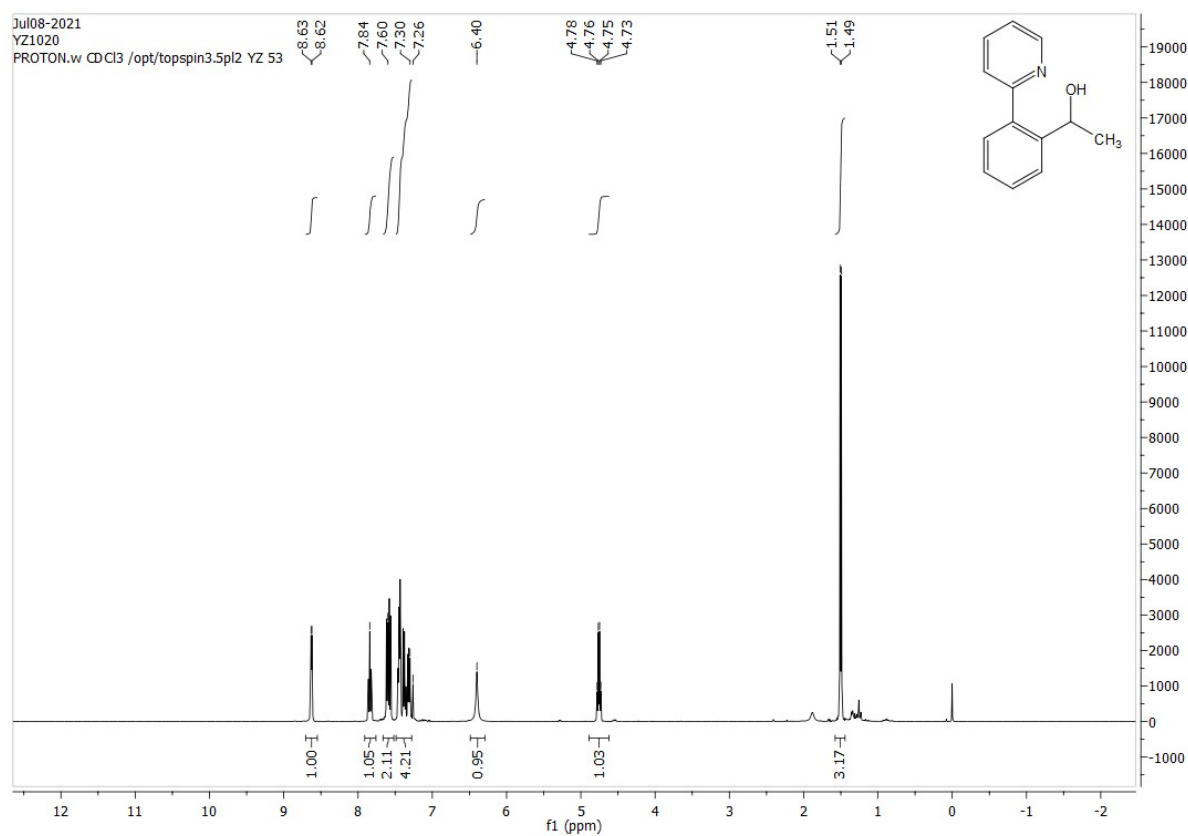

$^{13}\text{C}$  NMR (100 MHz,  $\text{CDCl}_3$ )

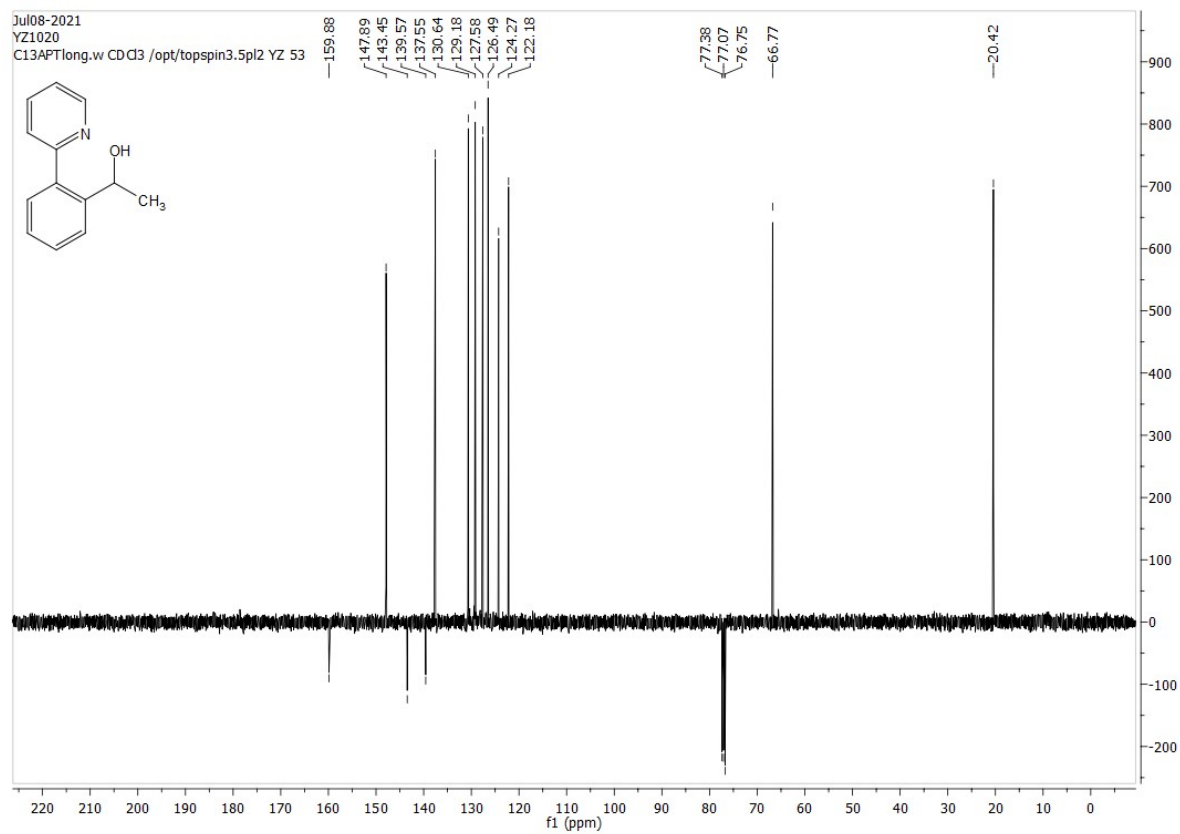

# HPLC of racemic 1-(2-(pyridin-2-yl)phenyl)ethan-1-ol **18**.

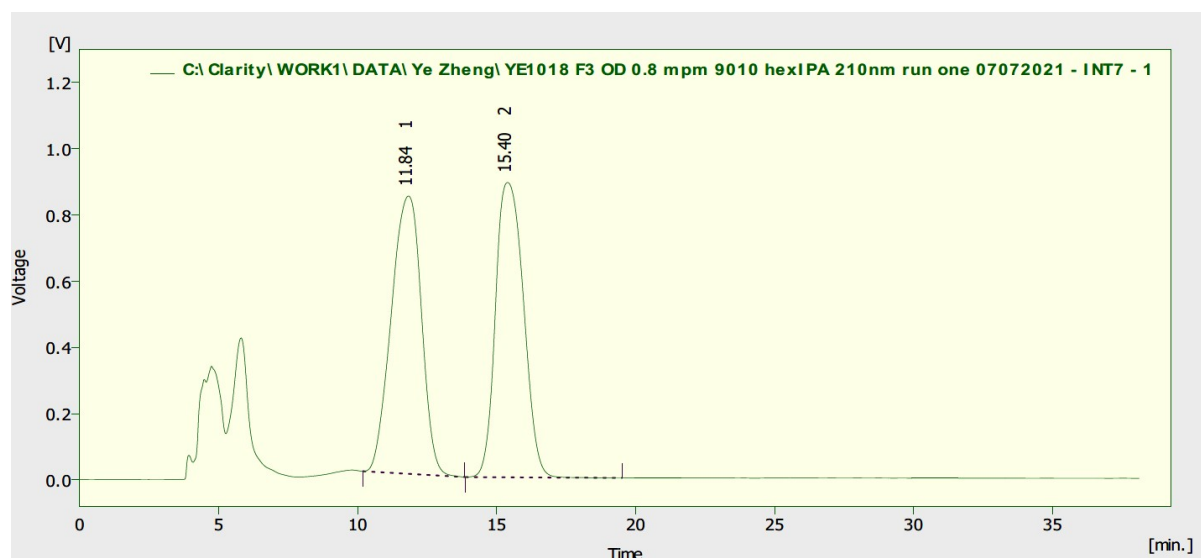

Result Table (Uncal - C:\Clarity\WORK1\DATA\Ye Zheng\YE1018 F3 OD 0.8 mpm 9010 hexIPA 210nm run one 07072021 - INT7 - 1)

|   | Reten. Time<br>[min] | Area<br>[mV.s] | Height<br>[mV] | Area<br>[%] | Height<br>[%] | W05<br>[min] | Compound<br>Name |
|---|----------------------|----------------|----------------|-------------|---------------|--------------|------------------|
| 1 | 11.837               | 63188.573      | 838.607        | 50.3        | 48.5          | 1.21         |                  |
| 2 | 15.397               | 62316.573      | 890.003        | 49.7        | 51.5          | 1.12         |                  |
|   | Total                | 125505.145     | 1728.610       | 100.0       | 100.0         |              |                  |

# HPLC of 1-(2-(pyridin-2-yl)phenyl)ethan-1-ol **18** (31% ee, *S* configuration).

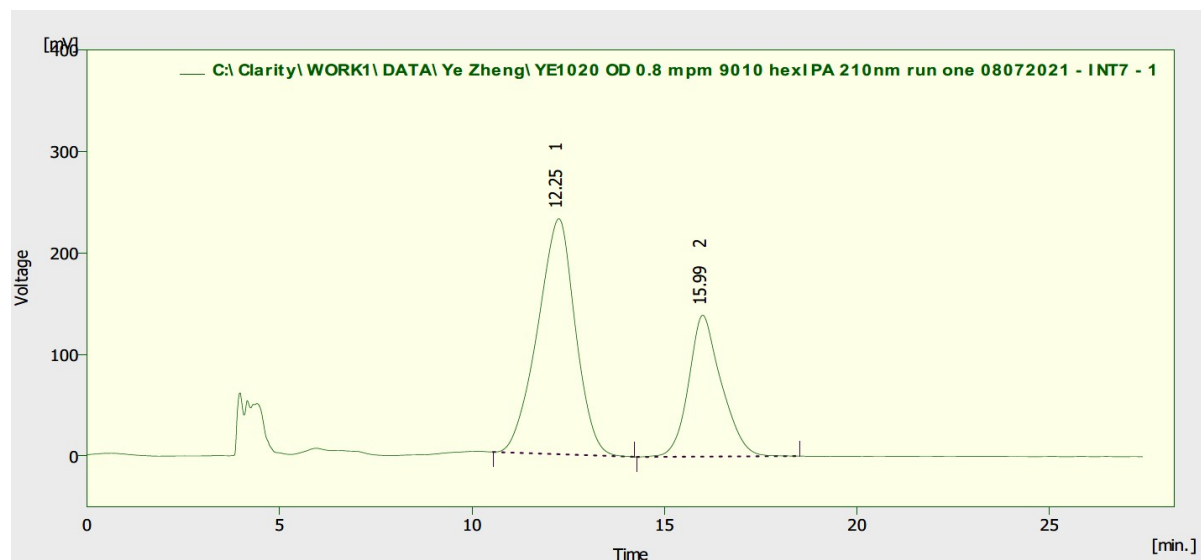

Result Table (Uncal - C:\Clarity\WORK1\DATA\Ye Zheng\YE1020 OD 0.8 mpm 9010 hexIPA 210nm run one 08072021 - INT7 - 1)

|   | Reten. Time<br>[min] | Area<br>[mV.s] | Height<br>[mV] | Area<br>[%] | Height<br>[%] | W05<br>[min] | Compound<br>Name |
|---|----------------------|----------------|----------------|-------------|---------------|--------------|------------------|
| 1 | 12.253               | 15807.306      | 231.898        | 65.7        | 62.5          | 1.05         |                  |
| 2 | 15.990               | 8245.177       | 139.198        | 34.3        | 37.5          | 0.89         |                  |
|   | Total                | 24052.483      | 371.095        | 100.0       | 100.0         |              |                  |



### Data related to Figure 5.

(4-Bromophenyl)(phenyl)methanol.

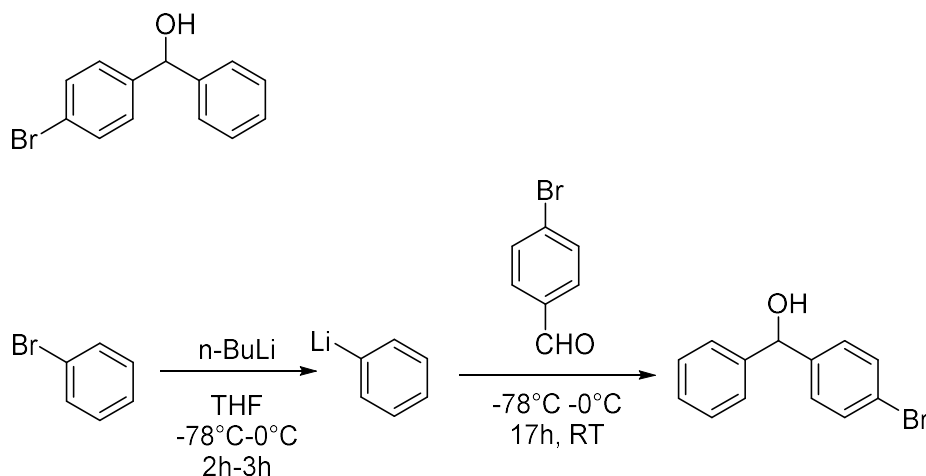

This compound has been reported and fully characterized: M. Das, D. F. O'Shea, *J. Org. Chem.* 2014, **79**, 5595-5607.

To a solution of bromobenzene (432 mg, 2.75 mmol) in THF (3.3 mL) at -78 °C was added dropwise a solution of *n*-butyllithium (1.00 mL, 2.5M in hexanes, 2.50 mmol). The reaction mixture was then stirred under a nitrogen atmosphere for 2-3 hours, after which 4-bromobenzaldehyde (463 mg, 2.50 mmol) was added dropwise. The reaction mixture was left stirring under the nitrogen atmosphere and allowed to warm to rt. The reaction was followed by TLC (9:1 hexane: EtOAc). The mixture was quenched by saturated NH<sub>4</sub>Cl solution (20 mL). EtOAc (20 mL) was added and the organic layer was separated. The aqueous layer was extracted with EtOAc (3 × 20 mL), and the combined organic layers were dried (MgSO<sub>4</sub>) and filtered. Solvent was removed to give the crude product. The product was isolated via flash chromatography on silica eluted with 0-20% EtOAc in hexane to give (4-bromophenyl)(phenyl)methanol as a yellow oil (456 mg, 1.74 mmol, 70%). TLC: R<sub>f</sub> ca 0.20 (9:1 hexane: EtOAc), strong UV and KMnO<sub>4</sub>; δ<sub>H</sub> (400 MHz, CDCl<sub>3</sub>) 7.44 (2H, d, *J* = 8.4, ArH), 7.33-7.21 (7H, m, ArH), 5.75 (1H, d, *J* = 3.4, ArCH), 2.37 (1H, d, *J* = 3.4, OH) ppm; δ<sub>C</sub> (100 MHz, CDCl<sub>3</sub>) 143.37 (C), 142.74 (C), 131.57 (CH), 128.69 (CH), 128.25 (CH), 127.91 (CH), 126.56 (CH), 121.44 (C), 75.67 (CH) ppm; *m/z* (ES-API<sup>+</sup>) 285.0 (M<sup>+</sup> + 23, 100%). Data matched that reported.

$^1\text{H}$  NMR (400 MHz,  $\text{CDCl}_3$ )

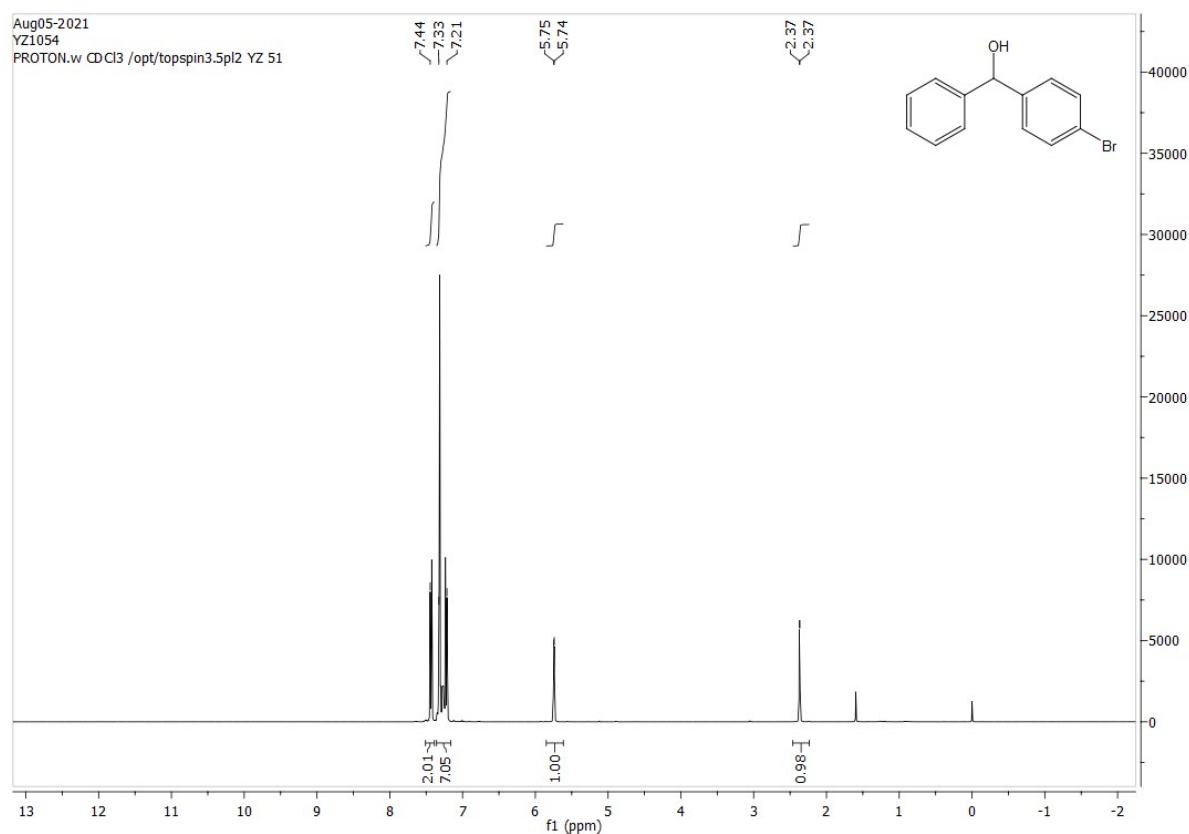

$^{13}\text{C}$  NMR (100 MHz,  $\text{CDCl}_3$ )

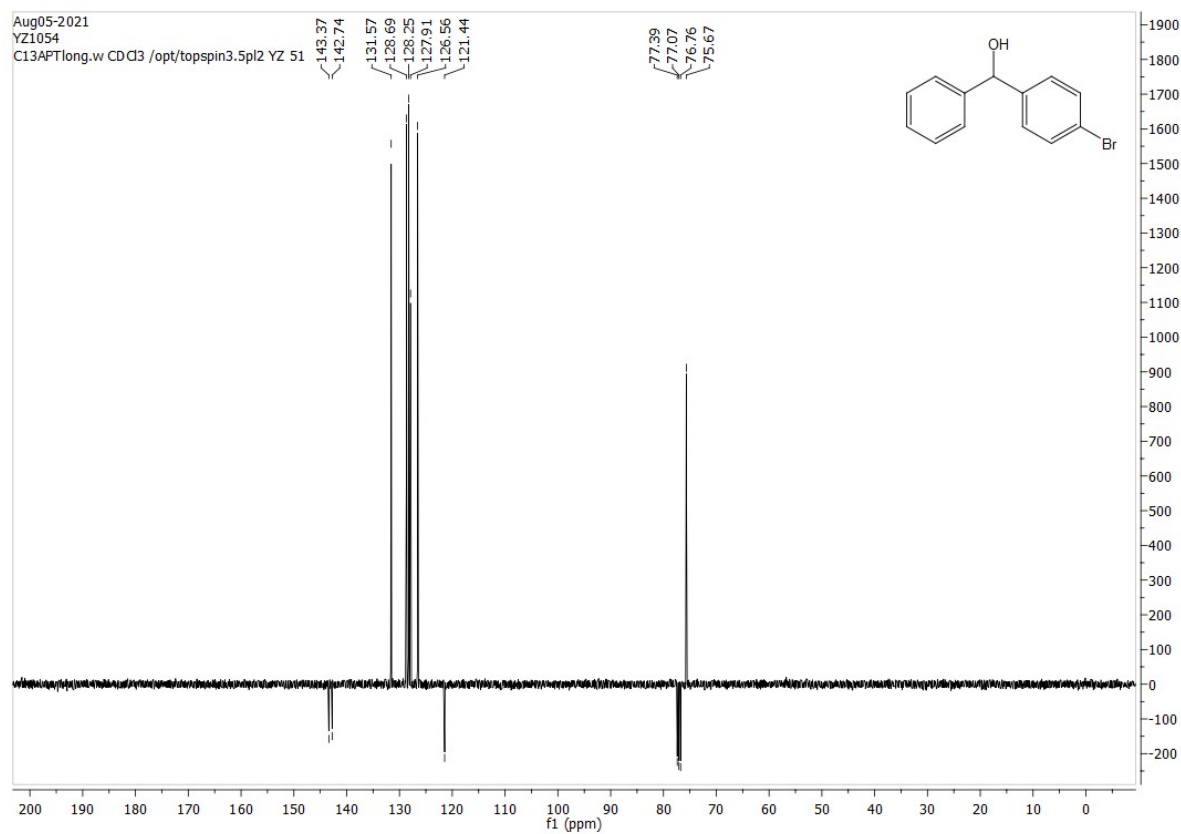

(4-Bromophenyl)(phenyl)methanone.

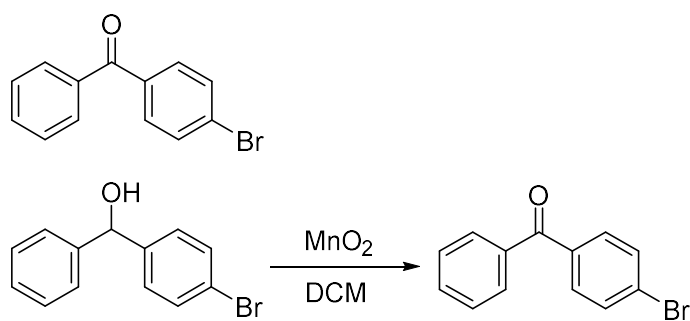

This compound has been reported and fully characterized: B. Skillinghaug, C. Skold, J. Rydfjord, F. Svensson, M. Behrends, J. Savmarker, P. J. R. Sjöberg, M. Larhed, *J. Org. Chem.* 2014, **79**, 12018-12032.

To a solution of (2-bromophenyl)(phenyl)methanol (450 mg, 1.72 mmol) in DCM (10 mL) at rt was added manganese dioxide (2.24 g, 25.8 mmol). The reaction mixture was left to stir under a nitrogen atmosphere overnight. TLC (9:1 hexane: EtOAc) after this time indicated full conversion. The solids were removed by gravity filtration and washed with DCM. The combined solvent was removed to give the product as a white solid (360 mg, 1.38 mmol, 81%). TLC: R<sub>f</sub> ca 0.40 (9:1 hexane: EtOAc), strong UV and KMnO<sub>4</sub>;  $\delta_{\text{H}}$  (400 MHz, CDCl<sub>3</sub>) 7.78-7.76 (2H, m, ArH), 7.69 (2H, d,  $J$  = 8.5, ArH), 7.64-7.58 (3H, m, ArH), 7.49 (2H, t,  $J$  = 7.6, ArH) ppm;  $\delta_{\text{C}}$  (100 MHz, CDCl<sub>3</sub>) 195.64 (C), 137.19 (C), 136.33 (C), 132.70 (CH), 131.63 (CH), 131.58 (CH), 129.96 (CH), 128.43 (CH), 127.53 (C) ppm;  $m/z$  (ES-API+) 283.0 ( $M^+$  + 23, 100%). Data matched that reported.

$^1\text{H}$  NMR (400 MHz,  $\text{CDCl}_3$ )

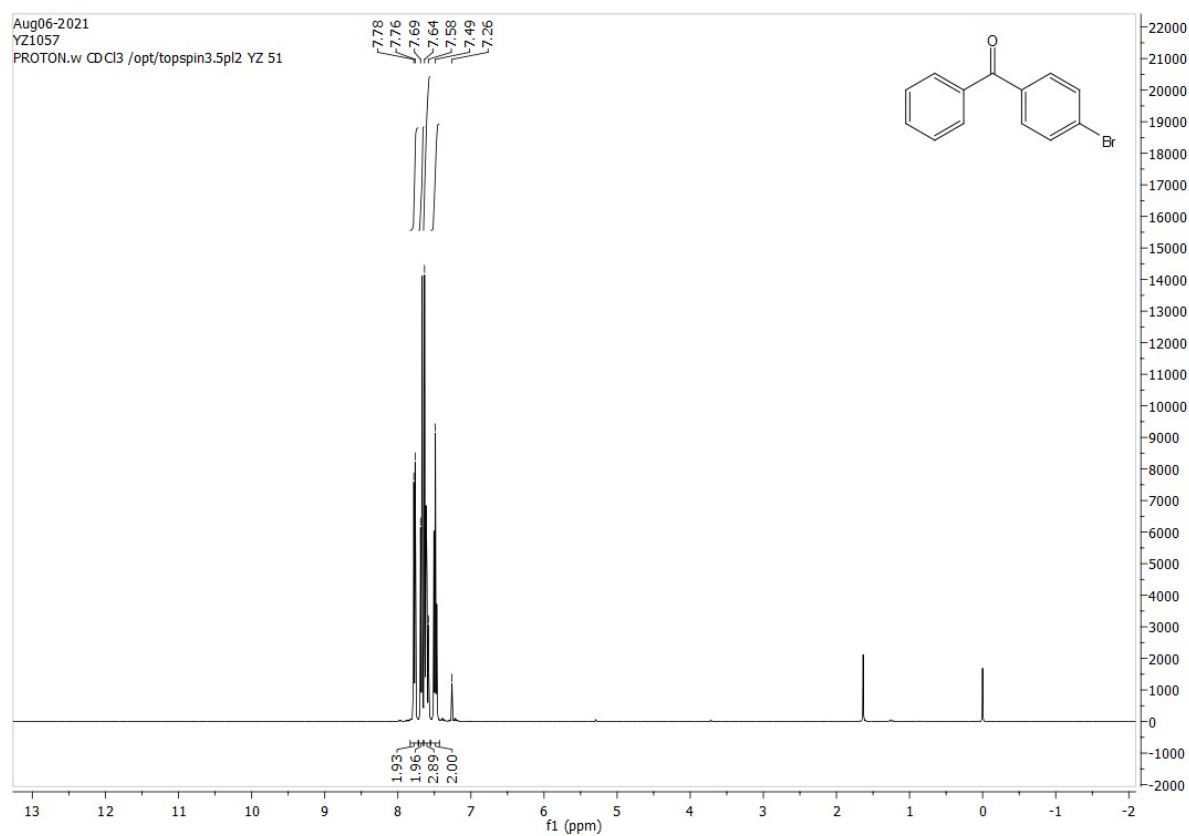

$^{13}\text{C}$  NMR (100 MHz,  $\text{CDCl}_3$ )

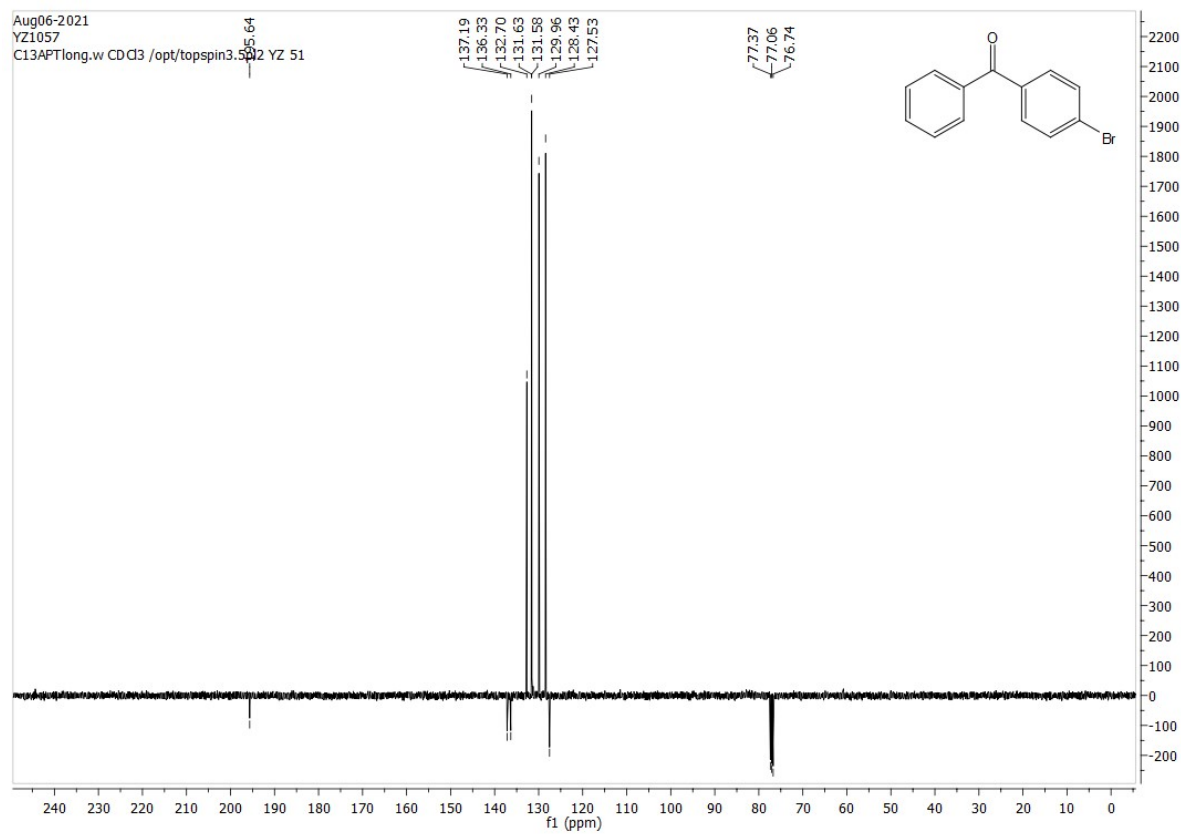

Phenyl(4-(4,4,5,5-tetramethyl-1,3,2-dioxaborolan-2-yl)phenyl)methanone.

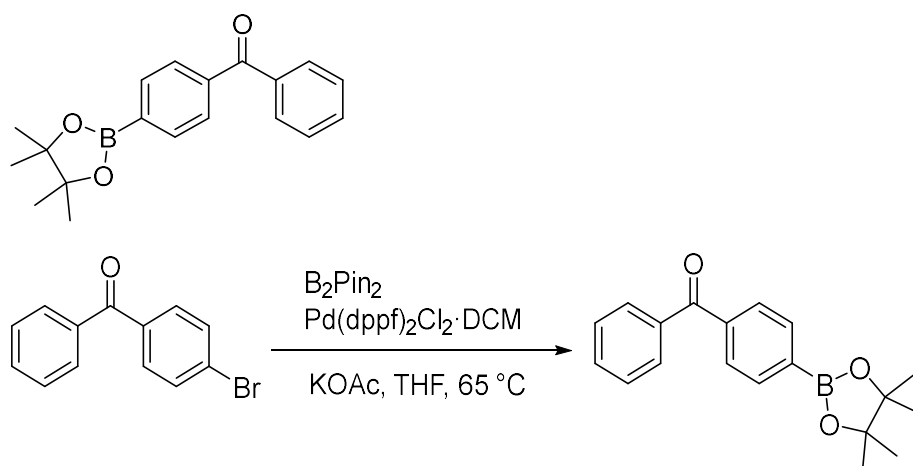

This compound has been reported and fully characterized: S. Barroso, M. Joksche, P. Puylaert, S. Tin, S. J. Bell, L. Donnellan, S. Duguid, C. Muir, P. Zhao, B. Farina, D. N. Tran, J. G. de Vries, *J. Org. Chem.* 2021, **86**, 103-109.

A round-bottom flask was charged with (4-bromophenyl)(phenyl)methanone (260 mg, 1.00 mmol), bis(pinacolato)diboron (305 mg, 1.20 mmol), potassium acetate (294 mg, 3.00 mmol), THF (5 mL) and  $Pd(dppf)_2Cl_2 \cdot DCM$  (40.9 mg, 0.0500 mmol). The reaction mixture was heated to 65 °C and left stirring under the nitrogen atmosphere for 2 days, followed by TLC (4:1 hexane: EtOAc). The mixture was quenched by distilled water (20 mL). EtOAc (20 mL) was added and the organic layer was separated. The aqueous layer was extracted with EtOAc (3 × 20 mL), and the combined organic layers were dried ( $MgSO_4$ ) and filtered. Solvent was removed to give the crude product. The product was isolated via flash chromatography on silica eluted with 0-20% ethyl acetate in hexane to give phenyl(4-(4,4,5,5-tetramethyl-1,3,2-dioxaborolan-2-yl)phenyl)methanone as a white solid (110 mg, 0.357 mmol, 36%).

TLC:  $R_f$  ca 0.50 (4:1 hexane: EtOAc), strong UV and  $KMnO_4$ ;  $\delta_H$  (500 MHz,  $CDCl_3$ ) 7.93 (2H, d,  $J = 8.0$ , ArH), 7.80-7.76 (4H, m, ArH), 7.59 (1H, t,  $J = 7.5$ , ArH), 7.47 (2H, t,  $J = 7.5$ , ArH), 1.37 (12H, s,  $CH_3$ ) ppm;  $\delta_C$  (125 MHz,  $CDCl_3$ ) 196.92 (C), 139.79 (C), 137.52 (C), 134.58 (CH), 132.54 (CH), 130.12 (CH), 129.02 (CH), 128.31 (CH), 84.22 (C), 24.91 ( $CH_3$ ) ppm;  $m/z$  (ES-API+) 331.1 ( $M^+ + 23$ , 100%).

Data matched that reported.

Enantiomeric excess and conversion determined by HPLC analysis (Chiralcel OJ, 30 cm x 6mm column, hexane:iPrOH 90:10, 1.0 mL/min,  $T = 25^\circ C$ ) ketone 5.5 min, *R* and *S* isomers 11.8 min and 18.8 min.

$^1\text{H}$  NMR (400 MHz,  $\text{CDCl}_3$ )

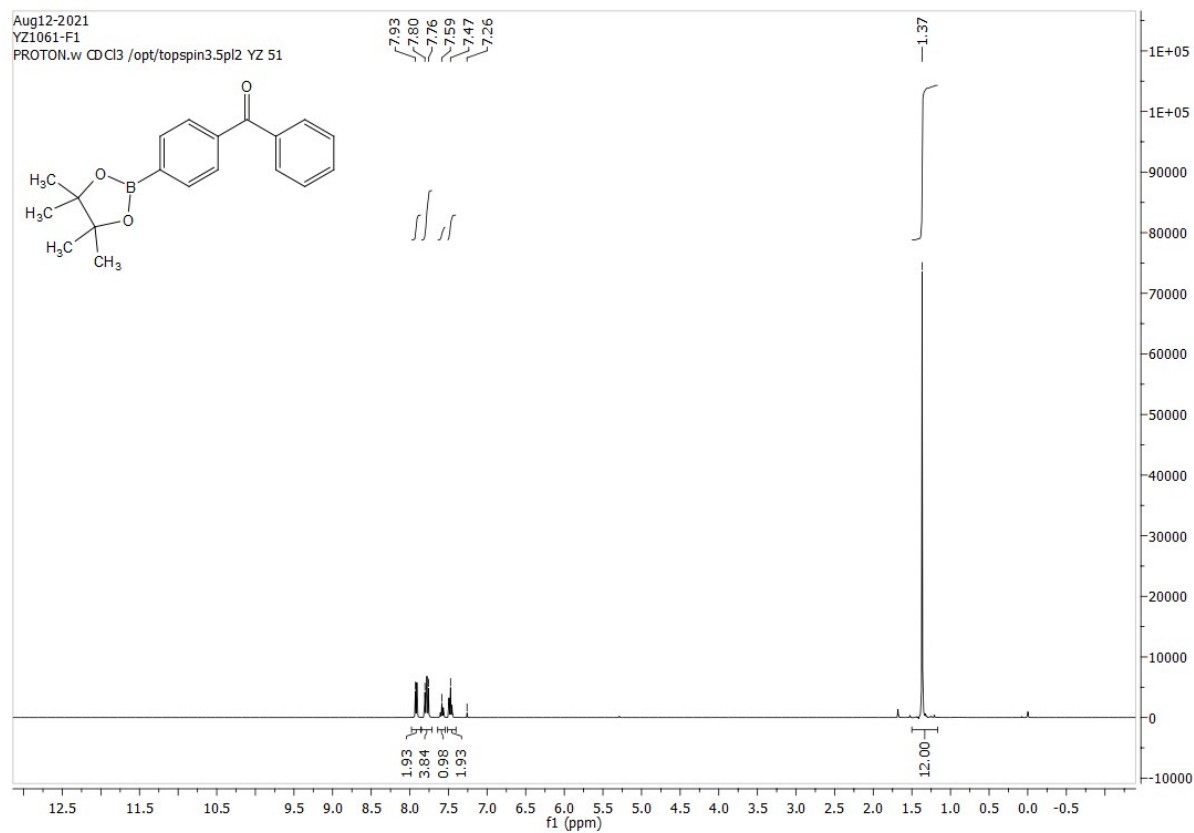

$^{13}\text{C}$  NMR (100 MHz,  $\text{CDCl}_3$ )

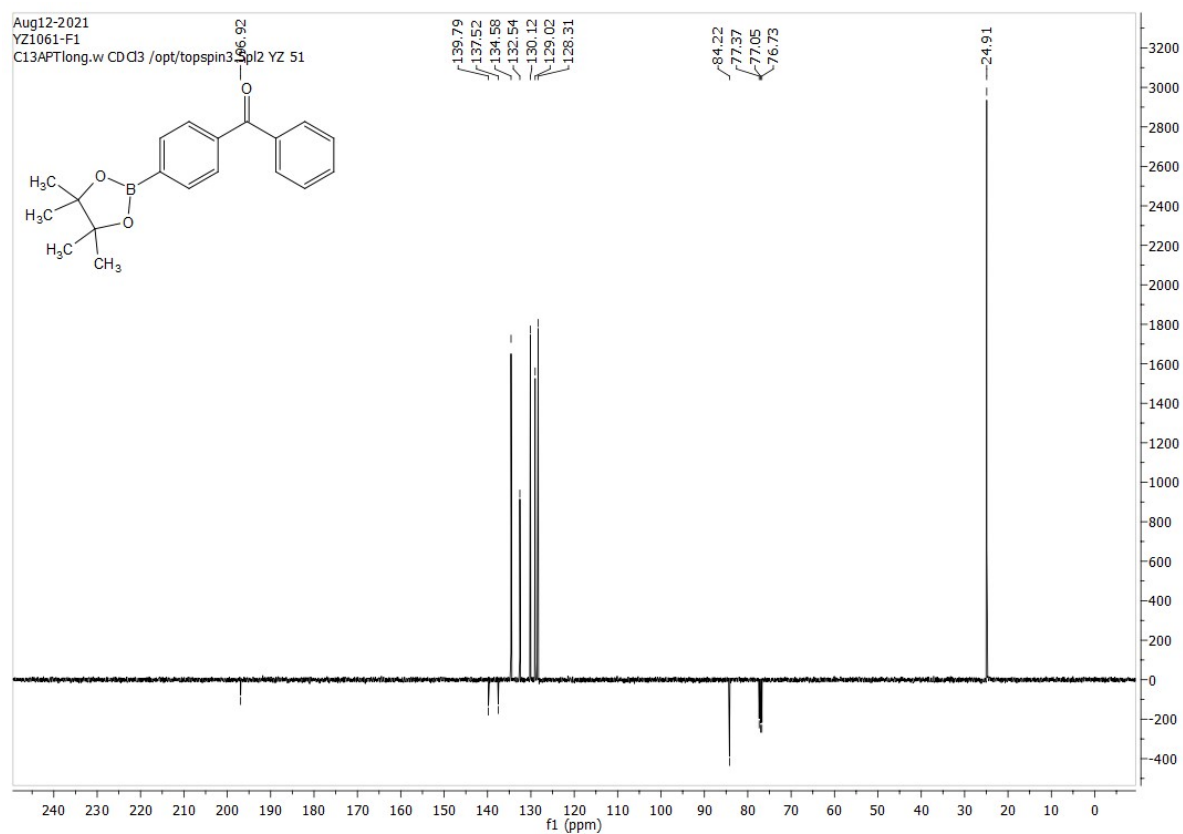

# HPLC of phenyl(4-(4,4,5,5-tetramethyl-1,3,2-dioxaborolan-2-yl)phenyl)methanone

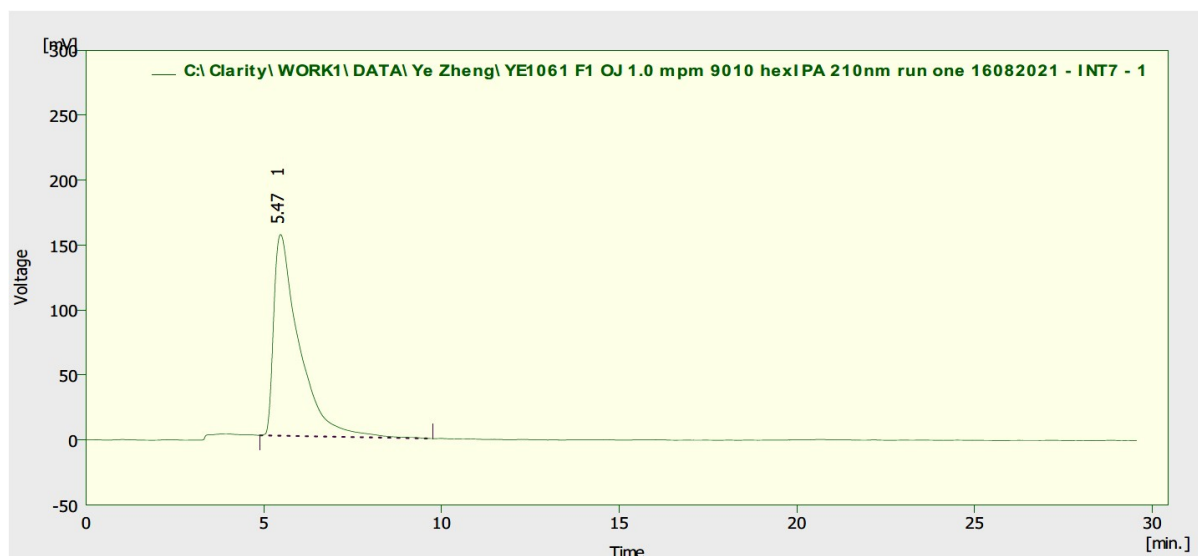

Result Table (Uncal - C:\Clarity\WORK1\DATA\Ye Zheng\YE1061 F1 OJ 1.0 mpm 9010 hexIPA 210nm run one 16082021 - INT7 - 1)

|   | Reten. Time<br>[min] | Area<br>[mV.s] | Height<br>[mV] | Area<br>[%] | Height<br>[%] | W05<br>[min] | Compound<br>Name |
|---|----------------------|----------------|----------------|-------------|---------------|--------------|------------------|
| 1 | 5.470                | 7721.544       | 154.977        | 100.0       | 100.0         | 0.69         |                  |
|   | Total                | 7721.544       | 154.977        | 100.0       | 100.0         |              |                  |

Phenyl(4-(4,4,5,5-tetramethyl-1,3,2-dioxaborolan-2-yl)phenyl)methanol **22**.

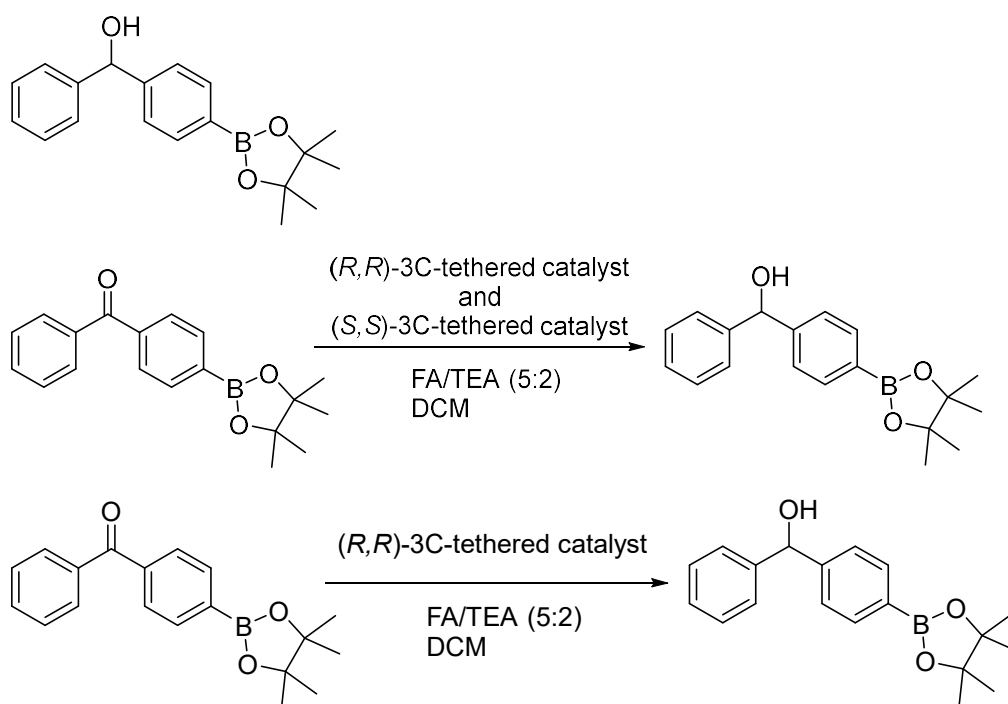

This compound has been reported and fully characterized: Y. Ashikari, T. Kawaguchi, K. Mandai, Y. Aizawa, A. Nagaki, *J. Am. Chem. Soc.* 2020, **142**, 17039-17047.

#### Synthesis of a racemic standard:

(*R,R*)-3C-Tethered Ru(II)-TsDPEN catalyst **2** (0.40 mg, 0.65  $\mu$ mol, 0.5 mol%) and (*S,S*)-3C-tethered Ru(II)-TsDPEN catalyst **2** (0.40 mg, 0.65  $\mu$ mol, 0.5 mol%) were added to FA: TEA (5:2 azeotropic mixture, 0.18 mL) at rt and the mixture was stirred under a nitrogen atmosphere for 15 minutes; after which a solution of phenyl(4-(4,4,5,5-tetramethyl-1,3,2-dioxaborolan-2-yl)phenyl)methanone (40.0 mg, 0.130 mmol) in DCM (0.25 mL) was added. The reaction mixture was stirred under a nitrogen atmosphere and followed by TLC (9:1 hexane: EtOAc). After 72 hours, the reaction was quenched using saturated NaHCO<sub>3</sub> solution (20 mL). EtOAc (20 mL) was added and the organic layer was separated. The aqueous layer was extracted with EtOAc (3 x 20 mL) and the combined organic layers were dried (MgSO<sub>4</sub>) and filtered. The solvent was removed to give the crude product. The product was isolated via flash chromatography on silica eluted with 0-50% EtOAc in hexane to give phenyl(4-(4,4,5,5-tetramethyl-1,3,2-dioxaborolan-2-yl)phenyl)methanol **22** as a colorless oil (17.7 mg, 0.0571 mmol, 54%). TLC: R<sub>f</sub> ca 0.20 (9:1 hexane: EtOAc), strong UV and KMnO<sub>4</sub>;  $\delta_{\text{H}}$  (500 MHz, CDCl<sub>3</sub>) 7.79 (2H, d, *J* = 8.0, ArH), 7.40-7.23 (7H, m, ArH), 5.84 (1H, s, ArCH), 2.31 (1H, s, OH), 1.32 (12H, s, CH<sub>3</sub>) ppm;  $\delta_{\text{C}}$  (125 MHz, CDCl<sub>3</sub>)



146.83 (C), 143.68 (C), 135.02 (CH), 128.54 (CH), 127.66 (CH), 126.64 (CH), 125.78 (CH), 83.81 (C), 76.28 (CH), 24.86 (CH<sub>3</sub>) ppm; m/z (ES-API+) 333.2 (M<sup>+</sup> + 23, 100%). Data matched that reported.

Enantiomeric excess and conversion determined by HPLC analysis (Chiralcel OJ, 30 cm x 6mm column, hexane:iPrOH 90:10, 1.0 mL/min, T = 25°C) ketone 5.5 min, *R* and *S* isomers 11.8 min and 18.8 min, configuration is not confirmed.

ATH of phenyl(4-(4,4,5,5-tetramethyl-1,3,2-dioxaborolan-2-yl)phenyl)methanone): (*R,R*)-3C-tethered Ru(II)-TsDPEN catalyst **2** (0.806 mg, 0.130 μmol, 1 mol%) was added to FA: TEA (5:2 azeotropic mixture, 0.18 mL) at rt and the mixture was stirred under a nitrogen atmosphere for 15 minutes; after which a solution of phenyl(4-(4,4,5,5-tetramethyl-1,3,2-dioxaborolan-2-yl)phenyl)methanone (40.0 mg, 0.130 mmol) in DCM (0.25 mL) was added. The reaction mixture was stirred under a nitrogen atmosphere and followed by TLC (9:1 hexane: EtOAc). After 72 hours, the reaction was quenched using saturated NaHCO<sub>3</sub> solution (20 mL). EtOAc (20 mL) was added and the organic layer was separated. The aqueous layer was extracted with EtOAc (3 x 20 mL) and the combined organic layers were dried (MgSO<sub>4</sub>) and filtered. The solvent was removed to give the crude product. The product was isolated via flash chromatography on silica eluted with 0-50% EtOAc in hexane to give phenyl(4-(4,4,5,5-tetramethyl-1,3,2-dioxaborolan-2-yl)phenyl)methanol **22** as a colorless oil (12.4 mg, 0.0400 mmol, 31%). The reaction was also followed by HPLC (Chiralcel OJ, 30 cm x 6mm column, hexane:iPrOH 90:10, 1.0 mL/min, T = 25°C): 8% ee.

<sup>1</sup>H NMR (500 MHz, CDCl<sub>3</sub>)

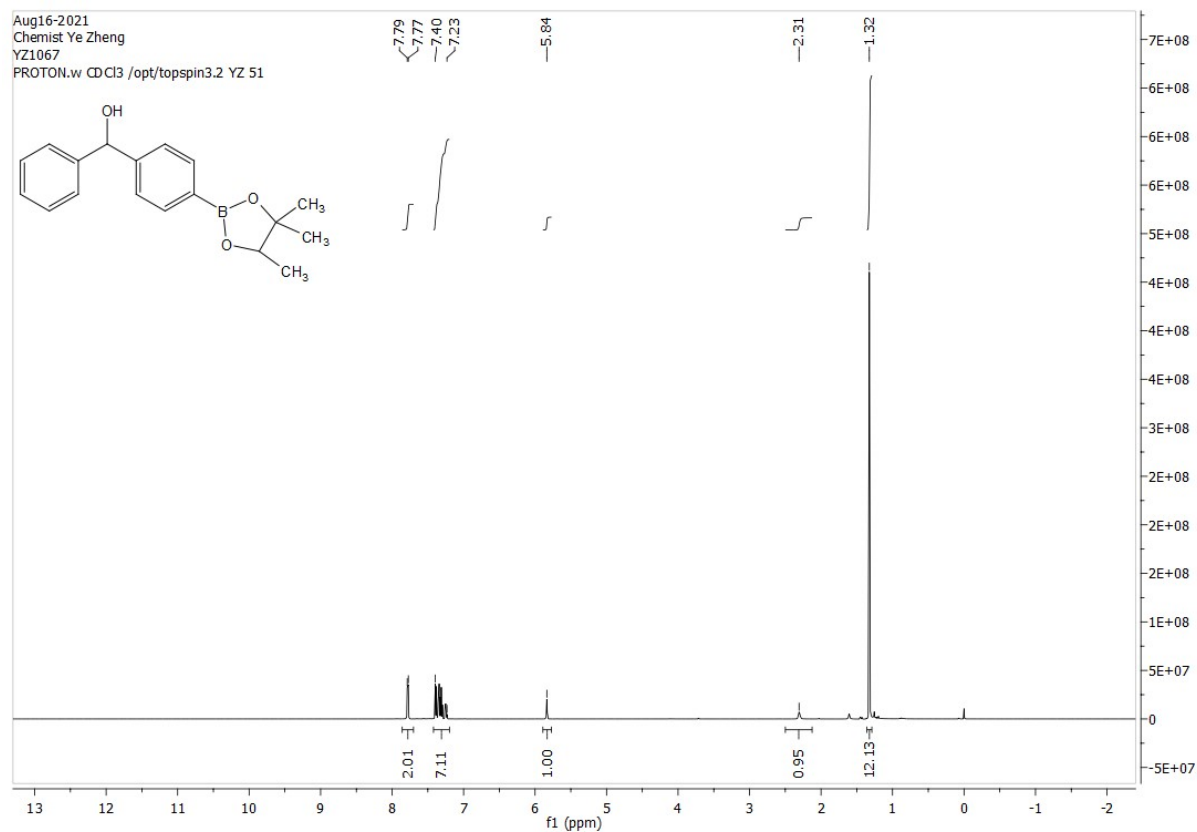

<sup>13</sup>C NMR (125 MHz, CDCl<sub>3</sub>)

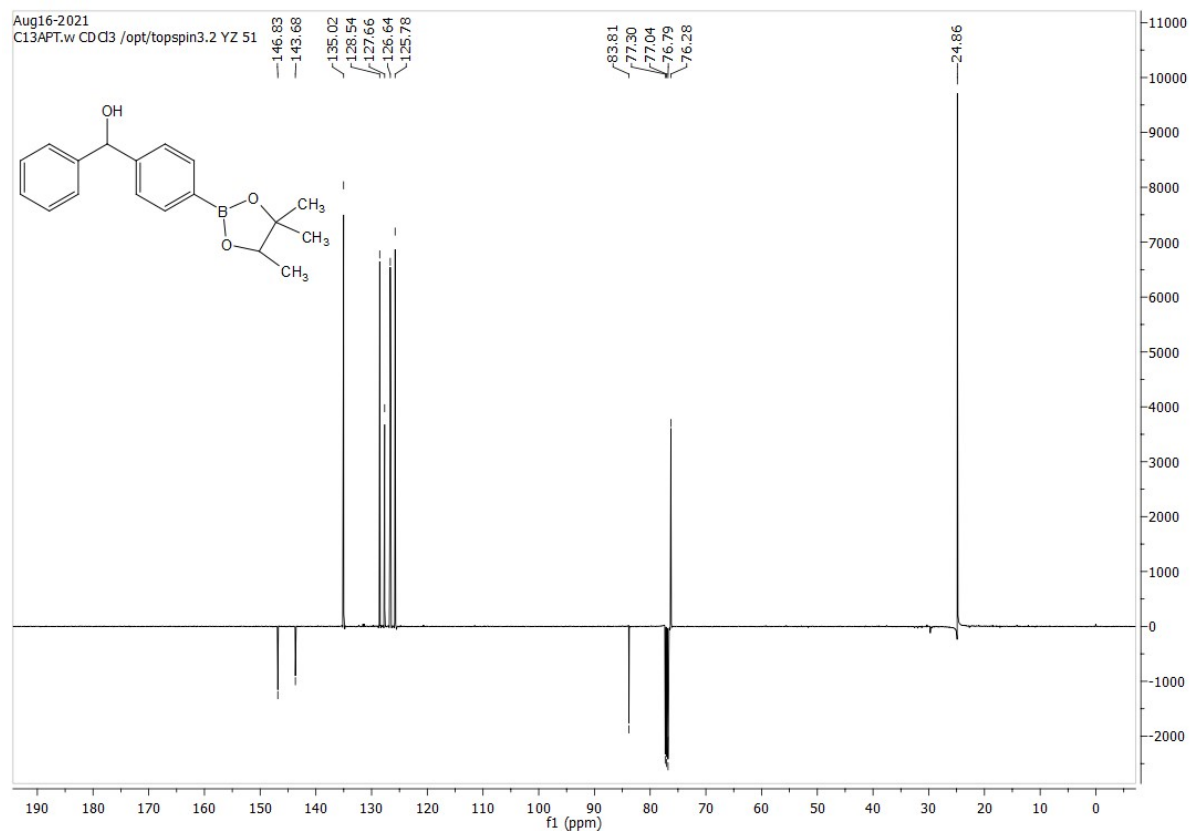

HPLC of racemic phenyl(4-(4,4,5,5-tetramethyl-1,3,2-dioxaborolan-2-yl)phenyl)methanol **22**

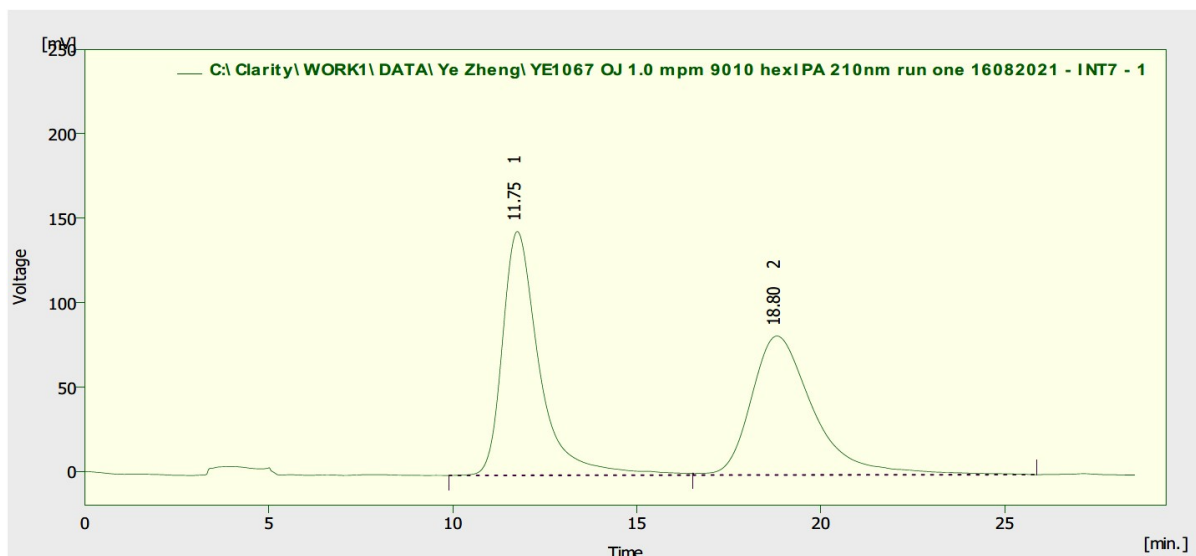

Result Table (Uncal - C:\Clarity\WORK1\DATA\Ye Zheng\YE1067 OJ 1.0 mpm 9010 hexIPA 210nm run one 16082021 - INT7 - 1)

|   | Reten. Time [min] | Area [mV.s] | Height [mV] | Area [%] | Height [%] | W05 [min] | Compound Name |
|---|-------------------|-------------|-------------|----------|------------|-----------|---------------|
| 1 | 11.753            | 10119.368   | 144.496     | 51.1     | 63.7       | 0.98      |               |
| 2 | 18.803            | 9687.162    | 82.356      | 48.9     | 36.3       | 1.70      |               |
|   | Total             | 19806.530   | 226.852     | 100.0    | 100.0      |           |               |

HPLC after ATH of phenyl(4-(4,4,5,5-tetramethyl-1,3,2-dioxaborolan-2-yl)phenyl)methanone using (*R,R*)-3C-Tethered Ru(II)-TsDPEN catalyst **2** (after 72 hours, 100% conversion, 8% ee)

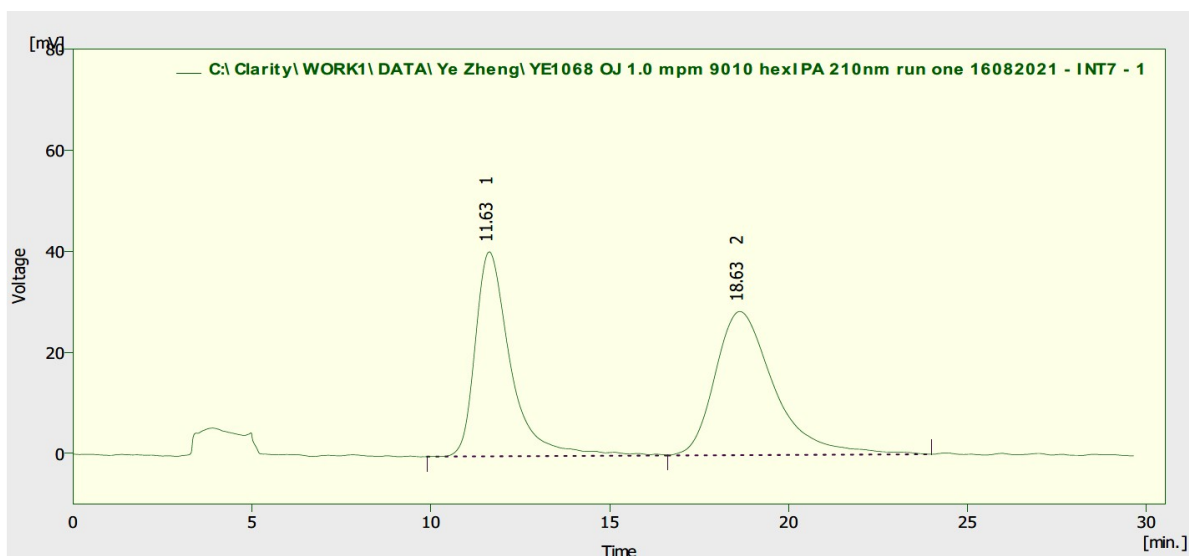

Result Table (Uncal - C:\Clarity\WORK1\DATA\Ye Zheng\YE1068 OJ 1.0 mpm 9010 hexIPA 210nm run one 16082021 - INT7 - 1)

|   | Reten. Time [min] | Area [mV.s] | Height [mV] | Area [%] | Height [%] | W05 [min] | Compound Name |
|---|-------------------|-------------|-------------|----------|------------|-----------|---------------|
| 1 | 11.630            | 2790.133    | 40.447      | 46.1     | 58.7       | 0.97      |               |
| 2 | 18.633            | 3268.610    | 28.428      | 53.9     | 41.3       | 1.67      |               |
|   | Total             | 6058.743    | 68.875      | 100.0    | 100.0      |           |               |

(4-Bromophenyl)(2-methoxyphenyl)methanol.

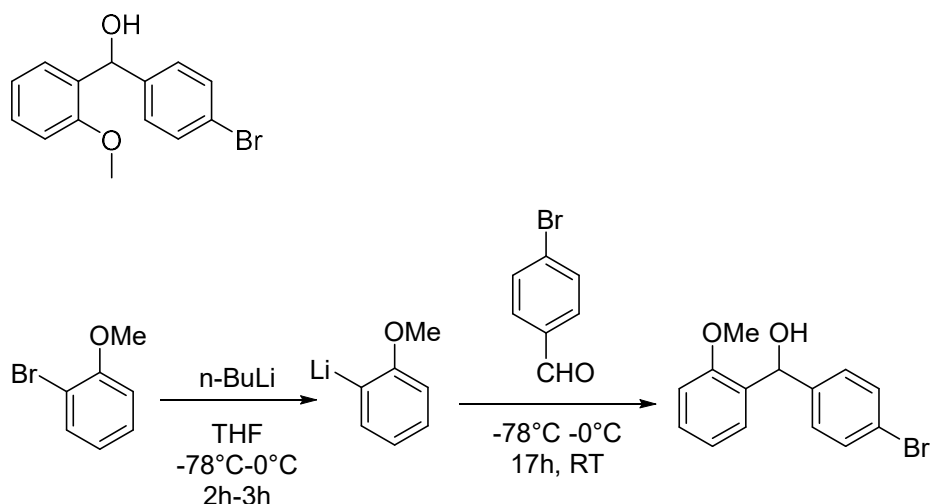

This compound is novel.

To a solution of 2-bromoanisole (514 mg, 2.75 mmol) in THF (3.3 mL) at -78 °C was added dropwise a solution of n-butyllithium (1.00 mL, 2.5M in hexanes, 2.50 mmol). The reaction mixture was then stirred under a nitrogen atmosphere for 2-3 hours, after which 4-bromobenzaldehyde (463 mg, 2.50 mmol) was added dropwise. The reaction mixture was left stirring under the nitrogen atmosphere and allowed to warm to rt. The reaction was followed by TLC (9:1 hexane: EtOAc). The mixture was quenched by saturated NH<sub>4</sub>Cl solution (20 mL). EtOAc (20 mL) was added and the organic layer was separated. The aqueous layer was extracted with EtOAc (3 × 20 mL), and the combined organic layers were dried (MgSO<sub>4</sub>) and filtered. Solvent was removed to give the crude product. The product was isolated via flash chromatography on silica eluted with 0-20% EtOAc in hexane to give (4-bromophenyl)(2-methoxyphenyl)methanol as a white solid (564 mg, 1.93 mmol, 77%). TLC: R<sub>f</sub> ca 0.20 (9:1 hexane: EtOAc), strong UV and KMnO<sub>4</sub>; Mp: 75°C; HRMS: (found (ESI<sup>+</sup>): [M+H]<sup>+</sup>, Calcd for C<sub>14</sub>H<sub>13</sub><sup>79</sup>BrNaO<sub>2</sub> 314.9983; Found 314.9991; 2.7 ppm error); ν<sub>max</sub> 3212 (br), 2998, 2938, 1587, 1485, 1462, 1437, 1279, 1240, 1184, 1046, 1029, 807, 751 cm<sup>-1</sup>; δ<sub>H</sub> (500 MHz, CDCl<sub>3</sub>) 7.44 (2H, d, *J* = 8.5, ArH), 7.26 (3H, ddd, *J* = 6.9, 6.3, 2.1, ArH), 7.21 (1H, dd, *J* = 7.5, ArH), 6.94 (1H, t, *J* = 7.5, ArH), 6.89 (1H, d, *J* = 8.2, ArH), 5.99 (1H, d, *J* = 5.6, ArCH), 3.80 (3H, s, OCH<sub>3</sub>), 3.05 (1H, d, *J* = 5.6, OH) ppm; δ<sub>C</sub> (125 MHz, CDCl<sub>3</sub>) 156.64 (C), 142.39 (C), 131.45 (C), 131.24 (CH), 129.01 (CH), 128.30 (CH), 127.75 (CH), 121.00 (C), 120.91 (CH), 110.82 (CH), 72.78 (CH), 55.42 (CH<sub>3</sub>) ppm; m/z (ES-API<sup>+</sup>) 315.0 (M<sup>+</sup> + 23, 100%).

$^1\text{H}$  NMR (500 MHz,  $\text{CDCl}_3$ )

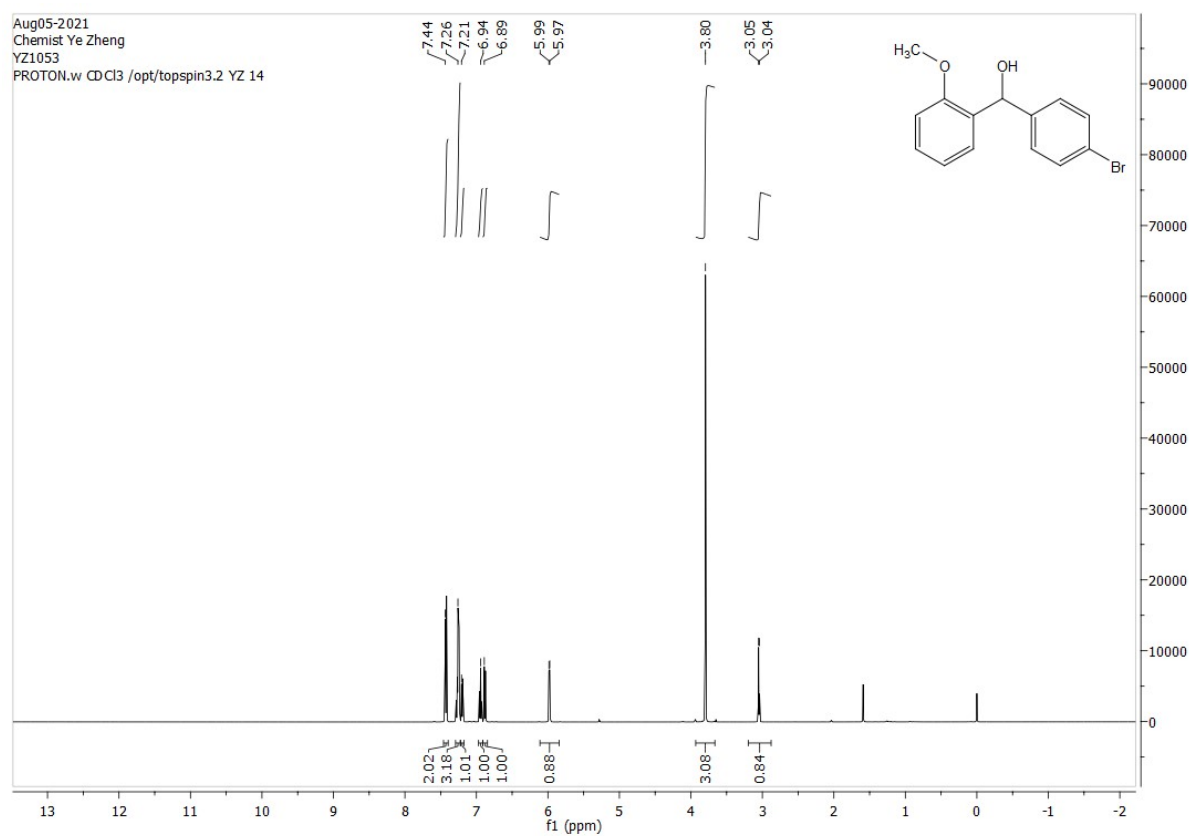

$^{13}\text{C}$  NMR (125 MHz,  $\text{CDCl}_3$ )

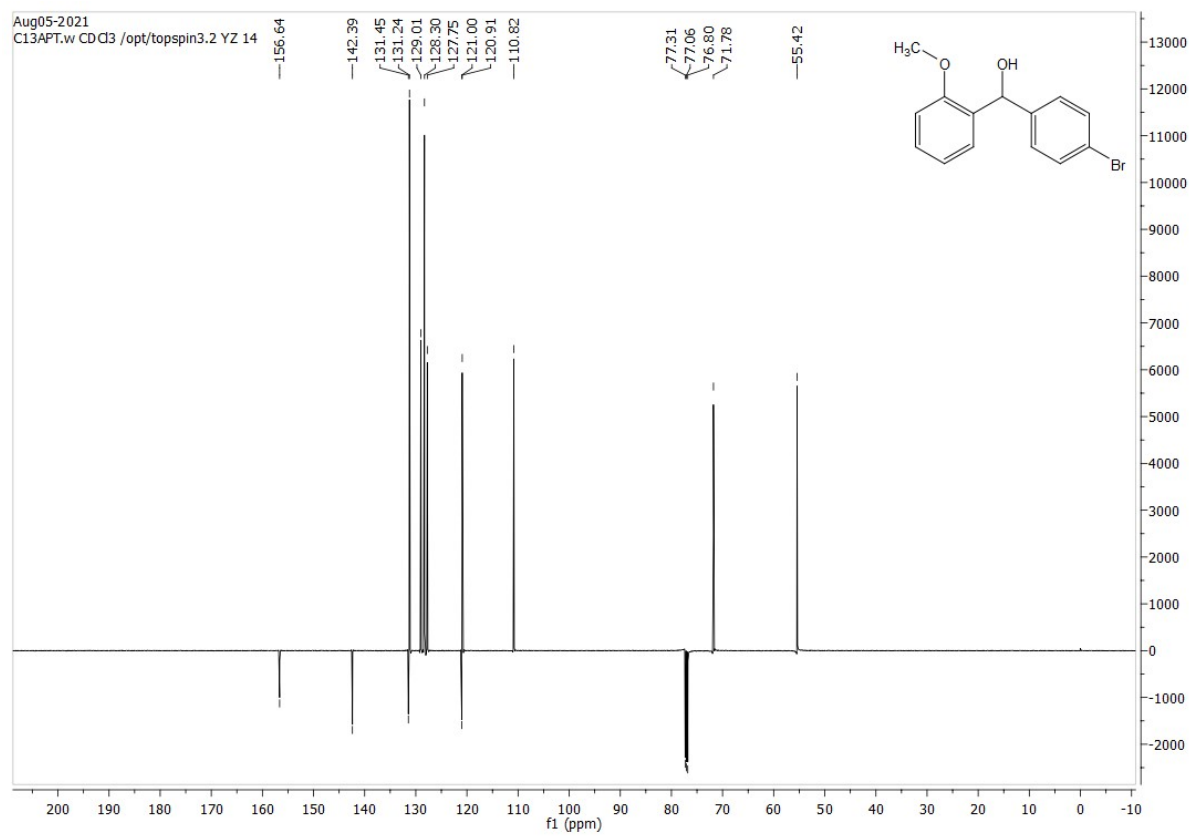

## COSY (500 MHz, CDCl<sub>3</sub>)

Chemist Ye Zheng  
YZ1053  
COSY.w CDCl<sub>3</sub> /opt/topspin3.2 YZ 14

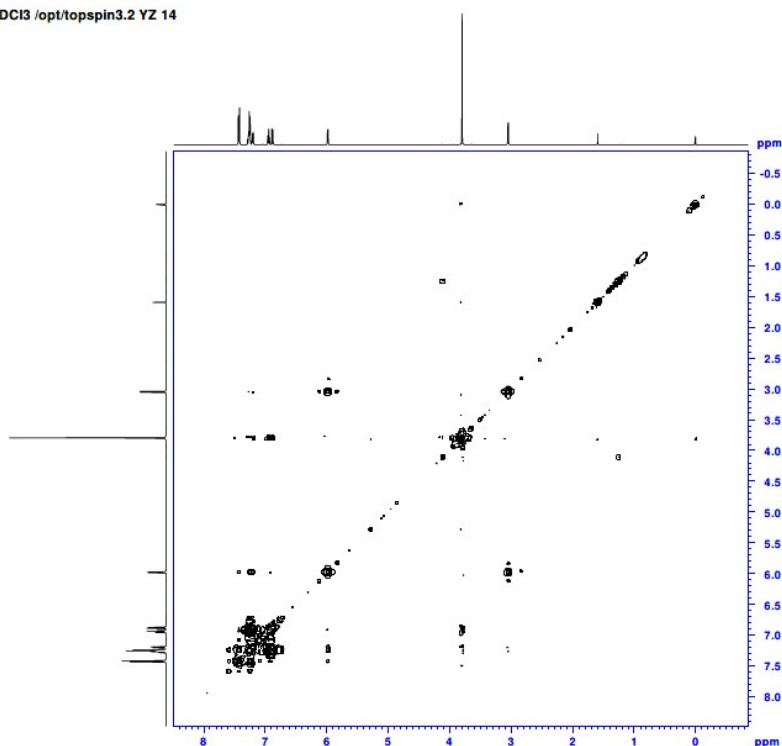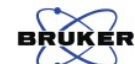

```
Current Data Parameters
NAME      Aug05-2021
EXPNO     1
PROCNO    1

F2 - Acquisition Parameters
Date_     20210805
Time      17:34
INSTRUM   spect
PROBHD    5 mm CPDPR 125
PULPROG   zgpg30
TD         65536
SOLVENT   CDCl3
NS         2
DS         4
SWH        4672.897 Hz
FIDRES     0.116166 Hz
AQ         0.116166 sec
RG         65.01
SQ         187.000 usec
DE         40.00 usec
TE         298.2 K
DO         0.0000000 sec
D1         1.90000000 sec
d11        0.03000000 sec
d12        0.00000000 sec
d13        0.00004000 sec
d14        0.00000000 sec
IN0        0.0001400 sec

===== CHANNEL f1 =====
NUC1       13C
P1         9.10 usec
P17        2300.00 usec
PL1        11.00000000 M
PL12       1.5004997 M

===== GRADIENT CHANNEL =====
GPRAM[1]   SMOG10.100
GPRAM[2]   SMOG10.100
GPRAM[3]   SMOG10.100
GPRAM[4]   SMOG10.100
GPRAM[5]   SMOG10.100
GPRAM[6]   SMOG10.100
GPRAM[7]   SMOG10.100
GPRAM[8]   SMOG10.100
GPRAM[9]   SMOG10.100
GPRAM[10]  SMOG10.100
GPRAM[11]  SMOG10.100
GPRAM[12]  SMOG10.100
GPRAM[13]  SMOG10.100
GPRAM[14]  SMOG10.100
GPRAM[15]  SMOG10.100
GPRAM[16]  SMOG10.100
GPRAM[17]  SMOG10.100
GPRAM[18]  SMOG10.100
GPRAM[19]  SMOG10.100
GPRAM[20]  SMOG10.100
GPRAM[21]  SMOG10.100
GPRAM[22]  SMOG10.100
GPRAM[23]  SMOG10.100
GPRAM[24]  SMOG10.100
GPRAM[25]  SMOG10.100
GPRAM[26]  SMOG10.100
GPRAM[27]  SMOG10.100
GPRAM[28]  SMOG10.100
GPRAM[29]  SMOG10.100
GPRAM[30]  SMOG10.100
GPRAM[31]  SMOG10.100
GPRAM[32]  SMOG10.100
GPRAM[33]  SMOG10.100
GPRAM[34]  SMOG10.100
GPRAM[35]  SMOG10.100
GPRAM[36]  SMOG10.100
GPRAM[37]  SMOG10.100
GPRAM[38]  SMOG10.100
GPRAM[39]  SMOG10.100
GPRAM[40]  SMOG10.100
GPRAM[41]  SMOG10.100
GPRAM[42]  SMOG10.100
GPRAM[43]  SMOG10.100
GPRAM[44]  SMOG10.100
GPRAM[45]  SMOG10.100
GPRAM[46]  SMOG10.100
GPRAM[47]  SMOG10.100
GPRAM[48]  SMOG10.100
GPRAM[49]  SMOG10.100
GPRAM[50]  SMOG10.100
GPRAM[51]  SMOG10.100
GPRAM[52]  SMOG10.100
GPRAM[53]  SMOG10.100
GPRAM[54]  SMOG10.100
GPRAM[55]  SMOG10.100
GPRAM[56]  SMOG10.100
GPRAM[57]  SMOG10.100
GPRAM[58]  SMOG10.100
GPRAM[59]  SMOG10.100
GPRAM[60]  SMOG10.100
GPRAM[61]  SMOG10.100
GPRAM[62]  SMOG10.100
GPRAM[63]  SMOG10.100
GPRAM[64]  SMOG10.100
GPRAM[65]  SMOG10.100
GPRAM[66]  SMOG10.100
GPRAM[67]  SMOG10.100
GPRAM[68]  SMOG10.100
GPRAM[69]  SMOG10.100
GPRAM[70]  SMOG10.100
GPRAM[71]  SMOG10.100
GPRAM[72]  SMOG10.100
GPRAM[73]  SMOG10.100
GPRAM[74]  SMOG10.100
GPRAM[75]  SMOG10.100
GPRAM[76]  SMOG10.100
GPRAM[77]  SMOG10.100
GPRAM[78]  SMOG10.100
GPRAM[79]  SMOG10.100
GPRAM[80]  SMOG10.100
GPRAM[81]  SMOG10.100
GPRAM[82]  SMOG10.100
GPRAM[83]  SMOG10.100
GPRAM[84]  SMOG10.100
GPRAM[85]  SMOG10.100
GPRAM[86]  SMOG10.100
GPRAM[87]  SMOG10.100
GPRAM[88]  SMOG10.100
GPRAM[89]  SMOG10.100
GPRAM[90]  SMOG10.100
GPRAM[91]  SMOG10.100
GPRAM[92]  SMOG10.100
GPRAM[93]  SMOG10.100
GPRAM[94]  SMOG10.100
GPRAM[95]  SMOG10.100
GPRAM[96]  SMOG10.100
GPRAM[97]  SMOG10.100
GPRAM[98]  SMOG10.100
GPRAM[99]  SMOG10.100
GPRAM[100] SMOG10.100

F1 - Acquisition parameters
TD         65536
FIDRES     0.116166 Hz
AQ         0.116166 sec
RG         65.01
SQ         187.000 usec
DE         40.00 usec
TE         298.2 K
DO         0.0000000 sec
D1         1.90000000 sec
d11        0.03000000 sec
d12        0.00000000 sec
d13        0.00004000 sec
d14        0.00000000 sec
IN0        0.0001400 sec

F2 - Processing parameters
SI         1024
SF         500.130184 MHz
WDW         0
SSB         0
LB          0 Hz
GB          0
PC          1.40

F1 - Processing parameters
SI         1024
SF         500.130184 MHz
WDW         0
SSB         0
LB          0 Hz
GB          0
PC          1.40
```

## HSQC (500 MHz, CDCl<sub>3</sub>)

Chemist Ye Zheng  
YZ1053  
HSQC.w CDCl<sub>3</sub> /opt/topspin3.2 YZ 14

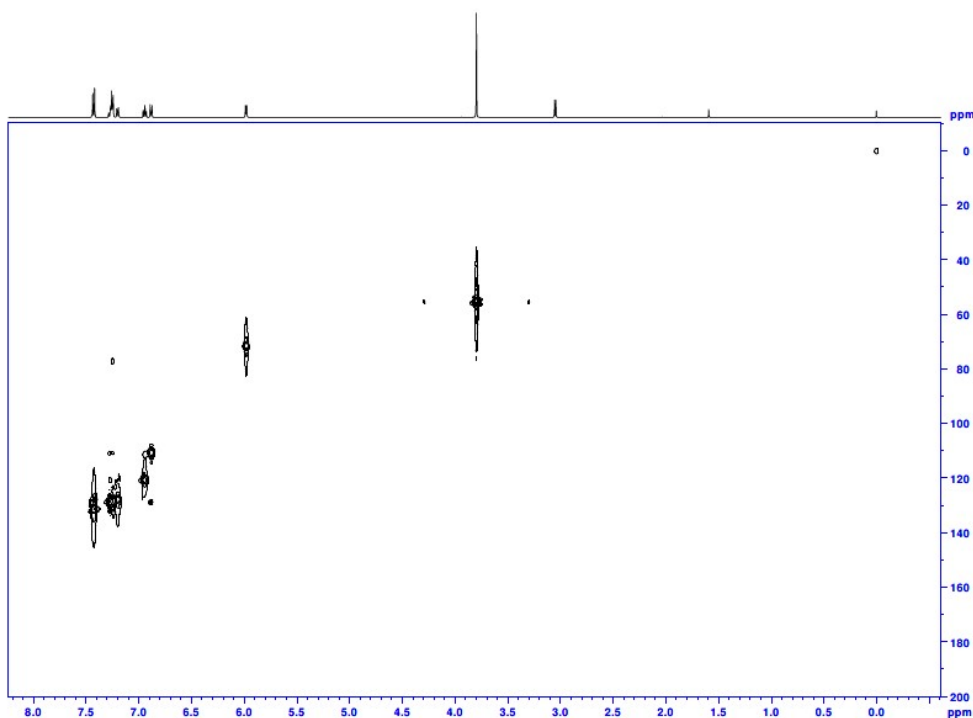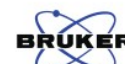

```
Current Data Parameters
NAME      Aug05-2021
EXPNO     1
PROCNO    1

F2 - Acquisition Parameters
Date_     20210805
Time      17:34
INSTRUM   spect
PROBHD    5 mm CPDPR 125
PULPROG   zgpg30
TD         65536
SOLVENT   CDCl3
NS         2
DS         4
SWH        4672.897 Hz
FIDRES     0.116166 Hz
AQ         0.116166 sec
RG         65.01
SQ         187.000 usec
DE         40.00 usec
TE         298.2 K
DO         0.0000000 sec
D1         1.90000000 sec
d11        0.03000000 sec
d12        0.00000000 sec
d13        0.00004000 sec
d14        0.00000000 sec
IN0        0.0001400 sec

===== CHANNEL f1 =====
NUC1       13C
P1         9.10 usec
P17        2300.00 usec
PL1        11.00000000 M
PL12       1.5004997 M

===== GRADIENT CHANNEL =====
GPRAM[1]   SMOG10.100
GPRAM[2]   SMOG10.100
GPRAM[3]   SMOG10.100
GPRAM[4]   SMOG10.100
GPRAM[5]   SMOG10.100
GPRAM[6]   SMOG10.100
GPRAM[7]   SMOG10.100
GPRAM[8]   SMOG10.100
GPRAM[9]   SMOG10.100
GPRAM[10]  SMOG10.100
GPRAM[11]  SMOG10.100
GPRAM[12]  SMOG10.100
GPRAM[13]  SMOG10.100
GPRAM[14]  SMOG10.100
GPRAM[15]  SMOG10.100
GPRAM[16]  SMOG10.100
GPRAM[17]  SMOG10.100
GPRAM[18]  SMOG10.100
GPRAM[19]  SMOG10.100
GPRAM[20]  SMOG10.100
GPRAM[21]  SMOG10.100
GPRAM[22]  SMOG10.100
GPRAM[23]  SMOG10.100
GPRAM[24]  SMOG10.100
GPRAM[25]  SMOG10.100
GPRAM[26]  SMOG10.100
GPRAM[27]  SMOG10.100
GPRAM[28]  SMOG10.100
GPRAM[29]  SMOG10.100
GPRAM[30]  SMOG10.100
GPRAM[31]  SMOG10.100
GPRAM[32]  SMOG10.100
GPRAM[33]  SMOG10.100
GPRAM[34]  SMOG10.100
GPRAM[35]  SMOG10.100
GPRAM[36]  SMOG10.100
GPRAM[37]  SMOG10.100
GPRAM[38]  SMOG10.100
GPRAM[39]  SMOG10.100
GPRAM[40]  SMOG10.100
GPRAM[41]  SMOG10.100
GPRAM[42]  SMOG10.100
GPRAM[43]  SMOG10.100
GPRAM[44]  SMOG10.100
GPRAM[45]  SMOG10.100
GPRAM[46]  SMOG10.100
GPRAM[47]  SMOG10.100
GPRAM[48]  SMOG10.100
GPRAM[49]  SMOG10.100
GPRAM[50]  SMOG10.100
GPRAM[51]  SMOG10.100
GPRAM[52]  SMOG10.100
GPRAM[53]  SMOG10.100
GPRAM[54]  SMOG10.100
GPRAM[55]  SMOG10.100
GPRAM[56]  SMOG10.100
GPRAM[57]  SMOG10.100
GPRAM[58]  SMOG10.100
GPRAM[59]  SMOG10.100
GPRAM[60]  SMOG10.100
GPRAM[61]  SMOG10.100
GPRAM[62]  SMOG10.100
GPRAM[63]  SMOG10.100
GPRAM[64]  SMOG10.100
GPRAM[65]  SMOG10.100
GPRAM[66]  SMOG10.100
GPRAM[67]  SMOG10.100
GPRAM[68]  SMOG10.100
GPRAM[69]  SMOG10.100
GPRAM[70]  SMOG10.100
GPRAM[71]  SMOG10.100
GPRAM[72]  SMOG10.100
GPRAM[73]  SMOG10.100
GPRAM[74]  SMOG10.100
GPRAM[75]  SMOG10.100
GPRAM[76]  SMOG10.100
GPRAM[77]  SMOG10.100
GPRAM[78]  SMOG10.100
GPRAM[79]  SMOG10.100
GPRAM[80]  SMOG10.100
GPRAM[81]  SMOG10.100
GPRAM[82]  SMOG10.100
GPRAM[83]  SMOG10.100
GPRAM[84]  SMOG10.100
GPRAM[85]  SMOG10.100
GPRAM[86]  SMOG10.100
GPRAM[87]  SMOG10.100
GPRAM[88]  SMOG10.100
GPRAM[89]  SMOG10.100
GPRAM[90]  SMOG10.100
GPRAM[91]  SMOG10.100
GPRAM[92]  SMOG10.100
GPRAM[93]  SMOG10.100
GPRAM[94]  SMOG10.100
GPRAM[95]  SMOG10.100
GPRAM[96]  SMOG10.100
GPRAM[97]  SMOG10.100
GPRAM[98]  SMOG10.100
GPRAM[99]  SMOG10.100
GPRAM[100] SMOG10.100

F1 - Acquisition parameters
TD         65536
FIDRES     0.116166 Hz
AQ         0.116166 sec
RG         65.01
SQ         187.000 usec
DE         40.00 usec
TE         298.2 K
DO         0.0000000 sec
D1         1.90000000 sec
d11        0.03000000 sec
d12        0.00000000 sec
d13        0.00004000 sec
d14        0.00000000 sec
IN0        0.0001400 sec

F2 - Processing parameters
SI         1024
SF         500.130184 MHz
WDW         0
SSB         0
LB          0 Hz
GB          0
PC          1.40

F1 - Processing parameters
SI         1024
SF         500.130184 MHz
WDW         0
SSB         0
LB          0 Hz
GB          0
PC          1.40
```

# HMBC (500 MHz, CDCl<sub>3</sub>)

Chemist Ye Zheng  
YZ1053  
HMBC.w CDCl<sub>3</sub> /opt/topspin3.2 YZ 14

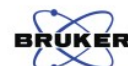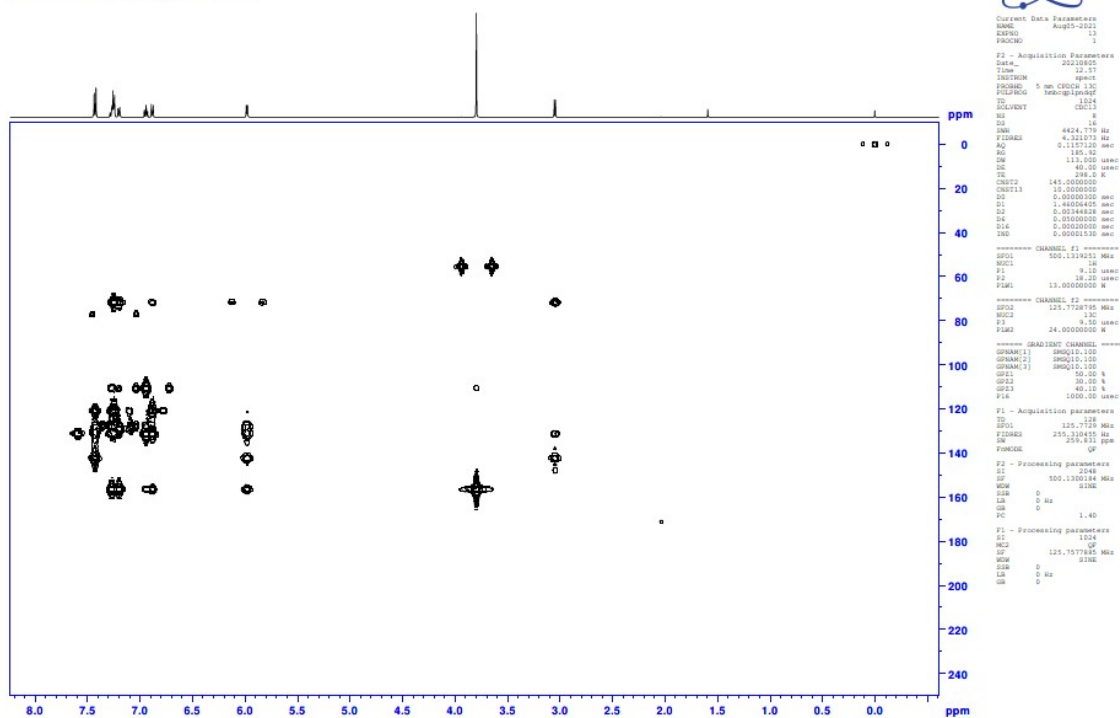

(4-Bromophenyl)(2-methoxyphenyl)methanone.

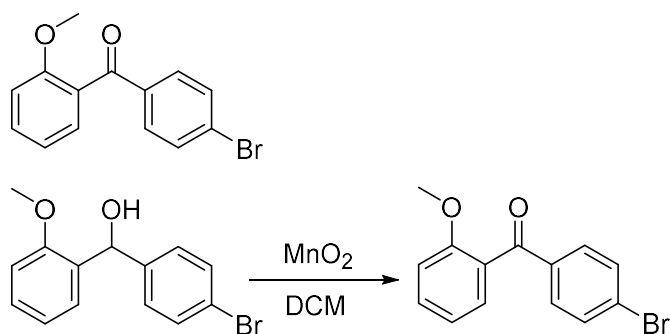

This compound is novel.

To a solution of (4-bromophenyl)(2-methoxyphenyl)methanol (560 mg, 1.92 mmol) in DCM (12 mL) at rt was added manganese dioxide (2.50 g, 28.8 mmol). The reaction mixture was left to stir under a nitrogen atmosphere overnight. TLC (9:1 hexane: EtOAc) after this time indicated full conversion. The solids were removed by gravity filtration and washed with DCM. The combined solvent was removed to give the product a white solid (337 mg, 1.16 mmol, 61%). TLC: R<sub>f</sub> ca 0.40 (9:1 hexane: EtOAc), strong UV and KMnO<sub>4</sub>; Mp: 108°C; HRMS: (found (ESI<sup>+</sup>): [M+H]<sup>+</sup>, Calcd for C<sub>14</sub>H<sub>11</sub><sup>79</sup>BrNaO<sub>2</sub> 312.9831; Found 312.9835; 1.1 ppm error; ν<sub>max</sub> 3091, 2979, 1658, 1599, 1580, 1482, 1451, 1294, 1241, 1065, 1011, 923, 729 cm<sup>-1</sup>; δ<sub>H</sub> (500 MHz, CDCl<sub>3</sub>) 7.67 (2H, d, *J* = 8.5, ArH), 7.57 (2H, d, *J* = 8.5, ArH), 7.50-7.46 (1H, m, ArH), 7.37 (1H, dd, *J* = 7.5, 1.6, ArH), 7.05 (1H, t, *J* = 7.5, ArH), 7.00 (1H, d, *J* = 8.5, ArH), 3.72 (3H, s, OCH<sub>3</sub>) ppm; δ<sub>C</sub> (125 MHz, CDCl<sub>3</sub>) 195.44 (C), 157.34 (C), 136.70 (C), 132.29 (CH), 131.54 (CH), 131.27 (CH), 129.71 (CH), 128.27 (C), 128.04 (C), 120.68 (CH), 111.46 (CH), 55.57 (CH<sub>3</sub>) ppm; m/z (ES-API<sup>+</sup>) 313.0 (M<sup>+</sup> + 23, 100%).



$^1\text{H}$  NMR (500 MHz,  $\text{CDCl}_3$ )

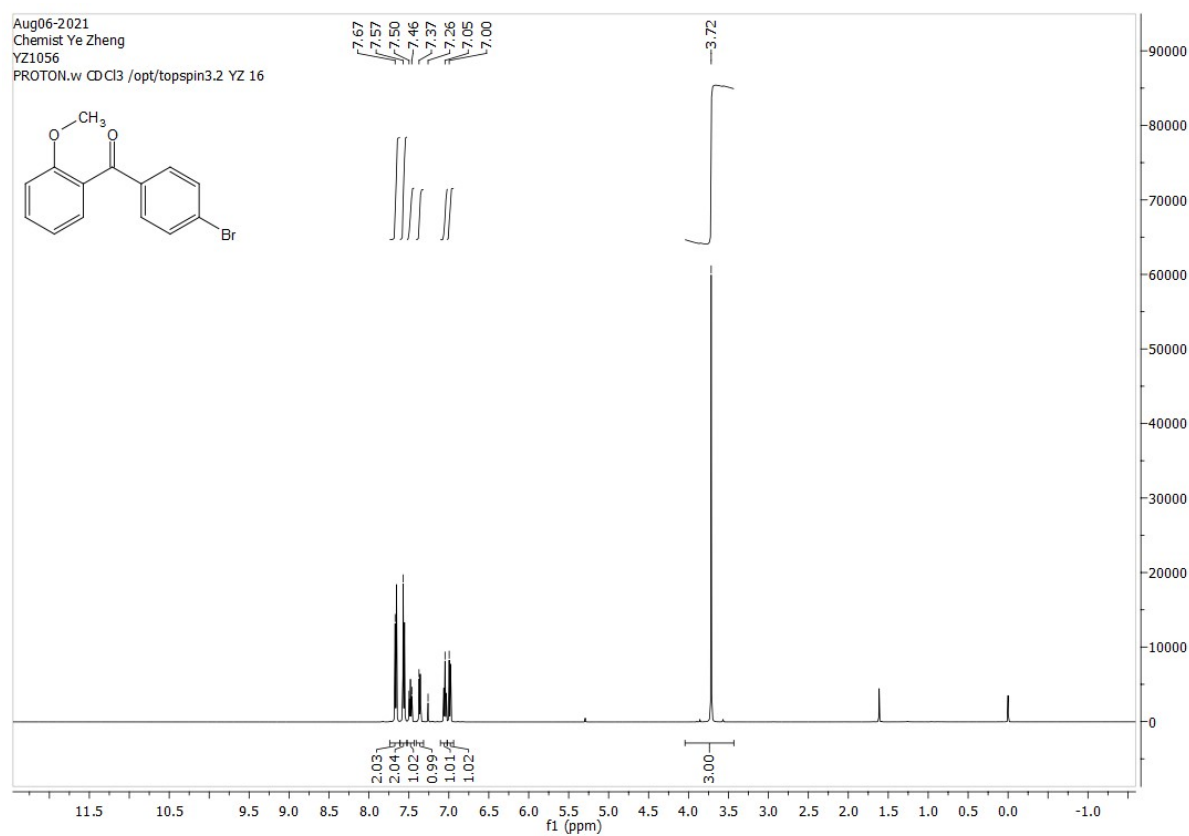

$^{13}\text{C}$  NMR (125 MHz,  $\text{CDCl}_3$ )

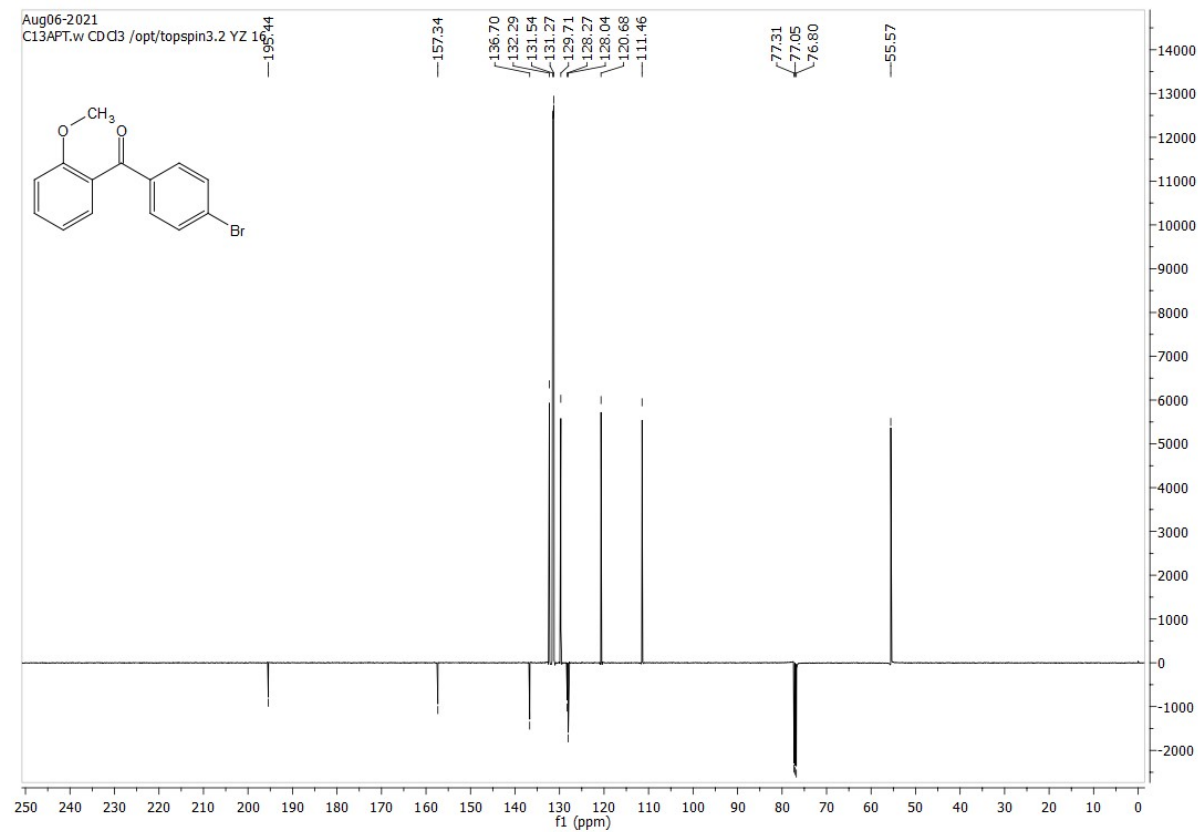

Chemist Ye Zheng  
YZ1056  
COSY.w CDC13 /opt/topspin3.2 YZ 16

**BRUKER**

Current Data Parameters  
NAME YZ1056  
EXPNO 11  
PROCNO 1

F2 - Acquisition Parameters  
Date\_ 20100904  
Time 9:10  
INSTRUM spect  
PROBHD 5 mm CPDQ 13C  
PULPROG zgpg30  
TD 65536  
SOLVENT CDCl3  
NS 1  
DS 8  
SWH 4982.412 Hz  
FIDRES 2.384184 Hz  
AQ 0.1997112 sec  
RG 67.89  
DM 100.450 usec  
DE 45.00 usec  
TE 298.2 K  
D0 0.00000000 sec  
D1 1.00000000 sec  
D11 0.00000000 sec  
D12 0.00000000 sec  
D13 0.00000000 sec  
D14 0.00000000 sec  
D15 0.00000000 sec  
D16 0.00000000 sec  
D17 0.00000000 sec  
D18 0.00000000 sec  
D19 0.00000000 sec  
D20 0.00000000 sec  
D21 0.00000000 sec  
D22 0.00000000 sec  
D23 0.00000000 sec  
D24 0.00000000 sec  
D25 0.00000000 sec  
D26 0.00000000 sec  
D27 0.00000000 sec  
D28 0.00000000 sec  
D29 0.00000000 sec  
D30 0.00000000 sec  
D31 0.00000000 sec  
D32 0.00000000 sec  
D33 0.00000000 sec  
D34 0.00000000 sec  
D35 0.00000000 sec  
D36 0.00000000 sec  
D37 0.00000000 sec  
D38 0.00000000 sec  
D39 0.00000000 sec  
D40 0.00000000 sec  
D41 0.00000000 sec  
D42 0.00000000 sec  
D43 0.00000000 sec  
D44 0.00000000 sec  
D45 0.00000000 sec  
D46 0.00000000 sec  
D47 0.00000000 sec  
D48 0.00000000 sec  
D49 0.00000000 sec  
D50 0.00000000 sec  
D51 0.00000000 sec  
D52 0.00000000 sec  
D53 0.00000000 sec  
D54 0.00000000 sec  
D55 0.00000000 sec  
D56 0.00000000 sec  
D57 0.00000000 sec  
D58 0.00000000 sec  
D59 0.00000000 sec  
D60 0.00000000 sec  
D61 0.00000000 sec  
D62 0.00000000 sec  
D63 0.00000000 sec  
D64 0.00000000 sec  
D65 0.00000000 sec  
D66 0.00000000 sec  
D67 0.00000000 sec  
D68 0.00000000 sec  
D69 0.00000000 sec  
D70 0.00000000 sec  
D71 0.00000000 sec  
D72 0.00000000 sec  
D73 0.00000000 sec  
D74 0.00000000 sec  
D75 0.00000000 sec  
D76 0.00000000 sec  
D77 0.00000000 sec  
D78 0.00000000 sec  
D79 0.00000000 sec  
D80 0.00000000 sec  
D81 0.00000000 sec  
D82 0.00000000 sec  
D83 0.00000000 sec  
D84 0.00000000 sec  
D85 0.00000000 sec  
D86 0.00000000 sec  
D87 0.00000000 sec  
D88 0.00000000 sec  
D89 0.00000000 sec  
D90 0.00000000 sec  
D91 0.00000000 sec  
D92 0.00000000 sec  
D93 0.00000000 sec  
D94 0.00000000 sec  
D95 0.00000000 sec  
D96 0.00000000 sec  
D97 0.00000000 sec  
D98 0.00000000 sec  
D99 0.00000000 sec  
D100 0.00000000 sec  
D101 0.00000000 sec  
D102 0.00000000 sec  
D103 0.00000000 sec  
D104 0.00000000 sec  
D105 0.00000000 sec  
D106 0.00000000 sec  
D107 0.00000000 sec  
D108 0.00000000 sec  
D109 0.00000000 sec  
D110 0.00000000 sec  
D111 0.00000000 sec  
D112 0.00000000 sec  
D113 0.00000000 sec  
D114 0.00000000 sec  
D115 0.00000000 sec  
D116 0.00000000 sec  
D117 0.00000000 sec  
D118 0.00000000 sec  
D119 0.00000000 sec  
D120 0.00000000 sec  
D121 0.00000000 sec  
D122 0.00000000 sec  
D123 0.00000000 sec  
D124 0.00000000 sec  
D125 0.00000000 sec  
D126 0.00000000 sec  
D127 0.00000000 sec  
D128 0.00000000 sec  
D129 0.00000000 sec  
D130 0.00000000 sec  
D131 0.00000000 sec  
D132 0.00000000 sec  
D133 0.00000000 sec  
D134 0.00000000 sec  
D135 0.00000000 sec  
D136 0.00000000 sec  
D137 0.00000000 sec  
D138 0.00000000 sec  
D139 0.00000000 sec  
D140 0.00000000 sec  
D141 0.00000000 sec  
D142 0.00000000 sec  
D143 0.00000000 sec  
D144 0.00000000 sec  
D145 0.00000000 sec  
D146 0.00000000 sec  
D147 0.00000000 sec  
D148 0.00000000 sec  
D149 0.00000000 sec  
D150 0.00000000 sec  
D151 0.00000000 sec  
D152 0.00000000 sec  
D153 0.00000000 sec  
D154 0.00000000 sec  
D155 0.00000000 sec  
D156 0.00000000 sec  
D157 0.00000000 sec  
D158 0.00000000 sec  
D159 0.00000000 sec  
D160 0.00000000 sec  
D161 0.00000000 sec  
D162 0.00000000 sec  
D163 0.00000000 sec  
D164 0.00000000 sec  
D165 0.00000000 sec  
D166 0.00000000 sec  
D167 0.00000000 sec  
D168 0.00000000 sec  
D169 0.00000000 sec  
D170 0.00000000 sec  
D171 0.00000000 sec  
D172 0.00000000 sec  
D173 0.00000000 sec  
D174 0.00000000 sec  
D175 0.00000000 sec  
D176 0.00000000 sec  
D177 0.00000000 sec  
D178 0.00000000 sec  
D179 0.00000000 sec  
D180 0.00000000 sec  
D181 0.00000000 sec  
D182 0.00000000 sec  
D183 0.00000000 sec  
D184 0.00000000 sec  
D185 0.00000000 sec  
D186 0.00000000 sec  
D187 0.00000000 sec  
D188 0.00000000 sec  
D189 0.00000000 sec  
D190 0.00000000 sec  
D191 0.00000000 sec  
D192 0.00000000 sec  
D193 0.00000000 sec  
D194 0.00000000 sec  
D195 0.00000000 sec  
D196 0.00000000 sec  
D197 0.00000000 sec  
D198 0.00000000 sec  
D199 0.00000000 sec  
D200 0.00000000 sec  
D201 0.00000000 sec  
D202 0.00000000 sec  
D203 0.00000000 sec  
D204 0.00000000 sec  
D205 0.00000000 sec  
D206 0.00000000 sec  
D207 0.00000000 sec  
D208 0.00000000 sec  
D209 0.00000000 sec  
D210 0.00000000 sec  
D211 0.00000000 sec  
D212 0.00000000 sec  
D213 0.00000000 sec  
D214 0.00000000 sec  
D215 0.00000000 sec  
D216 0.00000000 sec  
D217 0.00000000 sec  
D218 0.00000000 sec  
D219 0.00000000 sec  
D220 0.00000000 sec  
D221 0.00000000 sec  
D222 0.00000000 sec  
D223 0.00000000 sec  
D224 0.00000000 sec  
D225 0.00000000 sec  
D2

HSQC.w CDCI3 /opt/topspin3.2 YZ 16

**BRUKER**

Current Data Parameters  
NAME Aug4-2021  
EXPNO 1  
PROCNO 1

F2 - Acquisition Parameters  
Date\_ 20210826  
Time 9.56  
INSTRUM spect  
PROBHD 5 mm CPDQX 13C  
PULPROG zgpg30  
PC 1.00  
DELTA 0.001  
SOLVENT CDCl3  
NS 4  
DS 4  
SWH 4829.429 Hz  
FIDRES 0.531125 Hz  
AQ 0.1105000 sec  
RG 105.50  
WE 104.100 usec  
ZG 90.00 usec  
ZD 0.0000000 sec  
CHRG2 145.0000000 sec  
SC 1.40218397 mmc  
SA 0.00170414 sec  
SLL 0.03000000 mmc  
SLA 0.00000000 mmc  
SBO 0.0001890 mmc  
SBOPTD0

===== CHANNEL F1 =====  
NUC1 505.131913 MHz  
NUC2 13C  
P2 18.20 usec  
P2A 18.20 usec  
P2B 18.20 usec  
P2C 18.20 usec  
P2D 18.20 usec  
P2E 18.20 usec  
P2F 18.20 usec  
P2G 18.20 usec  
P2H 18.20 usec  
P2I 18.20 usec  
P2J 18.20 usec  
P2K 18.20 usec  
P2L 18.20 usec  
P2M 18.20 usec  
P2N 18.20 usec  
P2O 18.20 usec  
P2P 18.20 usec  
P2Q 18.20 usec  
P2R 18.20 usec  
P2S 18.20 usec  
P2T 18.20 usec  
P2U 18.20 usec  
P2V 18.20 usec  
P2W 18.20 usec  
P2X 18.20 usec  
P2Y 18.20 usec  
P2Z 18.20 usec  
P2AA 18.20 usec  
P2AB 18.20 usec  
P2AC 18.20 usec  
P2AD 18.20 usec  
P2AE 18.20 usec  
P2AF 18.20 usec  
P2AG 18.20 usec  
P2AH 18.20 usec  
P2AI 18.20 usec  
P2AJ 18.20 usec  
P2AK 18.20 usec  
P2AL 18.20 usec  
P2AM 18.20 usec  
P2AN 18.20 usec  
P2AO 18.20 usec  
P2AP 18.20 usec  
P2AQ 18.20 usec  
P2AR 18.20 usec  
P2AS 18.20 usec  
P2AT 18.20 usec  
P2AU 18.20 usec  
P2AV 18.20 usec  
P2AW 18.20 usec  
P2AX 18.20 usec  
P2AY 18.20 usec  
P2AZ 18.20 usec  
P2BA 18.20 usec  
P2BB 18.20 usec  
P2BC 18.20 usec  
P2BD 18.20 usec  
P2BE 18.20 usec  
P2BF 18.20 usec  
P2BG 18.20 usec  
P2BH 18.20 usec  
P2BI 18.20 usec  
P2BJ 18.20 usec  
P2BK 18.20 usec  
P2BL 18.20 usec  
P2BM 18.20 usec  
P2BN 18.20 usec  
P2BO 18.20 usec  
P2BP 18.20 usec  
P2BQ 18.20 usec  
P2BR 18.20 usec  
P2BS 18.20 usec  
P2BT 18.20 usec  
P2BU 18.20 usec  
P2BV 18.20 usec  
P2BW 18.20 usec  
P2BX 18.20 usec  
P2BY 18.20 usec  
P2BZ 18.20 usec  
P2CA 18.20 usec  
P2CB 18.20 usec  
P2CC 18.20 usec  
P2CD 18.20 usec  
P2CE 18.20 usec  
P2CF 18.20 usec  
P2CG 18.20 usec  
P2CH 18.20 usec  
P2CI 18.20 usec  
P2CJ 18.20 usec  
P2CK 18.20 usec  
P2CL 18.20 usec  
P2CM 18.20 usec  
P2CN 18.20 usec  
P2CO 18.20 usec  
P2CP 18.20 usec  
P2CQ 18.20 usec  
P2CR 18.20 usec  
P2CS 18.20 usec  
P2CT 18.20 usec  
P2CU 18.20 usec  
P2CV 18.20 usec  
P2CW 18.20 usec  
P2CX 18.20 usec  
P2CY 18.20 usec  
P2CZ 18.20 usec  
P2DA 18.20 usec  
P2DB 18.20 usec  
P2DC 18.20 usec  
P2DD 18.20 usec  
P2DE 18.20 usec  
P2DF 18.20 usec  
P2DG 18.20 usec  
P2DH 18.20 usec  
P2DI 18.20 usec  
P2DJ 18.20 usec  
P2DK 18.20 usec  
P2DL 18.20 usec  
P2DM 18.20 usec  
P2DN 18.20 usec  
P2DO 18.20 usec  
P2DP 18.20 usec  
P2DQ 18.20 usec  
P2DR 18.20 usec  
P2DS 18.20 usec  
P2DT 18.20 usec  
P2DU 18.20 usec  
P2DV 18.20 usec  
P2DW 18.20 usec  
P2DX 18.20 usec  
P2DY 18.20 usec  
P2DZ 18.20 usec  
P2EA 18.20 usec  
P2EB 18.20 usec  
P2EC 18.20 usec  
P2ED 18.20 usec  
P2EE 18.20 usec  
P2EF 18.20 usec  
P2EG 18.20 usec  
P2EH 18.20 usec  
P2EI 18.20 usec  
P2EJ 18.20 usec  
P2EK 18.20 usec  
P2EL 18.20 usec  
P2EM 18.20 usec  
P2EN 18.20 usec  
P2EO 18.20 usec  
P2EP 18.20 usec  
P2EQ 18.20 usec  
P2ER 18.20 usec  
P2ES 18.20 usec  
P2ET 18.20 usec  
P2EU 18.20 usec  
P2EV 18.20 usec  
P2EW 18.20 usec  
P2EX 18.20 usec  
P2EY 18.20 usec  
P2EZ 18.20 usec  
P2FA 18.20 usec  
P2FB 18.20 usec  
P2FC 18.20 usec  
P2FD 18.20 usec  
P2FE 18.20 usec  
P2FF 18.20 usec  
P2FG 18.20 usec  
P2FH 18.20 usec  
P2FI 18.20 usec  
P2FJ 18.20 usec  
P2FK 18.20 usec  
P2FL 18.20 usec  
P2FM 18.20 usec  
P2FN 18.20 usec  
P2FO 18.20 usec  
P2FP 18.20 usec  
P2FQ 18.20 usec  
P2FR 18.20 usec  
P2FS 18.20 usec  
P2FT 18.20 usec  
P2FU 18.20 usec  
P2FV 18.20 usec  
P2FW 18.20 usec  
P2FX 18.20 usec  
P2FY 18.20 usec  
P2FZ 18.20 usec  
P2GA 18.20 usec  
P2GB 18.20 usec  
P2GC 18.20 usec  
P2GD 18.20 usec  
P2GE 18.20 usec  
P2GF 18.20 usec  
P2GG 18.20 usec  
P2GH 18.20 usec  
P2GI 18.20 usec  
P2GJ 18.20 usec  
P2GK 18.20 usec  
P2GL 18.20 usec  
P2GM 18.20 usec  
P2GN 18.20 usec  
P2GO 18.20 usec  
P2GP 18.20 usec  
P2GQ 18.20 usec  
P2GR 18.20 usec  
P2GS 18.20 usec  
P2GT 18.20 usec  
P2GU 18.20 usec  
P2GV 18.20 usec  
P2GW 18.20 usec  
P2GX 18.20 usec  
P2GY 18.20 usec  
P2GZ 18.20 usec  
P2HA 18.20 usec  
P2HB 18.20 usec  
P2HC 18.20 usec  
P2HD 18.20 usec  
P2HE 18.20 usec  
P2HF 18.20 usec  
P2HG 18.20 usec  
P2HH 18.20 usec  
P2HI 18.20 usec  
P2HJ 18.20 usec  
P2HK 18.20 usec  
P2HL 18.20 usec  
P2HM 18.20 usec  
P2HN 18.20 usec  
P2HO 18.20 usec  
P2HP 18.20 usec  
P2HQ 18.20 usec  
P2HR 18.20 usec  
P2HS 18.20 usec  
P2HT 18.20 usec  
P2HU 18.20 usec  
P2HV 18.20 usec  
P2HW 18.20 usec  
P2HX 18.20 usec  
P2HY 18.20 usec  
P2HZ 18.20 usec  
P2IA 18.20 usec  
P2IB 18.20 usec  
P2IC 18.20 usec  
P2ID 18.20 usec  
P2IE 18.20 usec  
P2IF 18.20 usec  
P2IG 18.20 usec  
P2IH 18.20 usec  
P2II 18.20 usec  
P2IJ 18.20 usec  
P2IK 18.20 usec  
P2IL 18.20 usec  
P2IM 18.20 usec  
P2IN 18.20 usec  
P2IO 18.20 usec  
P2IP 18.20 usec  
P2IQ 18.20 usec  
P2IR 18.20 usec  
P2IS 18.20 usec  
P2IT 18.20 usec  
P2IU 18.20 usec  
P2IV 18.20 usec  
P2IW 18.20 usec  
P2IX 18.20 usec  
P2IY 18.20 usec  
P2IZ 18.20 usec  
P2JA 18.20 usec  
P2JB 18.20 usec  
P2JC 18.20 usec  
P2JD 18.20 usec  
P2JE 18.20 usec  
P2JF 18.20 usec  
P2JG 18.20 usec  
P2JH 18.20 usec  
P2JI 18.20 usec  
P2JJ 18.20 usec  
P2JK 18.20 usec  
P2JL 18.20 usec  
P2JM 18.20 usec  
P2JN 18.20 usec  
P2JO 18.20 usec  
P2JP 18.20 usec  
P2JQ 18.20 usec  
P2JR 18.20 usec  
P2JS 18.20 usec  
P2JT 18.20 usec  
P2JU 18.20 usec  
P2JV 18.2

# HMBC (500 MHz, CDCl<sub>3</sub>)

HMBC.w CDCl<sub>3</sub>/opt/topspin3.2 YZ 16

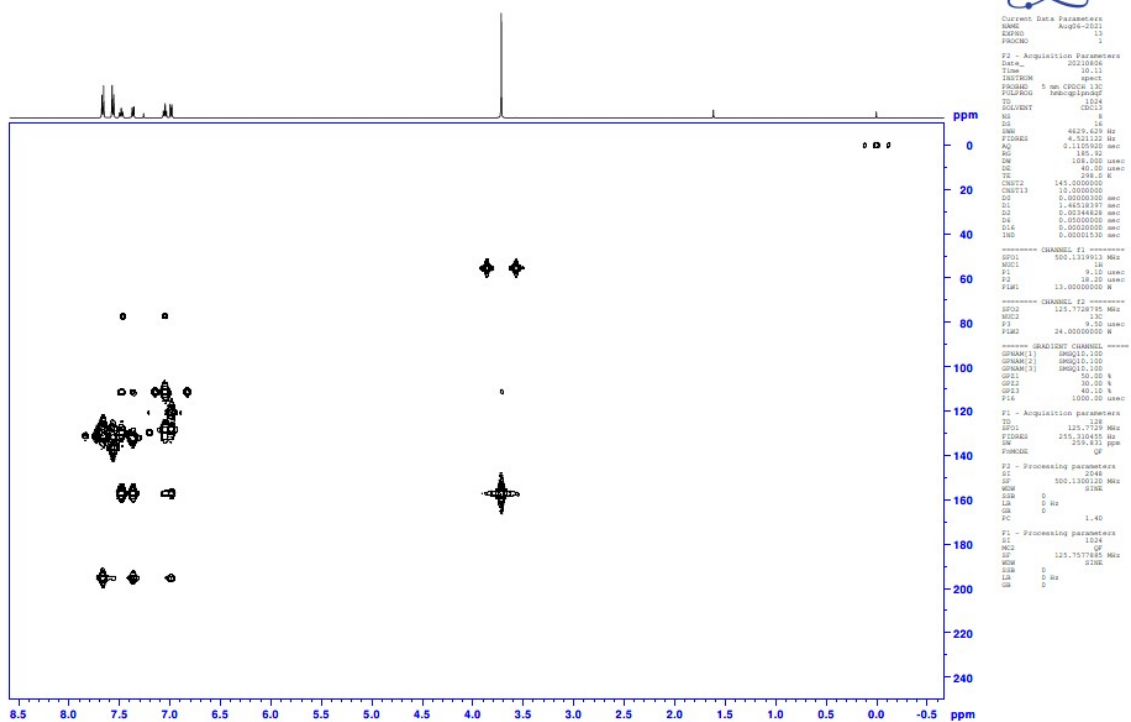

(2-Methoxyphenyl)(4-(4,4,5,5-tetramethyl-1,3,2-dioxaborolan-2-yl)phenyl)methanone.

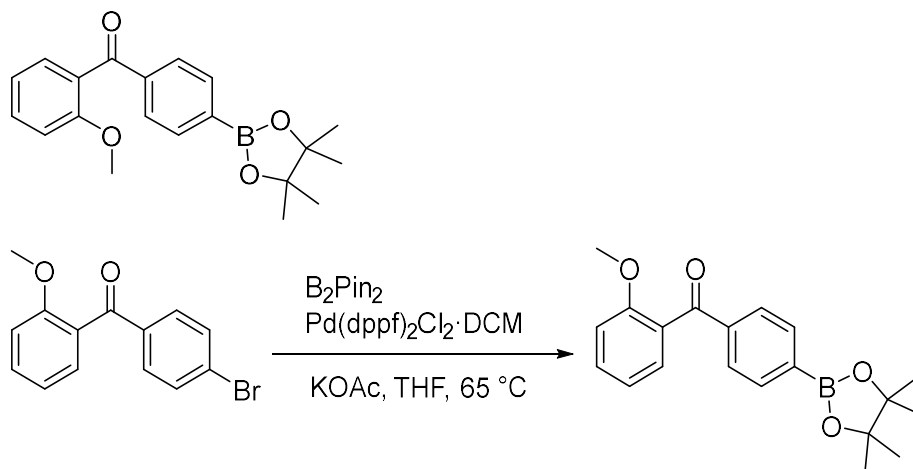

This compound is novel.

A round-bottom flask was charged with (4-bromophenyl)(2-methoxyphenyl)methanone (337 mg, 1.16 mmol), bis(pinacolato)diboron (353 mg, 1.39 mmol), potassium acetate (341 mg, 3.48 mmol), THF (7 mL) and  $Pd(dppf)_2Cl_2 \cdot DCM$  (47.4 mg, 0.0580 mmol). The reaction mixture was heated to 65 °C and left stirring under the nitrogen atmosphere overnight, followed by TLC (9:1 hexane: EtOAc). The mixture was quenched by distilled water (20 mL). EtOAc (20 mL) was added and the organic layer was separated. The aqueous layer was extracted with EtOAc ( $3 \times 20$  mL), and the combined organic layers were dried ( $MgSO_4$ ) and filtered. Solvent was removed to give the crude product. The product was isolated via flash chromatography on silica eluted with 0-20% ethyl acetate in hexane to give (2-methoxyphenyl)(4-(4,4,5,5-tetramethyl-1,3,2-dioxaborolan-2-yl)phenyl)methanone as a white solid (195 mg, 0.577 mmol, 50%). TLC:  $R_f$  ca 0.20 (9:1 hexane: EtOAc), strong UV and  $KMnO_4$ ; Mp: 146 °C; HRMS: (found (ESI<sup>+</sup>):  $[M+H]^+$ , Calcd for  $C_{20}H_{23}BNaO_4$  361.1579; Found 361.1582; 1.7 ppm error;  $\nu_{max}$  2973, 2929, 1662, 1596, 1505, 1484, 1359, 1265, 1207, 1136, 1088, 1024, 946, 848, 757  $cm^{-1}$ ;  $\delta_H$  (500 MHz,  $CDCl_3$ ) 7.86 (2H, d,  $J = 8.1$ , ArH), 7.78 (2H, d,  $J = 8.1$ , ArH), 7.47 (1H, td,  $J = 8.5, 1.7$ , ArH), 7.37 (1H, dd,  $J = 7.5, 1.7$ , ArH), 7.04 (1H, t,  $J = 7.4$ , ArH), 6.99 (1H, d,  $J = 8.4$ , ArH), 3.70 (3H, s,  $OCH_3$ ), 1.35 (12H, s,  $CH_3$ ) ppm;  $\delta_C$  (125 MHz,  $CDCl_3$ ) 196.70 (C), 157.49 (C), 139.93 (C), 134.50 (CH), 132.07 (CH), 129.81 (CH), 128.77 (C), 128.72 (CH), 120.52 (CH), 111.45 (CH), 83.15 (C), 55.57 ( $CH_3$ ), 24.88 ( $CH_3$ ) ppm;  $m/z$  (ES-API<sup>+</sup>) 361.1 ( $M^+ + 23$ , 100%). Enantiomeric excess and conversion

determined by HPLC analysis (Chiralcel ODH, 30 cm x 6mm column, hexane:iPrOH 90:10, 1.0 mL/min, T = 25°C) ketone 6.3 min, *R* and *S* isomers 9.1 min and 11.6 min.

$^1\text{H}$  NMR (500 MHz,  $\text{CDCl}_3$ )

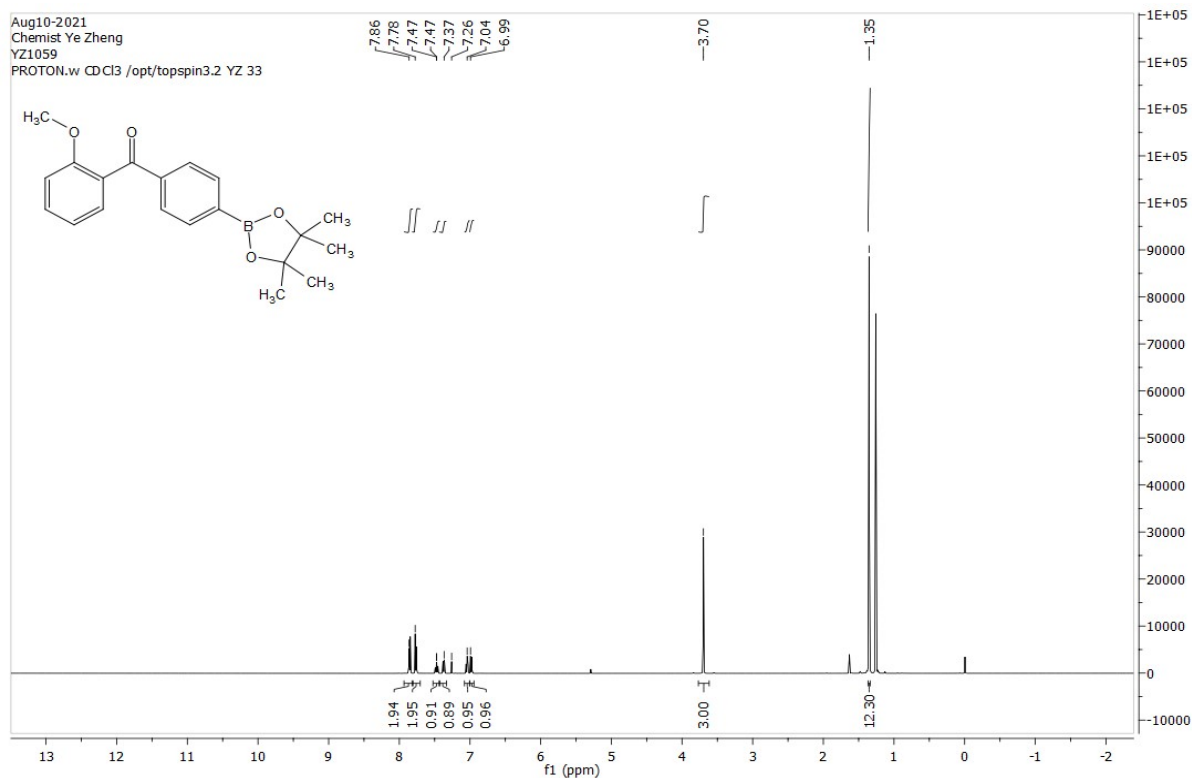

$^{13}\text{C}$  NMR (125 MHz,  $\text{CDCl}_3$ )

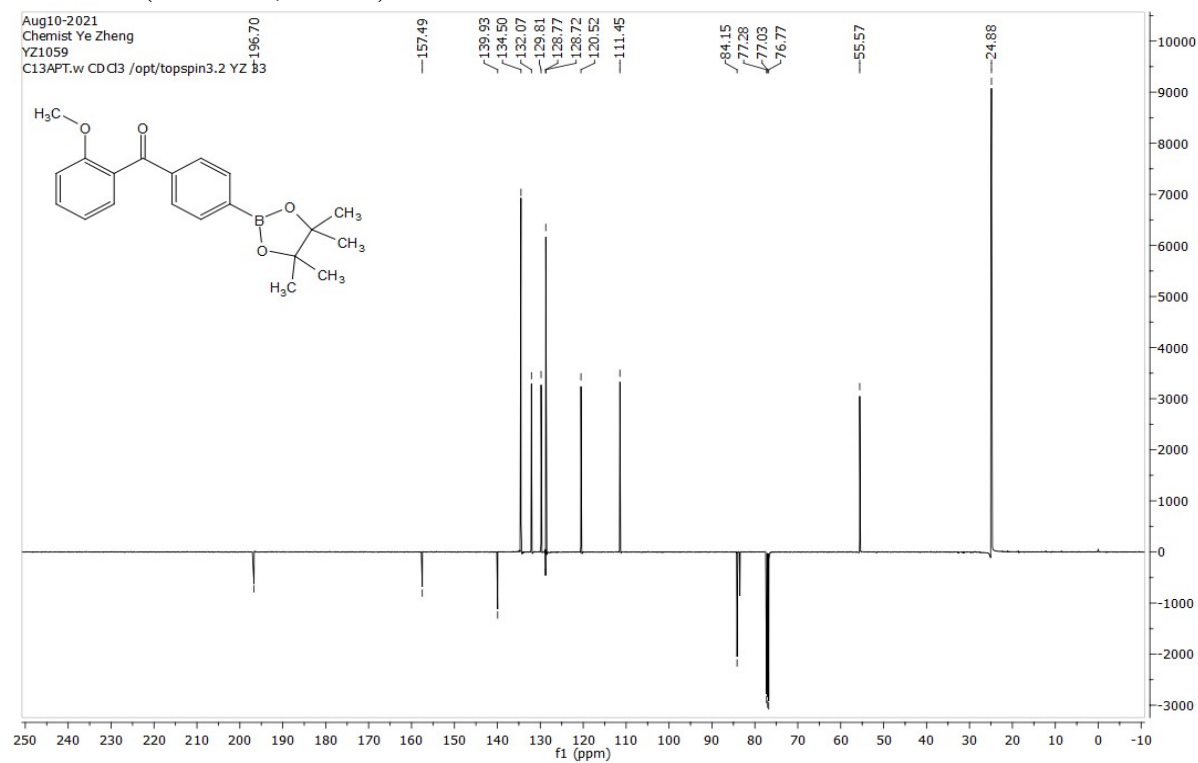

## COSY (500 MHz, CDCl<sub>3</sub>)

Chemist Ye Zheng  
YZ1059  
COSY.w CDCl<sub>3</sub> /opt/topspin3.2 YZ 33

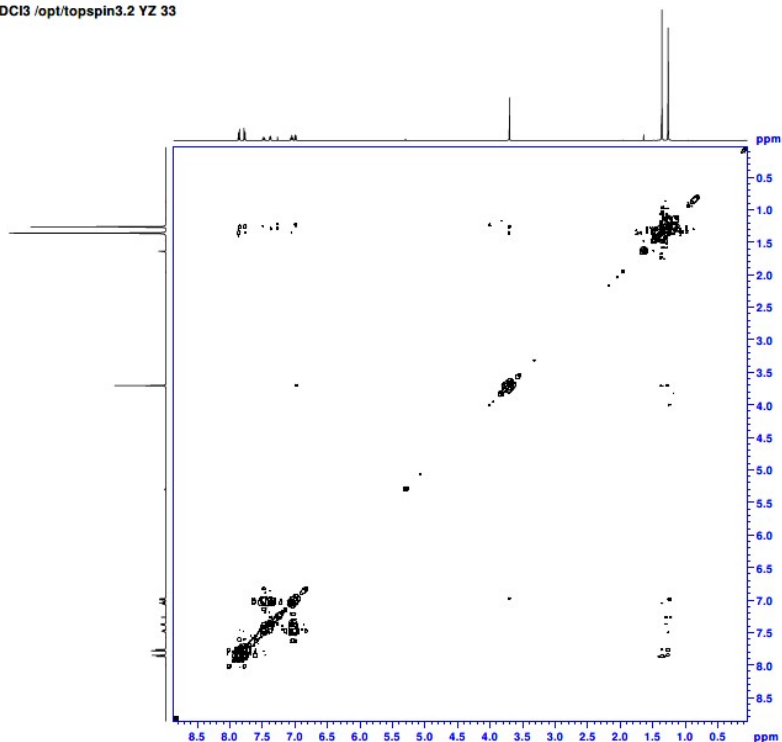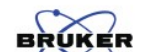

```
Current Data Parameters
NAME      Aug10-2021
EXPNO     1
PROCNO    1

F2 - Acquisition Parameters
Date_     20210810
Time      12.02
INSTRUM   spect
PROBHD    5 mm CPQPC 13C
PULPROG   coesypprog
TD         65536
SOLVENT   CDCl3
NS         4
DS         4
SWH        4411.743 Hz
FIDRES     2.154182 Hz
AQ         0.2321047 sec
RG         37.49
DM         113.333 usec
DE         40.00 usec
TE         298.2 K
DQ         0.0000000 sec
SFO1       500.1322707 MHz
NUC1       13C
P1         9.10 usec
P2         28.10 usec
P2F1       13.0000000 Hz
P1F1       1.5824997 Hz

===== CHANNEL F1 =====
SFO1       500.1322707 MHz
NUC1       13C
P1         9.10 usec
P2         28.10 usec
P2F1       13.0000000 Hz
P1F1       1.5824997 Hz

===== GRADIENT CHANNEL =====
GPRAM[1]   SMO10.100
GPRAM[2]   SMO10.100
OP1        60.10 Hz
OP2        1000.00 usec

F1 - Acquisition parameters
TD         132
SFO1       500.1322707 MHz
FIDRES     34.507507 Hz
SW         4.432 ppm
P2MODE     QF

F2 - Processing parameters
SI         1024
SF         500.1301000 MHz
WDW        EM
SSB         0 Hz
LA         0 Hz
GB         0
PC         1.40

F1 - Processing parameters
SI         1024
SF         500.1301000 MHz
WDW        EM
SSB         0 Hz
LA         0 Hz
GB         0
PC         1.40
```

## HSQC (500 MHz, CDCl<sub>3</sub>)

Chemist Ye Zheng  
YZ1059  
HSQC.w CDCl<sub>3</sub> /opt/topspin3.2 YZ 33

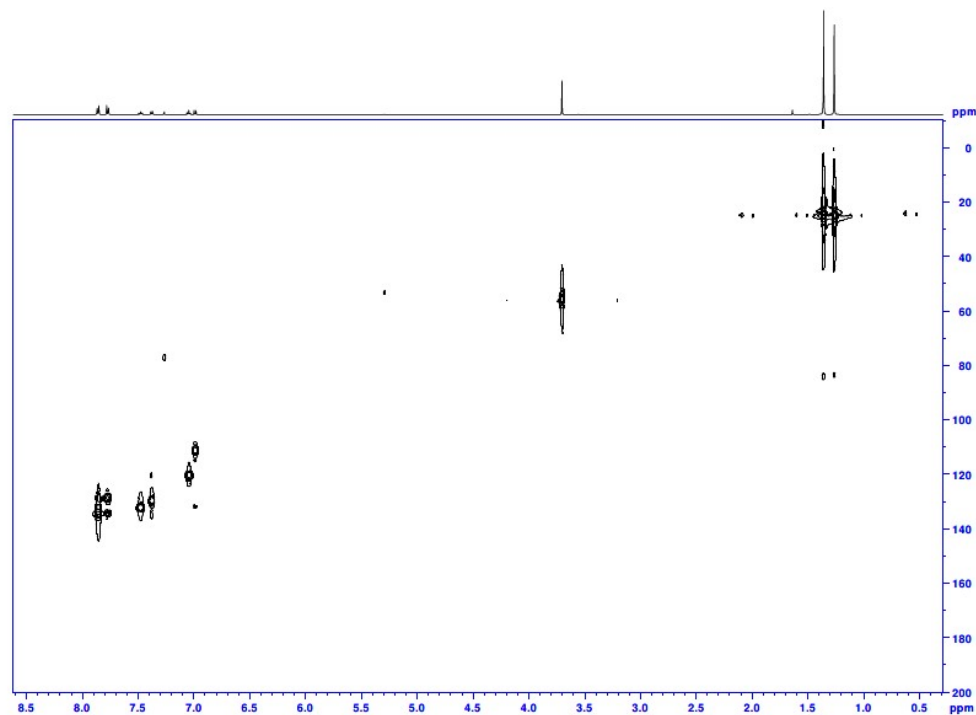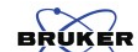

```
Current Data Parameters
NAME      Aug10-2021
EXPNO     1
PROCNO    1

F2 - Acquisition Parameters
Date_     20210810
Time      12.02
INSTRUM   spect
PROBHD    5 mm CPQPC 13C
PULPROG   hsqcprog
TD         65536
SOLVENT   CDCl3
NS         4
DS         4
SWH        4166.637 Hz
FIDRES     4.048010 Hz
AQ         0.1228850 sec
RG         180.30
DM         105.000 usec
DE         40.00 usec
TE         298.2 K
DQ         0.0000000 sec
SFO1       500.1322707 MHz
NUC1       13C
P1         9.10 usec
P2         28.10 usec
P2F1       13.0000000 Hz
P1F1       1.5824997 Hz

===== CHANNEL F1 =====
SFO1       500.1322707 MHz
NUC1       13C
P1         9.10 usec
P2         28.10 usec
P2F1       13.0000000 Hz
P1F1       1.5824997 Hz

===== CHANNEL F2 =====
SFO2       125.7677555 MHz
NUC2       13C
CPDPRG2    gpgp
P3         9.10 usec
P4         29.10 usec
P3PD2      24.0000000 Hz
P4PD2      0.5124600 Hz

===== GRADIENT CHANNEL =====
GPRAM[1]   SMO10.100
GPRAM[2]   SMO10.100
OP1        60.10 Hz
OP2        1000.00 usec
F1 - Acquisition parameters
TD         132
SFO1       125.7677555 MHz
FIDRES     204.079961 Hz
SW         210.345 ppm
P2MODE     QF

F2 - Processing parameters
SI         1024
SF         125.7577685 MHz
WDW        EM
SSB         0 Hz
LA         0 Hz
GB         0
PC         1.40

F1 - Processing parameters
SI         1024
SF         125.7577685 MHz
WDW        EM
SSB         0 Hz
LA         0 Hz
GB         0
PC         1.40
```

# HMBC (500 MHz, CDCl<sub>3</sub>)

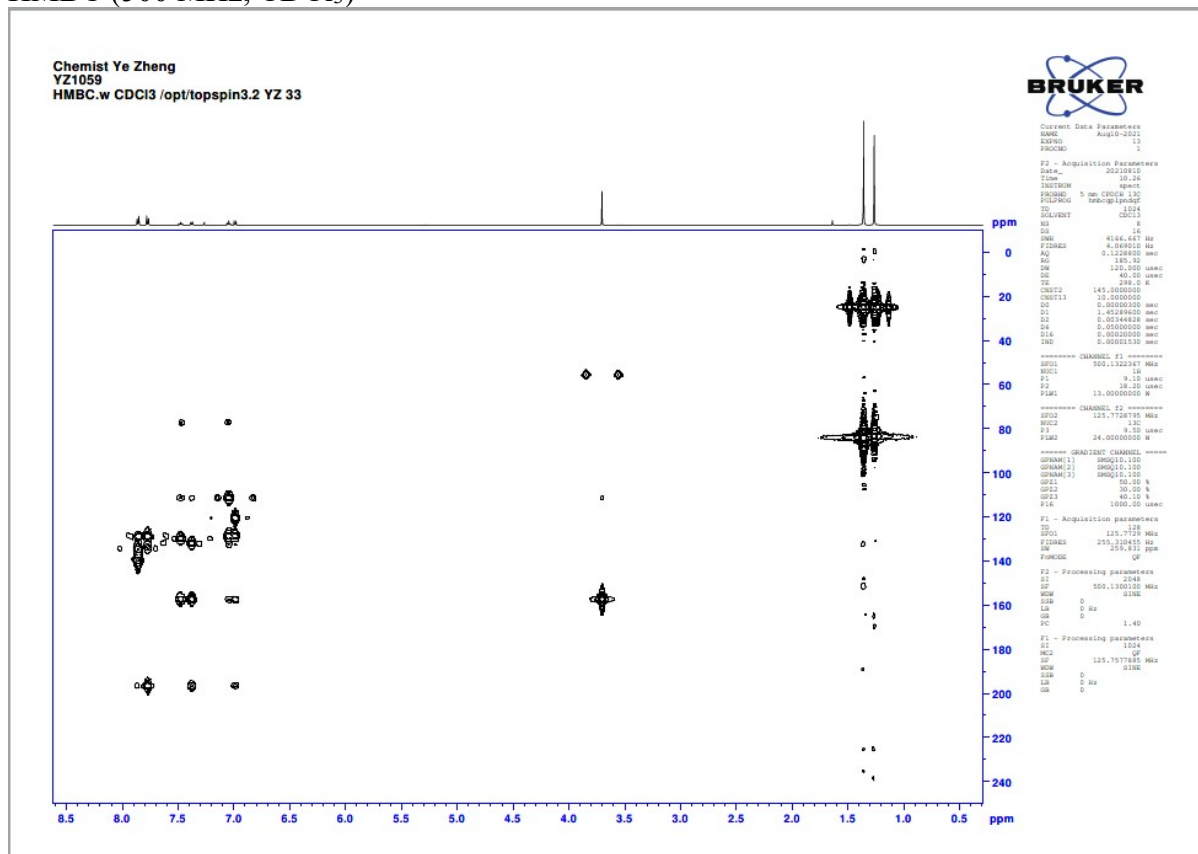

## HPLC of (2-methoxyphenyl)(4-(4,4,5,5-tetramethyl-1,3,2-dioxaborolan-2-yl)phenyl)methanone

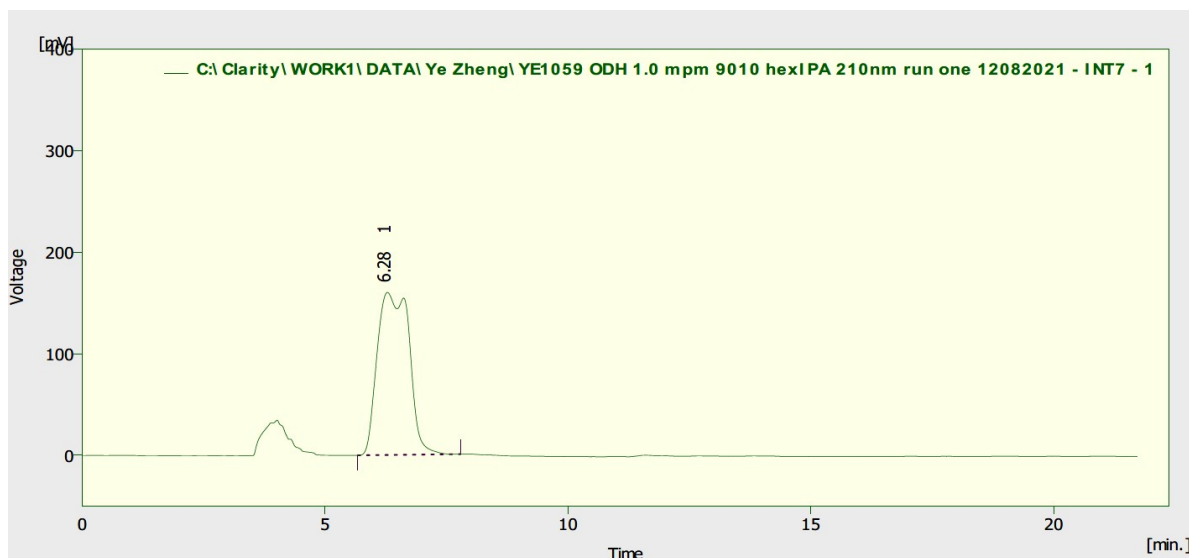

Result Table (Uncal - C:\Clarity\WORK1\DATA\Ye Zheng\YE1059 ODH 1.0 ppm 9010 hexIPA 210nm run one 12082021 - INT7 - 1)

|   | Reten. Time<br>[min] | Area<br>[mV.s] | Height<br>[mV] | Area<br>[%] | Height<br>[%] | W05<br>[min] | Compound<br>Name |
|---|----------------------|----------------|----------------|-------------|---------------|--------------|------------------|
| 1 | 6.280                | 7324.343       | 160.069        | 100.0       | 100.0         | 0.76         |                  |
|   | Total                | 7324.343       | 160.069        | 100.0       | 100.0         |              |                  |

(2-Methoxyphenyl)(4-(4,4,5,5-tetramethyl-1,3,2-dioxaborolan-2-yl)phenyl)methanol

**23.**

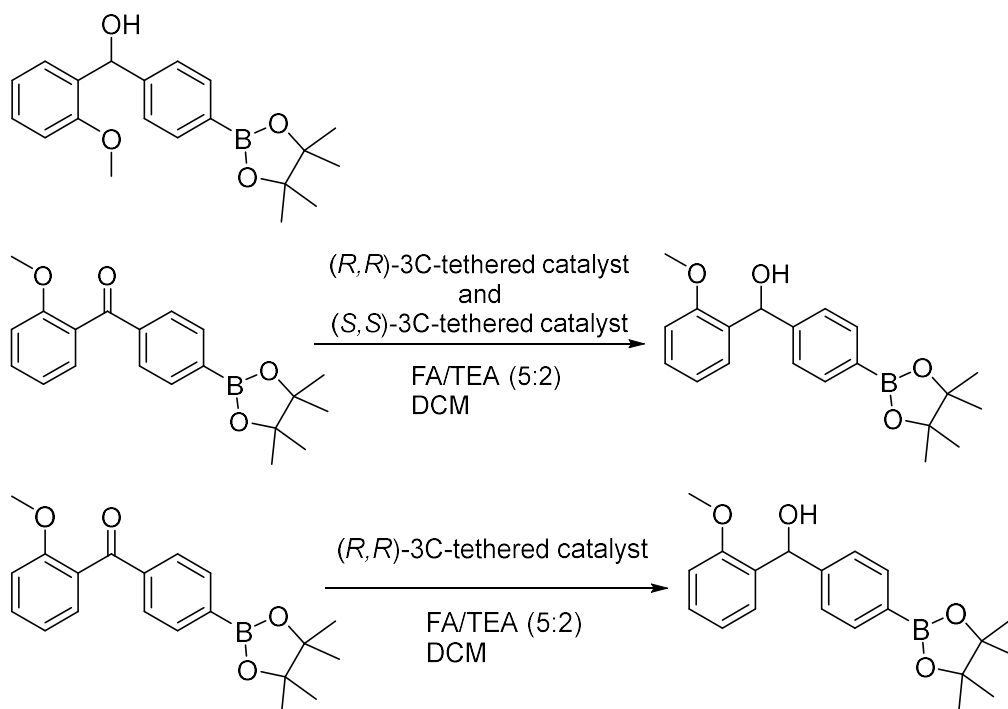

This compound is novel.

**Synthesis of a racemic standard:**

(*R,R*)-3C-Tethered Ru(II)-TsDPEN catalyst **2** (0.738 mg, 1.19  $\mu$ mol, 0.5 mol%) and (*S,S*)-3C-tethered Ru(II)-TsDPEN catalyst **2** (0.738 mg, 1.19  $\mu$ mol, 0.5 mol%) were added to FA: TEA (5:2 azeotropic mixture, 0.36 mL) at rt and the mixture was stirred under a nitrogen atmosphere for 15 minutes; after which a solution of (2-methoxyphenyl)(4-(4,4,5,5-tetramethyl-1,3,2-dioxaborolan-2-yl)phenyl)methanone (80.0 mg, 0.237 mmol) in DCM (0.50 mL) was added. The reaction mixture was stirred under a nitrogen atmosphere and followed by TLC (4:1 hexane: EtOAc). After 72 hours, the reaction was quenched using saturated NaHCO<sub>3</sub> solution (20 mL). EtOAc (20 mL) was added and the organic layer was separated. The aqueous layer was extracted with EtOAc (3 x 20 mL) and the combined organic layers were dried (MgSO<sub>4</sub>) and filtered. The solvent was removed to give the crude product. The product was isolated via flash chromatography on silica eluted with 0-50% EtOAc in hexane to give (2-methoxyphenyl)(4-(4,4,5,5-tetramethyl-1,3,2-dioxaborolan-2-yl)phenyl)methanol **23** as a colorless oil (64.0 mg, 0.188 mmol, 80%). TLC: R<sub>f</sub> ca 0.20 (4:1 hexane: EtOAc), strong UV and KMnO<sub>4</sub>; HRMS: (found (ESI<sup>+</sup>): [M+H]<sup>+</sup>, Calcd for C<sub>20</sub>H<sub>25</sub>BNaO<sub>4</sub> 363.1738; Found 363.1738; 1.0 ppm error;  $\nu_{\text{max}}$  3323 (br),



2978, 2936, 2837, 1611, 1489, 1463, 1298, 1240, 1164, 1048, 962  $\text{cm}^{-1}$ ;  $\delta_{\text{H}}$  (500 MHz,  $\text{CDCl}_3$ ) 7.78 (2H, d,  $J = 8.0$ , ArH), 7.40 (2H, d,  $J = 8.0$ , ArH), 7.25-7.18 (2H, m, ArH), 6.94-6.86 (2H, m, ArH), 6.06 (1H, d,  $J = 5.6$ , ArCH), 3.79 (3H, s,  $\text{OCH}_3$ ), 3.07 (1H, d,  $J = 5.6$ , OH), 1.33 (12H, s,  $\text{CH}_3$ ) ppm;  $\delta_{\text{C}}$  (125 MHz,  $\text{CDCl}_3$ ) 156.77 (C), 146.45 (C), 134.69 (CH), 131.81 (C), 128.82 (CH), 128.00 (CH), 125.83 (CH), 120.83 (CH), 110.77 (CH), 83.73 (C), 72.34 (CH), 55.42 ( $\text{CH}_3$ ), 24.88 ( $\text{CH}_3$ ) ppm;  $m/z$  (ES-API+) 363.2 ( $\text{M}^+ + 23$ , 100%).

Enantiomeric excess and conversion determined by HPLC analysis (Chiralcel ODH, 30 cm x 6mm column, hexane:iPrOH 90:10, 1.0 mL/min,  $T = 25^\circ\text{C}$ ) ketone 6.3 min, *R* and *S* isomers 9.1 min and 11.6 min, configuration is not confirmed.

ATH of (2-methoxyphenyl)(4-(4,4,5,5-tetramethyl-1,3,2-dioxaborolan-2-yl)phenyl)methanone.

(*R,R*)-3C-tethered Ru(II)-TsDPEN catalyst **2** (1.47 mg, 2.37  $\mu\text{mol}$ , 1 mol%) was added to FA: TEA (5:2 azeotropic mixture, 0.36 mL) at rt and the mixture was stirred under a nitrogen atmosphere for 15 minutes; after which a solution of (2-methoxyphenyl)(4-(4,4,5,5-tetramethyl-1,3,2-dioxaborolan-2-yl)phenyl)methanone (80.0 mg, 0.237 mmol) in DCM (0.50 mL) was added. The reaction mixture was stirred under a nitrogen atmosphere and followed by TLC (4:1 hexane: EtOAc). After 72 hours, the reaction was quenched using saturated  $\text{NaHCO}_3$  solution (20 mL). EtOAc (20 mL) was added and the organic layer was separated. The aqueous layer was extracted with EtOAc (3 x 20 mL) and the combined organic layers were dried ( $\text{MgSO}_4$ ) and filtered. The solvent was removed to give the crude product. The product was isolated via flash chromatography on silica eluted with 0-50% EtOAc in hexane to give (2-methoxyphenyl)(4-(4,4,5,5-tetramethyl-1,3,2-dioxaborolan-2-yl)phenyl)methanol **23** as a colorless oil (50.8 mg, 0.150 mmol, 63%). The reaction was also followed by HPLC (Chiralcel ODH, 30 cm x 6mm column, hexane:iPrOH 90:10, 1.0 mL/min,  $T = 25^\circ\text{C}$ ):  $[\alpha]_{\text{D}}^{26} -27.1$  (c 0.376 in  $\text{CHCl}_3$ ) 55% ee.

<sup>1</sup>H NMR (500 MHz, CDCl<sub>3</sub>)

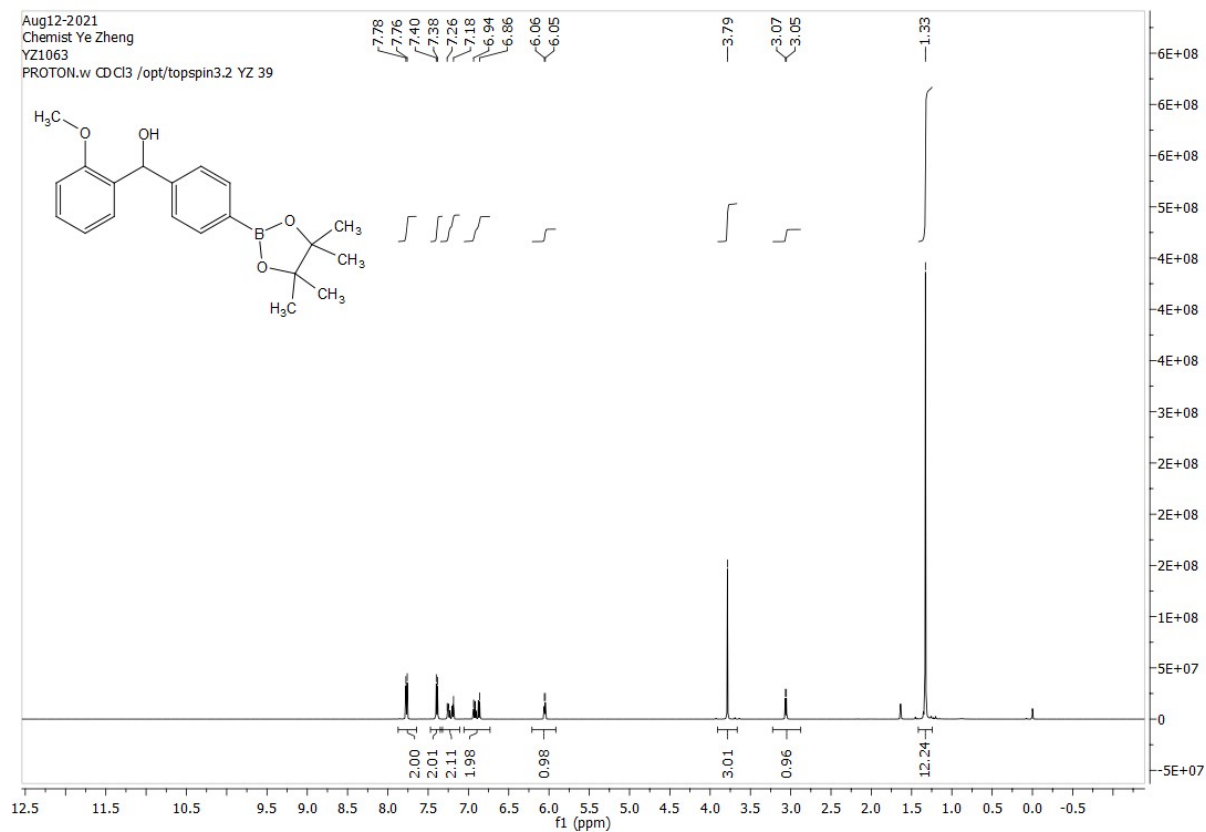

<sup>13</sup>C NMR (125 MHz, CDCl<sub>3</sub>)

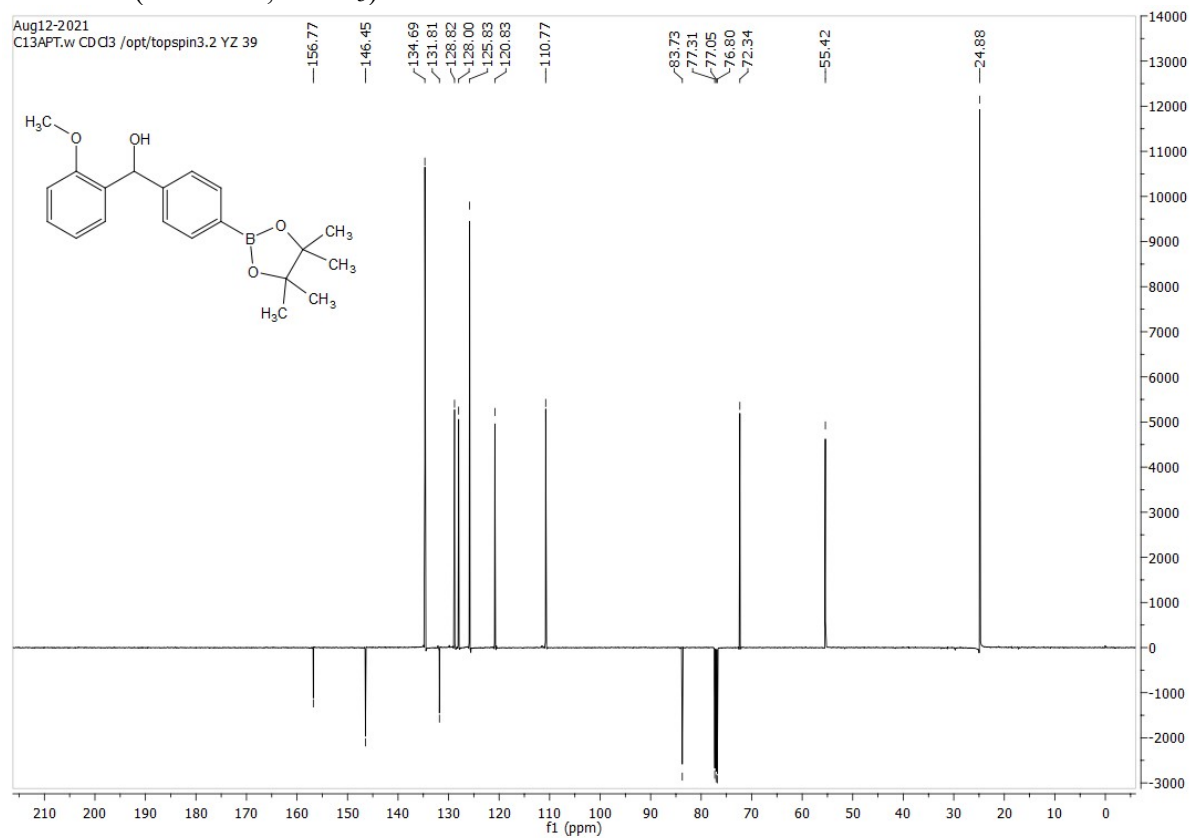

## COSY (500 MHz, CDCl<sub>3</sub>)

Chemist Ye Zheng  
YZ1063  
COSY.w CDCl<sub>3</sub> /opt/topspin3.2 YZ 39

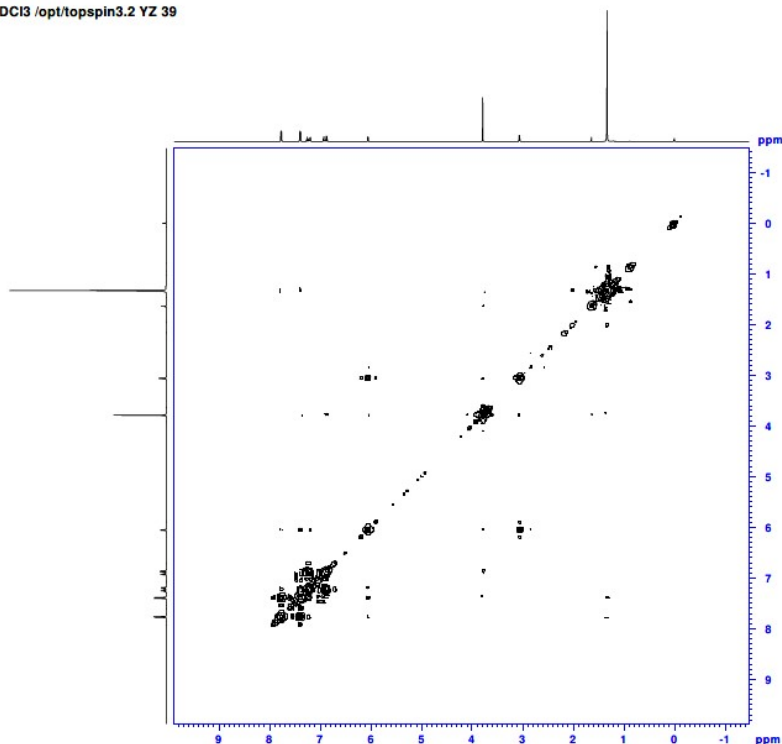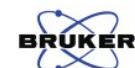

```
Current Data Parameters
NAME      Aug12-2021
EXPNO    1
PROCNO    1

F2 - Acquisition Parameters
Date_     20210812
Time      15.54
INSTRUM   spect
PROBHD    5 mm CPQCH 13C
PULPROG   zgpg30
TD         65536
SOLVENT    CDCl3
NS         1
DS         4
SWH        5681.818 Hz
FIDRES     2.174325 Hz
AQ         0.1802240 sec
RG         34.82
AQ         88.000 usec
DE         40.00 usec
TE         298.2 K
D2         0.00000000 sec
D1         1.98333334 sec
D11        0.03000000 sec
D12        0.00000000 sec
D13        0.00000000 sec
D14        0.00000000 sec
D15        0.00017400 sec

===== CHANNEL f1 =====
NUC1       13C
P1         9.10 usec
P12        2500.00 usec
P14        13.00000000 Hz
P1410     1.55049997 Hz

===== GRADIENT CHANNEL =====
GRAM1[1]   SHHG10.100
US11       10.00 Hz
P14        1000.00 usec

F1 - Acquisition parameters
TD         128
FIDRES     500.130168 MHz
FIDRES     44.388204 Hz
SW         11.347 Hz
FREQDE     0 Hz

F2 - Processing parameters
SI         3274
SF         500.1300168 MHz
WDW        0
SSB        0
GB         0
PC         1.40

F1 - Processing parameters
SI         1024
SF         500.1300168 MHz
WDW        0
SSB        0
GB         0
PC         1.40
```

## HSQC (500 MHz, CDCl<sub>3</sub>)

Chemist Ye Zheng  
YZ1063  
HSQC.w CDCl<sub>3</sub> /opt/topspin3.2 YZ 39

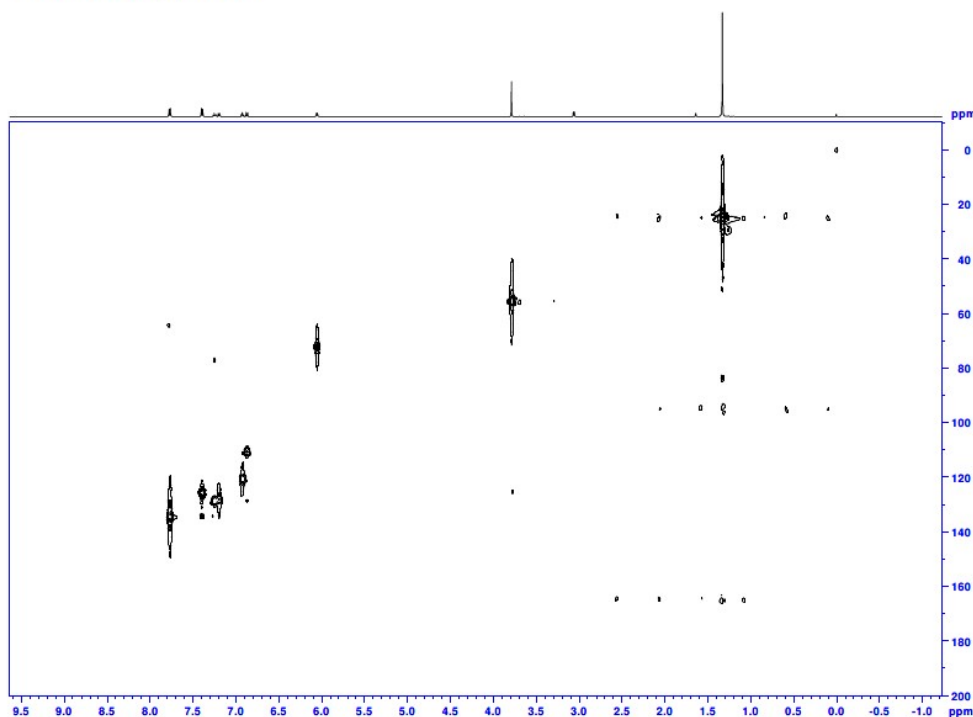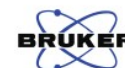

```
Current Data Parameters
NAME      Aug12-2021
EXPNO    1
PROCNO    1

F2 - Acquisition Parameters
Date_     20210812
Time      16.00
INSTRUM   spect
PROBHD    5 mm CPQCH 13C
PULPROG   zgpg30
TD         65536
SOLVENT    CDCl3
NS         1
DS         4
SWH        5681.818 Hz
FIDRES     2.174325 Hz
AQ         0.1802240 sec
RG         34.82
AQ         88.000 usec
DE         40.00 usec
TE         298.2 K
D2         0.00000000 sec
D1         1.98333334 sec
D11        0.03000000 sec
D12        0.00000000 sec
D13        0.00000000 sec
D14        0.00017400 sec
D15        0.00017400 sec

===== CHANNEL f1 =====
NUC1       13C
P1         9.10 usec
P12        2500.00 usec
P14        13.00000000 Hz
P1410     1.55049997 Hz

===== CHANNEL f2 =====
SF2        125.7607315 MHz
NUC2       13C
CPDPRG2    zgpg
P2         9.10 usec
P212       29.00 usec
P2121     40.00 usec
P21211    24.00000000 Hz
P212111   0.03000000 Hz

===== GRADIENT CHANNEL =====
GRAM1[1]   SHHG10.100
GRAM2[2]   SHHG10.100
US11       10.00 Hz
US12       10.00 Hz
P14        1000.00 usec

F1 - Acquisition parameters
TD         128
SF         125.7607315 MHz
FIDRES     204.479901 Hz
SW         216.340 MHz
FREQDE     Echo-Antiecho

F2 - Processing parameters
SI         1024
SF         500.1300168 MHz
WDW        0
SSB        0
GB         0
PC         1.40

F1 - Processing parameters
SI         1024
SF         125.7607315 MHz
WDW        0
SSB        0
GB         0
PC         1.40
```

# HMBC (500 MHz, CDCl<sub>3</sub>)

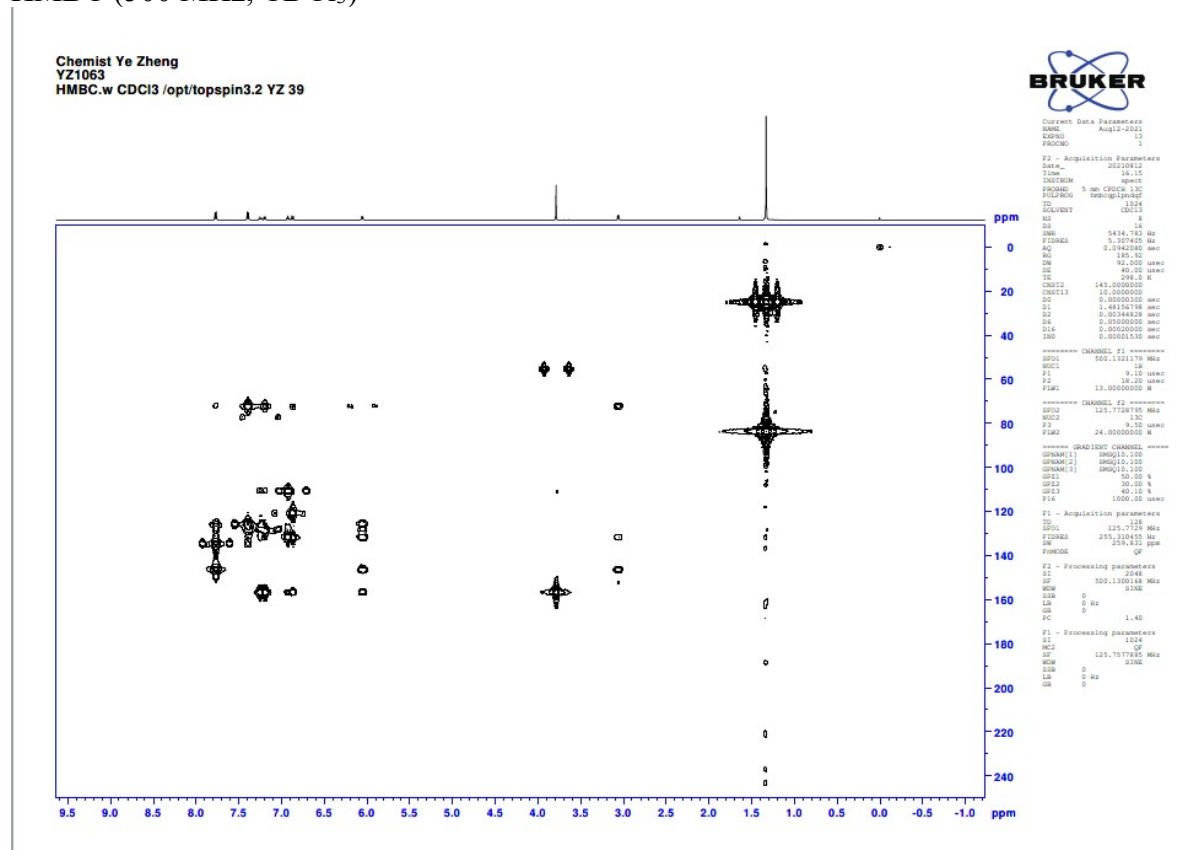

HPLC of racemic (2-methoxyphenyl)(4-(4,4,5,5-tetramethyl-1,3,2-dioxaborolan-2-yl)phenyl)methanol **23**.

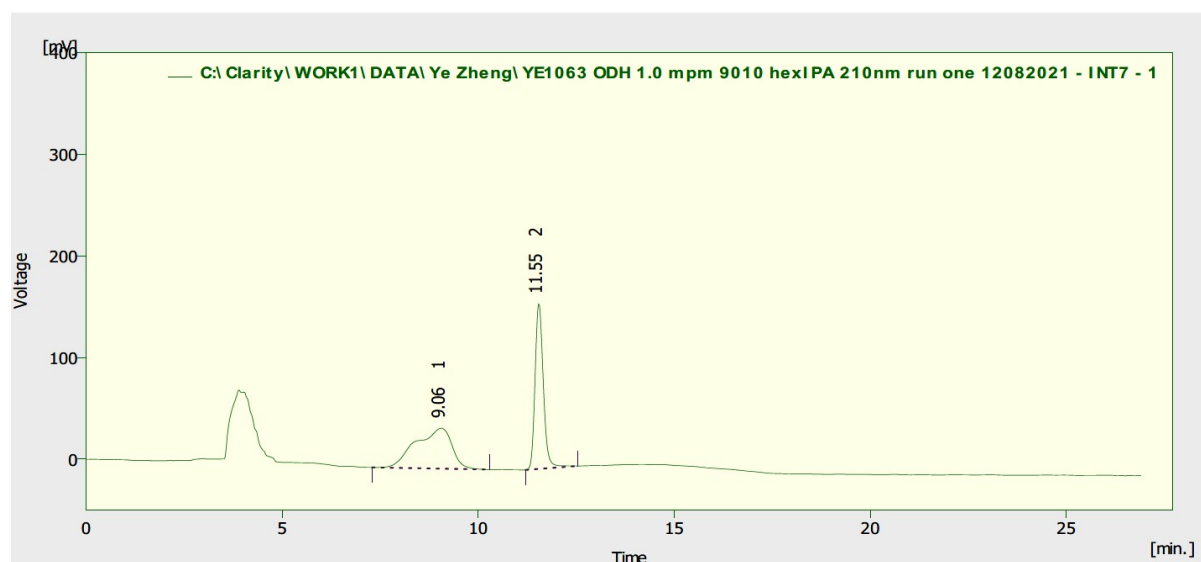

Result Table (Uncal - C:\Clarity\WORK1\DATA\Ye Zheng\YE1063 ODH 1.0 mpm 9010 hexIPA 210nm run one 12082021 - INT7 - 1)

|   | Reten. Time [min] | Area [mV.s] | Height [mV] | Area [%] | Height [%] | W05 [min] | Compound Name |
|---|-------------------|-------------|-------------|----------|------------|-----------|---------------|
| 1 | 9.057             | 2555.751    | 39.823      | 51.8     | 19.7       | 1.16      |               |
| 2 | 11.547            | 2379.687    | 162.712     | 48.2     | 80.3       | 0.22      |               |
|   | Total             | 4935.438    | 202.535     | 100.0    | 100.0      |           |               |

HPLC after ATH of (2-methoxyphenyl)(4-(4,4,5,5-tetramethyl-1,3,2-dioxaborolan-2-yl)phenyl)methanone using (*R,R*)-3C-Tethered Ru(II)-TsDPEN catalyst **2** (after 72 hours, 100% conversion, 55% ee).

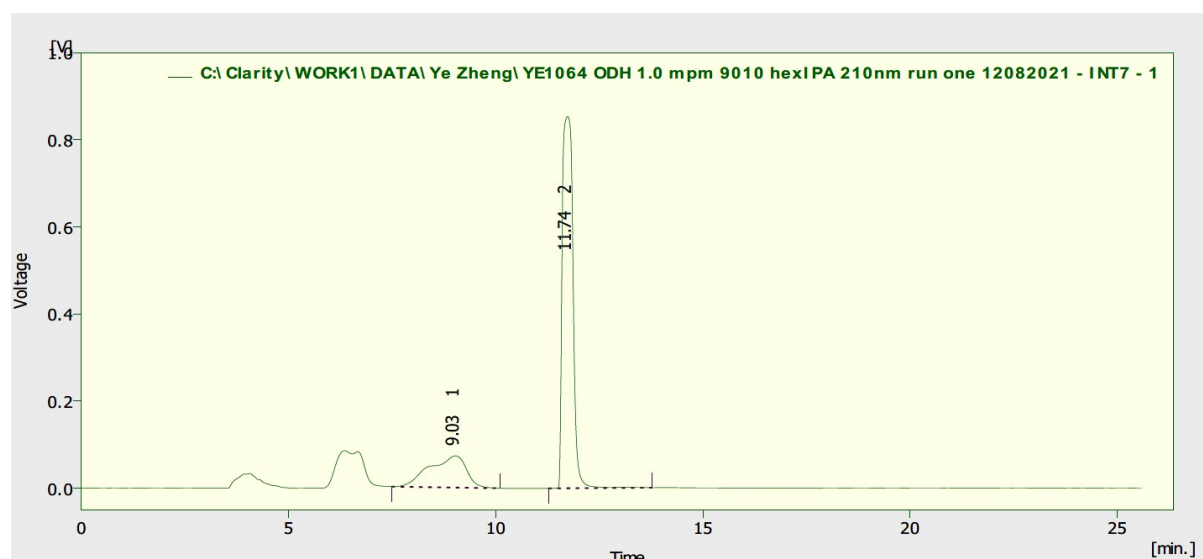

Result Table (Uncal - C:\Clarity\WORK1\DATA\Ye Zheng\YE1064 ODH 1.0 mpm 9010 hexIPA 210nm run one 12082021 - INT7 - 1)

|   | Reten. Time<br>[min] | Area<br>[mV.s] | Height<br>[mV] | Area<br>[%] | Height<br>[%] | W05<br>[min] | Compound<br>Name |
|---|----------------------|----------------|----------------|-------------|---------------|--------------|------------------|
| 1 | 9.030                | 4519.241       | 72.936         | 22.7        | 7.9           | 1.12         |                  |
| 2 | 11.737               | 15346.803      | 853.846        | 77.3        | 92.1          | 0.29         |                  |
|   | Total                | 19866.043      | 926.782        | 100.0       | 100.0         |              |                  |

(4-Bromophenyl)(4-methoxyphenyl)methanone.

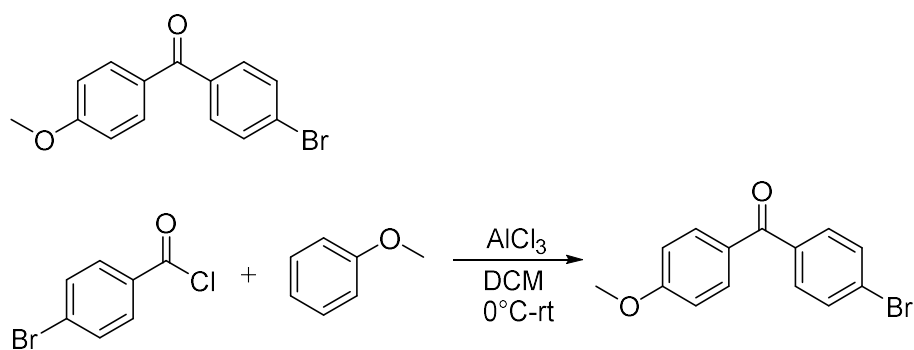

This compound has been reported and fully characterized: L. Dong, G.-R. Chen, X.-P. HeS. Vidal, *Org. Biomol. Chem.* 2019, **17**, 9251-9256.

To a solution of 4-bromobenzoyl chloride (250 mg, 1.14 mmol) was in DCM (5 mL) at 0 °C was added dropwise anisole (155 mg, 1.43 mmol) and AlCl<sub>3</sub> (190 mg, 1.43 mmol). The reaction mixture was warmed to rt and left stirring under the nitrogen atmosphere for 2 hours, followed by TLC (9:1 hexane: EtOAc). The mixture was poured into ice water, quenched with 2M HCl solution (20 mL). EtOAc (20 mL) was added and the organic layer was separated. The aqueous layer was extracted with EtOAc (3 × 20 mL), and the combined organic layers were dried (MgSO<sub>4</sub>) and filtered. Solvent was removed to give the crude product. The product was isolated via flash chromatography on silica eluted with 0-20% ethyl acetate in hexane to give (4-bromophenyl)(4-methoxyphenyl)methanone as a white solid (226 mg, 0.780 mmol, 68%). TLC: R<sub>f</sub> ca 0.20 (9:1 hexane: EtOAc), strong UV and KMnO<sub>4</sub>; δ<sub>H</sub> (400 MHz, CDCl<sub>3</sub>) 7.80 (2H, d, *J* = 8.8, ArH), 7.64-7.60 (4H, m, ArH), 6.98 (2H, d, *J* = 8.8, ArH), 3.89 (3H, s, CH<sub>3</sub>) ppm; δ<sub>C</sub> (100 MHz, CDCl<sub>3</sub>) 194.41 (C), 163.44 (C), 137.03 (C), 132.48 (CH), 131.51 (CH), 131.29 (CH), 129.75 (C), 126.84 (C), 113.71 (CH), 55.55 (CH<sub>3</sub>) ppm; *m/z* (ES-API+) 331.0 (M<sup>+</sup> + 23, 100%). Data matched that reported.

$^1\text{H}$  NMR (400 MHz,  $\text{CDCl}_3$ )

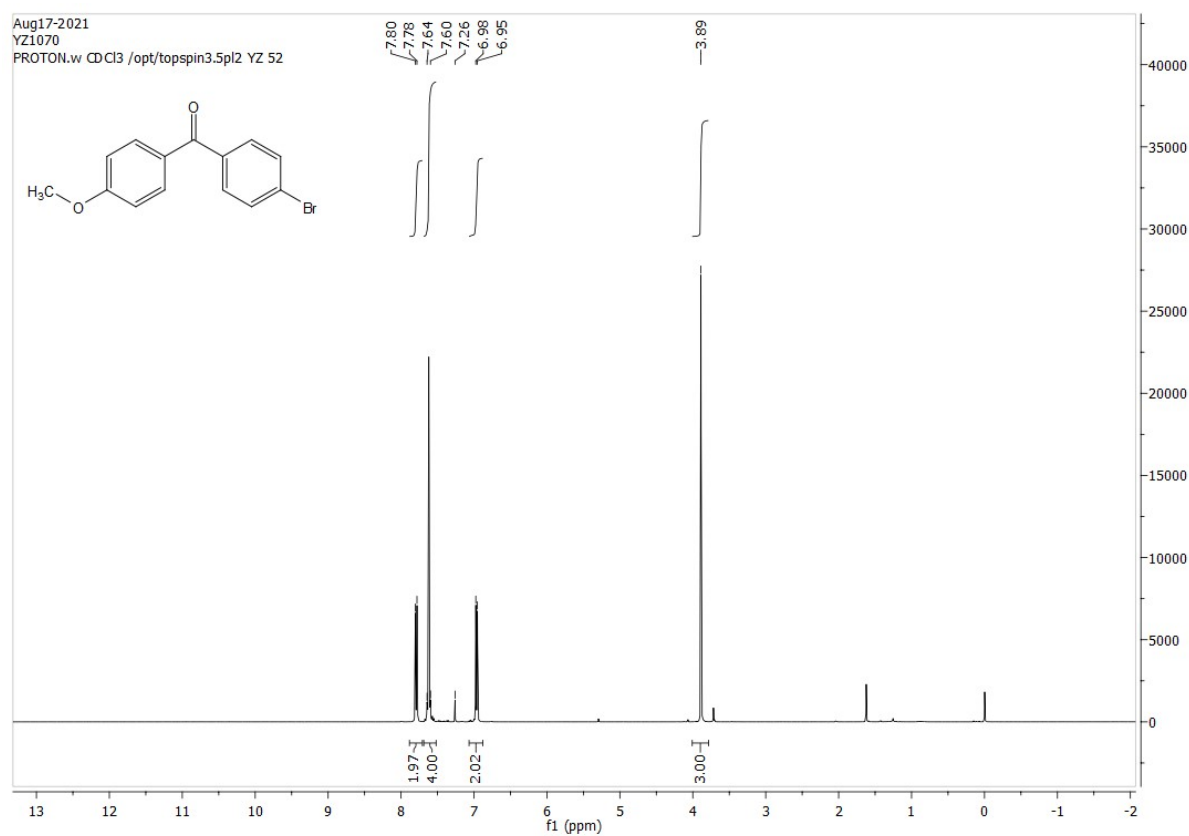

$^{13}\text{C}$  NMR (100 MHz,  $\text{CDCl}_3$ )

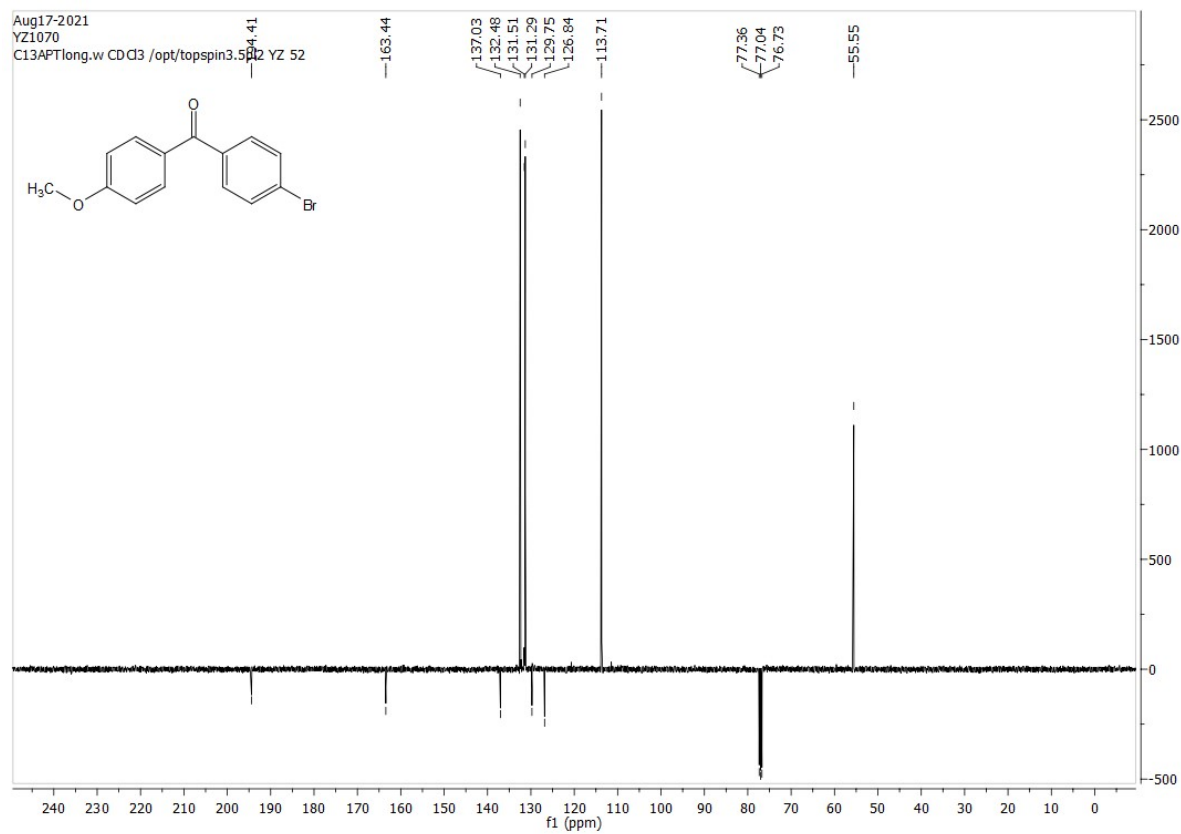

(4-Methoxyphenyl)(4-(4,4,5,5-tetramethyl-1,3,2-dioxaborolan-2-yl)phenyl)methanone.

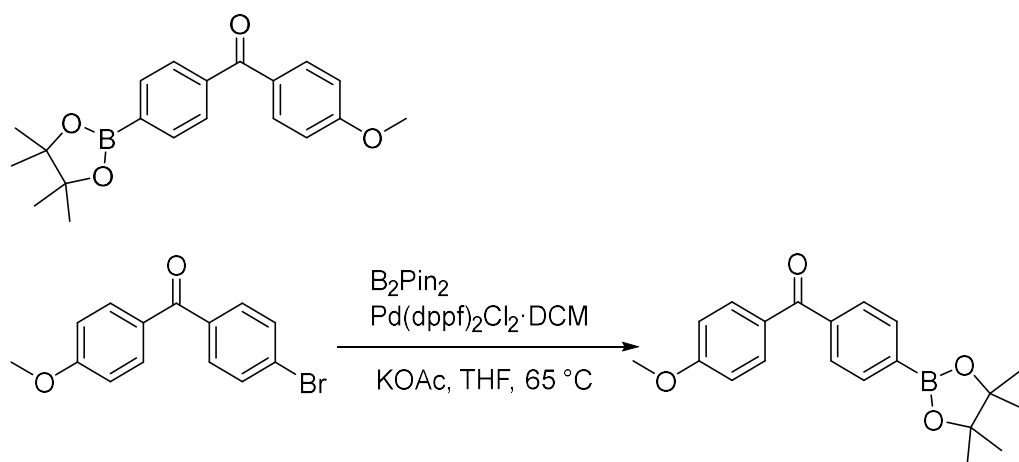

This compound is novel.

A round-bottom flask was charged with (4-bromophenyl)(4-methoxyphenyl)methanone (1.44 g, 4.97 mmol), bis(pinacolato)diboron (1.51 g, 5.96 mmol), potassium acetate (1.46 g, 14.9 mmol), THF (25 mL) and  $Pd(dppf)_2Cl_2 \cdot DCM$  (203 mg, 0.249 mmol). The reaction mixture was heated to 65 °C and left stirring under the nitrogen atmosphere overnight, followed by TLC (9:1 hexane: EtOAc). The mixture was quenched by distilled water (20 mL). EtOAc (20 mL) was added and the organic layer was separated. The aqueous layer was extracted with EtOAc (3 × 20 mL), and the combined organic layers were dried ( $MgSO_4$ ) and filtered. Solvent was removed to give the crude product. The product was isolated via flash chromatography on silica eluted with 0-20% ethyl acetate in hexane to give (4-methoxyphenyl)(4-(4,4,5,5-tetramethyl-1,3,2-dioxaborolan-2-yl)phenyl)methanone as a white solid (1.43 g, 4.23 mmol, 85%). TLC:  $R_f$  ca 0.40 (9:1 hexane: EtOAc), strong UV and  $KMnO_4$ ; Mp: 88°C; HRMS: (found (ESI<sup>+</sup>):  $[M+H]^+$ , Calcd for  $C_{20}H_{23}BNaO_4$  361.1584; Found 361.1582; 0.4 ppm error;  $\nu_{max}$  2976, 2931, 1649, 1597, 1504, 1396, 1255, 1123, 1085, 927, 821  $cm^{-1}$ ;  $\delta_H$  (500 MHz,  $CDCl_3$ ) 7.92 (2H, d,  $J = 7.9$ , ArH), 7.83 (2H, d,  $J = 8.8$ , ArH), 7.73 (2H, d,  $J = 7.9$ , ArH), 6.96 (2H, d,  $J = 8.8$ , ArH), 3.88 (3H, s,  $OCH_3$ ), 1.37 (12H, s,  $CH_3$ ) ppm;  $\delta_C$  (125 MHz,  $CDCl_3$ ) 195.73 (C), 163.32 (C), 140.53 (C), 134.51 (CH), 132.61 (CH), 130.10 (C), 128.72 (CH), 113.59 (CH), 84.17 (C), 55.51 ( $CH_3$ ), 24.90 ( $CH_3$ ) ppm;  $m/z$  (ES-API<sup>+</sup>) 361.1 ( $M^+ + 23$ , 100%).

Enantiomeric excess and conversion determined by HPLC analysis (Chiralpak IG, 30 cm x 6mm column, hexane:iPrOH 95:5, 0.5 mL/min, T = 25°C) ketone 35.0 min, *R* and *S* isomers 48.3 min and 52.5 min.



$^1\text{H}$  NMR (500 MHz,  $\text{CDCl}_3$ )

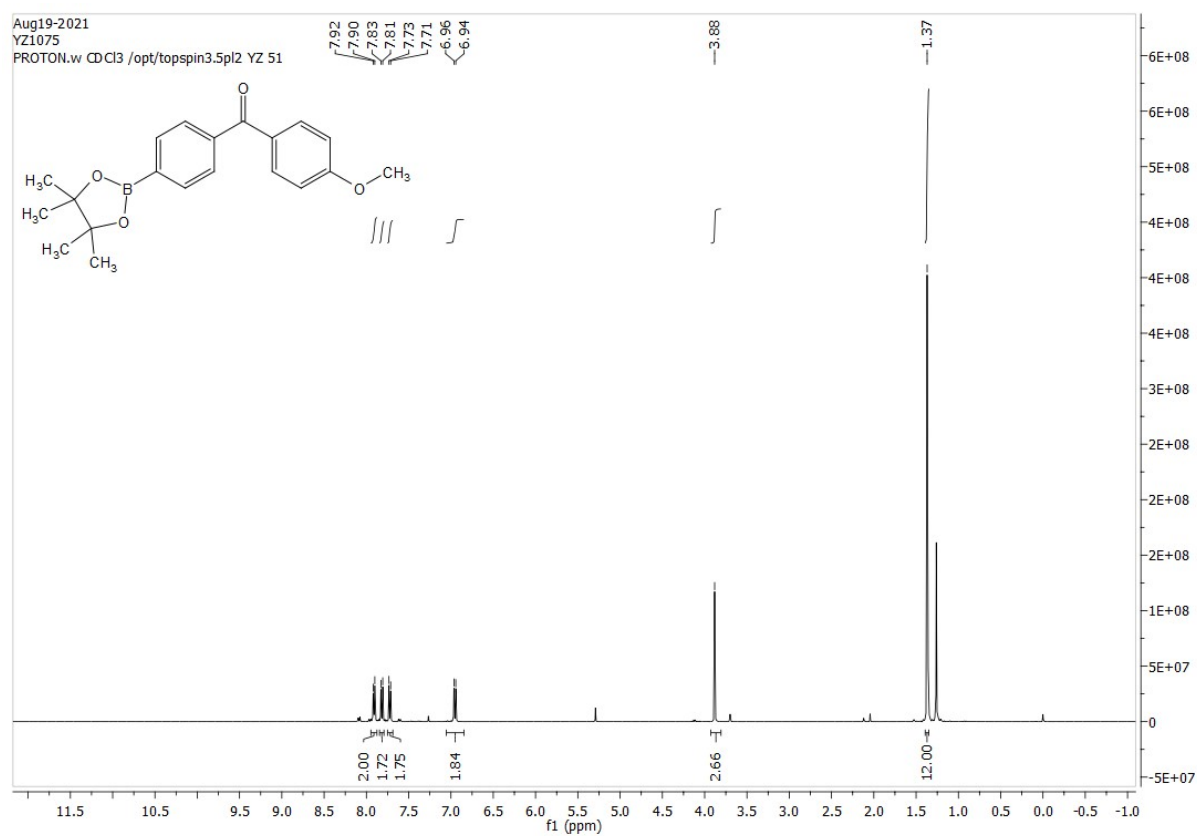

$^{13}\text{C}$  NMR (125 MHz,  $\text{CDCl}_3$ )

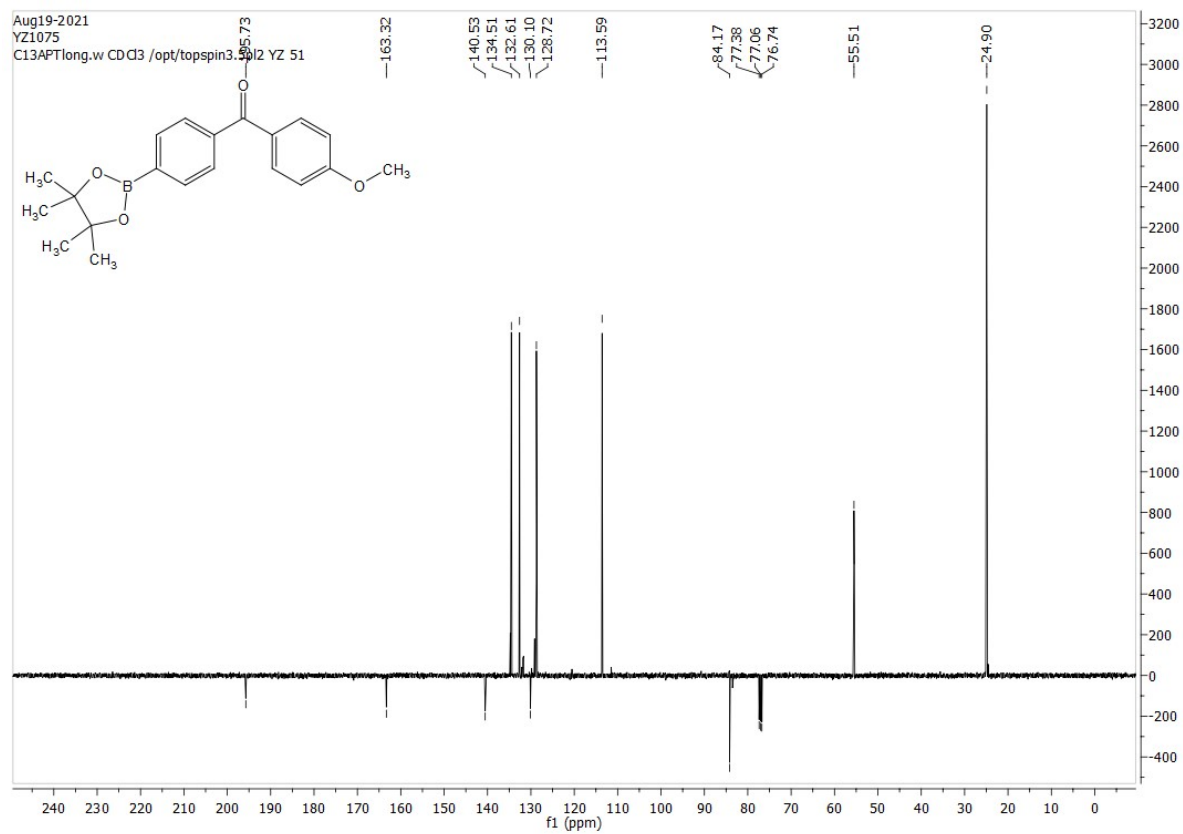

# COSY (500 MHz, CDCl<sub>3</sub>)

YZ1075  
COSY.w CDCl<sub>3</sub> /opt/topspin3.5pl2 YZ 51

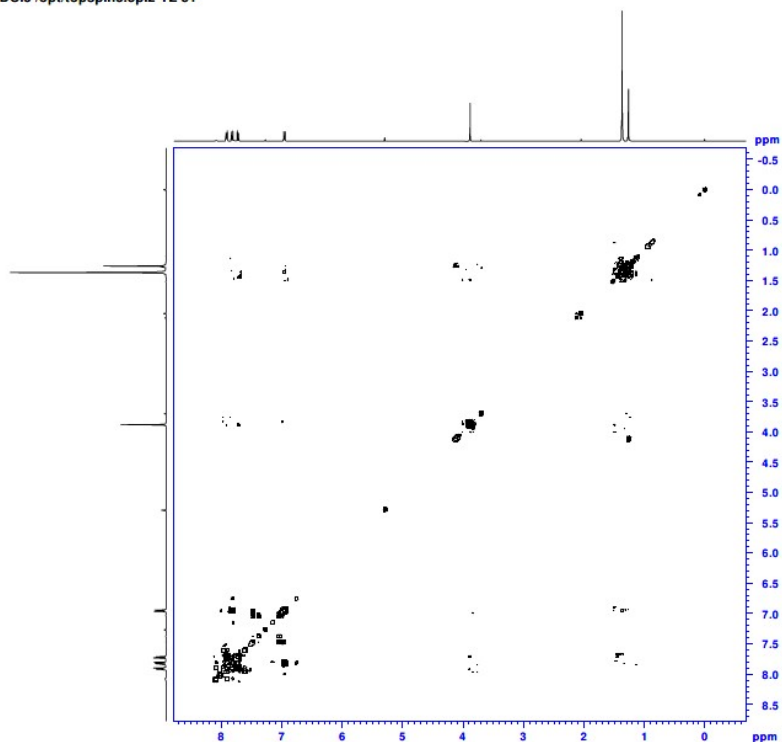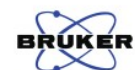

Current Data Parameters  
NAME Aug19-2021  
EXPNO 1  
PROCNO 1

F2 - Acquisition Parameters  
Date\_ 20210919  
Time 8.50 h  
INSTRUM spect  
PROBHD 1HDELTA\_5044  
PULPROG zgpg30  
TD 65536  
SOLVENT CDCl<sub>3</sub>  
NS 16  
DS 4  
FIDRES 3781.819 Hz  
AQ 0.2703160 sec  
RG 384  
SW 132.200 MHz  
DE 4.50 dB  
TE 300.2 K  
D0 0.00000000 sec  
D1 1.20000000 sec  
D11 0.03000000 sec  
D12 0.00000000 sec  
D13 0.00000000 sec  
D14 0.00000000 sec  
D15 0.00000000 sec  
D16 0.00000000 sec  
D17 0.00000000 sec  
TDav 400.1316268 MHz  
NUC1 1H  
P1 14.00 usec  
P2 14.00 usec  
P3 14.00 usec  
P4 14.00 usec  
P5 14.00 usec  
P6 14.00 usec  
P7 14.00 usec  
P8 14.00 usec  
P9 14.00 usec  
P10 14.00 usec  
P11 14.00 usec  
P12 14.00 usec  
P13 14.00 usec  
P14 14.00 usec  
P15 14.00 usec  
P16 14.00 usec

F1 - Acquisition parameters  
TD 65536  
SOLVENT CDCl<sub>3</sub>  
NS 16  
DS 4  
FIDRES 3781.819 Hz  
AQ 0.2703160 sec  
RG 384  
SW 132.200 MHz  
DE 4.50 dB  
TE 300.2 K  
D0 0.00000000 sec  
D1 1.20000000 sec  
D11 0.03000000 sec  
D12 0.00000000 sec  
D13 0.00000000 sec  
D14 0.00000000 sec  
D15 0.00000000 sec  
D16 0.00000000 sec  
D17 0.00000000 sec  
TDav 400.1316268 MHz  
NUC1 1H  
P1 14.00 usec  
P2 14.00 usec  
P3 14.00 usec  
P4 14.00 usec  
P5 14.00 usec  
P6 14.00 usec  
P7 14.00 usec  
P8 14.00 usec  
P9 14.00 usec  
P10 14.00 usec  
P11 14.00 usec  
P12 14.00 usec  
P13 14.00 usec  
P14 14.00 usec  
P15 14.00 usec  
P16 14.00 usec

F2 - Processing parameters  
SI 32768  
SF 400.1300000 MHz  
WDW EM  
SSB 0  
LB 0 Hz  
GB 0  
PC 1.40

F1 - Processing parameters  
SI 32768  
SF 400.1300000 MHz  
WDW EM  
SSB 0  
LB 0 Hz  
GB 0  
PC 1.40

# HSQC (500 MHz, CDCl<sub>3</sub>)

YZ1075  
HSQC.w CDCl<sub>3</sub> /opt/topspin3.5pl2 YZ 51

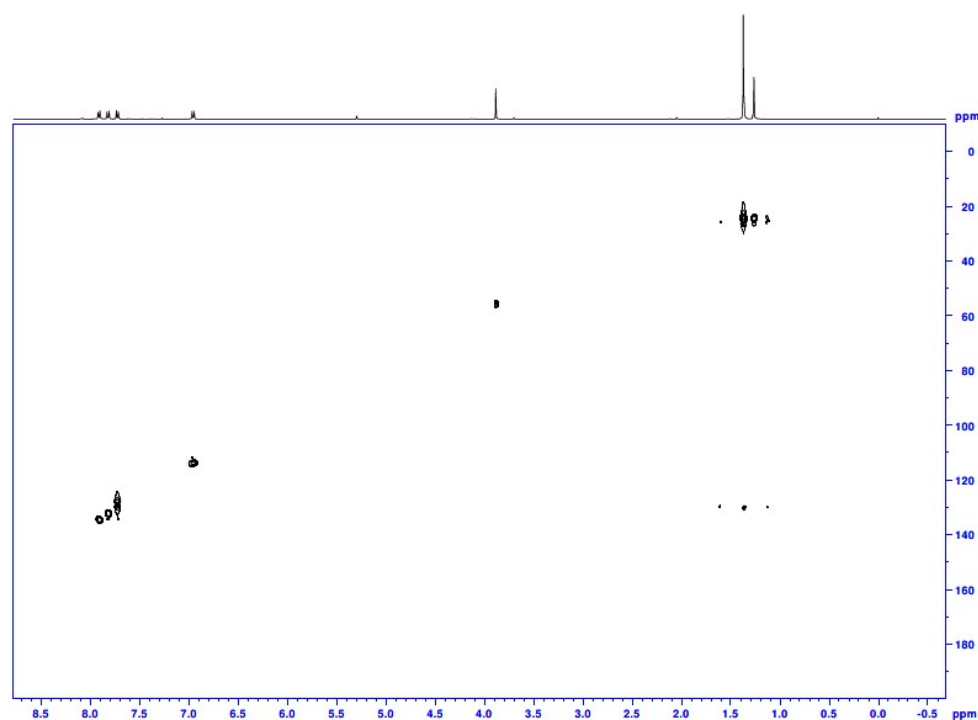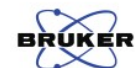

Current Data Parameters  
NAME Aug19-2021  
EXPNO 1  
PROCNO 1

F2 - Acquisition Parameters  
Date\_ 20210919  
Time 8.54 h  
INSTRUM spect  
PROBHD 1HDELTA\_5044  
PULPROG zgpg30  
TD 65536  
SOLVENT CDCl<sub>3</sub>  
NS 16  
DS 4  
FIDRES 3781.819 Hz  
AQ 0.2703160 sec  
RG 384  
SW 132.200 MHz  
DE 4.50 dB  
TE 300.2 K  
D0 0.00000000 sec  
D1 1.20000000 sec  
D11 0.03000000 sec  
D12 0.00000000 sec  
D13 0.00000000 sec  
D14 0.00000000 sec  
D15 0.00000000 sec  
D16 0.00000000 sec  
D17 0.00000000 sec  
TDav 400.1316268 MHz  
NUC1 1H  
P1 14.00 usec  
P2 14.00 usec  
P3 14.00 usec  
P4 14.00 usec  
P5 14.00 usec  
P6 14.00 usec  
P7 14.00 usec  
P8 14.00 usec  
P9 14.00 usec  
P10 14.00 usec  
P11 14.00 usec  
P12 14.00 usec  
P13 14.00 usec  
P14 14.00 usec  
P15 14.00 usec  
P16 14.00 usec

F1 - Acquisition parameters  
TD 65536  
SOLVENT CDCl<sub>3</sub>  
NS 16  
DS 4  
FIDRES 3781.819 Hz  
AQ 0.2703160 sec  
RG 384  
SW 132.200 MHz  
DE 4.50 dB  
TE 300.2 K  
D0 0.00000000 sec  
D1 1.20000000 sec  
D11 0.03000000 sec  
D12 0.00000000 sec  
D13 0.00000000 sec  
D14 0.00000000 sec  
D15 0.00000000 sec  
D16 0.00000000 sec  
D17 0.00000000 sec  
TDav 400.1316268 MHz  
NUC1 1H  
P1 14.00 usec  
P2 14.00 usec  
P3 14.00 usec  
P4 14.00 usec  
P5 14.00 usec  
P6 14.00 usec  
P7 14.00 usec  
P8 14.00 usec  
P9 14.00 usec  
P10 14.00 usec  
P11 14.00 usec  
P12 14.00 usec  
P13 14.00 usec  
P14 14.00 usec  
P15 14.00 usec  
P16 14.00 usec

F2 - Processing parameters  
SI 32768  
SF 400.1300000 MHz  
WDW EM  
SSB 0  
LB 0 Hz  
GB 0  
PC 1.40

F1 - Processing parameters  
SI 32768  
SF 400.1300000 MHz  
WDW EM  
SSB 0  
LB 0 Hz  
GB 0  
PC 1.40

# HMBC (500 MHz, CDCl<sub>3</sub>)

YZ1075  
HMBC.w CDCl<sub>3</sub>/opt/topspin3.5pl2 YZ 51

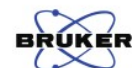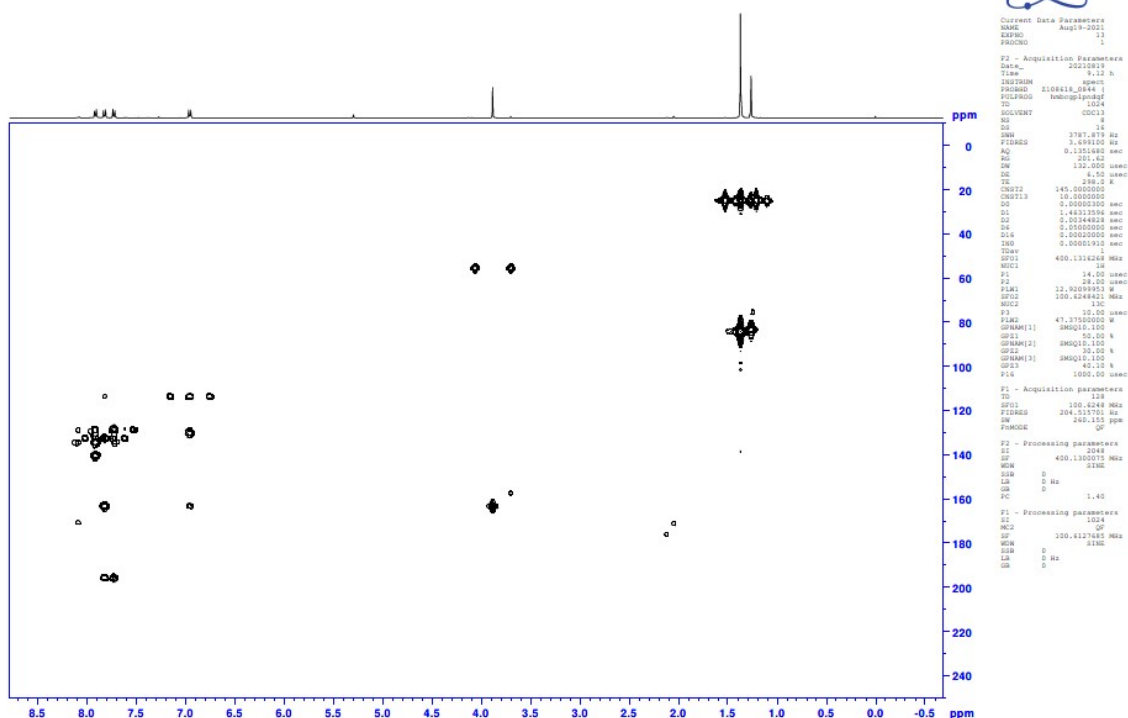

## HPLC of (4-methoxyphenyl)(4-(4,4,5,5-tetramethyl-1,3,2-dioxaborolan-2-yl)phenyl)methanone

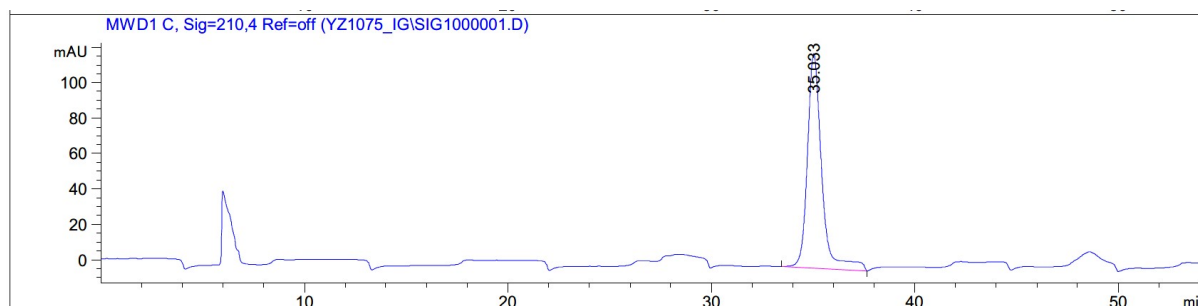

Signal 2: MWD1 C, Sig=210,4 Ref=off

| Peak # | RetTime [min] | Type | Width [min] | Area [mAU*s] | Height [mAU] | Area %   |
|--------|---------------|------|-------------|--------------|--------------|----------|
| 1      | 35.033        | BB   | 0.7380      | 5954.32764   | 121.02700    | 100.0000 |

Totals : 5954.32764 121.02700

(4-Methoxyphenyl)(4-(4,4,5,5-tetramethyl-1,3,2-dioxaborolan-2-yl)phenyl)methanol

**24.**

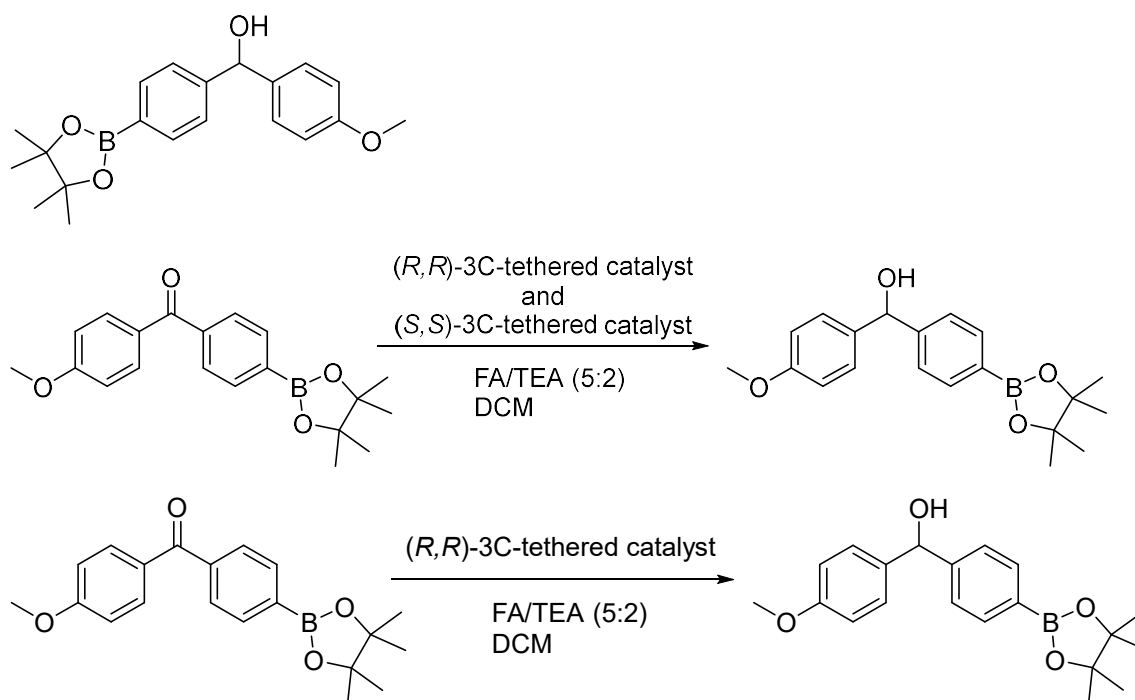

This compound is novel.

**Synthesis of a racemic standard:**

(R,R)-3C-Tethered Ru(II)-TsDPEN catalyst (0.74 mg, 1.2  $\mu$ mol, 0.5 mol%) and (S,S)-3C-tethered Ru(II)-TsDPEN catalyst (0.74 mg, 1.2  $\mu$ mol, 0.5 mol%) were added to FA: TEA (5:2 azeotropic mixture, 0.36 mL) at rt and the mixture was stirred under a nitrogen atmosphere for 15 minutes; after which a solution of (4-methoxyphenyl)(4-(4,4,5,5-tetramethyl-1,3,2-dioxaborolan-2-yl)phenyl)methanone (80.0 mg, 0.237 mmol) in DCM (0.50 mL) was added. The reaction mixture was stirred under a nitrogen atmosphere and followed by TLC (4:1 hexane: EtOAc). After 72 hours, the reaction was quenched using saturated NaHCO<sub>3</sub> solution (20 mL). EtOAc (20 mL) was added and the organic layer was separated. The aqueous layer was extracted with EtOAc (3 x 20 mL) and the combined organic layers were dried (MgSO<sub>4</sub>) and filtered. The solvent was removed to give the crude product. The product was isolated via flash chromatography on silica eluted with 0-50% EtOAc in hexane to give (4-methoxyphenyl)(4-(4,4,5,5-tetramethyl-1,3,2-dioxaborolan-2-yl)phenyl)methanol **24** as a colorless oil (41.5 mg, 0.122 mmol, 52%). TLC: R<sub>f</sub> ca 0.40 (4:1 hexane: EtOAc), strong UV and KMnO<sub>4</sub>; HRMS: (found (ESI<sup>+</sup>): [M+H]<sup>+</sup>, Calcd for C<sub>20</sub>H<sub>25</sub>BNaO<sub>4</sub> 363.1738; Found 363.1738; 1.0 ppm error;  $\nu_{\text{max}}$  3451 (br), 2977, 2933, 2836, 1611,

1510, 1397, 1318, 1245, 1169, 1141, 1085, 961  $\text{cm}^{-1}$ ;  $\delta_{\text{H}}$  (400 MHz,  $\text{CDCl}_3$ ) 7.79 (2H, d,  $J = 7.9$ , ArH), 7.39 (2H, d,  $J = 7.9$ , ArH), 7.26-7.24 (2H, m, ArH), 6.85 (2H, d,  $J = 8.6$ , ArH), 5.81 (1H, d,  $J = 3.5$ , ArCH), 3.78 (3H, s,  $\text{OCH}_3$ ), 2.21 (1H, d,  $J = 3.5$ , OH), 1.33 (12H, s,  $\text{CH}_3$ ) ppm;  $\delta_{\text{C}}$  (100 MHz,  $\text{CDCl}_3$ ) 159.11 (C), 147.05 (C), 136.06 (C), 134.96 (CH), 128.04 (CH), 125.64 (CH), 113.92 (CH), 83.78 (C), 75.83 (CH), 55.29 ( $\text{CH}_3$ ), 24.86 ( $\text{CH}_3$ ) ppm;  $m/z$  (ES-API+) 363.2 ( $\text{M}^+ + 23$ , 100%).

Enantiomeric excess and conversion determined by HPLC analysis (Chiralpak IG, 30 cm x 6mm column, hexane:iPrOH 95:5, 0.5 mL/min,  $T = 25^\circ\text{C}$ ) ketone 35.0 min, *R* and *S* isomers 48.3 min and 52.5 min, configuration is not confirmed.

ATH of (4-methoxyphenyl)(4-(4,4,5,5-tetramethyl-1,3,2-dioxaborolan-2-yl)phenyl)methanone using (*R,R*)-3C-tethered Ru(II)-TsDPEN catalyst **2** (1.5 mg, 2.4  $\mu\text{mol}$ , 1 mol%) was added to FA: TEA (5:2 azeotropic mixture, 0.36 mL) at rt and the mixture was stirred under a nitrogen atmosphere for 15 minutes; after which a solution of (4-methoxyphenyl)(4-(4,4,5,5-tetramethyl-1,3,2-dioxaborolan-2-yl)phenyl)methanone (80.0 mg, 0.237 mmol) in DCM (0.50 mL) was added. The reaction mixture was stirred under a nitrogen atmosphere and followed by TLC (4:1 hexane: EtOAc). After 72 hours, the reaction was quenched using saturated  $\text{NaHCO}_3$  solution (20 mL). EtOAc (20 mL) was added and the organic layer was separated. The aqueous layer was extracted with EtOAc (3 x 20 mL) and the combined organic layers were dried ( $\text{MgSO}_4$ ) and filtered. The solvent was removed to give the crude product. The product was isolated via flash chromatography on silica eluted with 0-50% EtOAc in hexane to give (4-methoxyphenyl)(4-(4,4,5,5-tetramethyl-1,3,2-dioxaborolan-2-yl)phenyl)methanol **24** as a colorless oil (42.5 mg, 0.125 mmol, 53%). The reaction was also followed by HPLC (Chiralpak IG, 30 cm x 6mm column, hexane:iPrOH 95:5, 0.5 mL/min,  $T = 25^\circ\text{C}$ ):  $[\alpha]_{\text{D}}^{26} -2.35$  (c 0.680 in  $\text{CHCl}_3$ ) 20% ee.

<sup>1</sup>H NMR (400 MHz, CDCl<sub>3</sub>)

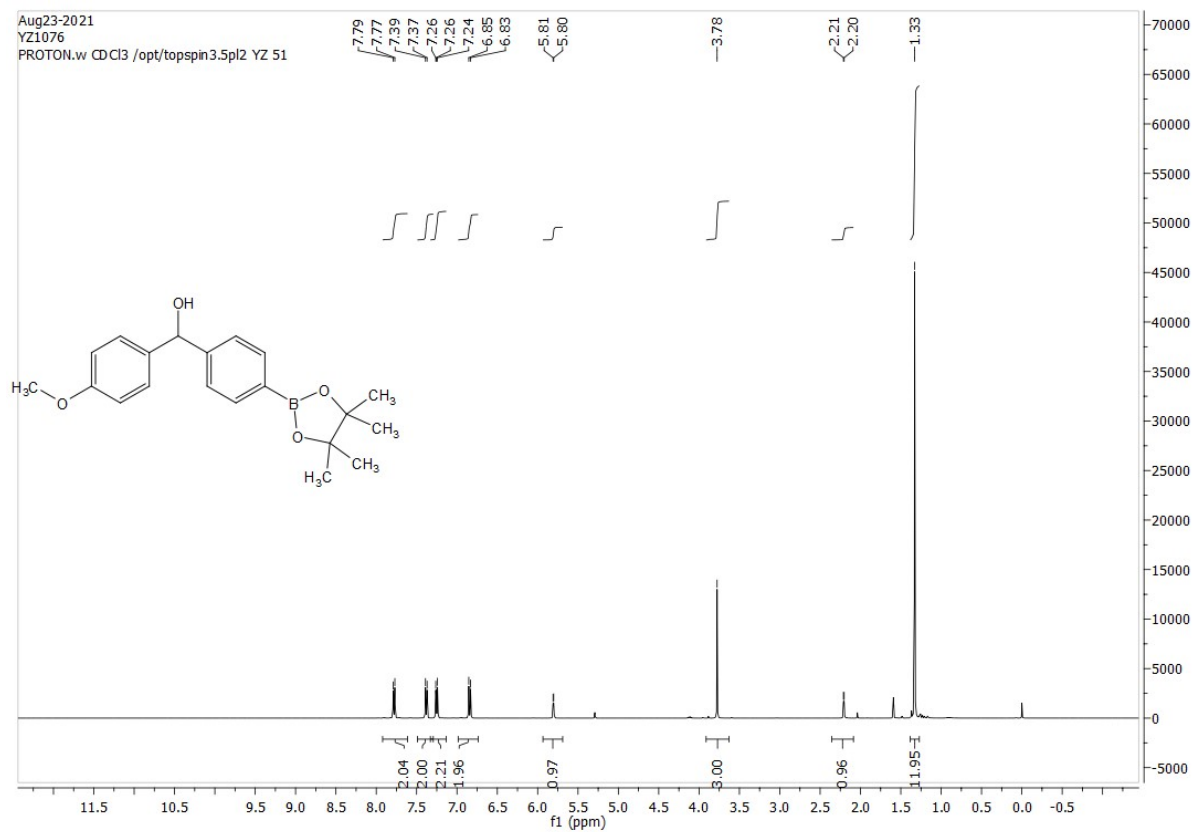

<sup>13</sup>C NMR (100 MHz, CDCl<sub>3</sub>)

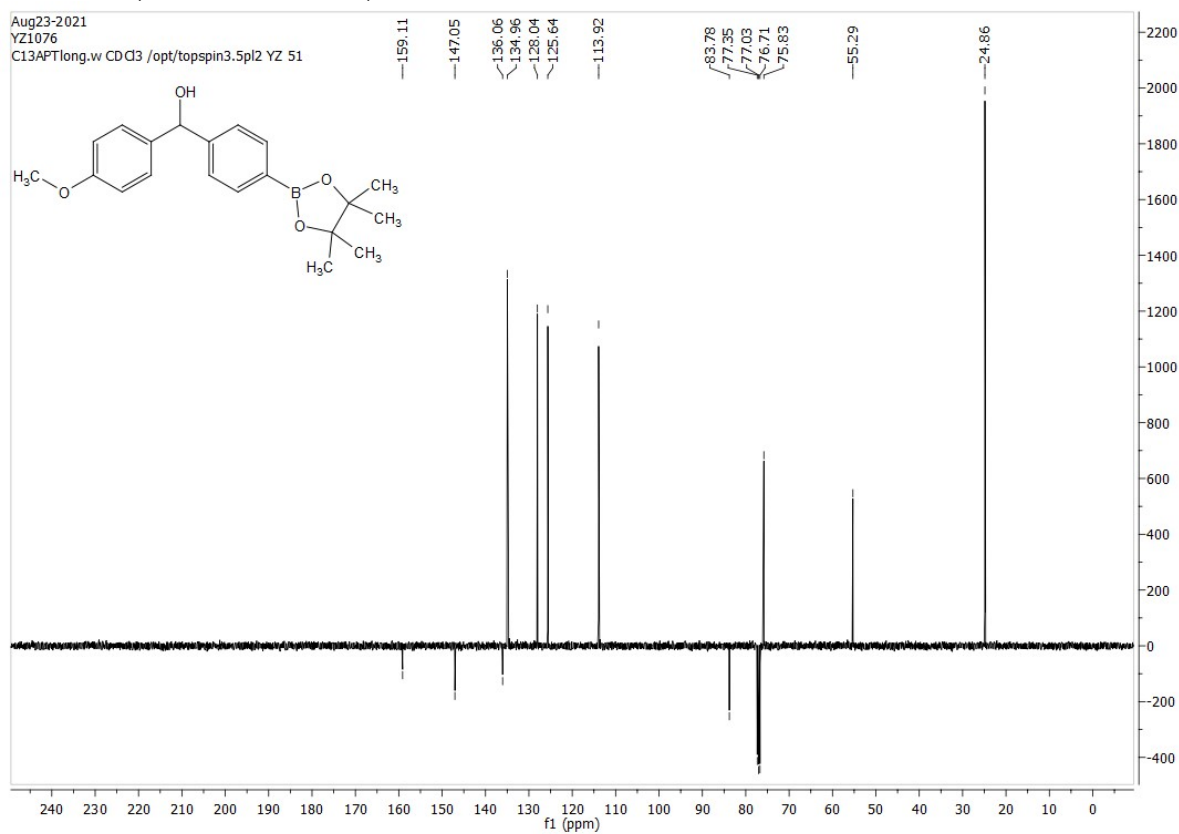

## COSY (400 MHz, CDCl<sub>3</sub>)

YZ1076  
COSY.w CDCl<sub>3</sub> /opt/topspin3.5pl2 YZ 51

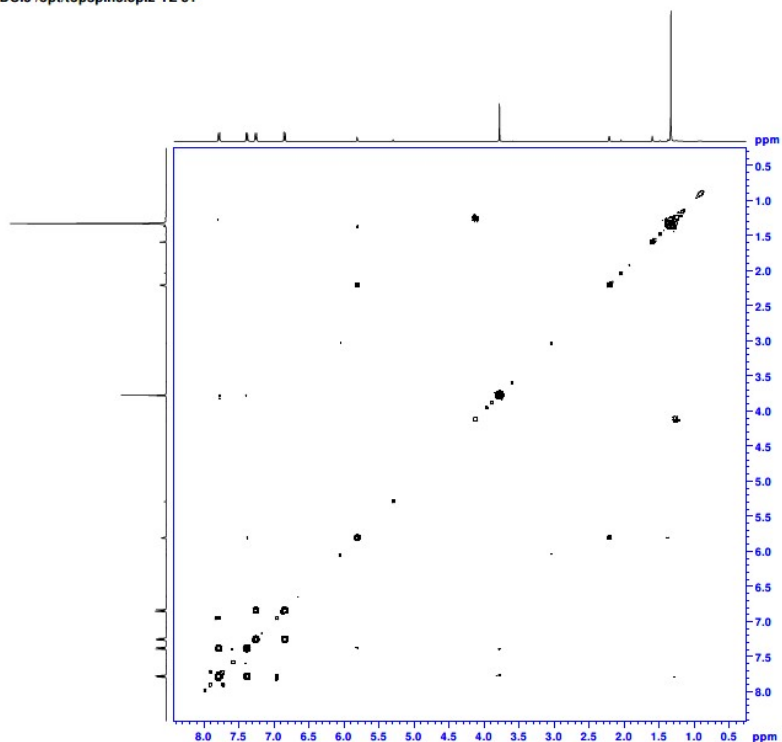

Current Data Parameters  
NAME Aug13-2021  
EXPNO 11  
PROCNO 1

F2 - Acquisition Parameters  
Date\_ 20210923  
Time 8.38 h  
INSTRUM spect  
PROBHD 1HDELTA\_5044  
PULPROG zgpg30  
TD 65536  
SOLVENT CDCl<sub>3</sub>  
NS 16  
DS 4  
SWH 3201.974 Hz  
FIDRES 0.1513440 Hz  
AQ 0.3113440 sec  
RG 64.18  
SQ 157.000 usec  
DE 6.50 usec  
TE 300.2 K  
D0 0.00000000 sec  
D1 1.80000000 sec  
D11 0.03000000 sec  
D12 0.00000000 sec  
D13 0.00000000 sec  
D14 0.00000000 sec  
D15 0.00000000 sec  
TAcq 400.1317479 MHz  
NUC1 1H  
P1 14.00 usec  
P2 14.00 usec  
P3 250.00 usec  
PL1 12.92099953 dB  
PL12 2.81399953 dB  
GPRAM[1] SMOUL1.100  
GPR2 10.00 dB  
P16 1000.00 usec

F1 - Acquisition parameters  
SI 32768  
SF 400.1317171 MHz  
FIDRES 0.1513440 Hz  
SW 6.167 ppm  
FWDRES 0.0

F2 - Processing parameters  
SI 32768  
SF 400.1301222 MHz  
WDW 0  
SSB 0  
LB 0 Hz  
GB 0  
PC 1.40

F1 - Processing parameters  
SI 32768  
SF 400.1301222 MHz  
WDW 0  
SSB 0  
LB 0 Hz  
GB 0  
PC 1.40

## HSQC (400 MHz, CDCl<sub>3</sub>)

YZ1076  
HSQC.w CDCl<sub>3</sub> /opt/topspin3.5pl2 YZ 51

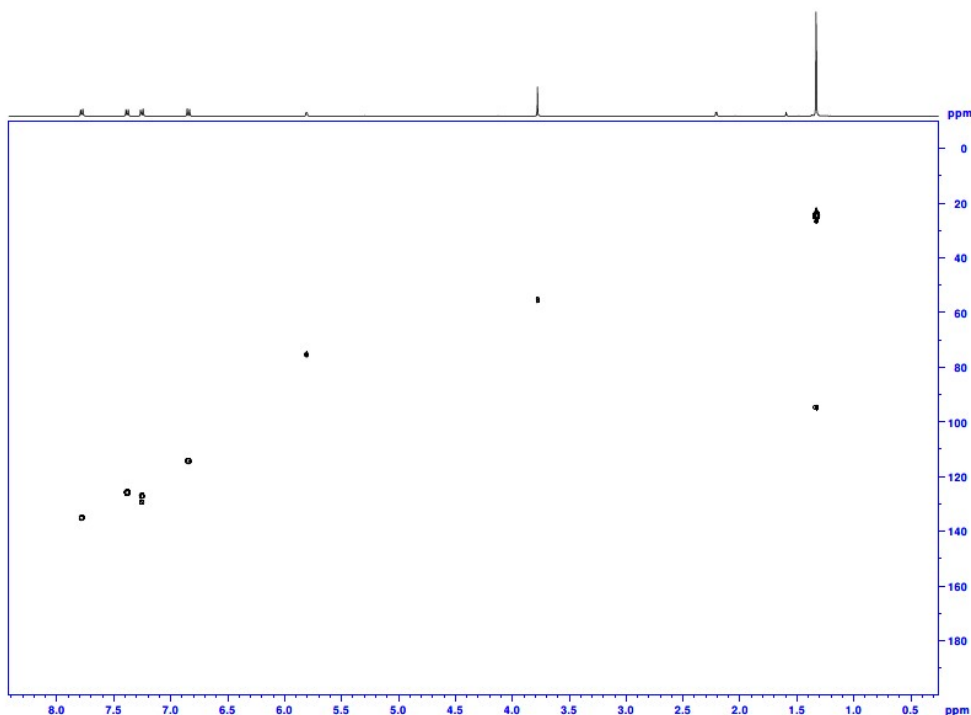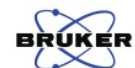

Current Data Parameters  
NAME Aug13-2021  
EXPNO 11  
PROCNO 1

F2 - Acquisition Parameters  
Date\_ 20210923  
Time 8.44 h  
INSTRUM spect  
PROBHD 1HDELTA\_5044  
PULPROG zgpg30  
TD 65536  
SOLVENT CDCl<sub>3</sub>  
NS 16  
DS 4  
SWH 3201.974 Hz  
FIDRES 0.1513440 Hz  
AQ 0.3113440 sec  
RG 64.18  
SQ 157.000 usec  
DE 6.50 usec  
TE 300.2 K  
D0 0.00000000 sec  
D1 1.80000000 sec  
D11 0.03000000 sec  
D12 0.00000000 sec  
D13 0.00000000 sec  
D14 0.00000000 sec  
D15 0.00000000 sec  
TAcq 400.1317479 MHz  
NUC1 1H  
P1 14.00 usec  
P2 14.00 usec  
P3 250.00 usec  
PL1 12.92099953 dB  
PL12 2.81399953 dB  
GPRAM[1] SMOUL1.100  
GPR2 10.00 dB  
P16 1000.00 usec

F1 - Acquisition parameters  
SI 32768  
SF 400.1301222 MHz  
WDW 0  
SSB 0  
LB 0 Hz  
GB 0  
PC 1.40

F2 - Processing parameters  
SI 32768  
SF 400.1301222 MHz  
WDW 0  
SSB 0  
LB 0 Hz  
GB 0  
PC 1.40

F1 - Processing parameters  
SI 32768  
SF 400.1301222 MHz  
WDW 0  
SSB 0  
LB 0 Hz  
GB 0  
PC 1.40

# HMBC (400 MHz, CDCl<sub>3</sub>)

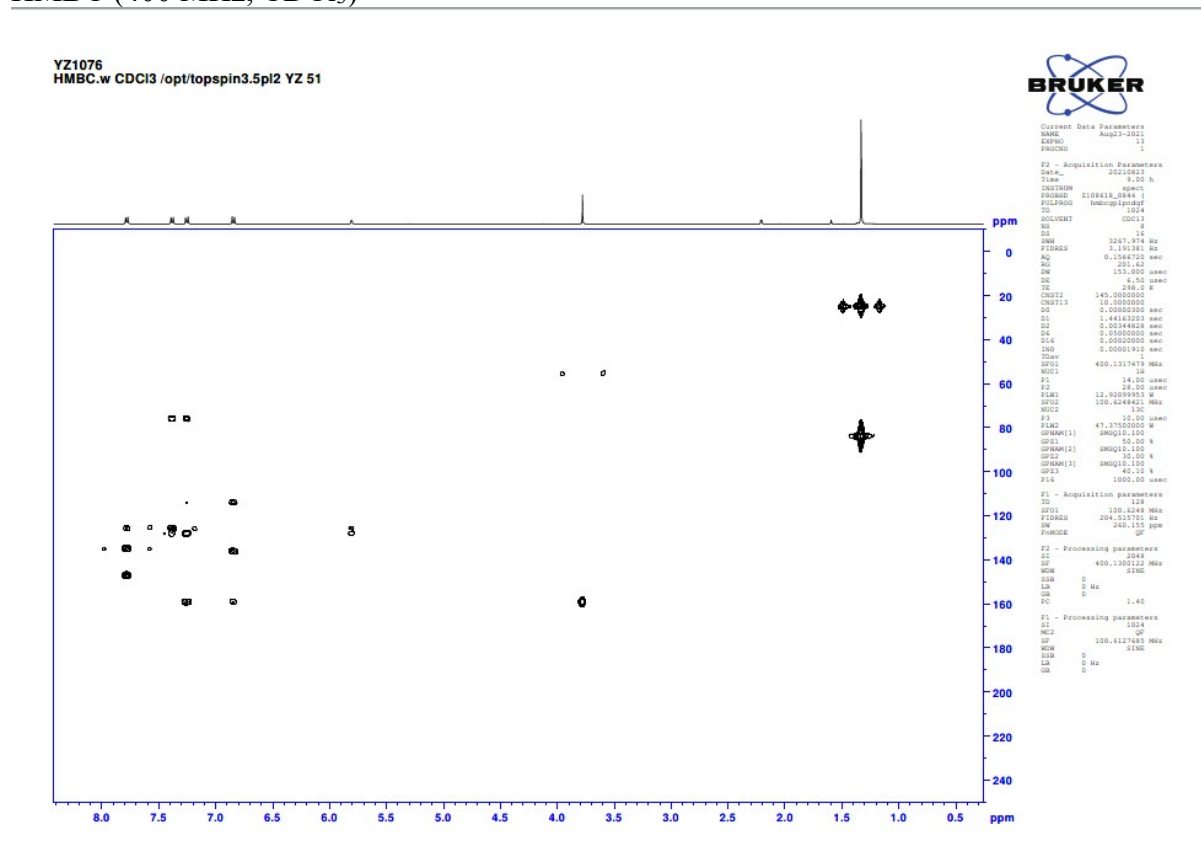

## HPLC of racemic (4-methoxyphenyl)(4-(4,4,5,5-tetramethyl-1,3,2-dioxaborolan-2-yl)phenyl)methanol **24**.

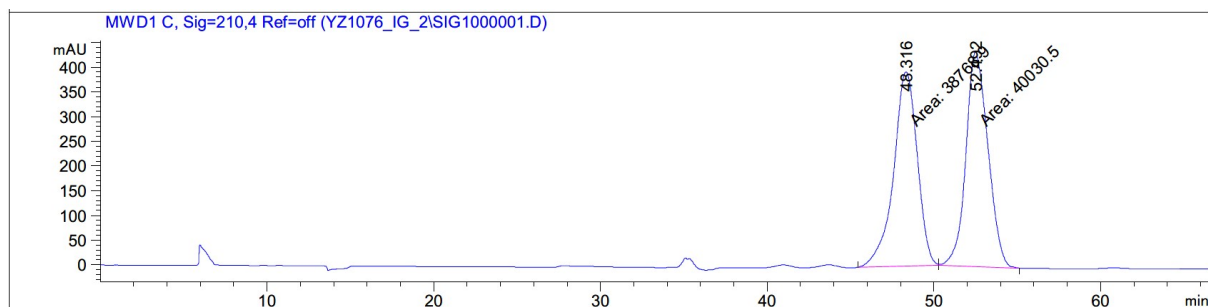

Signal 2: MWD1 C, Sig=210,4 Ref=off

| Peak # | RetTime [min] | Type | Width [min] | Area [mAU*s] | Height [mAU] | Area %  |
|--------|---------------|------|-------------|--------------|--------------|---------|
| 1      | 48.316        | MM   | 1.6431      | 3.87689e4    | 393.24020    | 49.1995 |
| 2      | 52.492        | MM   | 1.5328      | 4.00305e4    | 435.27069    | 50.8005 |



HPLC after ATH of (4-methoxyphenyl)(4-(4,4,5,5-tetramethyl-1,3,2-dioxaborolan-2-yl)phenyl)methanone using (*R,R*)-3C-Tethered Ru(II)-TsDPEN catalyst **2** (after 72 hours, 100% conversion, 20% ee).

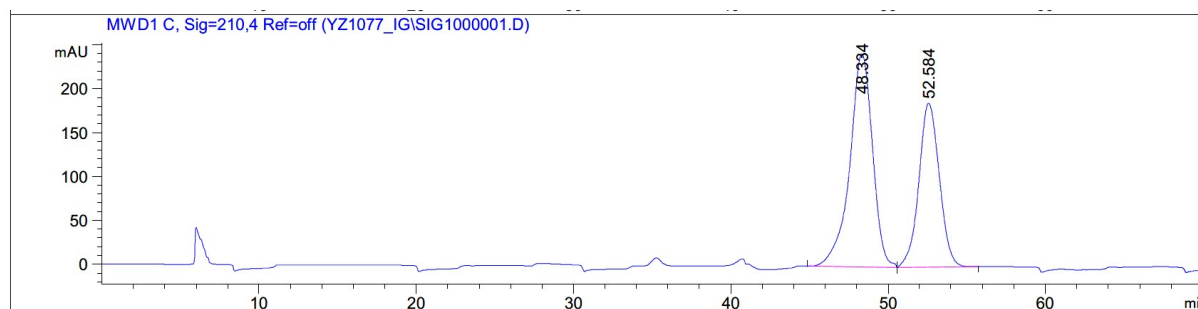

Signal 2: MWD1 C, Sig=210,4 Ref=off

| Peak # | RetTime [min] | Type | Width [min] | Area [mAU*s] | Height [mAU] | Area %  |
|--------|---------------|------|-------------|--------------|--------------|---------|
| 1      | 48.334        | BB   | 1.5246      | 2.45206e4    | 242.71507    | 59.1423 |
| 2      | 52.584        | BB   | 1.3859      | 1.69397e4    | 186.80972    | 40.8577 |

Totals : 4.14603e4 429.52480

Phenyl(2-(4,4,5,5-tetramethyl-1,3,2-dioxaborolan-2-yl)phenyl)methanone.

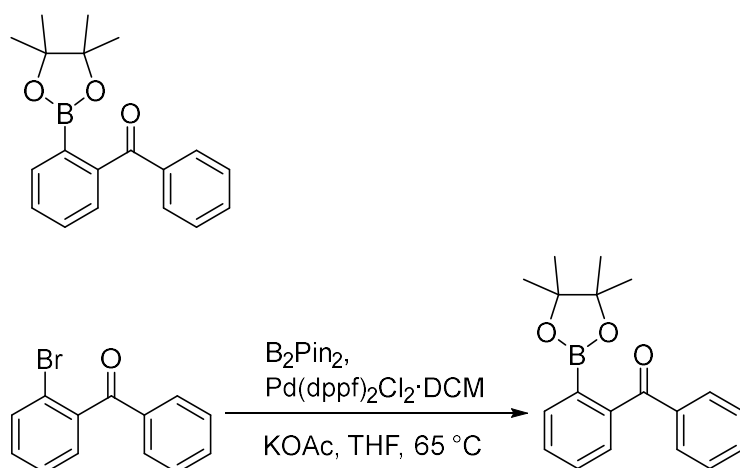

This compound has been reported and fully characterized: K. L. Billingsley, T. E. Barder and S. L. Buchwald, *Angew. Chem., Int. Ed.*, 2007, **46**, 55359-5363.

A round-bottom flask was charged with 2-bromobenzophenone (130 mg, 0.500 mmol), bis(pinacolato)diboron (152 mg, 0.600 mmol), potassium acetate (147 mg, 1.50 mmol), THF (3.2 mL) and  $Pd(dppf)_2Cl_2 \cdot DCM$  (20.4 mg, 0.0250 mmol). The reaction mixture was heated to 65 °C and left stirring under the nitrogen atmosphere overnight, followed by TLC (9:1 hexane: EtOAc). The mixture was quenched by distilled water (20 mL). EtOAc (20 mL) was added and the organic layer was separated. The aqueous layer was extracted with EtOAc (3 × 20 mL), and the combined organic layers were dried ( $MgSO_4$ ) and filtered. Solvent was removed to give the crude product. The product was isolated via flash chromatography on silica eluted with 0-50% ethyl acetate in hexane to give phenyl(2-(4,4,5,5-tetramethyl-1,3,2-dioxaborolan-2-yl)phenyl)methanone as a white solid (50.5 mg, 0.164 mmol, 33%). TLC:  $R_f$  ca 0.50 (9:1 hexane: EtOAc), strong UV and  $KMnO_4$ ;  $\delta_H$  (500 MHz,  $CDCl_3$ ) 7.79 (3H, dd,  $J = 17.3, 7.2$ , ArH), 7.56-7.42 (6H, m, ArH), 1.18 (12H, s,  $CH_3$ ) ppm;  $\delta_C$  (125 MHz,  $CDCl_3$ ) 198.20 (C), 143.65 (C), 138.15 (C), 133.82 (CH), 132.40 (CH), 130.36 (CH), 130.04 (CH), 129.71 (CH), 128.94 (CH), 128.22 (CH), 84.02 (C), 24.56 ( $CH_3$ ) ppm. Data matched that reported.

Enantiomeric excess and conversion determined by HPLC analysis (Chiralpak ODH, 30 cm x 6mm column, hexane:iPrOH 95:5, 1.0 mL/min,  $T = 25^\circ C$ ) ketone 5.4 min, *R* and *S* isomers 4.2 min and 5.5 min.

$^1\text{H}$  NMR (500 MHz,  $\text{CDCl}_3$ )

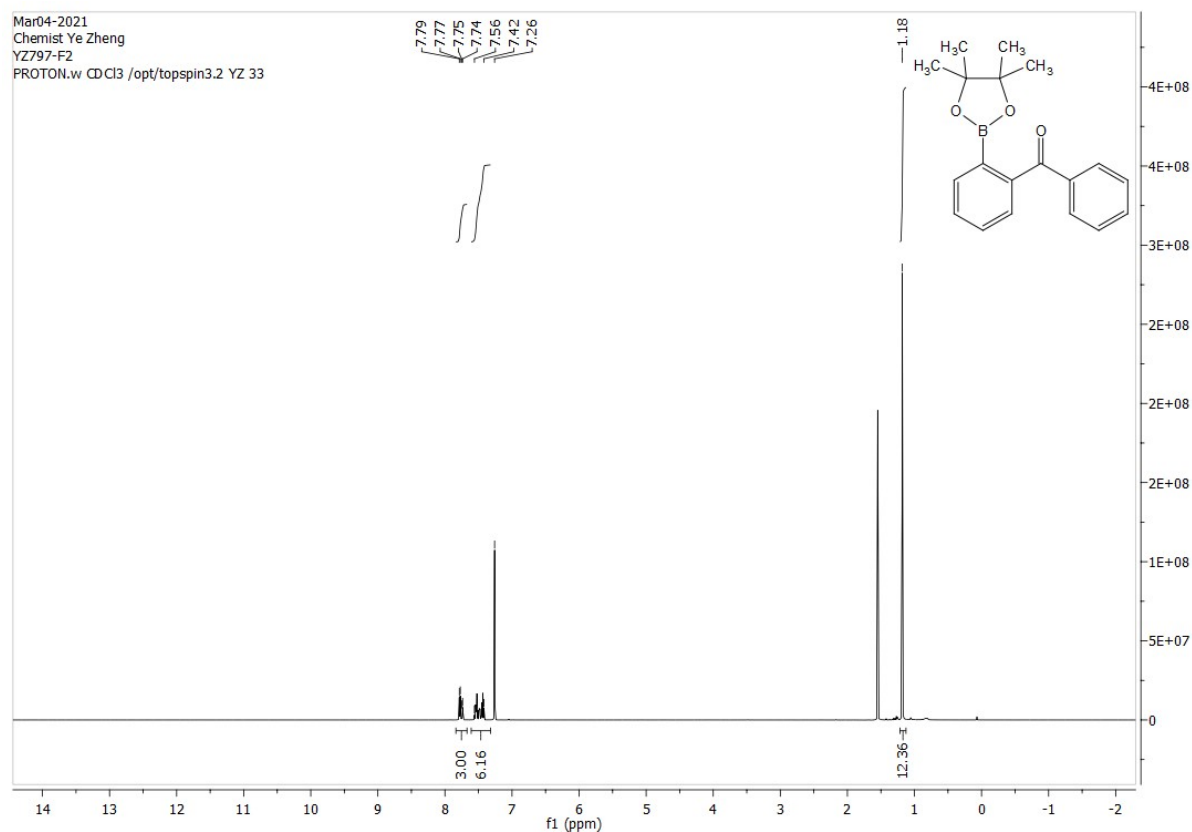

$^{13}\text{C}$  NMR (125 MHz,  $\text{CDCl}_3$ )

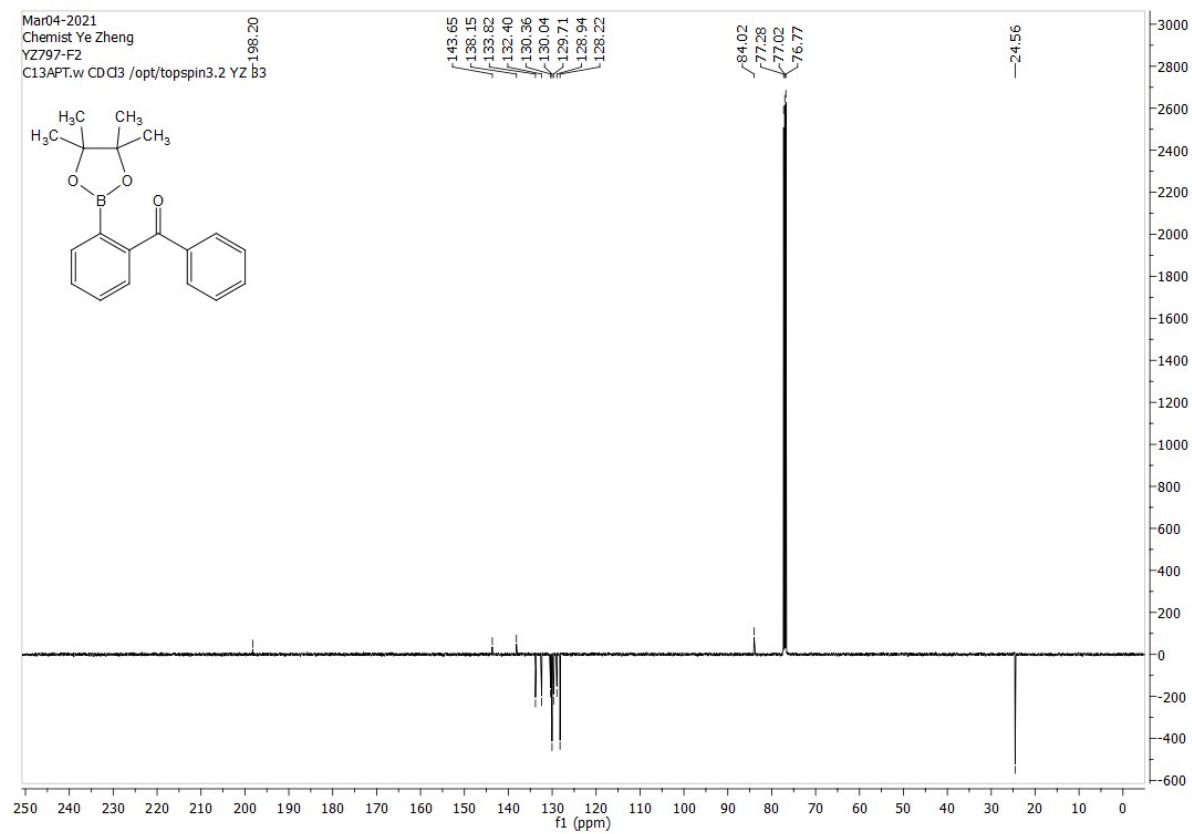

# HPLC of phenyl(2-(4,4,5,5-tetramethyl-1,3,2-dioxaborolan-2-yl)phenyl)methanone

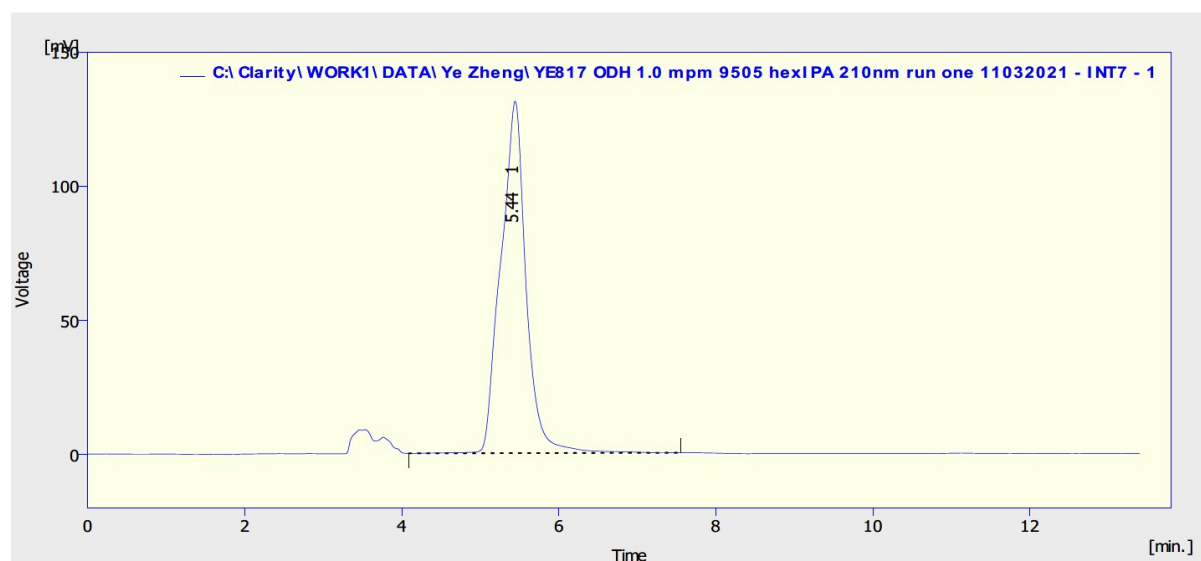

Result Table (Uncal - C:\Clarity\WORK1\DATA\Ye Zheng\YE817 ODH 1.0 mpm 9505 hexIPA 210nm run one 11032021 - INT7 - 1)

|   | Reten. Time<br>[min] | Area<br>[mV.s] | Height<br>[mV] | Area<br>[%] | Height<br>[%] | W05<br>[min] | Compound<br>Name |
|---|----------------------|----------------|----------------|-------------|---------------|--------------|------------------|
| 1 | 5.443                | 2940.350       | 131.262        | 100.0       | 100.0         | 0.34         |                  |
|   | Total                | 2940.350       | 131.262        | 100.0       | 100.0         |              |                  |

3-Phenylbenzo[c][1,2]oxaborol-1(3H)-ol **25**.

**Compound picture :**

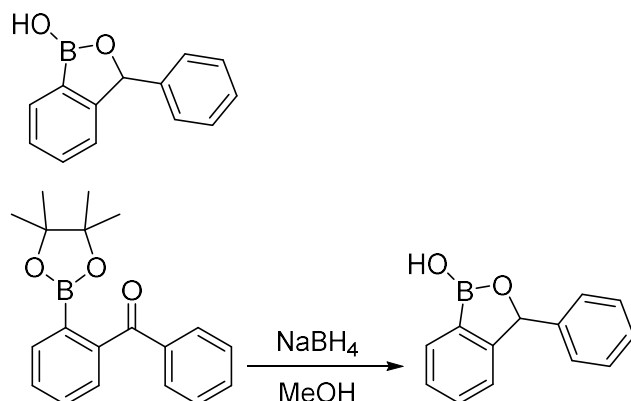

This compound has been reported (racemic) but not fully characterized: D. S. Gunasekera, D. J. Gerold, N. S. Aalderks, J. S. Chandra, C. A. Maanu, P. Kiprof, V. V. Zhdankin and M. V. R. Reddy, *Tetrahedron*, 2007, **63**, 9401-9405.

To a solution of phenyl(2-(4,4,5,5-tetramethyl-1,3,2-dioxaborolan-2-yl)phenyl)methanone (153 mg, 0.497 mmol) in MeOH (2.5 mL) was added sodium borohydride (37.8 mg, 0.994 mmol). The reaction was stirred for 4 hours. TLC (9:1 hexane: EtOAc) after this time indicated full conversion. Distilled water (20 mL) was added, and the mixture was extracted with EtOAc (3 × 20 mL), dried with MgSO<sub>4</sub>. Solvent was removed to give the crude product. The reaction was followed by TLC (9:1 hexane: EtOAc). The product was isolated via flash chromatography on silica eluted with 0-50% ethyl acetate in hexane to give 3-phenylbenzo[c][1,2]oxaborol-1(3H)-ol **25** as a white solid (41.5 mg, 0.198 mmol, 40%). TLC: R<sub>f</sub> ca 0.20 (9:1 hexane: EtOAc), strong UV and KMnO<sub>4</sub>;  $\delta_{\text{H}}$  (400 MHz, CDCl<sub>3</sub>) 7.78 (1H, d,  $J$  = 7.2, ArH), 7.47-7.24 (7H, m, ArH), 7.17 (1H, d,  $J$  = 7.6, ArH), 6.18 (1H, s, ArCH), 5.42 (1H, s, OH) ppm;  $\delta_{\text{C}}$  (100 MHz, CDCl<sub>3</sub>) 156.76 (C), 140.11 (C), 131.50 (CH), 131.41 (CH), 130.42 (CH), 128.71 (CH), 128.41 (CH), 127.61 (CH), 126.88 (CH), 122.37 (CH), 83.79 (CH) ppm. Data matched that reported.

Enantiomeric excess and conversion determined by HPLC analysis (Chiralcel ODH, 30 cm x 6mm column, hexane:iPrOH 95:5, 1.0 mL/min, T = 25°C) ketone 5.4 min, *R* and *S* isomers 4.2 min and 5.5 min, configuration is not confirmed.

ATH of phenyl(2-(4,4,5,5-tetramethyl-1,3,2-dioxaborolan-2-yl)phenyl)methanone).

(*R,R*)-3C-tethered Ru(II)-TsDPEN catalyst **2** (2.0 mg, 0.0033 mmol, 1 mol%) was added to FA: TEA (5:2 azeotropic mixture, 0.45 mL) at rt and the mixture was stirred under a nitrogen inert atmosphere for 10-15 minutes; after which a solution of phenyl(2-(4,4,5,5-tetramethyl-1,3,2-dioxaborolan-2-yl)phenyl)methanone (100 mg, 0.325 mmol) in DCM (0.63 mL) was added. The reaction mixture was stirred under a nitrogen atmosphere, followed by TLC (9:1 hexane: EtOAc). After 72 hours, the reaction was quenched using saturated NaHCO<sub>3</sub> solution (20 mL). EtOAc (20 mL) was added and the organic layer was separated. The aqueous layer was extracted with EtOAc (3 x 20 mL) and the combined organic layers were dried (MgSO<sub>4</sub>) and filtered. The solvent was removed to give the crude product. The product was isolated via flash chromatography on silica eluted with 0-50% ethyl acetate in hexane to give 3-phenylbenzo[*c*][1,2]oxaborol-1(3H)-ol **25** (47.0 mg, 0.224 mmol, 69%). The reaction was also followed by HPLC analysis (Chiralcel ODH, 30 cm x 6mm column, hexane:iPrOH 95:5, 1.0 mL/min, T = 25°C): 100% conversion; [ $\alpha$ ]<sub>D</sub><sup>17</sup> +2.29 (c 0.940 in CHCl<sub>3</sub>) 23% ee.

$^1\text{H}$  NMR (400 MHz,  $\text{CDCl}_3$ )

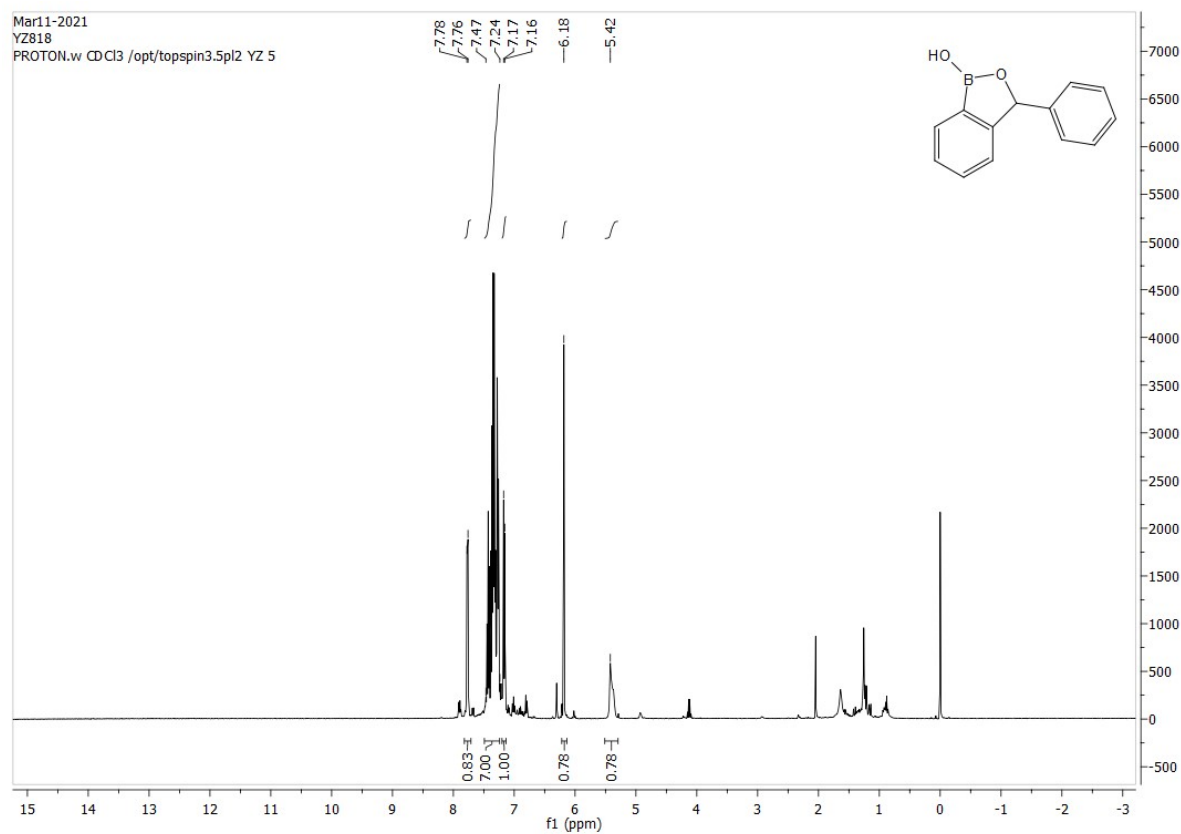

$^{13}\text{C}$  NMR (100 MHz,  $\text{CDCl}_3$ )

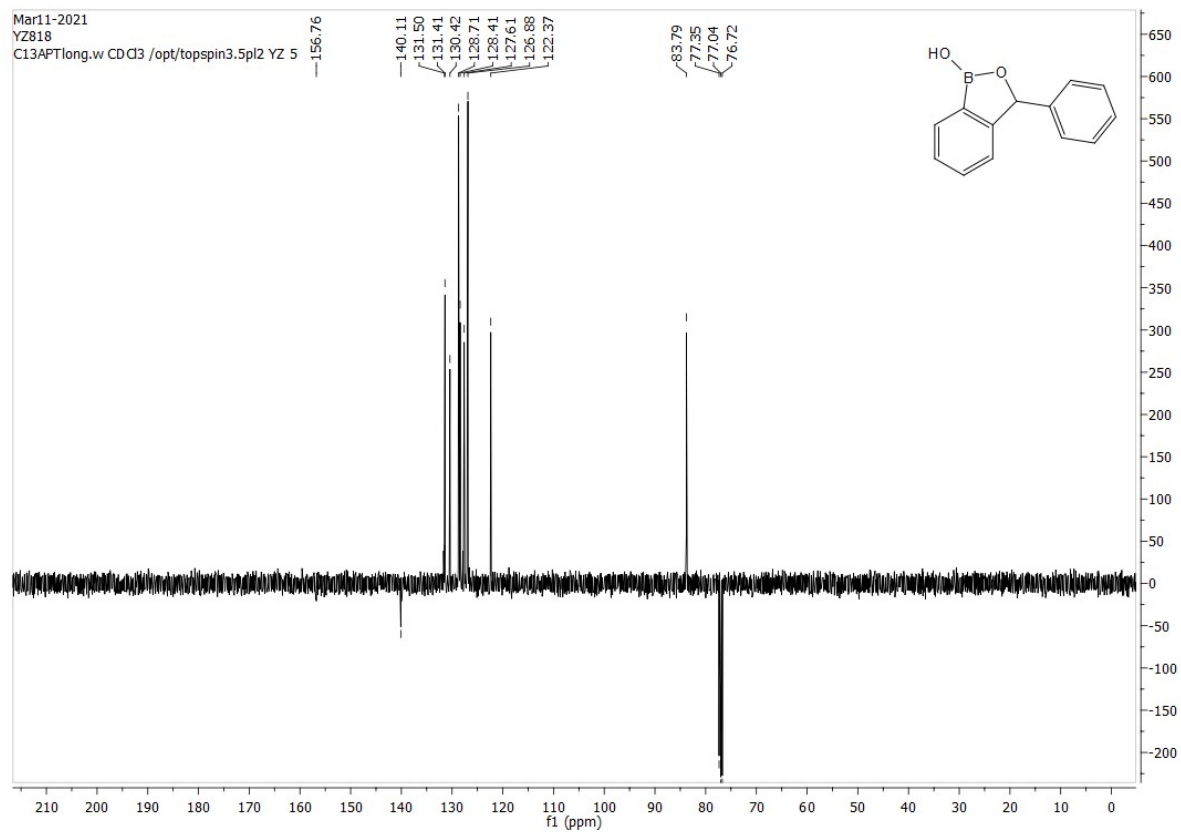

HPLC of racemic phenylbenzo[c][1,2]oxaborol-1(3H)-ol **25**.

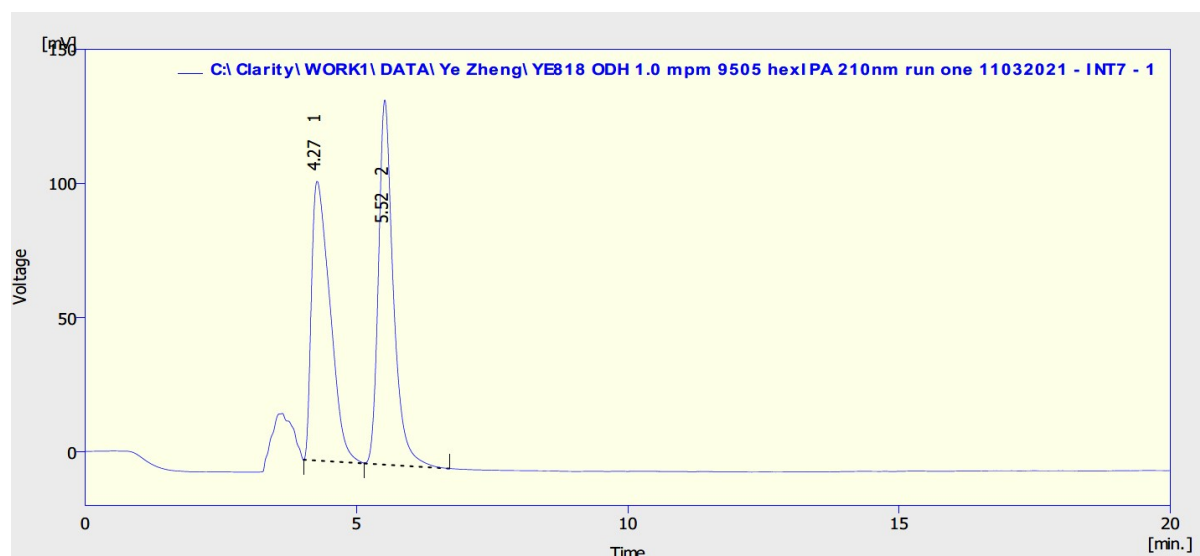

Result Table (Uncal - C:\Clarity\WORK1\DATA\Ye Zheng\YE818 ODH 1.0 mpm 9505 hexIPA 210nm run one 11032021 - INT7 - 1)

|   | Reten. Time [min] | Area [mV.s] | Height [mV] | Area [%] | Height [%] | W05 [min] | Compound Name |
|---|-------------------|-------------|-------------|----------|------------|-----------|---------------|
| 1 | 4.273             | 2472.933    | 104.144     | 48.8     | 43.4       | 0.38      |               |
| 2 | 5.520             | 2592.828    | 135.885     | 51.2     | 56.6       | 0.28      |               |
|   | Total             | 5065.761    | 240.029     | 100.0    | 100.0      |           |               |

HPLC after ATH of phenyl(2-(4,4,5,5-tetramethyl-1,3,2-dioxaborolan-2-yl)phenyl)methanone using (*R,R*)-3C-tethered Ru(II)-TsDPEN catalyst **2** (after 72 hours, 100% conversion, 23% ee)

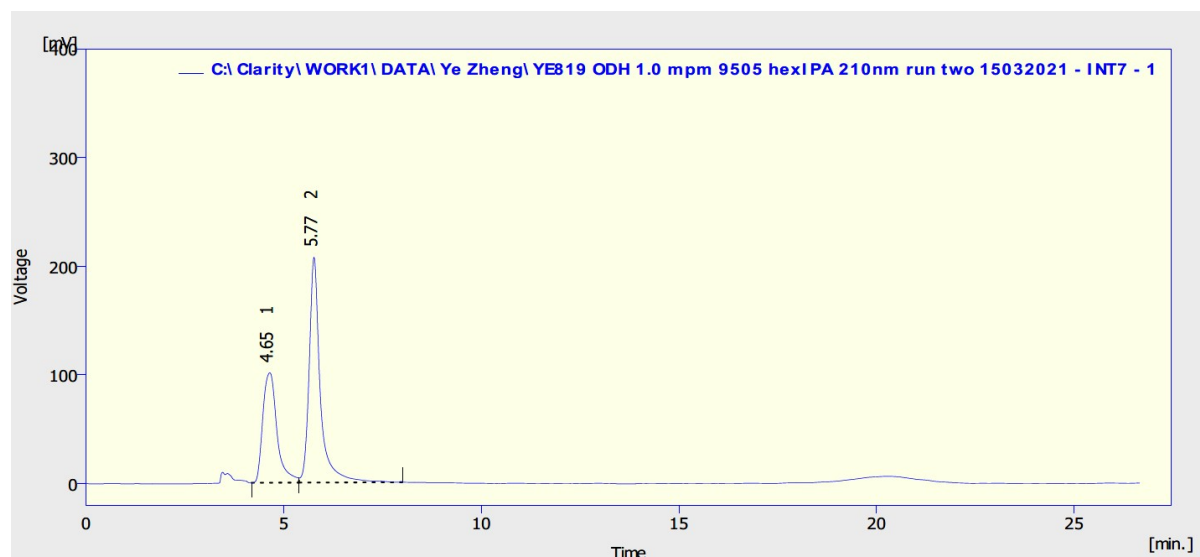

Result Table (Uncal - C:\Clarity\WORK1\DATA\Ye Zheng\YE819 ODH 1.0 mpm 9505 hexIPA 210nm run two 15032021 - INT7 - 1)

|   | Reten. Time [min] | Area [mV.s] | Height [mV] | Area [%] | Height [%] | W05 [min] | Compound Name |
|---|-------------------|-------------|-------------|----------|------------|-----------|---------------|
| 1 | 4.647             | 2529.556    | 101.207     | 38.3     | 32.8       | 0.37      |               |
| 2 | 5.767             | 4078.658    | 207.434     | 61.7     | 67.2       | 0.26      |               |
|   | Total             | 6608.214    | 308.641     | 100.0    | 100.0      |           |               |



(2-Bromophenyl)(o-tolyl)methanol.

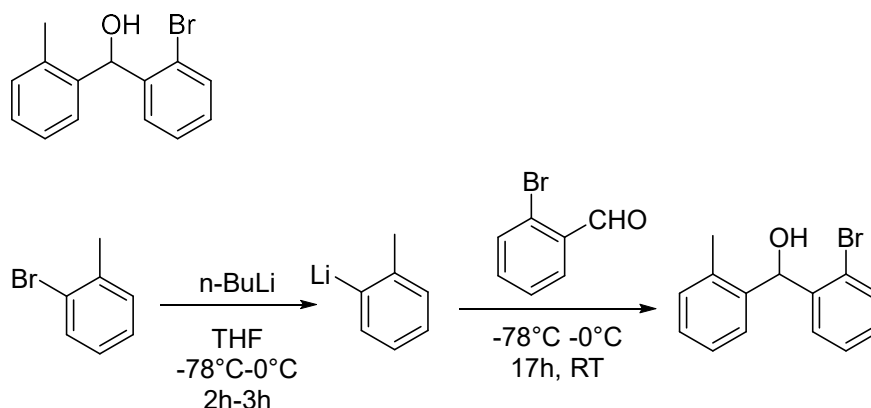

This compound has been reported and fully characterized: Yuan-Xi Liao, Chun-Hui Xing, Matthew Israel, Qiao-Sheng Hu, *Tetrahedron Letters*, 2011, **52**, 3324-3328

To a solution of 2-bromotoluene (188 mg, 1.10 mmol) in THF (2.4 mL) at -78 °C was added dropwise a solution of n-butyllithium (0.400 mL, 2.5M in hexanes, 1.00 mmol). The reaction mixture was then stirred under a nitrogen atmosphere for 2-3 hours, after which 2-bromobenzaldehyde (185 mg, 1.00 mmol) was added dropwise. The reaction mixture was left stirring under the nitrogen atmosphere and allowed to warm to rt. The reaction was followed by TLC (9:1 hexane: EtOAc). The mixture was quenched by saturated NH<sub>4</sub>Cl solution (20 mL). EtOAc (20 mL) was added and the organic layer was separated. The aqueous layer was extracted with EtOAc (3 × 20 mL), and the combined organic layers were dried (MgSO<sub>4</sub>) and filtered. Solvent was removed to give the crude product. The product was isolated via flash chromatography on silica eluted with 0-20% EtOAc in hexane to give (2-bromophenyl)(o-tolyl)methanol as a white solid (256 mg, 0.928 mmol, 93%). TLC: R<sub>f</sub> ca 0.30 TLC (9:1 hexane: EtOAc)., strong UV and KMnO<sub>4</sub>; δ<sub>H</sub> (400 MHz, CDCl<sub>3</sub>) 7.56 (1H, d, *J* = 7.9, ArH), 7.32 (3H, dt, *J* = 14.9, 6.8, ArH), 7.24-7.13 (4H, m, ArH), 6.28 (1H, d, *J* = 4.5, ArCHOH), 2.28 (3H, s, CH<sub>3</sub>), 2.25 (1H, d, *J* = 4.5, ArCHOH) ppm; δ<sub>C</sub> (100 MHz, CDCl<sub>3</sub>) 141.84 (C), 139.89 (C), 136.07 (C), 132.90 (CH), 130.52 (CH), 129.25 (CH), 128.87 (CH), 127.83 (CH), 127.65 (CH), 126.33 (CH), 126.12 (CH), 123.66 (C), 72.19 (CH), 19.21 (CH<sub>3</sub>) ppm.

$^1\text{H}$  NMR (400 MHz,  $\text{CDCl}_3$ )

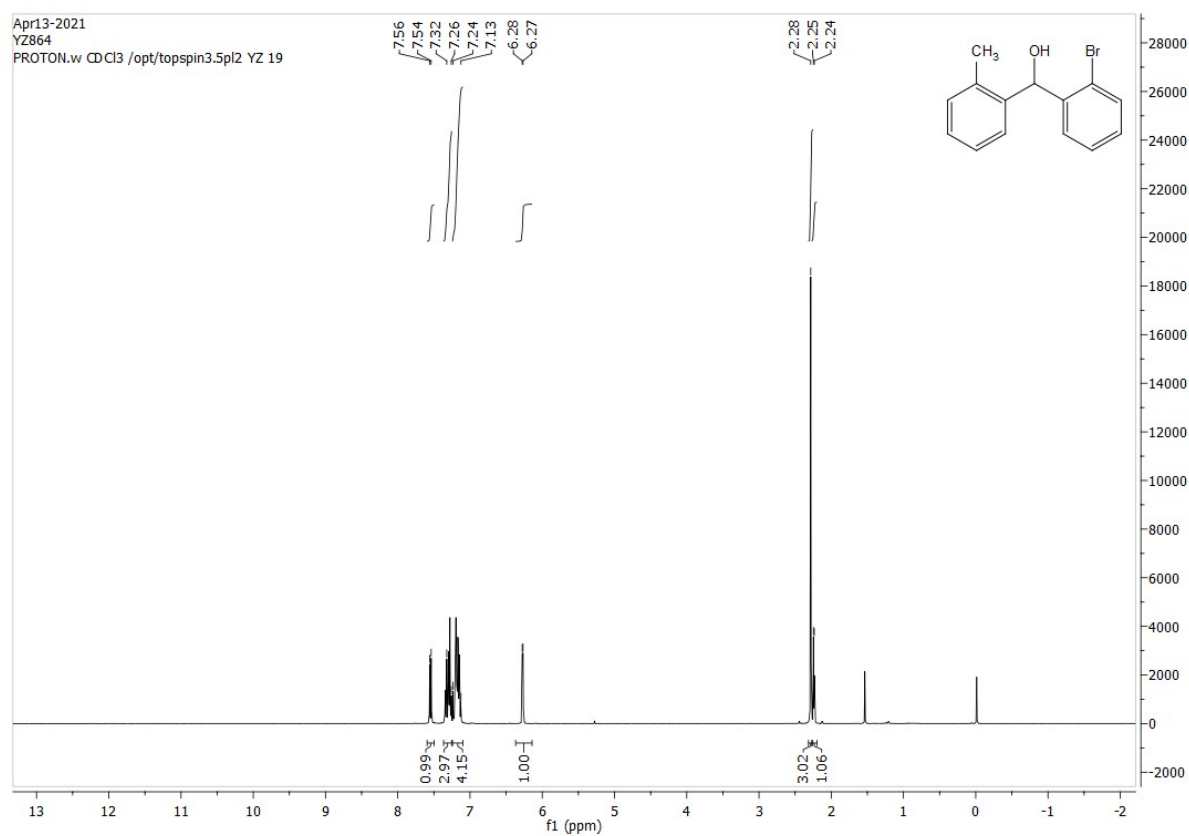

$^{13}\text{C}$  NMR (100 MHz,  $\text{CDCl}_3$ )

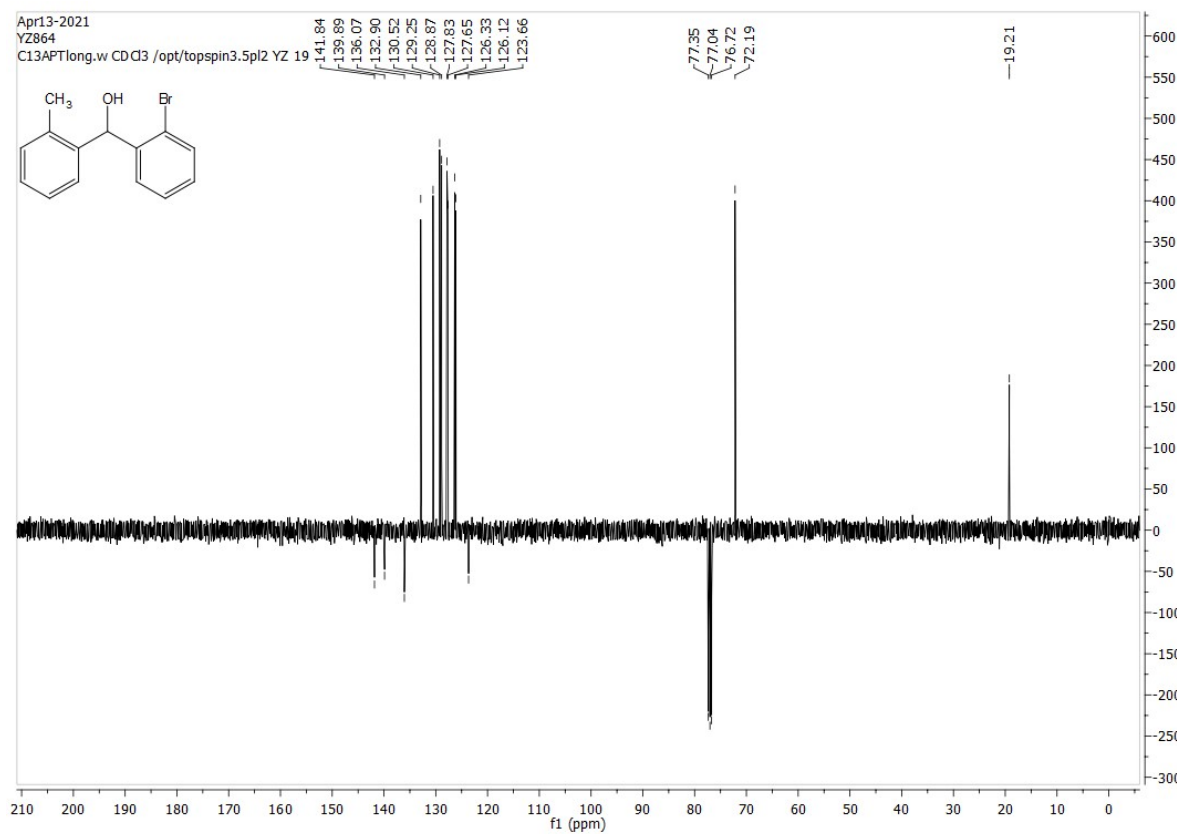

(2-Bromophenyl)(*o*-tolyl)methanone.

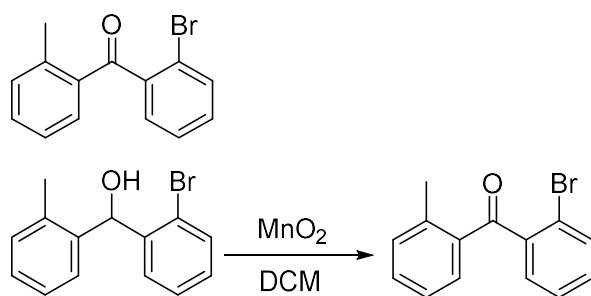

This compound has been reported and fully characterized: P. Sharma, S. Rohilla and N. Jain, *J. Org. Chem.*, 2017, **82**, 1105-1113.

To a solution of (2-bromophenyl)(*o*-tolyl)methanol (1.00 g, 3.62 mmol) in DCM (25 mL) at rt was added manganese dioxide (9.47 g, 109 mmol). The reaction mixture was left to stir under a nitrogen atmosphere overnight. TLC (9:1 hexane: EtOAc) after this time indicated full conversion. The solids were removed by gravity filtration and washed with DCM. The combined solvent was removed to give the product as a colorless oil (854 mg, 3.12 mmol, 86%). TLC: R<sub>f</sub> ca 0.50 (9:1 hexane: EtOAc), strong UV and KMnO<sub>4</sub>;  $\delta_{\text{H}}$  (400 MHz, CDCl<sub>3</sub>) 7.63 (1H, d,  $J$  = 7.8, ArH), 7.44-7.36 (3H, m, ArH), 7.35-7.31 (3H, m, ArH), 7.19 (1H, t,  $J$  = 7.5, ArH), 2.59 (3H, s, CH<sub>3</sub>) ppm;  $\delta_{\text{C}}$  (100 MHz, CDCl<sub>3</sub>) 197.94 (C), 141.67 (C), 139.97 (C), 136.47 (C), 133.46 (CH), 132.15 (CH), 131.94 (CH), 131.69 (CH), 131.46 (CH), 129.86 (CH), 127.24 (CH), 125.55 (CH), 120.14 (C), 21.33 (CH<sub>3</sub>) ppm. Data matched that reported.

$^1\text{H}$  NMR (400 MHz,  $\text{CDCl}_3$ )

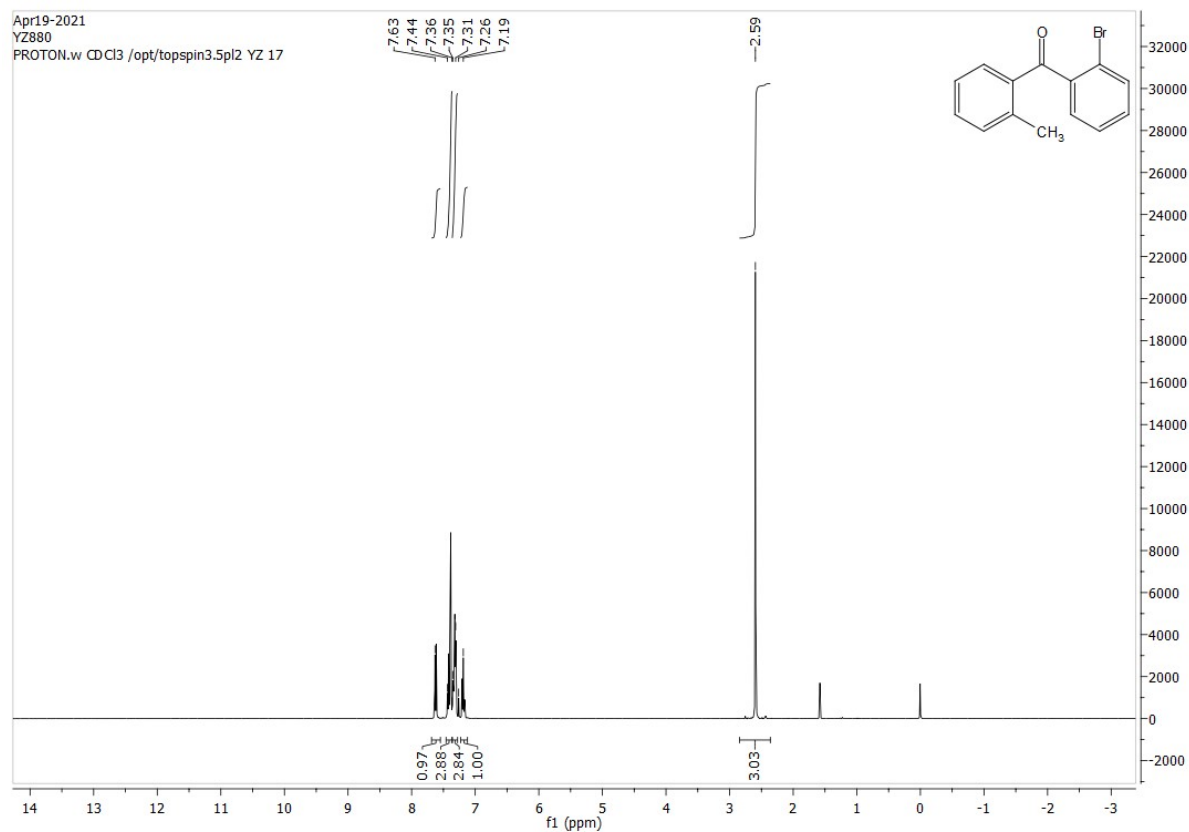

$^{13}\text{C}$  NMR (100 MHz,  $\text{CDCl}_3$ )

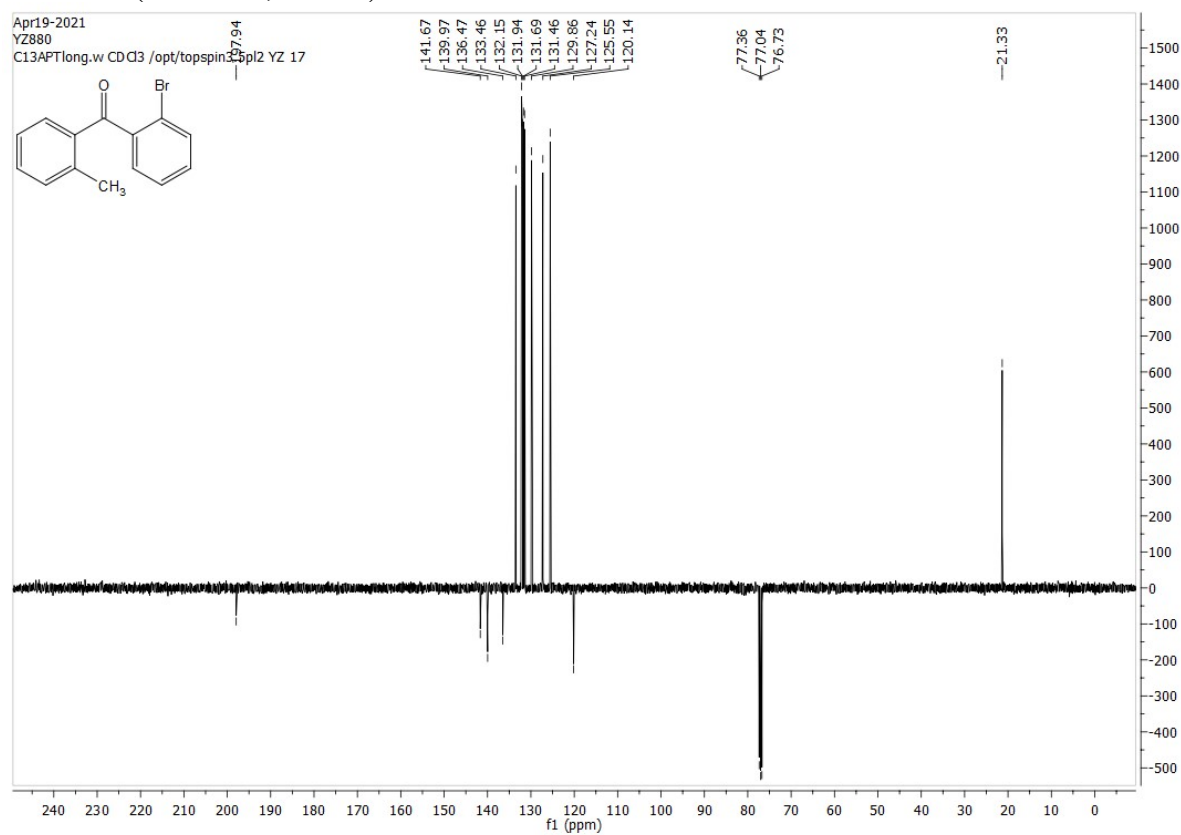

(2-(4,4,5,5-Tetramethyl-1,3,2-dioxaborolan-2-yl)phenyl)(*o*-tolyl)methanone.

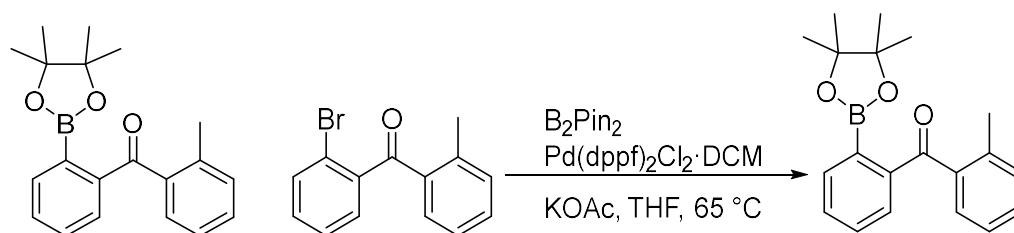

This compound is novel.

A round-bottom flask was charged with (2-bromophenyl)(*o*-tolyl)methanone (706 mg, 2.58 mmol), bis(pinacolato)diboron (787 mg, 3.10 mmol), potassium acetate (759 mg, 7.74 mmol), THF (16 mL) and  $Pd(dppf)_2Cl_2 \cdot DCM$  (105 mg, 0.129 mmol). The reaction mixture was heated to 65 °C and left stirring under the nitrogen atmosphere overnight, followed by TLC (9:1 hexane: EtOAc). The mixture was quenched by distilled water (20 mL). EtOAc (20 mL) was added and the organic layer was separated. The aqueous layer was extracted with EtOAc (3 × 20 mL), and the combined organic layers were dried ( $MgSO_4$ ) and filtered. Solvent was removed to give the crude product. The product was isolated via flash chromatography on silica eluted with 0-10% ethyl acetate in hexane to give (2-(4,4,5,5-tetramethyl-1,3,2-dioxaborolan-2-yl)phenyl)(*o*-tolyl)methanone as a white solid (462 mg, 1.43 mmol, 56%). TLC:  $R_f$  ca 0.70 (9:1 hexane: EtOAc), strong UV and  $KMnO_4$ ; Mp: 124 °C; HRMS: (found (ESI+):  $[M+H]^+$ , Calcd for  $C_{20}H_{23}BNaO_3$  345.1632; Found 345.1635; 0.3 ppm error);  $\nu_{max}$  2972, 2926, 1649, 1561, 1370, 1340, 1301, 1267, 1254, 1144, 1108, 1069, 1033, 932, 855, 751  $cm^{-1}$ ;  $\delta_H$  (500 MHz,  $CDCl_3$ ) 7.66 (1H, d,  $J = 7.2$ , ArH), 7.52 (1H, td,  $J = 7.3, 1.0$ , ArH), 7.46 (1H, d,  $J = 7.4$ , ArH), 7.41-7.35 (2H, m, ArH), 7.31-7.26 (2H, m, ArH), 7.20 (1H, t,  $J = 7.4$ , ArH), 2.42 (3H, s,  $CH_3$ ), 1.32 (12H, s,  $CH_3$ ) ppm;  $\delta_C$  (125 MHz,  $CDCl_3$ ) 199.90 (C), 142.98 (C), 138.19 (C), 137.84 (C), 133.10 (CH), 131.51 (CH), 131.12 (CH), 130.55 (CH), 130.27 (CH), 129.52 (CH), 129.18 (CH), 125.15 (CH), 83.93 (C), 24.73 ( $CH_3$ ), 20.46 ( $CH_3$ ) ppm;  $m/z$  (ESI-API+) 345.2 ( $M^+ + 23$ , 100%).

Enantiomeric excess and conversion determined by HPLC analysis (Chiralcel OJ, 30 cm x 6mm column, hexane:iPrOH 97:3, 0.5 mL/min, T = 25°C) ketone 13.6 min, *R* and *S* isomers 14.9 min and 19.0 min.

$^1\text{H}$  NMR (500 MHz,  $\text{CDCl}_3$ )

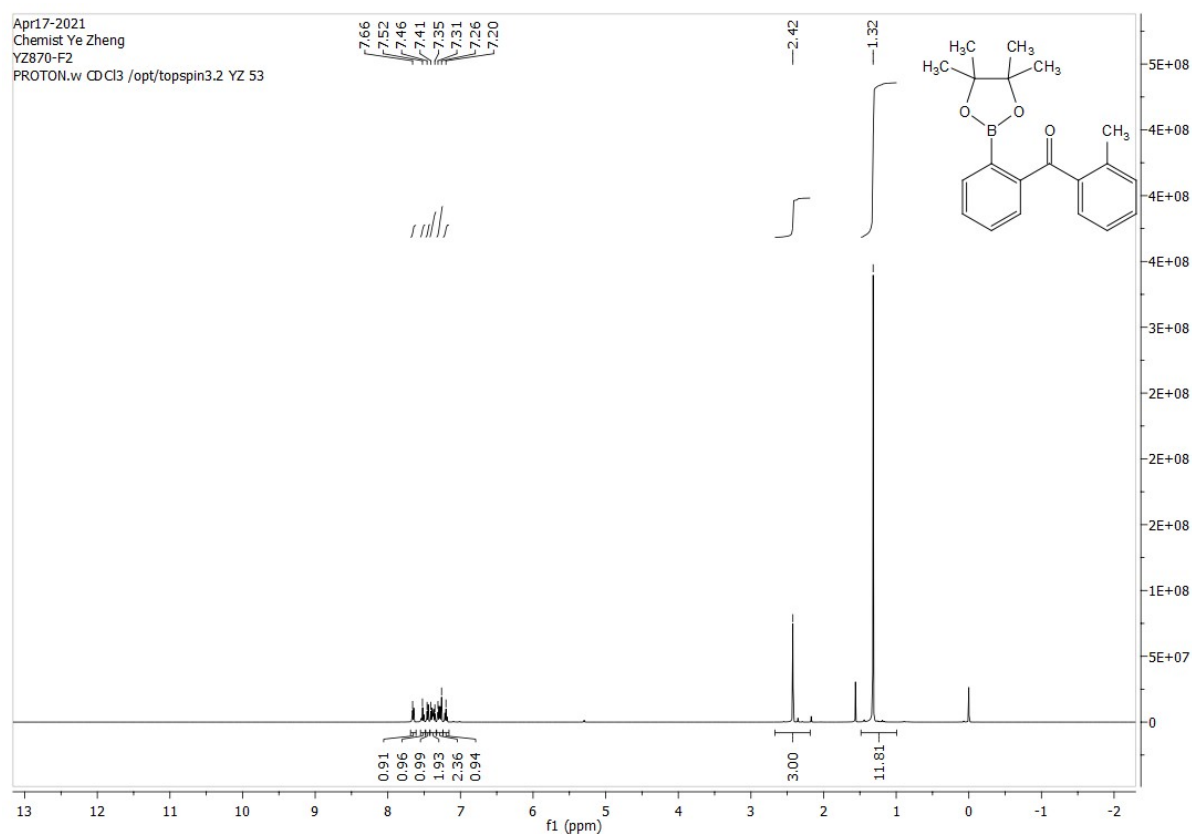

$^{13}\text{C}$  NMR (125 MHz,  $\text{CDCl}_3$ )

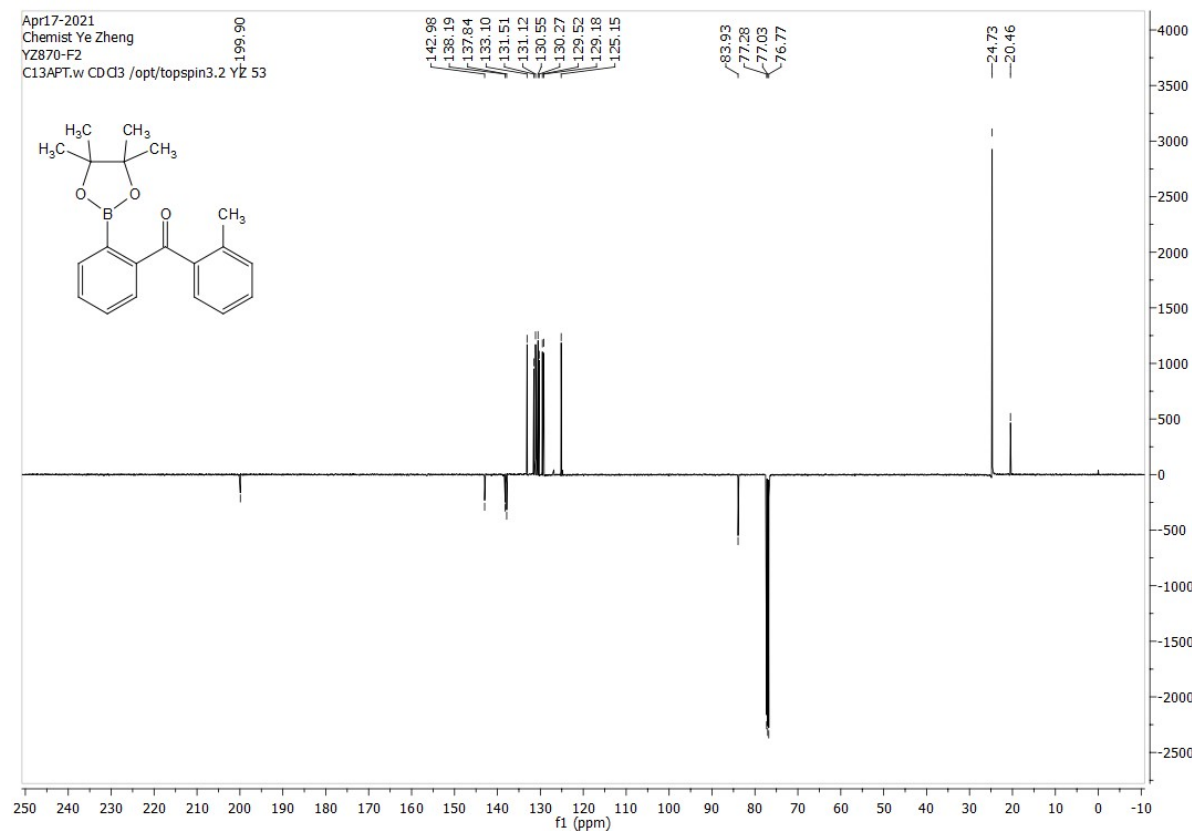

## COSY (500 MHz, CDCl<sub>3</sub>)

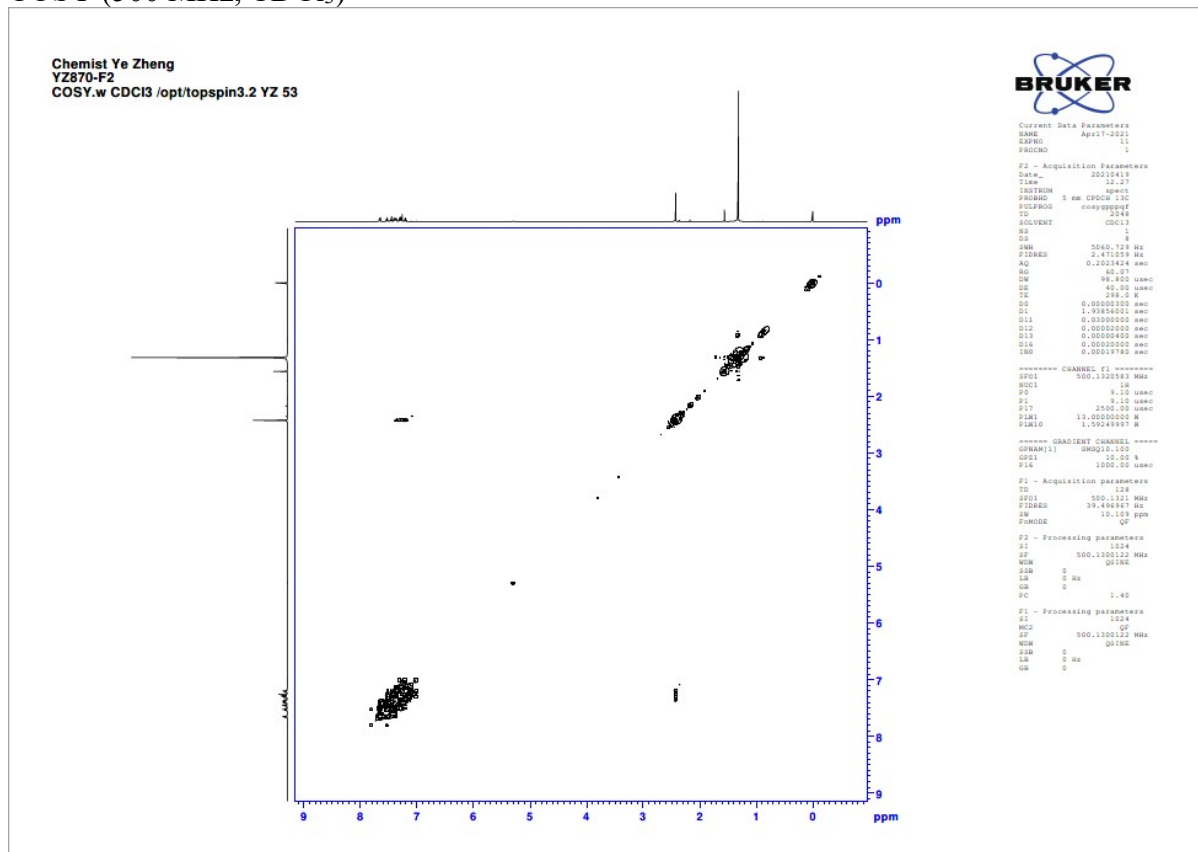

## HSQC (500 MHz, CDCl<sub>3</sub>)

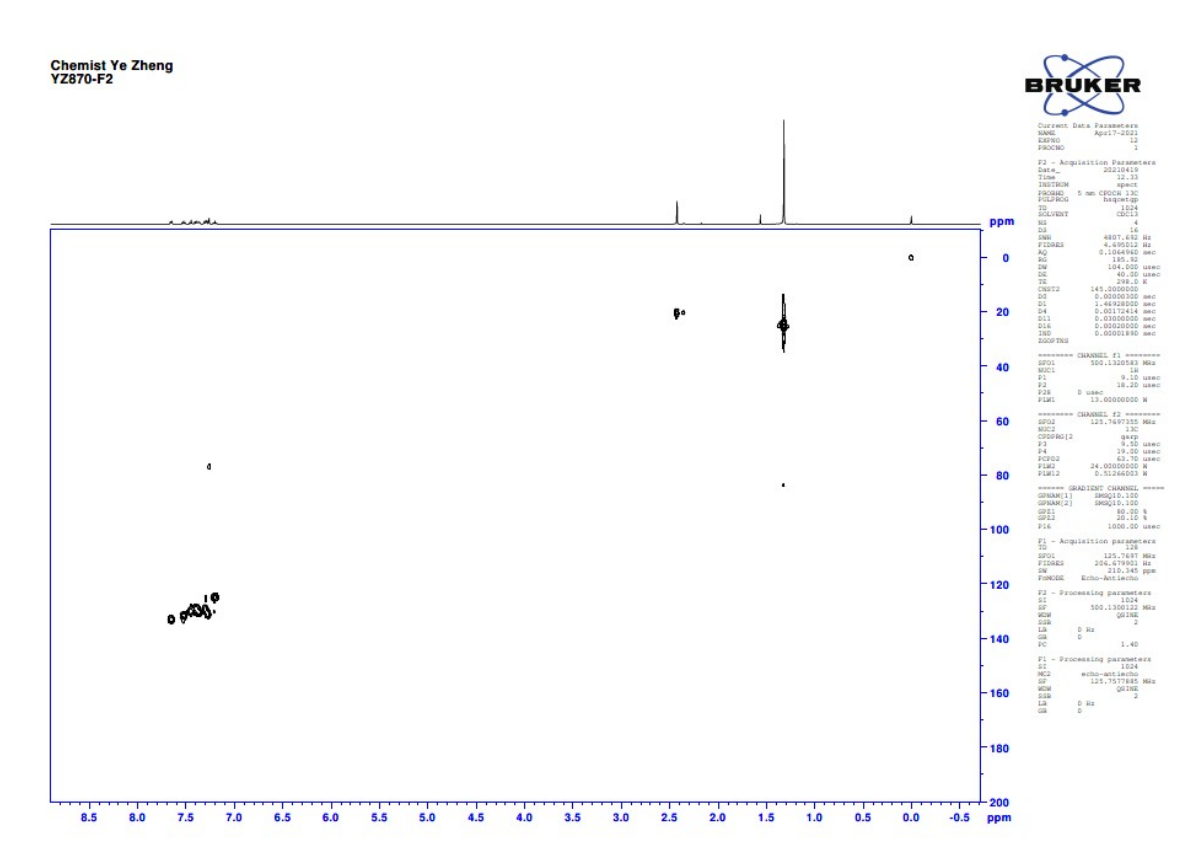

Chemist Ye Zheng  
YZ870-F2  
HMBC.w CDCl3 /opt/topspin3.2 YZ 53

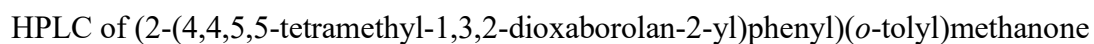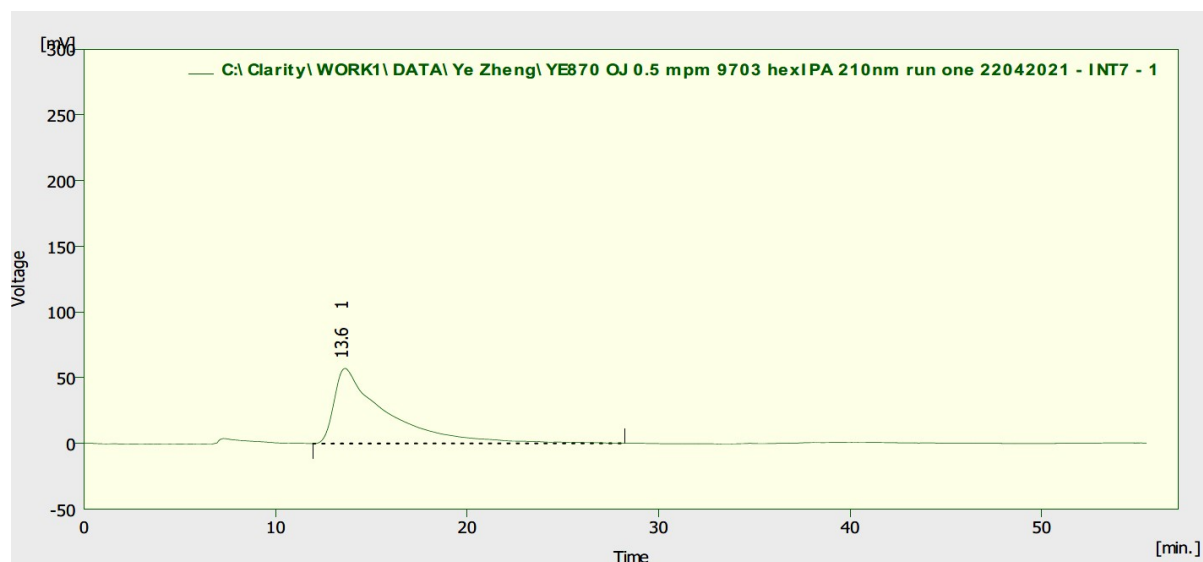

Result Table (Uncal - C:\Clarity\WORK1\DATA\Ye Zheng\YE870 OJ 0.5 mpm 9703 hexIPA 210nm run one 22042021 - INT7 - 1)

|   | Reten. Time<br>[min] | Area<br>[mV.s] | Height<br>[mV] | Area<br>[%] | Height<br>[%] | W05<br>[min] | Compound<br>Name |
|---|----------------------|----------------|----------------|-------------|---------------|--------------|------------------|
| 1 | 13.600               | 10779.113      | 57.243         | 100.0       | 100.0         | 2.35         |                  |
|   | Total                | 10779.113      | 57.243         | 100.0       | 100.0         |              |                  |



3-(*o*-Tolyl)benzo[*c*][1,2]oxaborol-1(3*H*)-ol **26**.

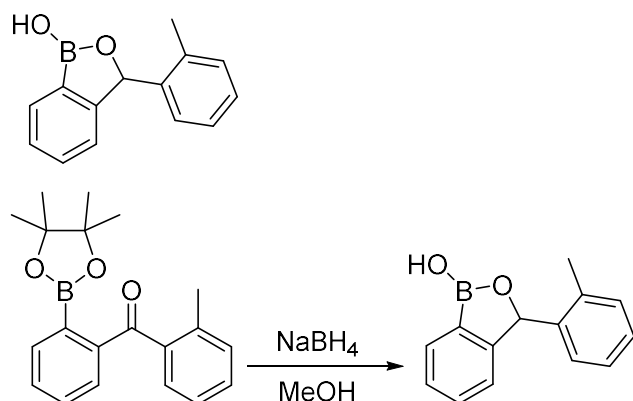

This compound is novel.

To a solution of (2-(4,4,5,5-tetramethyl-1,3,2-dioxaborolan-2-yl)phenyl)(*o*-tolyl)methanone (245 mg, 0.761 mmol) in MeOH (4.5 mL) was added sodium borohydride (57.8 mg, 1.52 mmol). The reaction was stirred for 4 hours. TLC (4:1 hexane: EtOAc) after this time indicated full conversion. Distilled water (20 mL) was added, and the mixture was extracted with EtOAc (3 × 20 mL), dried with MgSO<sub>4</sub>. Solvent was removed to give the crude product. The reaction was followed by TLC (4:1 hexane: EtOAc). The product was isolated via flash chromatography on silica eluted with 0-50% ethyl acetate in hexane to give 3-(*o*-tolyl)benzo[*c*][1,2]oxaborol-1(3*H*)-ol **26** as a white solid (103 mg, 0.460 mmol, 60%). TLC: R<sub>f</sub> ca 0.20 (4:1 hexane: EtOAc), strong UV and KMnO<sub>4</sub>; Mp: 121 °C; HRMS: (found (ESI<sup>+</sup>): [M+H]<sup>+</sup>, Calcd for C<sub>14</sub>H<sub>13</sub>BNaO<sub>2</sub> 247.0913; Found 247.0901; -3.9 ppm error); ν<sub>max</sub> 3381 (br), 3020, 2975, 1604, 1489, 1382, 1344, 1287, 1143, 1108, 1080, 974, 757, 732 cm<sup>-1</sup>; δ<sub>H</sub> (500 MHz, CDCl<sub>3</sub>) 7.78 (1H, d, *J* = 7.3, ArH), 7.43-7.40 (1H, m, ArH), 7.38-7.33 (1H, m, ArH), 7.23-7.18 (2H, m, ArH), 7.15 (1H, d, *J* = 7.3, ArH), 7.10 (1H, dt, *J* = 8.4, 3.3, ArH), 6.92 (1H, d, *J* = 7.7, ArH), 6.48 (1H, s, ArCH), 5.52 (1H, s, OH), 2.56 (1H, d, *J* = 2.2, OH), 2.50 (3H, s, CH<sub>3</sub>) ppm; δ<sub>C</sub> (125 MHz, CDCl<sub>3</sub>) 156.53 (C), 137.84 (C), 136.61 (C), 131.31 (CH), 130.87 (CH), 130.51 (CH), 128.38 (CH), 127.53 (CH), 127.18 (CH), 126.27 (CH), 122.38 (CH), 81.19 (C), 81.03 (CH), 19.47 (CH<sub>3</sub>) ppm. m/z (ES-API<sup>+</sup>) 247.1 (M<sup>+</sup> + 23, 100%).

Enantiomeric excess and conversion determined by HPLC analysis (Chiralcel OJ, 30 cm x 6mm column, hexane:iPrOH 97:3, 0.5 mL/min, T = 25°C) ketone 13.6 min, *R* and *S* isomers 14.9 min and 19.0 min, configuration is not confirmed.

ATH of (2-(4,4,5,5-tetramethyl-1,3,2-dioxaborolan-2-yl)phenyl)(*o*-tolyl)methanone. (*R,R*)-3C-tethered Ru(II)-TsDPEN catalyst **2** (4.00 mg, 0.00640 mmol, 1mol%) was added to FA: TEA (5:2 azeotropic mixture, 0.93 mL) at rt and the mixture was stirred under a nitrogen inert atmosphere for 10-15 minutes; after which a solution of (2-(4,4,5,5-tetramethyl-1,3,2-dioxaborolan-2-yl)phenyl)(*o*-tolyl)methanone (206 mg, 0.640 mmol) in DCM (1.30 mL) was added. The reaction mixture was stirred under a nitrogen atmosphere, followed by TLC (4:1 hexane: EtOAc). After 72 hours, the reaction was quenched using saturated NaHCO<sub>3</sub> solution (20 mL). EtOAc (20 mL) was added and the organic layer was separated. The aqueous layer was extracted with EtOAc (3 x 20 mL) and the combined organic layers were dried (MgSO<sub>4</sub>) and filtered. The solvent was removed to give the crude product. The product was isolated via flash chromatography on silica eluted with 0-50% ethyl acetate in hexane to give 3-(*o*-Tolyl)benzo[*c*][1,2]oxaborol-1(3H)-ol **26** (38.0 mg, 0.170 mmol, 27%). The reaction was also followed by HPLC analysis (Chiralcel OJ, 30 cm x 6mm column, hexane:iPrOH 97:3, 0.5 mL/min, T = 25°C): 100% conversion, 6% ee

$^1\text{H}$  NMR (500 MHz,  $\text{CDCl}_3$ )

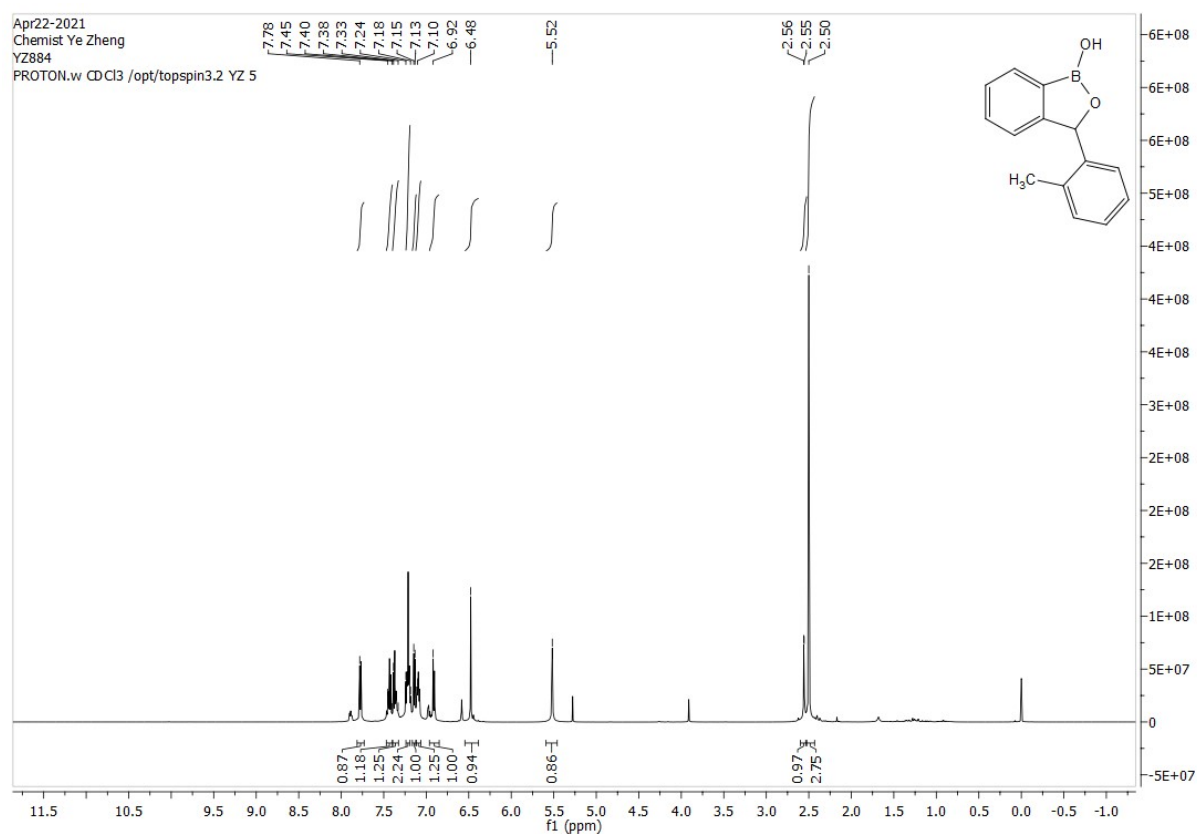

$^{13}\text{C}$  NMR (125 MHz,  $\text{CDCl}_3$ )

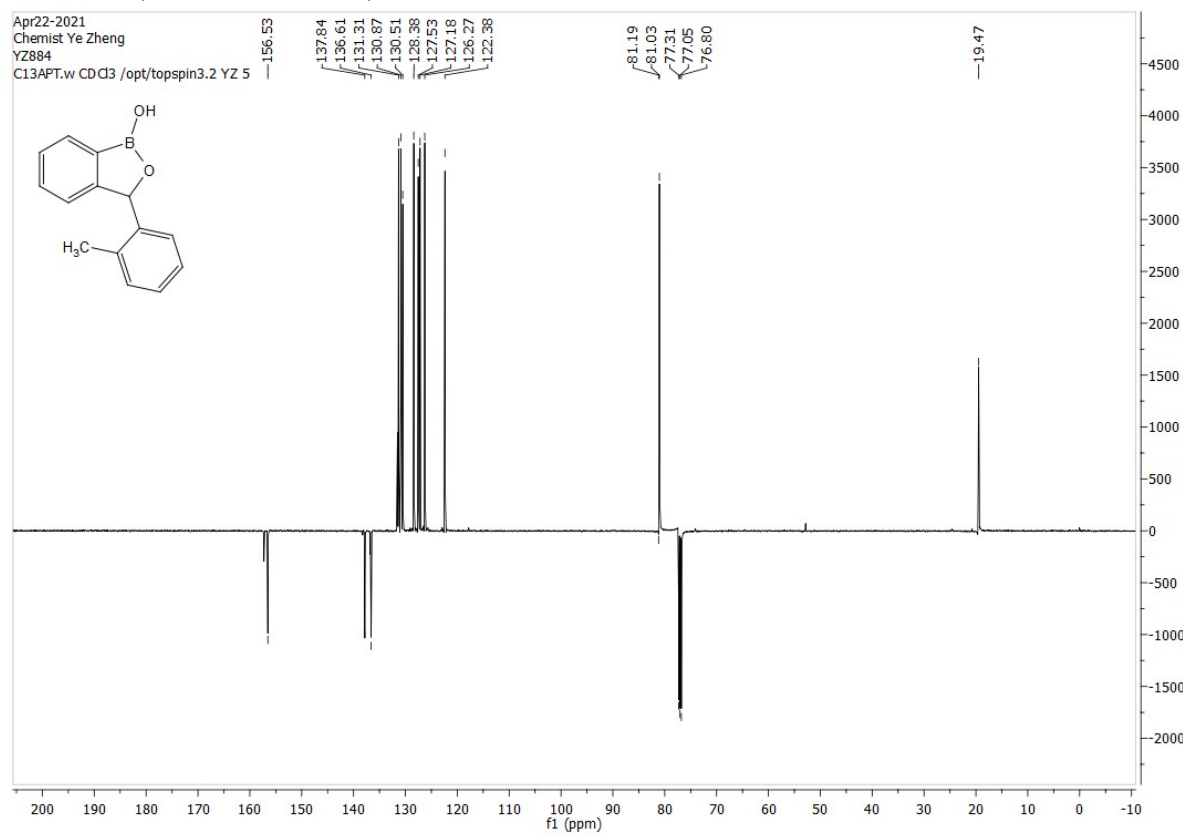

## COSY (500 MHz, CDCl<sub>3</sub>)

Chemist Ye Zheng  
YZ884  
COSY.w CDCl<sub>3</sub> /opt/topspin3.2 YZ 5

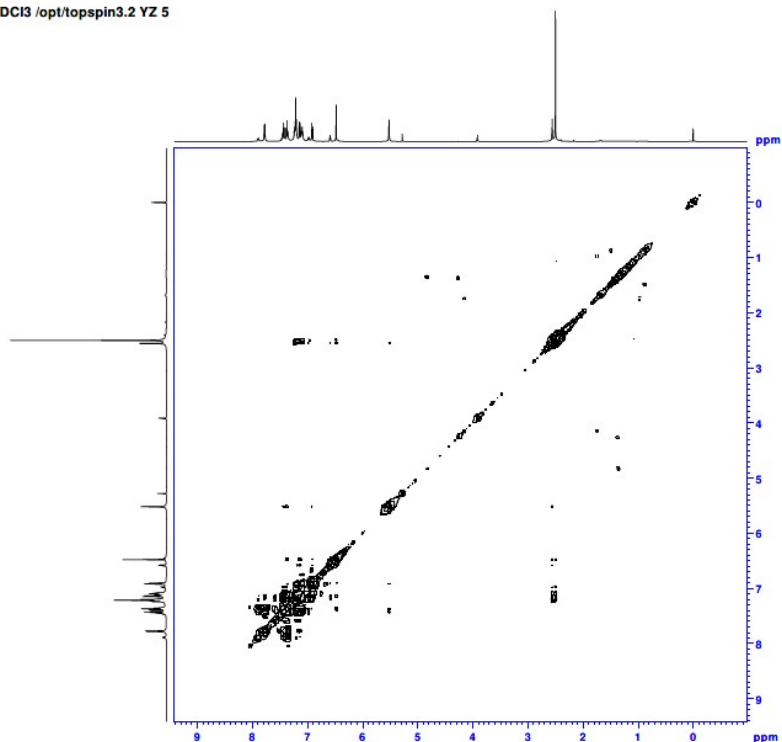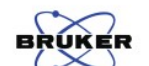

```
Current Data Parameters
NAME      Apr22-2021
EXPNO     11
PROCNO    1

F2 - Acquisition Parameters
Date_     20210422
Time      17.14
INSTRUM   spect
PROBHD    5 mm CPDPR 13C
PULPROG   zgpg30
TD         65536
SOLVENT   CDCl3
NS         1
DS         4
SWH        3107.1000 Hz
FIDRES     2.1579444 Hz
AQ         0.1870514 sec
RG         64.44
SR         94.200 usec
SE         40.00 usec
DE         288.0
DO         0.00000000 sec
D1         1.4441684 sec
d11        0.00000000 sec
d12        0.00000000 sec
d13        0.00000000 sec
d14        0.00000000 sec
d15        0.00000000 sec
SFO1       500.1321120 MHz
===== CHANNEL F1 =====
NUC1        13C
P1         9.10 usec
P18        30.00 usec
P17        13.00000000 M
P1610      1.56249997 M

===== GRADIENT CHANNEL =====
GRAN1[1]    SHG15.100
OP1         10.00 usec
P14         1000.00 usec

F1 - Acquisition parameters
TD          65536
SFO1        500.1321120 MHz
FIDRES      2.1579444 Hz
SW          3107.1000 Hz
PULPROG     zgpg30
PC           1.40

F2 - Processing parameters
SI          1024
SF          500.1302223 MHz
WDW         EM
SSB         0
LB           0 Hz
GB           0
PC           1.40

F1 - Processing parameters
SI          1024
SF          500.1302223 MHz
WDW         EM
SSB         0
LB           0 Hz
GB           0
PC           1.40
```

## HSQC (500 MHz, CDCl<sub>3</sub>)

Chemist Ye Zheng  
YZ884  
HSQC.w CDCl<sub>3</sub> /opt/topspin3.2 YZ 5

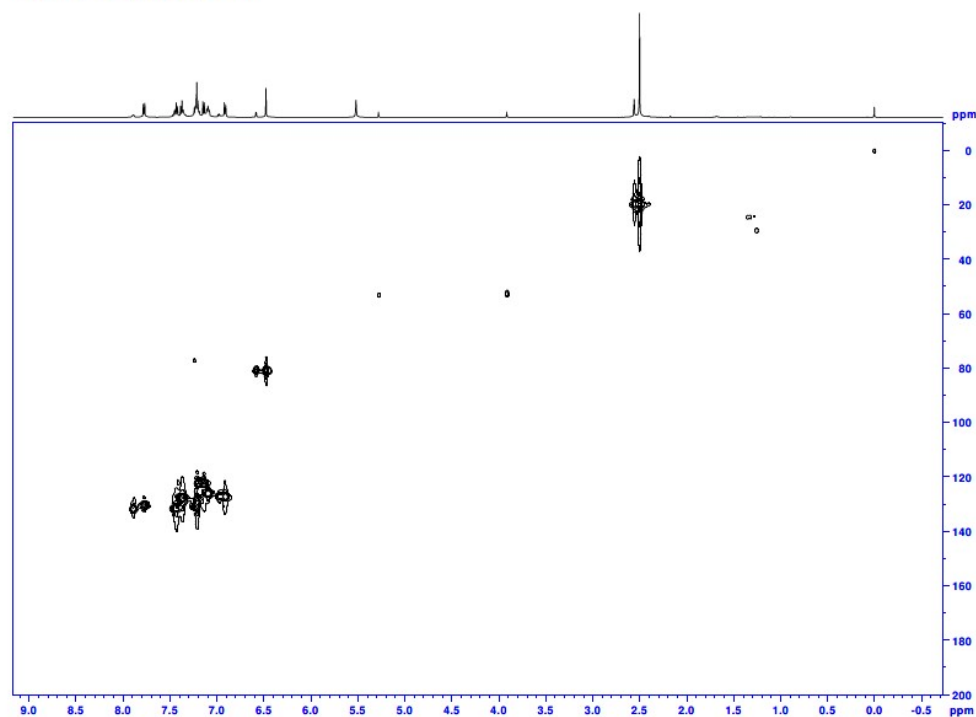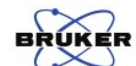

```
Current Data Parameters
NAME      Apr22-2021
EXPNO     12
PROCNO    1

F2 - Acquisition Parameters
Date_     20210422
Time      17.14
INSTRUM   spect
PROBHD    5 mm CPDPR 13C
PULPROG   zgpg30
TD         65536
SOLVENT   CDCl3
NS         1
DS         4
SWH        4950.435 Hz
FIDRES     4.818444 Hz
AQ         0.1024240 sec
RG         160.00
SR         100.000 usec
SE         40.00 usec
DE         288.0
DO         0.00000000 sec
D1         1.47215000 sec
d1         0.00172414 sec
d11        0.00000000 sec
d12        0.00000000 sec
d13        0.00000000 sec
d14        0.00000000 sec
SFO1       500.1321120 MHz
===== CHANNEL F1 =====
NUC1        13C
P1         9.10 usec
P18        30.00 usec
P17        13.00000000 M
P1610      1.56249997 M

===== CHANNEL F2 =====
SFO2       125.7677155 MHz
NUC2        13C
P2         9.10 usec
P218       30.00 usec
P217       13.00000000 M
P21610     1.56249997 M

===== GRADIENT CHANNEL =====
GRAN1[1]    SHG15.100
OP1         10.00 usec
P14         1000.00 usec

F1 - Acquisition parameters
TD          65536
SFO1        500.1321120 MHz
FIDRES      4.818444 Hz
SW          4950.435 Hz
PULPROG     zgpg30
PC           1.40

F2 - Processing parameters
SI          1024
SF          125.7677155 MHz
WDW         EM
SSB         0
LB           0 Hz
GB           0
PC           1.40

F1 - Processing parameters
SI          1024
SF          500.1302223 MHz
WDW         EM
SSB         0
LB           0 Hz
GB           0
PC           1.40
```

# HMBC (500 MHz, CDCl<sub>3</sub>)

Chemist Ye Zheng  
YZ884  
HMBC.w CDCl<sub>3</sub> /opt/topspin3.2 YZ 5

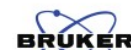

Current Data Parameters  
NAME Apr22-2021  
EXPNO 1  
PROCNO 1  
F2 - Acquisition Parameters  
Date\_ 20210420  
Time 17.39  
INSTRUM spect  
PROBHD 5 mm CBOC-130  
PULPROG zgpg30  
TD 131074  
SOLVENT cdcl3  
NS 8  
DS 4  
SWH 4950.455 Hz  
FIDRES 0.000460 Hz  
AQ 0.1038460 sec  
RG 185.32  
DW 101.000 usec  
DE 40.00 usec  
TE 298.2 K  
CNS2 145.0000000  
CNS3 10.0000000  
D0 0.0000000 sec  
D1 1.4700000 sec  
D2 0.0044628 sec  
D3 0.0000000 sec  
D4 0.0000000 sec  
D5 0.0000000 sec  
===== CHANNEL f1 =====  
NUC1 13C  
P1 9.10 usec  
PL1 0.0000000 W  
===== CHANNEL f2 =====  
NUC2 1H  
P2 9.10 usec  
PL2 0.0000000 W  
===== GRABF2 CHANNEL =====  
CPDPRG2 SHGQ10.100  
CPDPRG3 SHGQ10.100  
CPDPRG4 SHGQ10.100  
CPDPRG5 SHGQ10.100  
CPDPRG6 SHGQ10.100  
CPDPRG7 SHGQ10.100  
CPDPRG8 SHGQ10.100  
CPDPRG9 SHGQ10.100  
CPDPRG10 SHGQ10.100  
===== Acquisition parameters =====  
TD 131074  
FIDRES 0.000460 Hz  
AQ 0.1038460 sec  
RG 185.32  
DW 101.000 usec  
DE 40.00 usec  
TE 298.2 K  
===== Processing parameters =====  
SI 32768  
SF 500.1300233 MHz  
WDW EM  
SSB 0  
LB 0 Hz  
GB 0  
PC 1.40  
===== Processing parameters =====  
SI 131074  
SF 125.757785 MHz  
WDW EM  
SSB 0  
LB 0 Hz  
GB 0

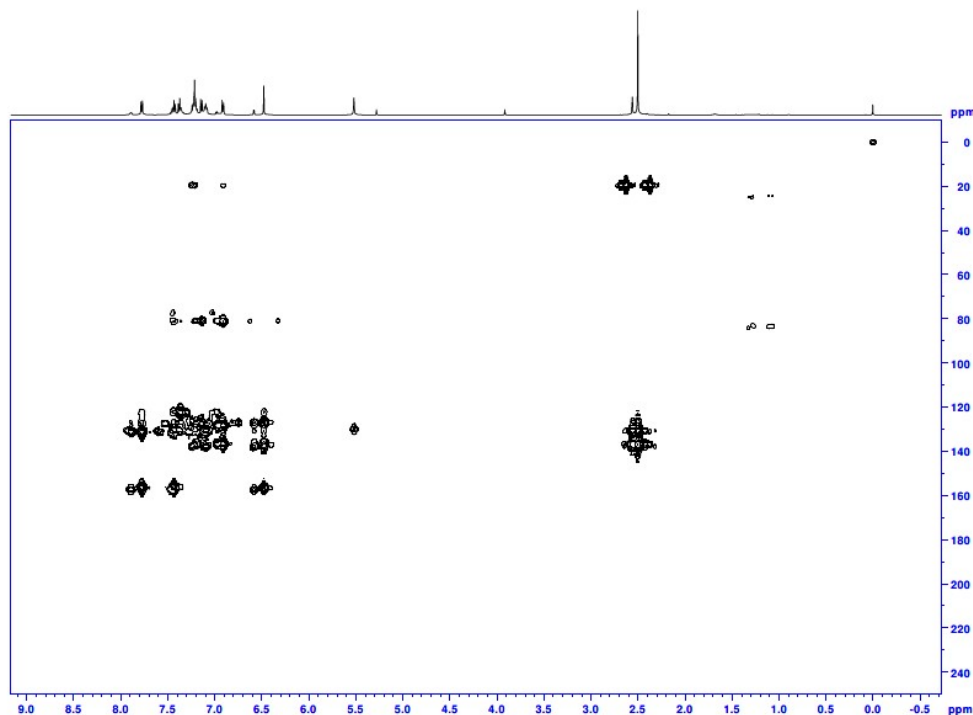

# HPLC of racemic 3-(*o*-Tolyl)benzo[*c*][1,2]oxaborol-1(3*H*)-ol **26**

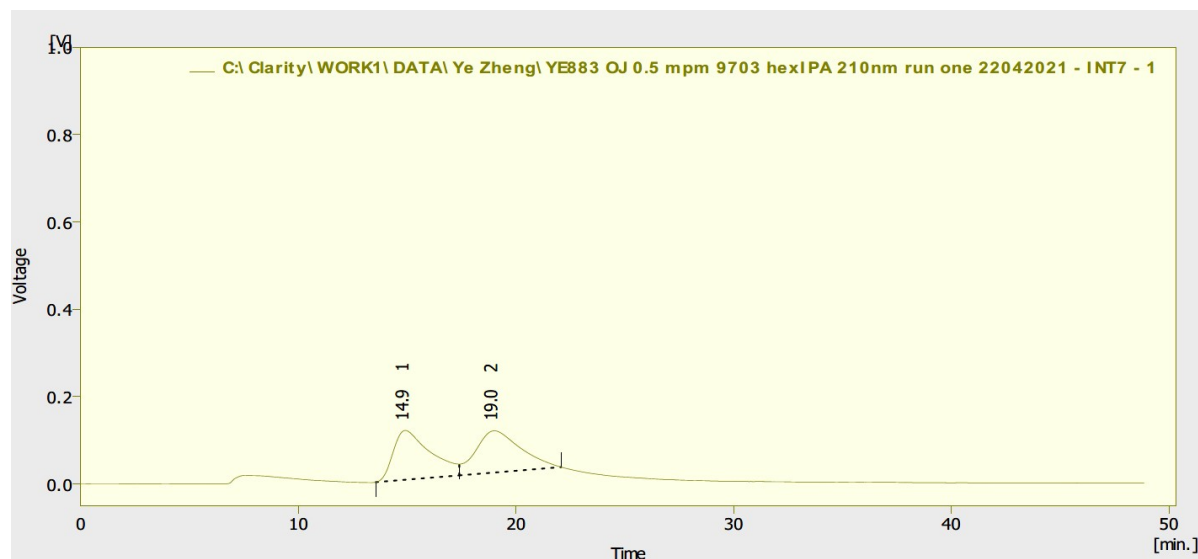

Result Table (Uncal - C:\Clarity\WORK1\DATA\Ye Zheng\YE883 OJ 0.5 mpm 9703 hexIPA 210nm run one 22042021 - INT7 - 1)

|   | Reten. Time<br>[min] | Area<br>[mV.s] | Height<br>[mV] | Area<br>[%] | Height<br>[%] | W05<br>[min] | Compound<br>Name |
|---|----------------------|----------------|----------------|-------------|---------------|--------------|------------------|
| 1 | 14.917               | 13397.934      | 113.066        | 49.4        | 54.2          | 1.97         |                  |
| 2 | 18.993               | 13704.596      | 95.691         | 50.6        | 45.8          | 2.34         |                  |
|   | Total                | 27102.530      | 208.756        | 100.0       | 100.0         |              |                  |

HPLC after ATH of (2-(4,4,5,5-tetramethyl-1,3,2-dioxaborolan-2-yl)phenyl)(*o*-tolyl)methanone using (*R,R*)-3C-tethered Ru(II)-TsDPEN catalyst **2** (after 72 hours, 100% conversion, 6% ee).

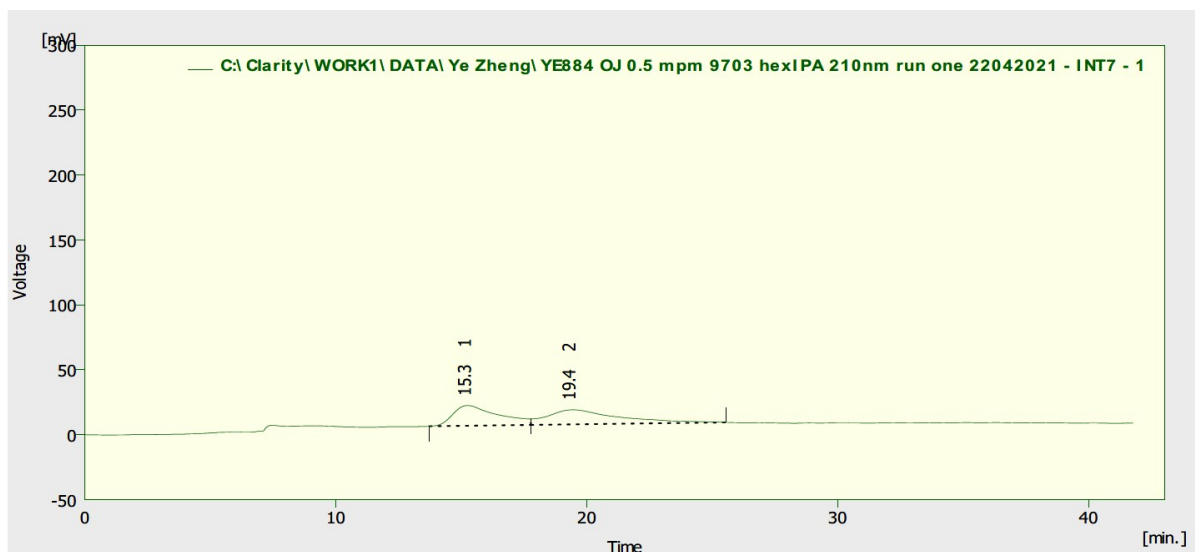

Result Table (Uncal - C:\Clarity\WORK1\DATA\Ye Zheng\YE884 OJ 0.5 mpm 9703 hexIPA 210nm run one 22042021 - INT7 - 1)

|   | Reten. Time<br>[min] | Area<br>[mV.s] | Height<br>[mV] | Area<br>[%] | Height<br>[%] | W05<br>[min] | Compound<br>Name |
|---|----------------------|----------------|----------------|-------------|---------------|--------------|------------------|
| 1 | 15.260               | 1962.019       | 15.618         | 47.0        | 58.1          | 2.03         |                  |
| 2 | 19.420               | 2213.636       | 11.259         | 53.0        | 41.9          | 2.99         |                  |
|   | Total                | 4175.654       | 26.877         | 100.0       | 100.0         |              |                  |

(2-Bromophenyl)(4-methoxyphenyl)methanone.

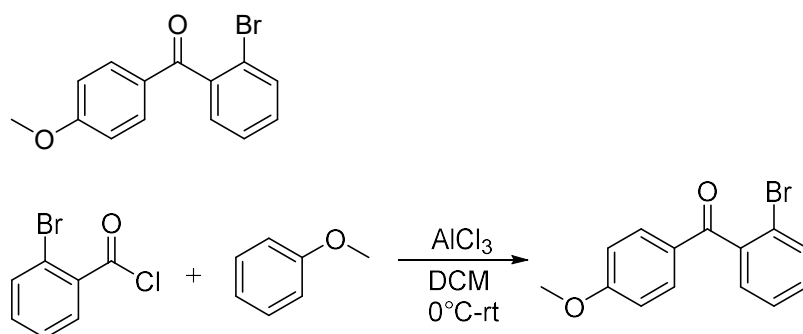

This compound has been reported and fully characterized: F. Ling, H. Hou, J. Chen, S. Nian, X. Yi, Z. Wang, D. Song and W. Zhong, *Org. Lett.* 2019, **21**, 3937-3941.

To a solution of 2-bromobenzoyl chloride (438 mg, 2.00 mmol) was in DCM (10 mL) at  $0^\circ\text{C}$  was added dropwise anisole (281 mg, 2.60 mmol). The reaction mixture was then stirred under a nitrogen atmosphere for 30 minutes, after which  $\text{AlCl}_3$  (319 mg, 2.40 mmol) was added. The reaction mixture was left stirring under the nitrogen atmosphere for 2 hours and followed by TLC (9:1 hexane: EtOAc). The mixture was poured into ice water. DCM (20 mL) was added and the organic layer was separated. The aqueous layer was extracted with DCM ( $3 \times 20$  mL), and the combined organic layers were dried ( $\text{MgSO}_4$ ) and filtered. Solvent was removed to give the crude product. The product was isolated via flash chromatography on silica eluted with 0-20% ethyl acetate in hexane to give (2-bromophenyl)(4-methoxyphenyl)methanone as a white solid (540 mg, 1.86 mmol, 93%).

TLC:  $R_f$  ca 0.50 (9:1 hexane: EtOAc), strong UV and  $\text{KMnO}_4$ ;  $\delta_{\text{H}}$  (400 MHz,  $\text{CDCl}_3$ ) 7.80 (2H, d,  $J = 8.8$ , ArH), 7.64 (1H, d,  $J = 8.0$ , ArH), 7.41 (1H, t,  $J = 7.4$ , ArH), 7.35 (2H, dd,  $J = 12.2, 4.6$ , ArH), 6.95 (2H, d,  $J = 8.8$ , ArH), 3.88 (3H, s,  $\text{CH}_3$ ) ppm;  $\delta_{\text{C}}$  (100 MHz,  $\text{CDCl}_3$ ) 194.49 (C), 164.15 (C), 141.12 (C), 133.10 (CH), 132.67 (CH), 130.85 (CH), 129.12 (C), 128.76 (CH), 127.18 (CH), 119.44 (C), 113.94 (CH), 55.56 ( $\text{CH}_3$ ) ppm;  $m/z$  (ES-API+) 313.0 ( $\text{M}^+ + 23$ , 100%). Data matched that reported.

$^1\text{H}$  NMR (400 MHz,  $\text{CDCl}_3$ )

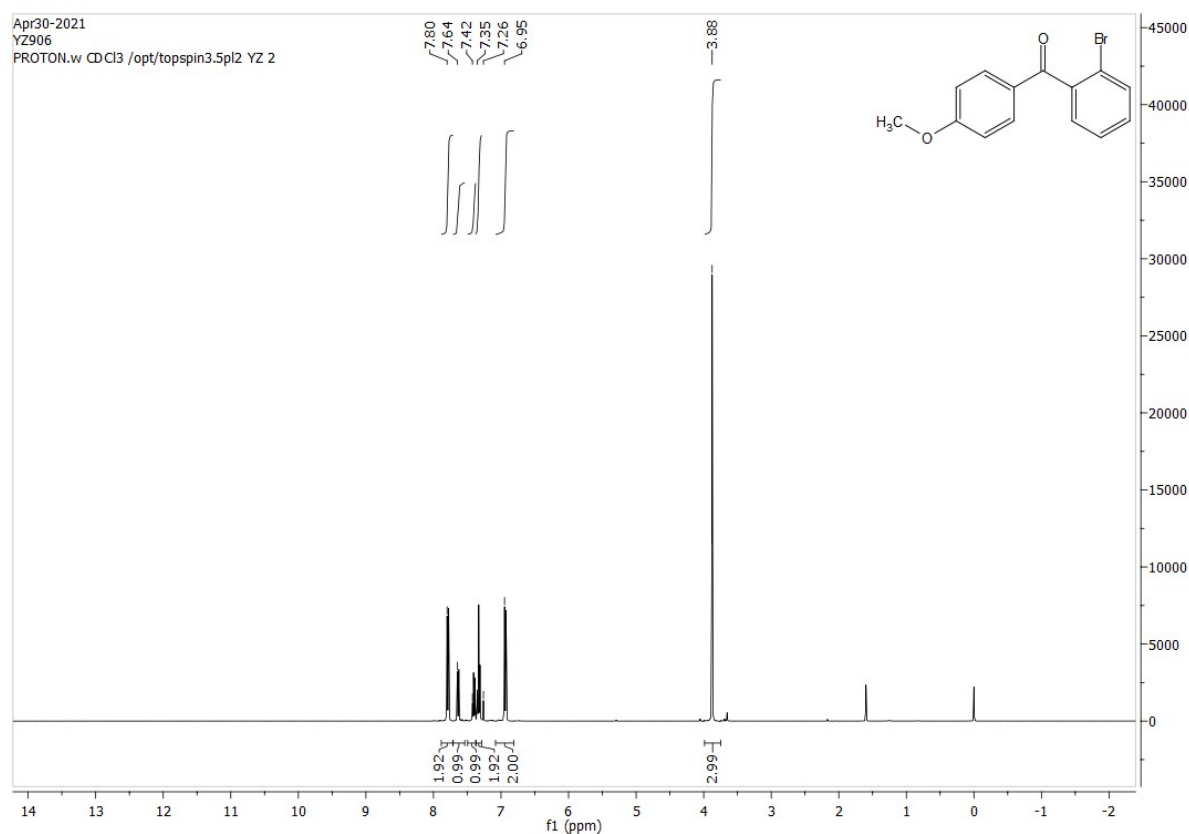

$^{13}\text{C}$  NMR (100 MHz,  $\text{CDCl}_3$ )

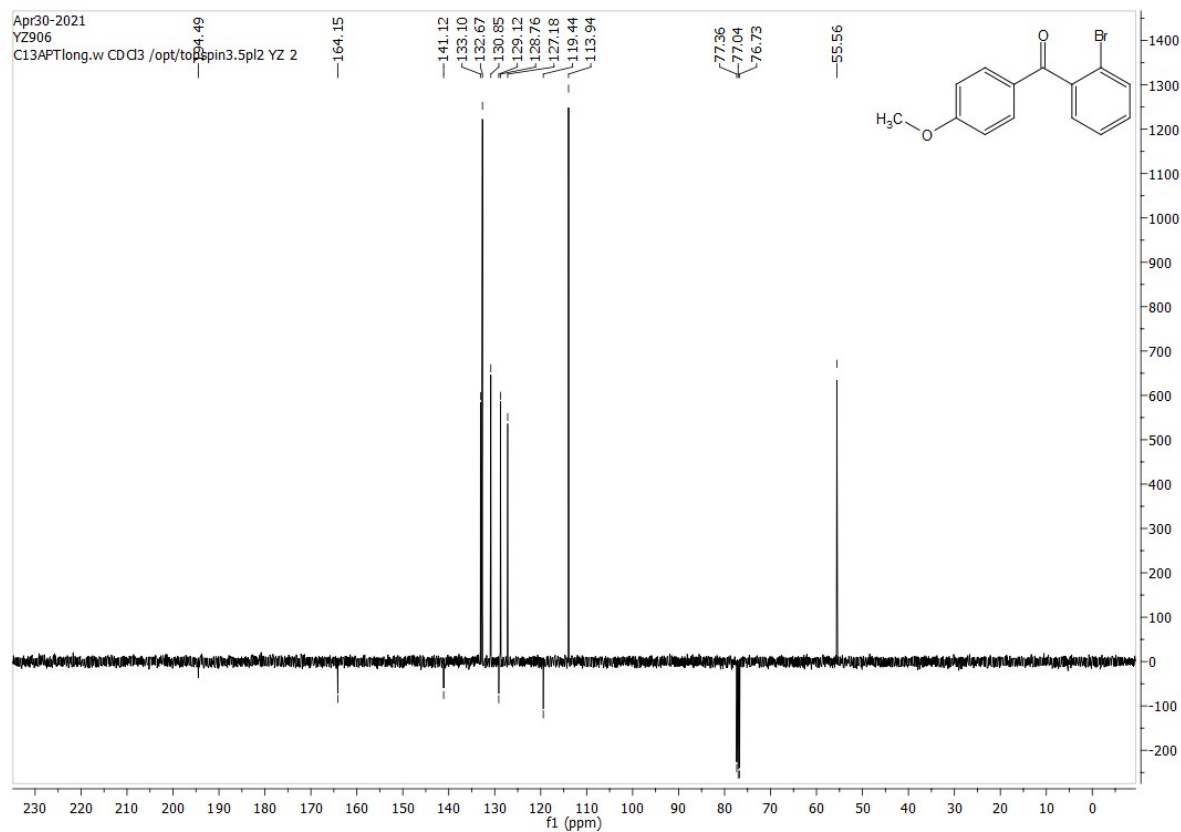



(4-Methoxyphenyl)(2-(4,4,5,5-tetramethyl-1,3,2-dioxaborolan-2-yl)phenyl)methanone.

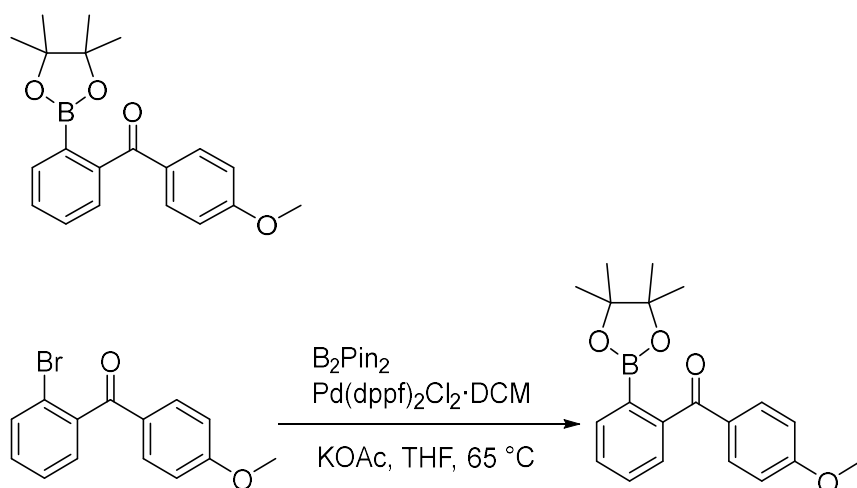

This compound is novel.

A round-bottom flask was charged with (2-bromophenyl)(4-methoxyphenyl)methanone (645 mg, 2.20 mmol), bis(pinacolato)diboron (676 mg, 2.66 mmol), potassium acetate (653 mg, 6.66 mmol), THF (14 mL) and  $Pd(dppf)_2Cl_2 \cdot DCM$  (90.7 mg, 0.111 mmol). The reaction mixture was heated to  $65\text{ }^\circ C$  and left stirring under the nitrogen atmosphere overnight, followed by TLC (9:1 hexane: EtOAc). The mixture was quenched by distilled water (20 mL). EtOAc (20 mL) was added and the organic layer was separated. The aqueous layer was extracted with EtOAc ( $3 \times 20\text{ mL}$ ), and the combined organic layers were dried ( $MgSO_4$ ) and filtered. Solvent was removed to give the crude product. The product was isolated via flash chromatography on silica eluted with 0-10% ethyl acetate in hexane to give (4-methoxyphenyl)(2-(4,4,5,5-tetramethyl-1,3,2-dioxaborolan-2-yl)phenyl)methanone as a yellow oil (367 mg, 1.09 mmol, 49%). TLC:  $R_f$  ca 0.40 (9:1 hexane: EtOAc), strong UV and  $KMnO_4$ ; HRMS: (found (ESI $^+$ ):  $[M+H]^+$ , Calcd for  $C_{20}H_{23}BNaO_4$  361.1579; Found 361.1582; 1.7 ppm error);  $\nu_{max}$  2977, 2933, 1656, 1596, 1563, 1348, 1213, 1114, 1096, 1028, 932, 855, 753  $cm^{-1}$ ;  $\delta_H$  (400 MHz,  $CDCl_3$ ) 7.78-7.73 (3H, m, ArH), 7.52-7.46 (3H, m, ArH), 6.93 (2H, d,  $J = 8.8$ , ArH), 3.86 (3H, s,  $OCH_3$ ), 1.18 (12H, s,  $CH_3$ ) ppm;  $\delta_C$  (100 MHz,  $CDCl_3$ ) 196.95 (C), 163.20 (C), 144.36 (C), 133.87 (CH), 132.39 (CH), 131.10 (C), 129.88 (CH), 129.71 (CH), 128.40 (CH), 113.45 (CH), 83.94 (C), 55.50 ( $CH_3$ ), 24.57 ( $CH_3$ ) ppm;  $m/z$  (ES-API $^+$ ) 361.2 ( $M^+ + 23$ , 100%). Enantiomeric excess and conversion determined by HPLC analysis (Chiralcel IC, 30 cm x 6mm column, hexane:iPrOH 95:5, 1.0 mL/min,  $T = 25^\circ C$ ) ketone 17.1 min, *R* and *S* isomers 4.4 min and 5.9 min, configuration is not confirmed.

$^1\text{H}$  NMR (400 MHz,  $\text{CDCl}_3$ )

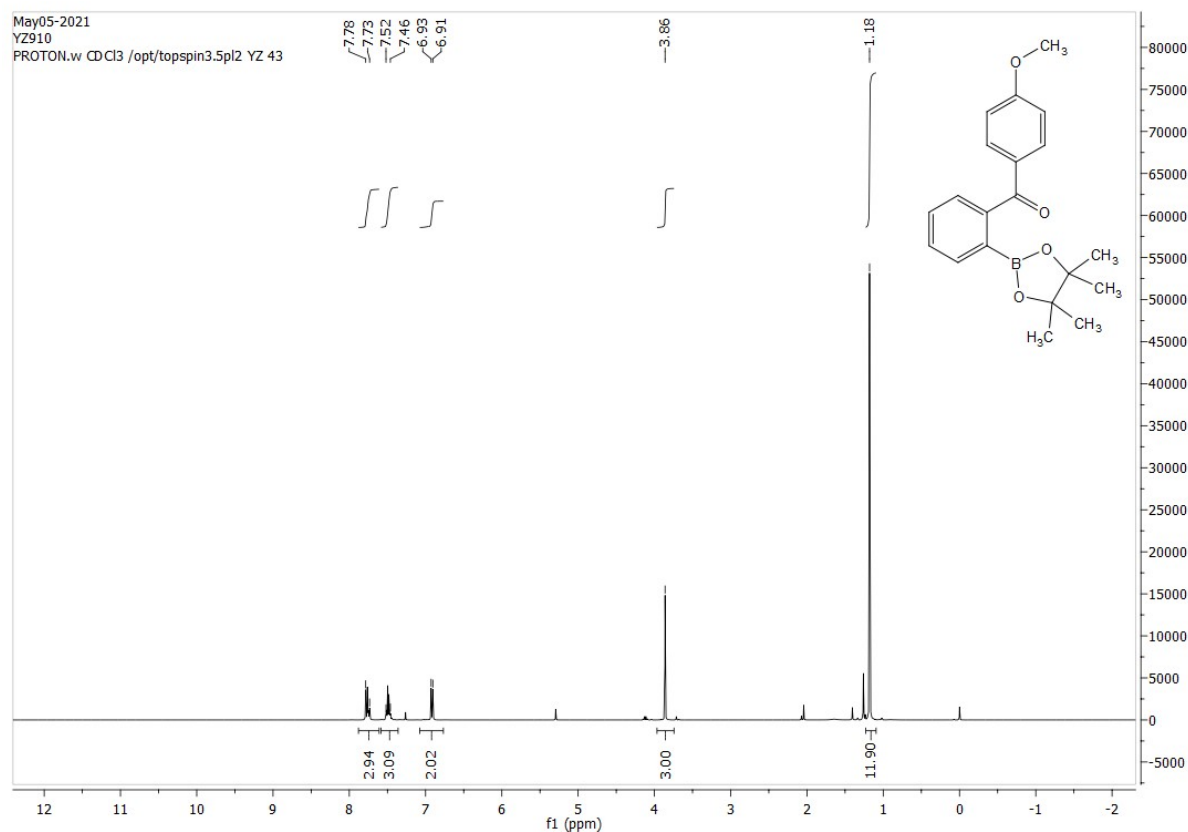

$^{13}\text{C}$  NMR (100 MHz,  $\text{CDCl}_3$ )

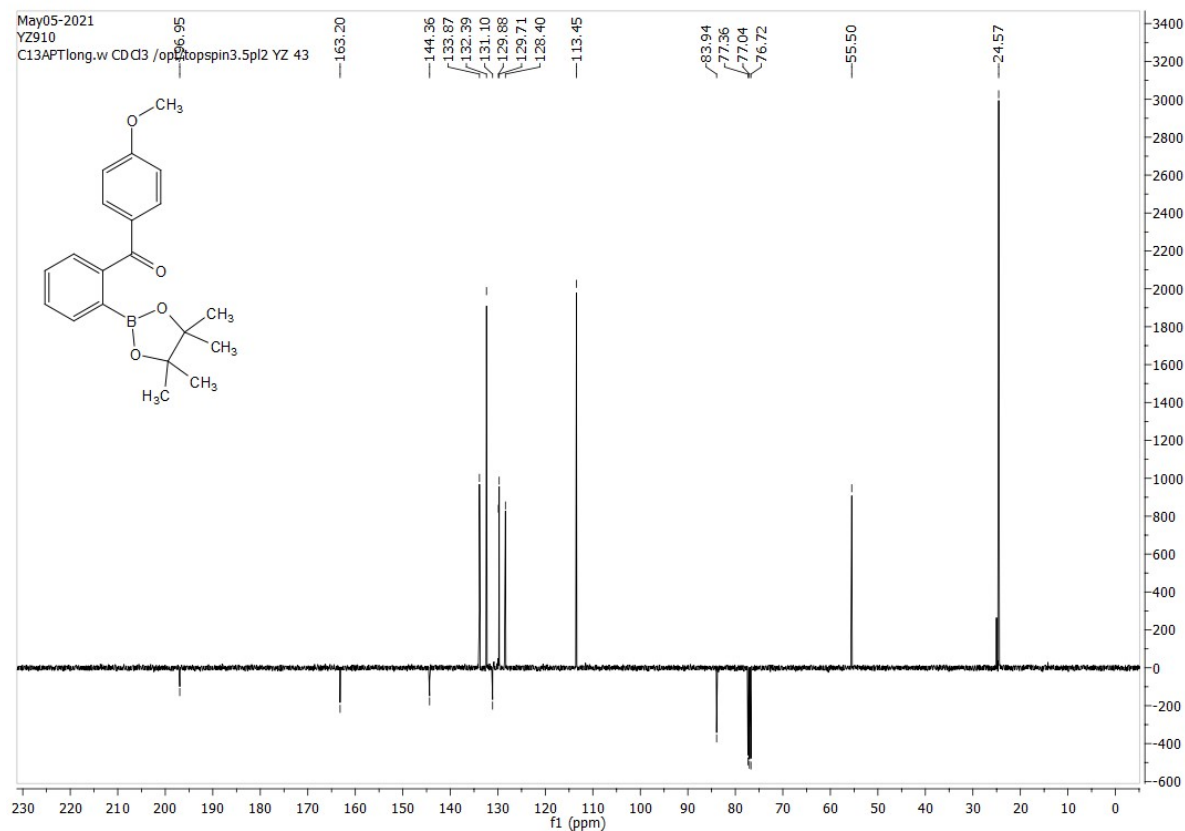

# COSY (400 MHz, CDCl<sub>3</sub>)

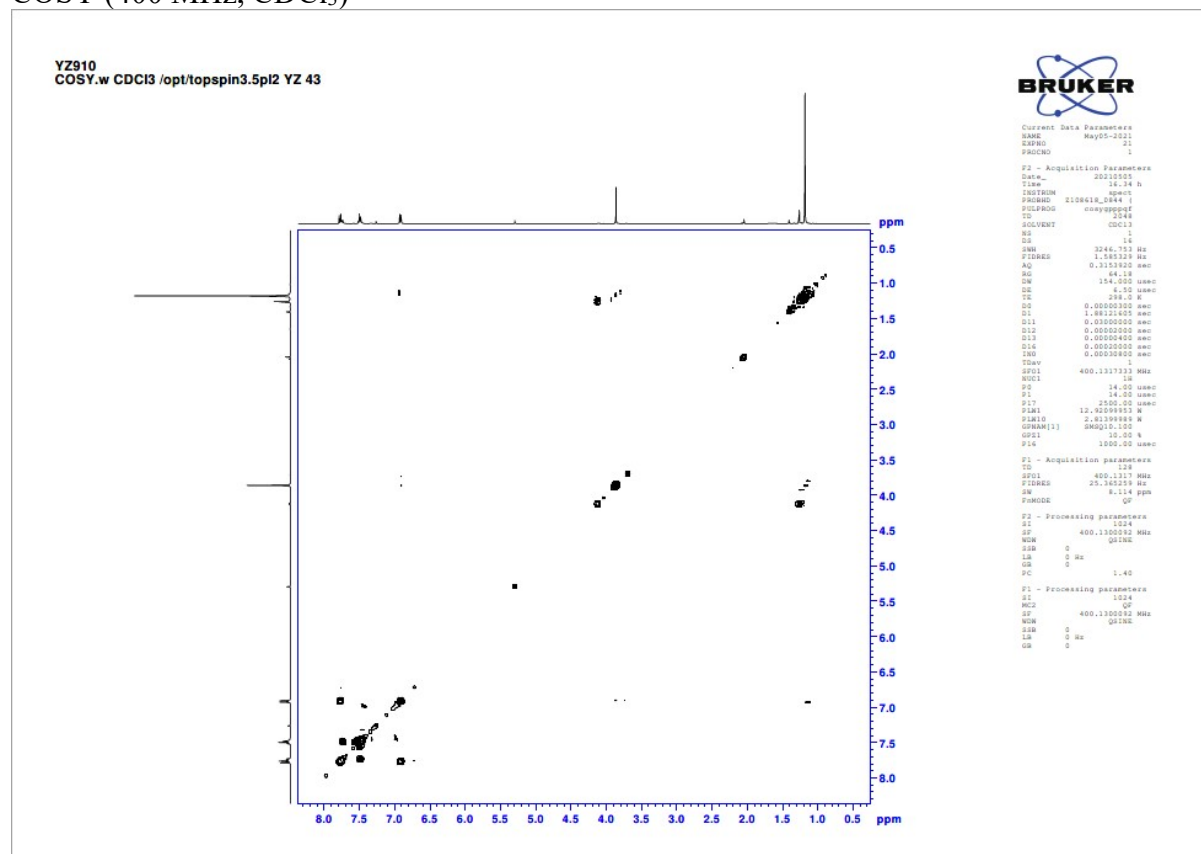

# HSQC (400 MHz, CDCl<sub>3</sub>)

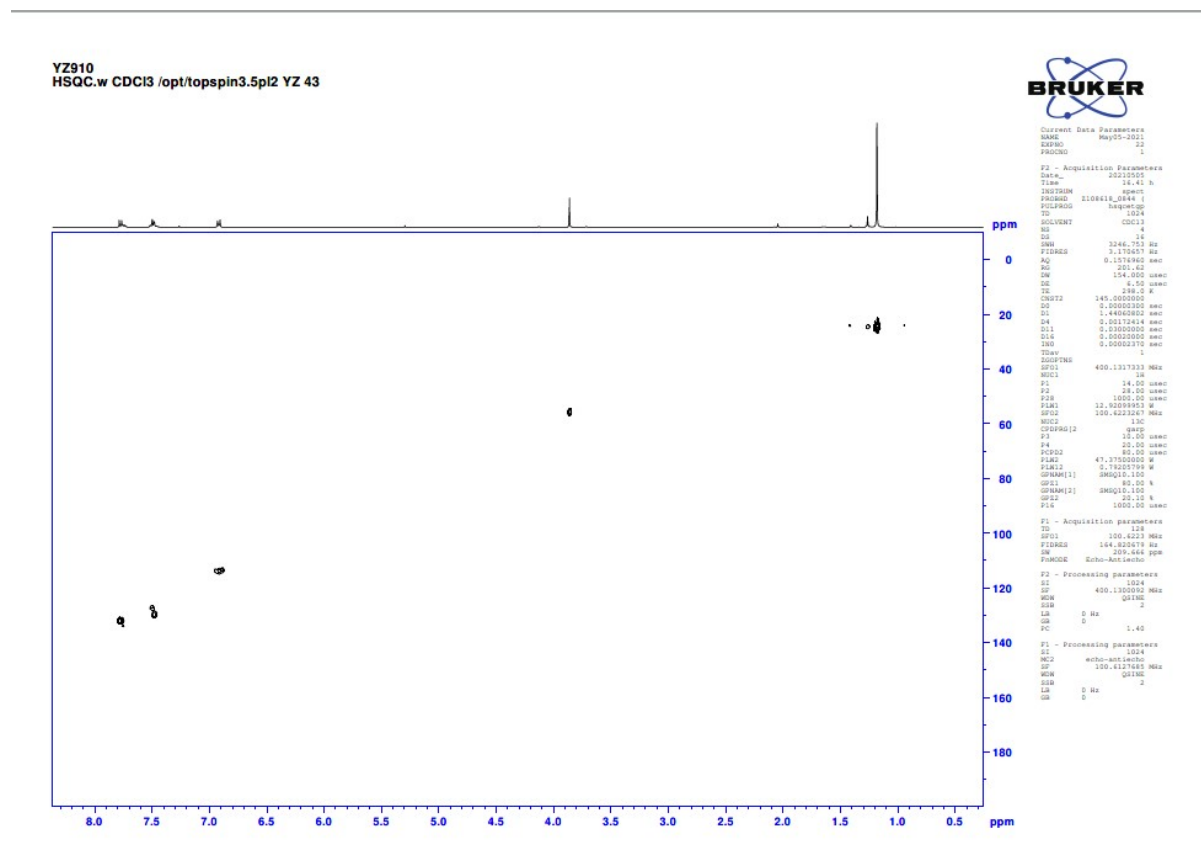

# HMBC (400 MHz, CDCl<sub>3</sub>)

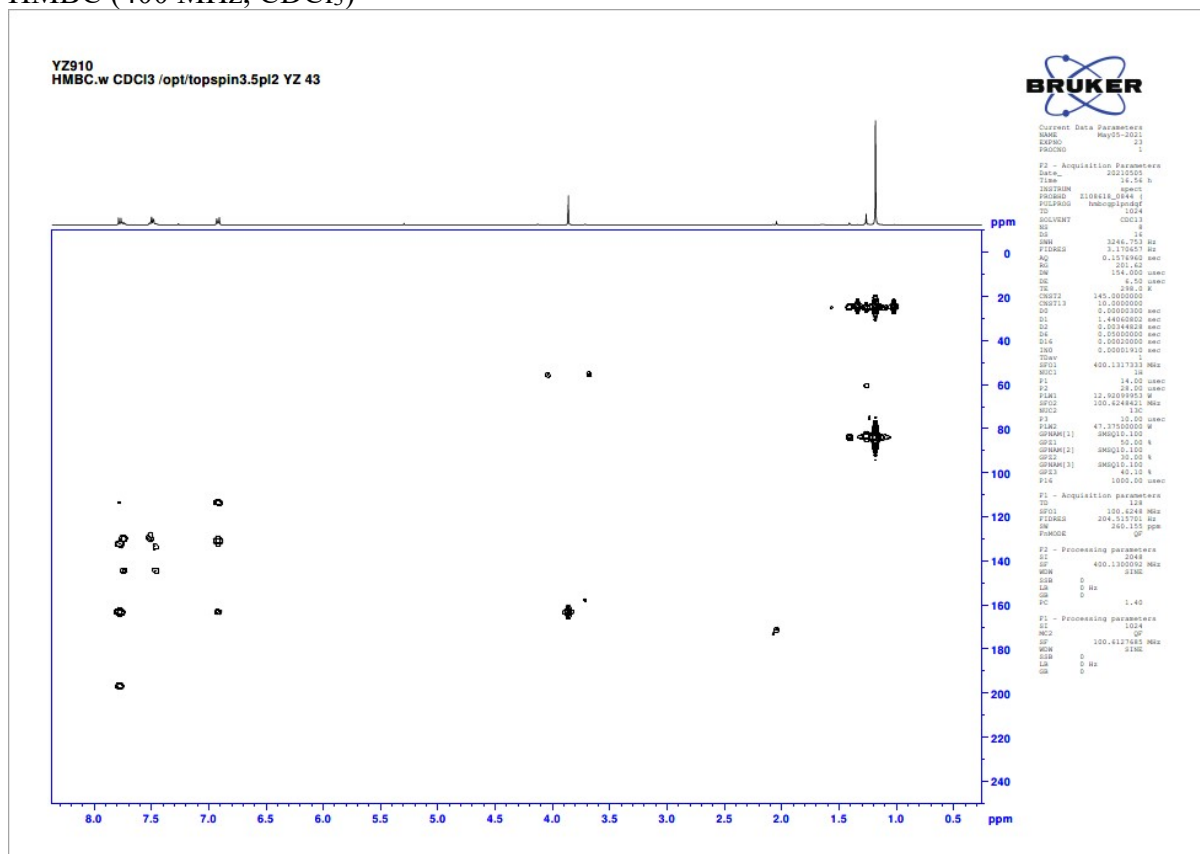

## HPLC of (4-methoxyphenyl)(2-(4,4,5,5-tetramethyl-1,3,2-dioxaborolan-2-yl)phenyl)methanone

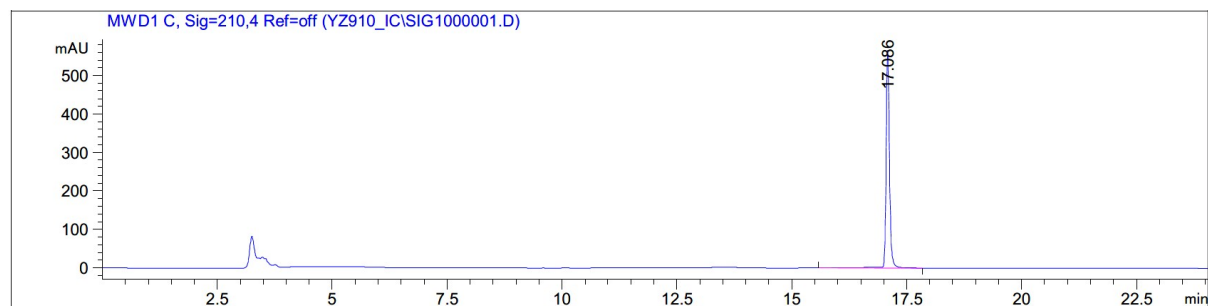

Signal 2: MWD1 C, Sig=210,4 Ref=off

| Peak # | RetTime [min] | Type | Width [min] | Area [mAU*s] | Height [mAU] | Area %   |
|--------|---------------|------|-------------|--------------|--------------|----------|
| 1      | 17.086        | BB   | 0.0782      | 2923.16113   | 566.39697    | 100.0000 |

Totals : 2923.16113 566.39697

3-(4-Methoxyphenyl)benzo[*c*][1,2]oxaborol-1(3*H*)-ol **27**.

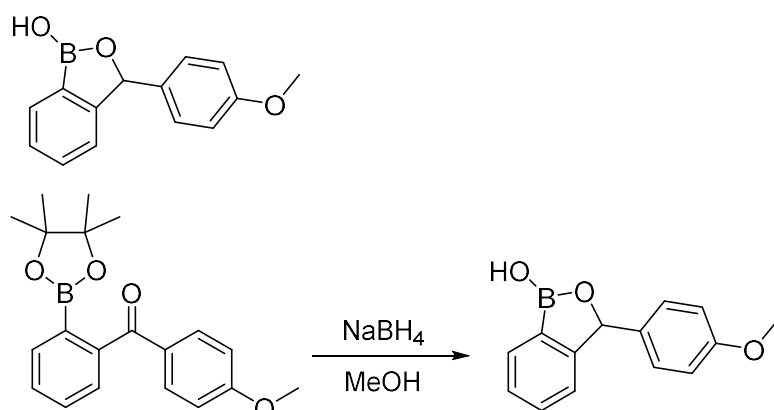

This compound is novel.

To a solution of (4-methoxyphenyl)(2-(4,4,5,5-tetramethyl-1,3,2-dioxaborolan-2-yl)phenyl)methanone (245 mg, 0.725 mmol) in MeOH (4.3 mL) was added sodium borohydride (55.1 mg, 1.45 mmol). The reaction was stirred for 4 hours. TLC (4:1 hexane: EtOAc) after this time indicated full conversion. Distilled water (20 mL) was added, and the mixture was extracted with EtOAc (3 × 20 mL), dried with MgSO<sub>4</sub>.

Solvent was removed to give the crude product. The reaction was followed by TLC (4:1 hexane: EtOAc). The product was isolated via flash chromatography on silica eluted with 0-50% ethyl acetate in hexane to give 3-(4-methoxyphenyl)-benzo[*c*][1,2]oxaborol-1(3*H*)-ol **27** as a white solid (61.6 mg, 0.256 mmol, 35%).

TLC: R<sub>f</sub> ca 0.20 (4:1 hexane: EtOAc), strong UV and KMnO<sub>4</sub>; Mp: 99 °C; HRMS: (found (ESI<sup>+</sup>): [M+H]<sup>+</sup>, Calcd for C<sub>14</sub>H<sub>13</sub>BNaO<sub>3</sub> 263.0857; Found 263.0850; -1.5 ppm error); ν<sub>max</sub> 3358 (br), 1607, 1509, 1476, 1420, 1276, 1254, 1172, 1025, 951, 819, 739 cm<sup>-1</sup>; δ<sub>H</sub> (400 MHz, CDCl<sub>3</sub>) 7.78 (1H, d, *J* = 7.2, ArH), 7.39 (2H, tt, *J* = 16.1, 8.0, ArH), 7.23-7.14 (3H, m, ArH), 6.89 (2H, d, *J* = 8.6, ArH), 6.16 (1H, s, ArCH), 5.66 (1H, s, OH), 3.80 (3H, s, CH<sub>3</sub>) ppm; δ<sub>C</sub> (100 MHz, CDCl<sub>3</sub>) 159.73 (C), 156.81 (C), 132.23 (C), 131.35 (CH), 130.38 (CH), 128.49 (CH), 127.55 (CH), 122.41 (CH), 114.10 (CH), 83.56 (CH), 55.31 (CH<sub>3</sub>) ppm. m/z (ES-API<sup>+</sup>) 263.1 (M<sup>+</sup> + 23, 100%).

Enantiomeric excess and conversion determined by HPLC analysis (Chiralcel IC, 30 cm x 6mm column, hexane:iPrOH 95:5, 1.0 mL/min, T = 25°C) ketone 17.1 min, *R* and *S* isomers 4.4 min and 5.9 min, configuration is not confirmed.

ATH of (4-methoxyphenyl)(2-(4,4,5,5-tetramethyl-1,3,2-dioxaborolan-2-yl)phenyl)methanone.

(*R,R*)-3C-tethered Ru(II)-TsDPEN catalyst **2** (1.66 mg, 0.00267 mmol, 1 mol%) was added to FA: TEA (5:2 azeotropic mixture, 0.41 mL) at rt and the mixture was stirred under a nitrogen inert atmosphere for 10-15 minutes; after which a solution of (4-methoxyphenyl)(2-(4,4,5,5-tetramethyl-1,3,2-dioxaborolan-2-yl)phenyl)methanone (90.0 mg, 0.267 mmol) in DCM (0.56 mL) was added. The reaction mixture was stirred under a nitrogen atmosphere, followed by TLC (4:1 hexane: EtOAc). After 72 hours, the reaction was quenched using saturated NaHCO<sub>3</sub> solution (20 mL). EtOAc (20 mL) was added and the organic layer was separated. The aqueous layer was extracted with EtOAc (3 x 20 mL) and the combined organic layers were dried (MgSO<sub>4</sub>) and filtered. The solvent was removed to give the crude product. The product was isolated via flash chromatography on silica eluted with 0-50% ethyl acetate in hexane to give 3-(4-methoxyphenyl)benzo[*c*][1,2]oxaborol-1(3*H*)-ol **27** (25.0 mg, 0.104 mmol, 88%). The reaction was also followed by HPLC analysis (Chiralcel IC, 30 cm x 6mm column, hexane:iPrOH 95:5, 1.0 mL/min, T = 25°C): 100% conversion; [ $\alpha$ ]<sub>D</sub><sup>25</sup> +2.79 (c 0.179 in CHCl<sub>3</sub>) 23% ee

A control reaction in the absence of catalyst was carried out:

A solution of (4-methoxyphenyl)(2-(4,4,5,5-tetramethyl-1,3,2-dioxaborolan-2-yl)phenyl)methanone (90.0 mg, 0.267 mmol) in DCM (0.56 mL) was added to FA: TEA (5:2 azeotropic mixture, 0.41 mL) at rt. The reaction mixture was stirred under a nitrogen atmosphere, followed by TLC (4:1 hexane: EtOAc). After 24 hours, the reaction was quenched using saturated NaHCO<sub>3</sub> solution (20 mL). EtOAc (20 mL) was added and the organic layer was separated. The aqueous layer was extracted with EtOAc (3 x 20 mL) and the combined organic layers were dried (MgSO<sub>4</sub>) and filtered. The solvent was removed to give the crude product. NMR indicated that no product was formed.

$^1\text{H}$  NMR (400 MHz,  $\text{CDCl}_3$ )

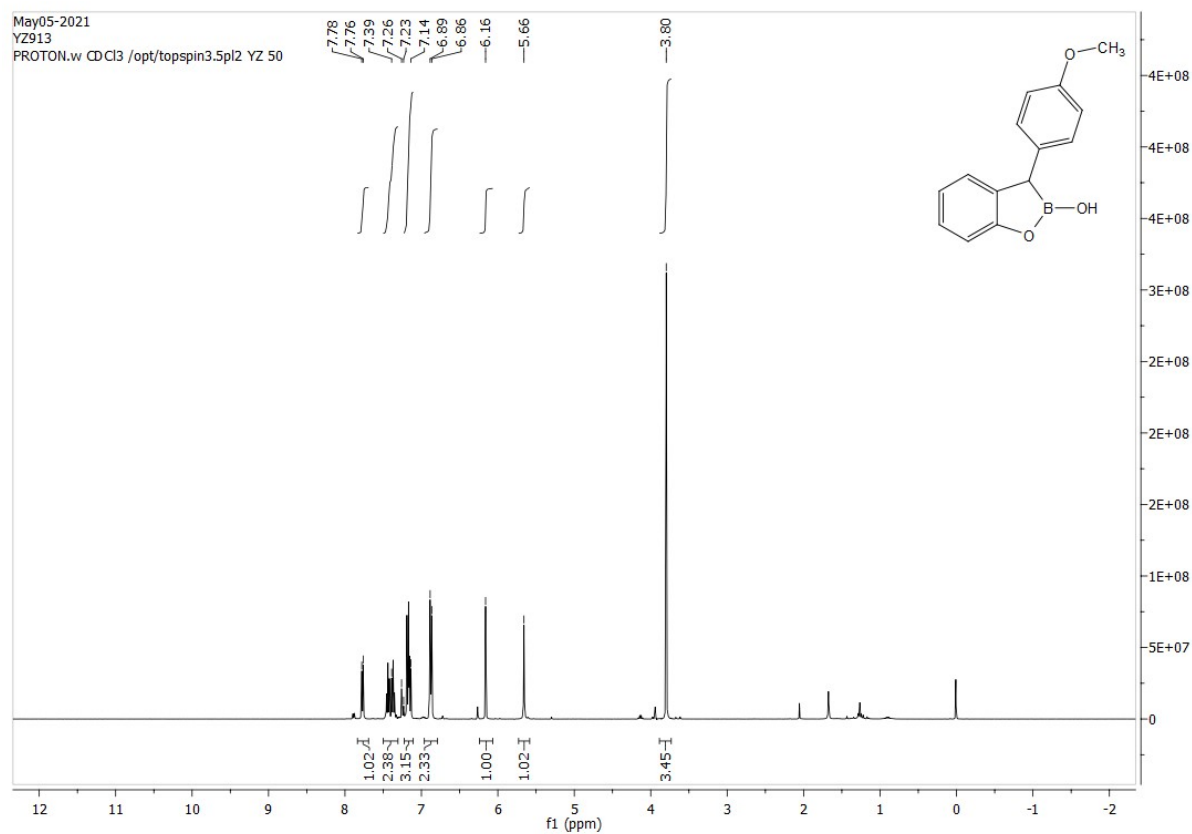

$^{13}\text{C}$  NMR (100 MHz,  $\text{CDCl}_3$ )

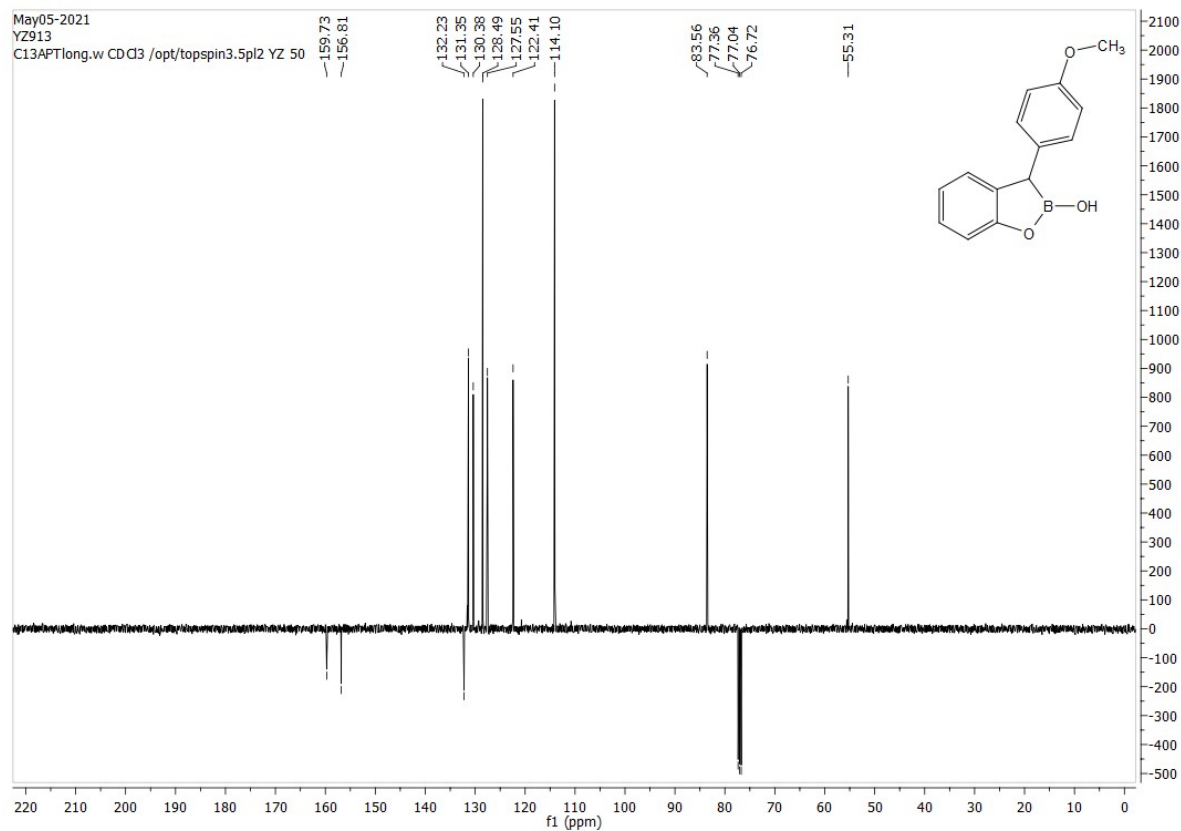

## COSY (400 MHz, CDCl<sub>3</sub>)

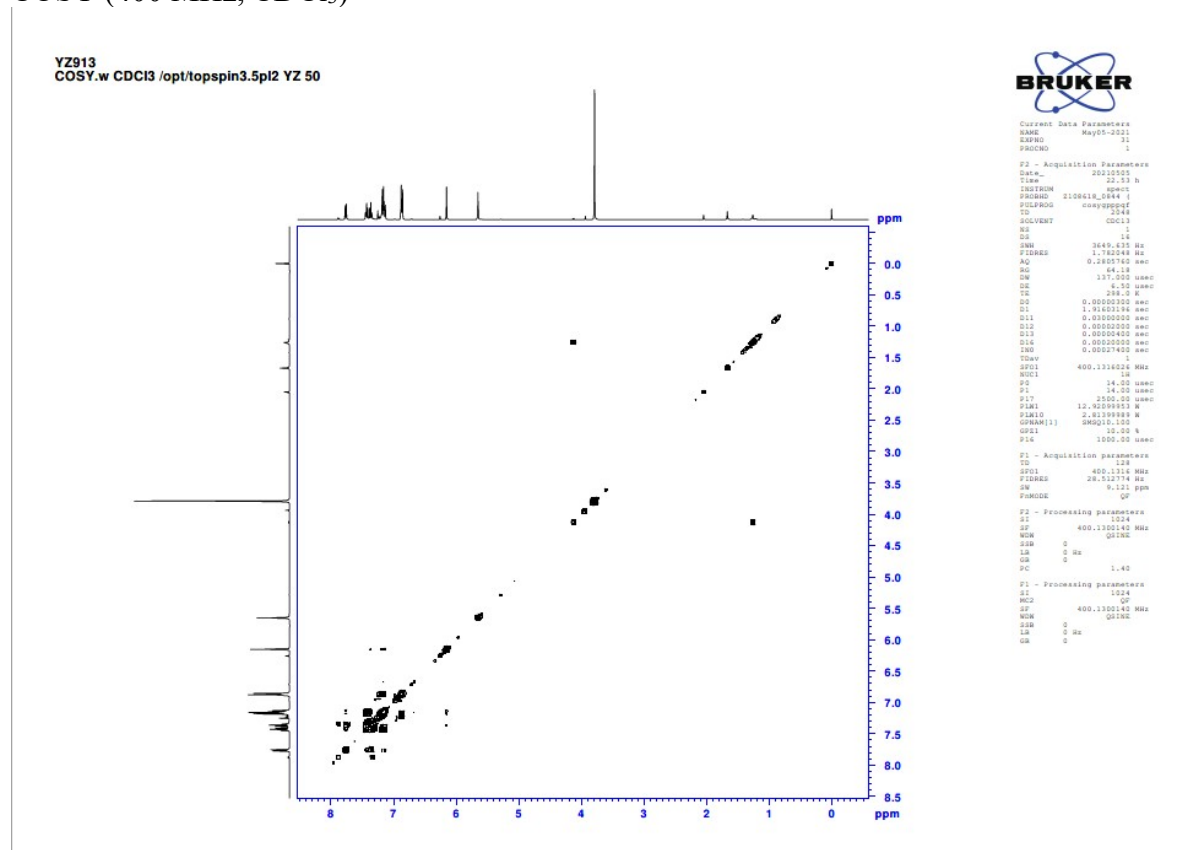

## HSQC (400 MHz, CDCl<sub>3</sub>)

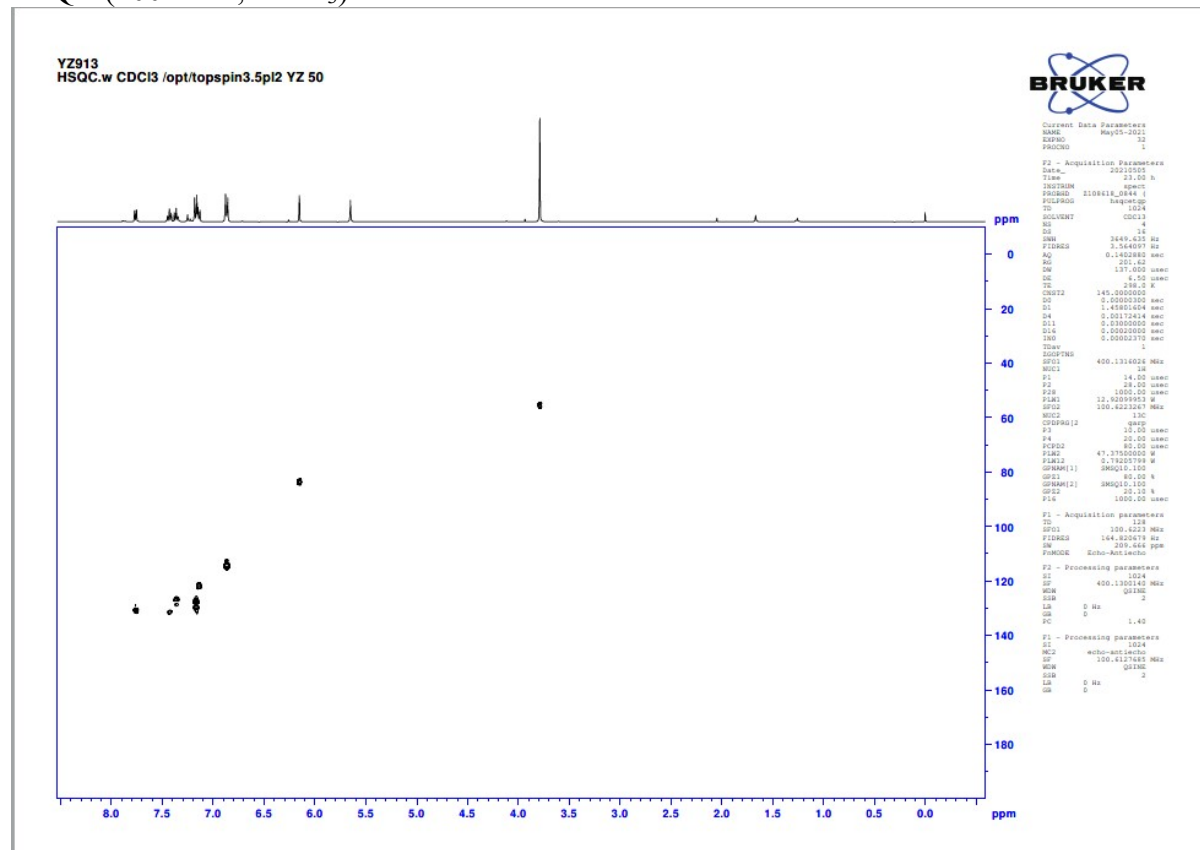



YZ913  
HMBC.w CDCI3 /opt/topspin3.5pl2 YZ 50

Current Data Parameters  
NAME YZ913-001  
EXPNO 31  
PROCNO 1

F2 - Acquisition Parameters  
Date\_ 20210505  
Time 23:15 N  
INSTRUM spect  
PROBHD Z108618\_0044\_1  
PULPROG hmcgpprog4  
PC 10.4  
FIDRES 0.0013  
AQ 0.0013

NUC1 13C  
NUC2 1H  
P1 16.00 usec  
P2 12.00 usec  
P3 12.00 usec  
P4 12.00 usec  
P5 12.00 usec  
P6 12.00 usec  
P7 12.00 usec  
P8 12.00 usec  
P9 12.00 usec  
P10 12.00 usec  
P11 12.00 usec  
P12 12.00 usec  
P13 12.00 usec  
P14 12.00 usec  
P15 12.00 usec  
P16 12.00 usec  
P17 12.00 usec  
P18 12.00 usec  
P19 12.00 usec  
P20 12.00 usec  
P21 12.00 usec  
P22 12.00 usec  
P23 12.00 usec  
P24 12.00 usec  
P25 12.00 usec  
P26 12.00 usec  
P27 12.00 usec  
P28 12.00 usec  
P29 12.00 usec  
P30 12.00 usec  
P31 12.00 usec  
P32 12.00 usec  
P33 12.00 usec  
P34 12.00 usec  
P35 12.00 usec  
P36 12.00 usec  
P37 12.00 usec  
P38 12.00 usec  
P39 12.00 usec  
P40 12.00 usec  
P41 12.00 usec  
P42 12.00 usec  
P43 12.00 usec  
P44 12.00 usec  
P45 12.00 usec  
P46 12.00 usec  
P47 12.00 usec  
P48 12.00 usec  
P49 12.00 usec  
P50 12.00 usec  
P51 12.00 usec  
P52 12.00 usec  
P53 12.00 usec  
P54 12.00 usec  
P55 12.00 usec  
P56 12.00 usec  
P57 12.00 usec  
P58 12.00 usec  
P59 12.00 usec  
P60 12.00 usec  
P61 12.00 usec  
P62 12.00 usec  
P63 12.00 usec  
P64 12.00 usec  
P65 12.00 usec  
P66 12.00 usec  
P67 12.00 usec  
P68 12.00 usec  
P69 12.00 usec  
P70 12.00 usec  
P71 12.00 usec  
P72 12.00 usec  
P73 12.00 usec  
P74 12.00 usec  
P75 12.00 usec  
P76 12.00 usec  
P77 12.00 usec  
P78 12.00 usec  
P79 12.00 usec  
P80 12.00 usec  
P81 12.00 usec  
P82 12.00 usec  
P83 12.00 usec  
P84 12.00 usec  
P85 12.00 usec  
P86 12.00 usec  
P87 12.00 usec  
P88 12.00 usec  
P89 12.00 usec  
P90 12.00 usec  
P91 12.00 usec  
P92 12.00 usec  
P93 12.00 usec  
P94 12.00 usec  
P95 12.00 usec  
P96 12.00 usec  
P97 12.00 usec  
P98 12.00 usec  
P99 12.00 usec  
P100 12.00 usec  
P101 12.00 usec  
P102 12.00 usec  
P103 12.00 usec  
P104 12.00 usec  
P105 12.00 usec  
P106 12.00 usec  
P107 12.00 usec  
P108 12.00 usec  
P109 12.00 usec  
P110 12.00 usec  
P111 12.00 usec  
P112 12.00 usec  
P113 12.00 usec  
P114 12.00 usec  
P115 12.00 usec  
P116 12.00 usec  
P117 12.00 usec  
P118 12.00 usec  
P119 12.00 usec  
P120 12.00 usec  
P121 12.00 usec  
P122 12.00 usec  
P123 12.00 usec  
P124 12.00 usec  
P125 12.00 usec  
P126 12.00 usec  
P127 12.00 usec  
P128 12.00 usec  
P129 12.00 usec  
P130 12.00 usec  
P131 12.00 usec  
P132 12.00 usec  
P133 12.00 usec  
P134 12.00 usec  
P135 12.00 usec  
P136 12.00 usec  
P137 12.00 usec  
P138 12.00 usec  
P139 12.00 usec  
P140 12.00 usec  
P141 12.00 usec  
P142 12.00 usec  
P143 12.00 usec  
P144 12.00 usec  
P145 12.00 usec  
P146 12.00 usec  
P147 12.00 usec  
P148 12.00 usec  
P149 12.00 usec  
P150 12.00 usec  
P151 12.00 usec  
P152 12.00 usec  
P153 12.00 usec  
P154 12.00 usec  
P155 12.00 usec  
P156 12.00 usec  
P157 12.00 usec  
P158 12.00 usec  
P159 12.00 usec  
P160 12.00 usec  
P161 12.00 usec  
P162 12.00 usec  
P163 12.00 usec  
P164 12.00 usec  
P165 12.00 usec  
P166 12.00 usec  
P167 12.00 usec  
P168 12.00 usec  
P169 12.00 usec  
P170 12.00 usec  
P171 12.00 usec  
P172 12.00 usec  
P173 12.00 usec  
P174 12.00 usec  
P175 12.00 usec  
P176 12.00 usec  
P177 12.00 usec  
P178 12.00 usec  
P179 12.00 usec  
P180 12.00 usec  
P181 12.00 usec  
P182 12.00 usec  
P183 12.00 usec  
P184 12.00 usec  
P185 12.00 usec  
P186 12.00 usec  
P187 12.00 usec  
P188 12.00 usec  
P189 12.00 usec  
P190 12.00 usec  
P191 12.00 usec  
P192 12.00 usec  
P193 12.00 usec  
P194 12.00 usec  
P195 12.00 usec  
P196 12.00 usec  
P197 12.00 usec  
P198 12.00 usec  
P199 12.00 usec  
P200 12.00 usec  
P201 12.00 usec  
P202 12.00 usec  
P203 12.00 usec  
P204 12.00 usec  
P205 12.00 usec  
P206 12.00 usec  
P207 12.00 usec  
P208 12.00 usec  
P209 12.00 usec  
P210 12.00 usec  
P211 12.00 usec  
P212 12.00 usec  
P213 12.00 usec  
P214 12.00 usec  
P215 12.00 usec  
P216 12.00 usec  
P217 12.00 usec  
P218 12.00 usec  
P219 12.00 usec  
P220 12.00 usec  
P221 12.00 usec  
P222 12.00 usec  
P223 12.00 usec  
P224 12.00 usec  
P225 12.00 usec  
P226 12.00 usec  
P227 12.00 usec  
P228 12.00 usec  
P229 12.00 usec  
P230 12.00 usec  
P231 12.00 usec  
P232 12.00 usec  
P233 12.00 usec  
P234 12.00 usec  
P235 12.00 usec  
P236 12.00 usec  
P237 12.00 usec  
P238 12.00 usec  
P239 12.00 usec  
P240 12.00 usec  
P241 12.00 usec  
P242 12.00 usec  
P243 12.00 usec  
P244 12.00 usec  
P245 12.00 usec  
P246 12.00 usec  
P247 12.00 usec  
P248 12.00 usec  
P249 12.00 usec  
P250 12.00 usec  
P251 12.00 usec  
P252 12.00 usec  
P253 12.00 usec  
P254 12.00 usec  
P255 12.00 usec  
P256 12.00 usec  
P257 12.00 usec  
P258 12.00 usec  
P259 12.00 usec  
P260 12.00 usec  
P261 12.00 usec  
P262 12.00 usec  
P263 12.00 usec  
P264 12.00 usec  
P265 12.00 usec  
P266 12.00 usec  
P267 12.00 usec  
P268 12.00 usec  
P269 12.00 usec  
P270 12.00 usec  
P271 12.00 usec  
P272 12.00 usec  
P273 12.00 usec  
P274 12.00 usec  
P275 12.00 usec  
P276 12.00 usec

MWD1 C, Sig=210,4 Ref=off (YZ913\_IC\_2\SIG1000001.D)

Chromatogram showing two peaks at retention times 4.354 and 5.758 minutes. The y-axis is labeled mAU and ranges from 0 to 1000. The x-axis is labeled 'min' and ranges from 0 to 30.

| Peak # | RetTime [min] | Type | Width [min] | Area [mAU*s] | Height [mAU] | Area %  |
|--------|---------------|------|-------------|--------------|--------------|---------|
| 1      | 4.354         | BB   | 0.2994      | 2.44836e4    | 1203.34912   | 51.3163 |
| 2      | 5.758         | BB   | 0.3099      | 2.32276e4    | 1168.52063   | 48.6837 |

S189

HPLC after ATH of (4-methoxyphenyl)(2-(4,4,5,5-tetramethyl-1,3,2-dioxaborolan-2-yl)phenyl)methanone using (*R,R*)-3C-tethered Ru(II)-TsDPEN catalyst **2** (after 72 hours, 100% conversion, 23% ee).

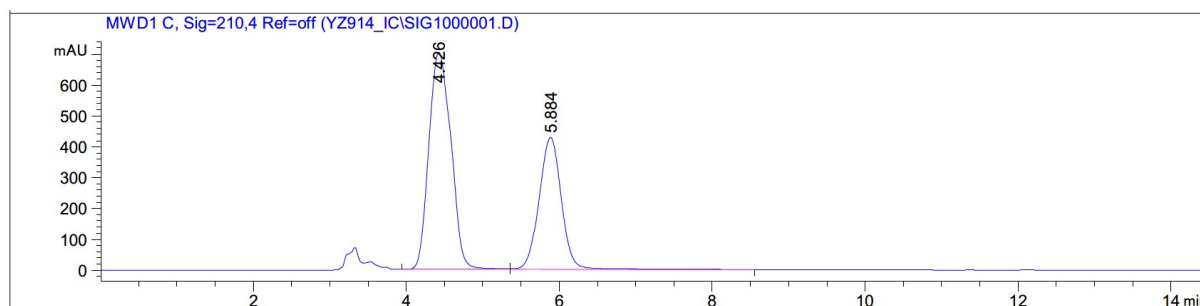

Signal 2: MWD1 C, Sig=210,4 Ref=off

| Peak # | RetTime [min] | Type | Width [min] | Area [mAU*s] | Height [mAU] | Area %  |
|--------|---------------|------|-------------|--------------|--------------|---------|
| 1      | 4.426         | BV   | 0.2986      | 1.40280e4    | 703.47296    | 61.4937 |
| 2      | 5.884         | VB   | 0.3174      | 8784.09668   | 427.98706    | 38.5063 |

Totals : 2.28121e4 1131.46002

**(2-Bromophenyl)(furan-2-yl)methanol.**

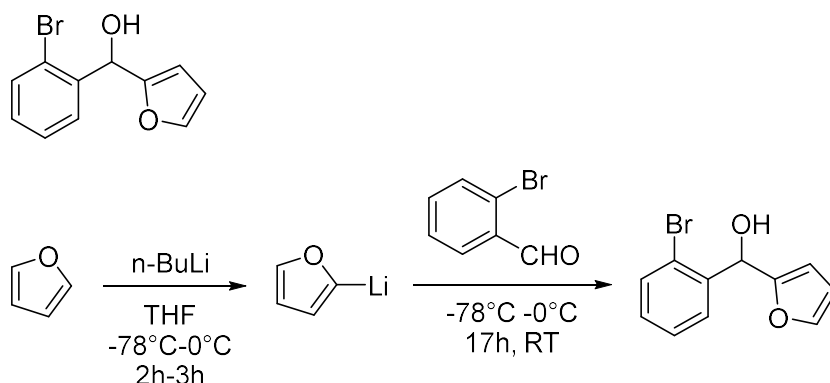

This compound has been reported and fully characterized: M. Tang, Y. Kong, B. Chu and D. Feng, *Adv. Synth. Catal.* 2016, **358**, 926-939.

To a solution of furan (374 mg, 5.50 mmol) in THF (10 mL) at -78 °C was added dropwise a solution of n-butyllithium (1.70 mL, 2.5M in hexanes, 4.25 mmol). The reaction mixture was then stirred under a nitrogen atmosphere for 2 hours, after which 2-bromobenzaldehyde (638 mg, 3.45 mmol) was added dropwise. The reaction mixture was left stirring under the nitrogen atmosphere and allowed to warm to rt. The reaction was followed by TLC (9:1 hexane: ethyl acetate). The mixture was quenched by saturated NH<sub>4</sub>Cl solution (20 mL). EtOAc (20 mL) was added and the organic layer was separated. The aqueous layer was extracted with EtOAc (3 × 20 mL), and the combined organic layers were dried (MgSO<sub>4</sub>) and filtered. Solvent was removed to give the crude product. The product was isolated via flash chromatography on silica eluted with 0-50% ethyl acetate in hexane to give (2-bromophenyl)(furan-2-yl)methanol as a yellow oil (860 mg, 3.43 mmol, 99%). TLC: R<sub>f</sub> ca 0.30 (9:1 hexane: EtOAc), strong UV and KMnO<sub>4</sub>; δ<sub>H</sub> (400 MHz, CDCl<sub>3</sub>) 7.69 (1H, d, *J* = 7.7, ArH), 7.56 (1H, d, *J* = 8.0, ArH), 7.40-7.36 (2H, m, ArH), 7.19 (1H, t, *J* = 7.6, H in furan), 6.32 (1H, s, H in furan), 6.19 (1H, d, *J* = 4.1, H in furan), 6.08 (1H, d, *J* = 4.0, ArCHOH), 2.56 (1H, d, *J* = 4.0, ArCHOH) ppm; δ<sub>C</sub> (100 MHz, CDCl<sub>3</sub>) 154.45 (C), 142.72 (CH), 139.81 (C), 132.77 (CH), 129.50 (CH), 128.37 (CH), 127.71 (CH), 122.59 (C), 110.38 (CH), 108.15 (CH), 69.10 (CH) ppm; *m/z* (ES-API+) 274.9 (M<sup>+</sup> + 23, 100%). Data matched that reported.

$^1\text{H}$  NMR (400 MHz,  $\text{CDCl}_3$ )

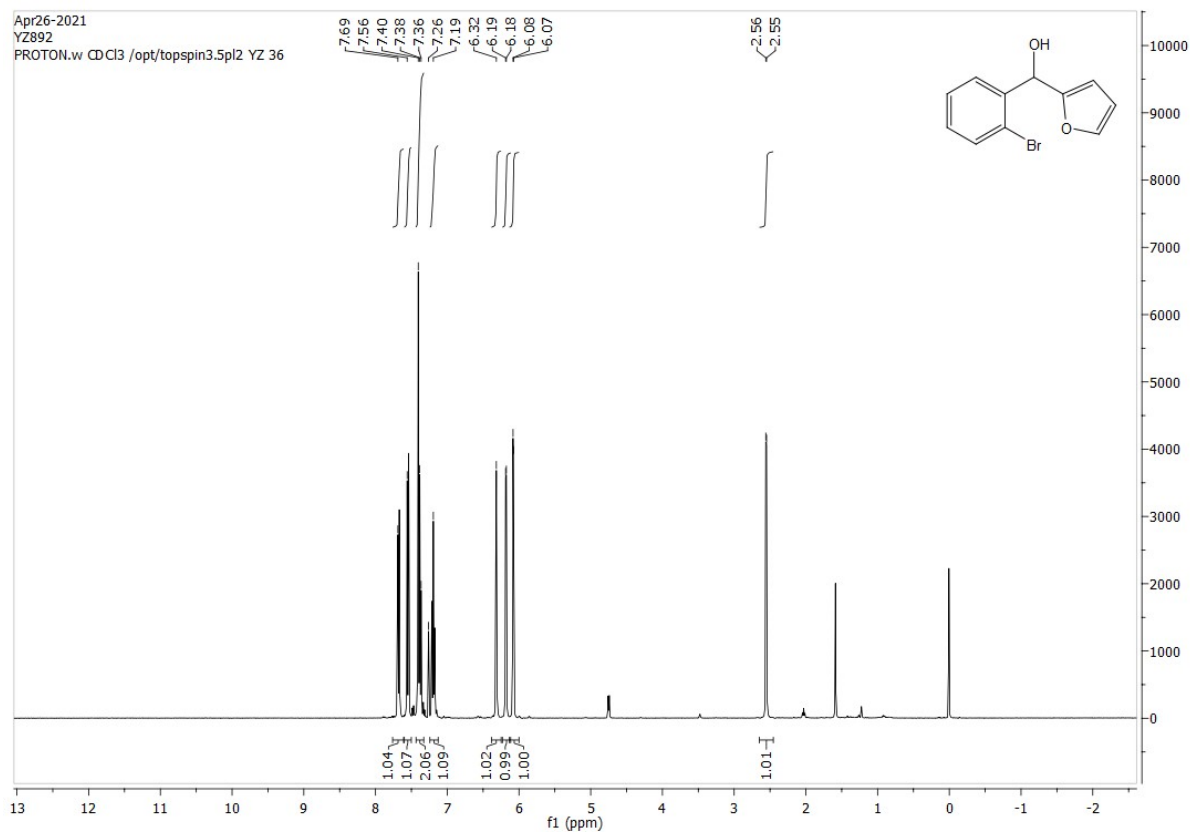

$^{13}\text{C}$  NMR (100 MHz,  $\text{CDCl}_3$ )

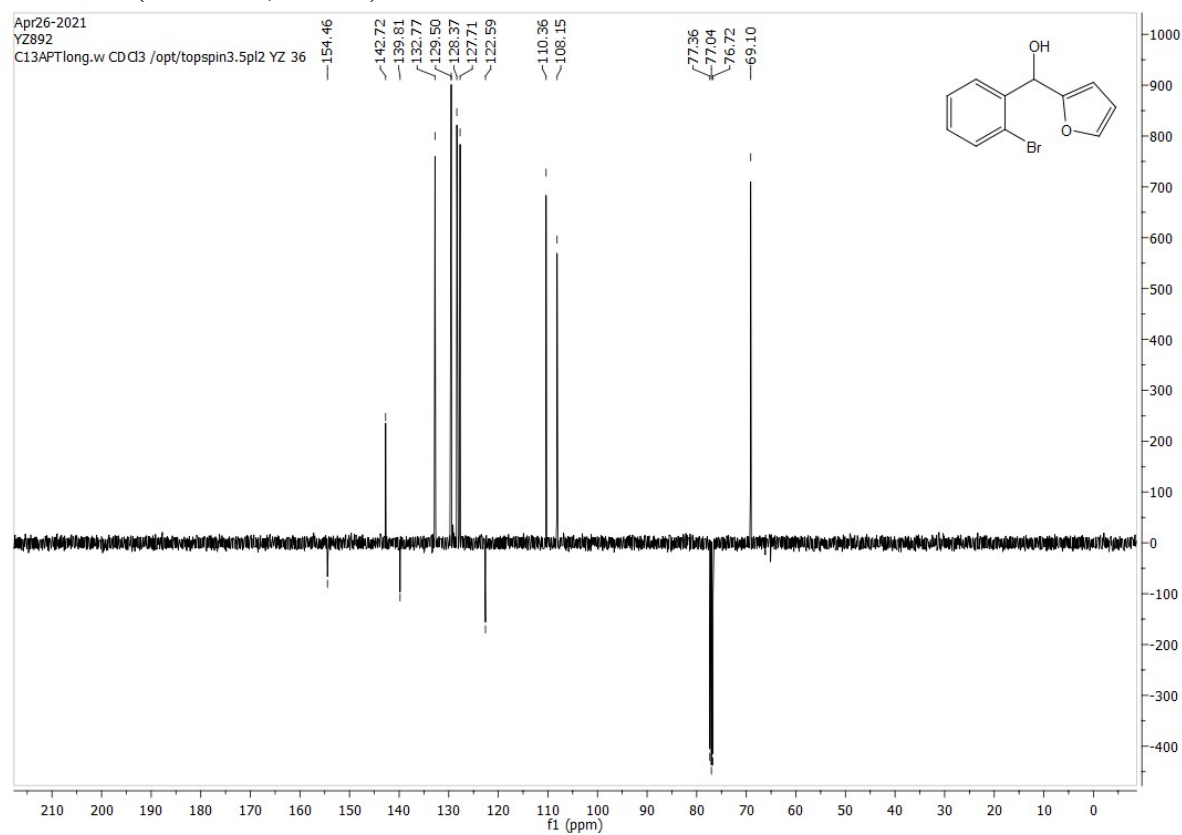

**(2-Bromophenyl)(furan-2-yl)methanone.**

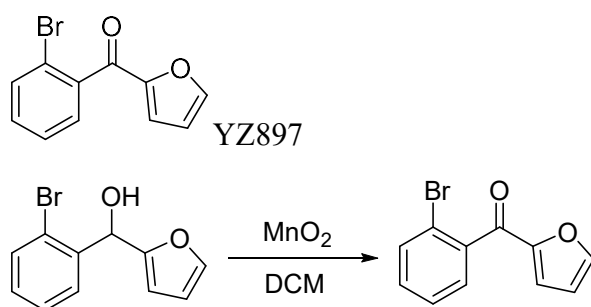

This compound has been reported but not fully characterized: M. Tang, Y. Kong, B. Chu and D. Feng, *Adv. Synth. Catal.* 2016, **358**, 926-939.

To a solution of (2-bromophenyl)(furan-2-yl)methanol (860 mg, 3.43 mmol) in DCM (23 mL) at rt was added manganese dioxide (4.48 g, 51.5 mmol). The reaction mixture was left to stir under a nitrogen atmosphere overnight. TLC (9:1 hexane: EtOAc) after this time indicated full conversion. The solids were removed by gravity filtration and washed with DCM. The combined solvent was removed to give the product as a colorless oil (363 mg, 1.46 mmol, 43%). TLC: R<sub>f</sub> ca 0.50 (9:1 hexane: EtOAc), strong UV and KMnO<sub>4</sub>; HRMS: (found (ESI<sup>+</sup>): [M+Na]<sup>+</sup>, Calcd for C<sub>11</sub>H<sub>7</sub><sup>79</sup>BrNaO<sub>2</sub> 272.9501; Found 272.9495; -2.4 ppm error); ν<sub>max</sub> 3130, 1652, 1561, 1457, 1390, 1298, 1150, 1018, 956, 743, 68 cm<sup>-1</sup>; δ<sub>H</sub> (400 MHz, CDCl<sub>3</sub>) 7.69 (2H, dd, *J* = 18.3, 4.2, ArH), 7.44-7.33 (3H, m, H in furan + ArH), 7.04 (1H, d, *J* = 3.6, H in furan), 6.57 (1H, dd, *J* = 3.5, 1.2, H in furan) ppm; δ<sub>C</sub> (100 MHz, CDCl<sub>3</sub>) 182.71 (C), 151.79 (C), 148.07 (CH), 139.51 (C), 133.42 (CH), 131.61 (CH), 129.13 (CH), 127.10 (CH), 121.69 (CH), 119.88 (C), 112.65 (CH) ppm; m/z (ES-API<sup>+</sup>) 272.9 (M<sup>+</sup> + 23, 100%).

$^1\text{H}$  NMR (400 MHz,  $\text{CDCl}_3$ )

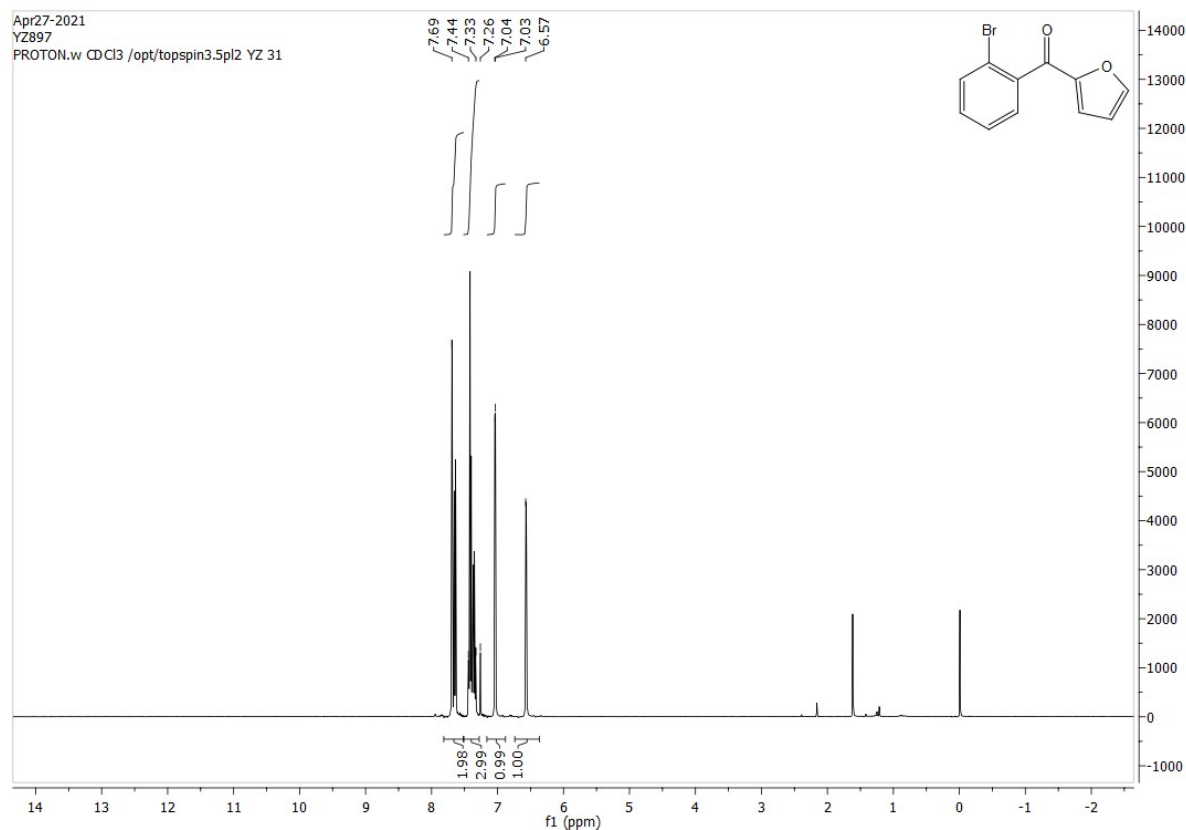

$^{13}\text{C}$  NMR (100 MHz,  $\text{CDCl}_3$ )

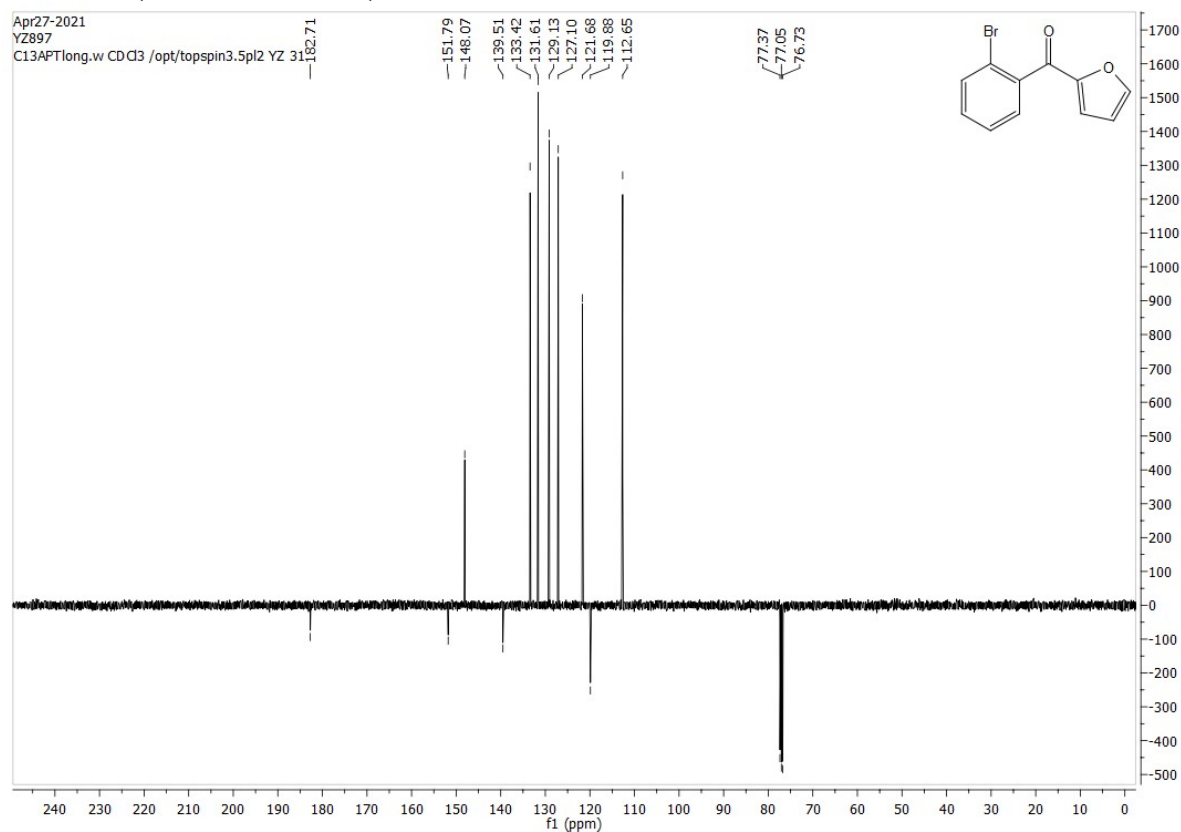

YZ897  
COSY.w CDC13 /opt/topspin3.5pl2 YZ 31

Current Data Parameters  
NAME Apr7-2021  
EXPRO 41  
PROCNO 1

F2 - Acquisition Parameters  
Date\_ 20210427  
Time 21.14 h  
INSTRUM spect  
PROBHD Z106418\_ZS41  
PULPROG zgpg30  
TD 65536  
SOLVENT CDC13  
NS 16  
DS 14  
SWH 3676.471 Hz  
FIDRES 1.795152 Hz  
AQ 0.2785280 sec  
RG 64.18  
DW 136.500 usec  
DE 4.10 usec  
TE 300.2 K  
D0 0.0000000 sec  
D1 1.9180797 sec  
D11 0.0300000 sec  
D12 0.0000000 sec  
D13 0.0000400 sec  
D14 0.0000000 sec  
DRO 0.0002700 sec  
TDSP 1  
SFO1 400.1315416 MHz  
NUC1 1H  
P0 14.00 usec  
P1 14.00 usec  
P17 2550.00 usec  
P1810 12.42599513 s  
P1815 2.8109988 s  
GPRM(1) SMOUL 1.20  
OP1 10.00 s  
P14 1600.00 usec

F1 - Acquisition parameters  
SFO1 400.13154 MHz  
FIDRES 28.72427 Hz  
SW 9.184 ppm  
P0MODE QF

F2 - Processing parameters  
SI 3274  
SF 400.1300712 MHz  
WDW QF  
SS 0  
LB 0 Hz  
GB 0  
PC 1.40

F1 - Processing parameters  
SI 1024  
SF 400.1300712 MHz  
WDW QF  
SS 0  
LB 0 Hz  
GB 0  
PC 1.40

YZ897  
HSQC.w CDCI3 /opt/topspin3.5pl2 YZ 31

Current Data Parameters  
NAME: YZ897  
EXPNO: 42  
PROCNO: 1

F2 - Acquisition Parameters  
Date\_: 20221212  
Time: 22:42 h  
INSTRUM: spect  
PROBHD: EBOB1H-5mm  
PULPROG: zgpg30  
SOLVENT: cdcl3

RG: 1  
SD: 4  
SWH: 3876.471 Hz  
F2RES: 0.130240 Hz  
AQ: 0.130240 sec  
RG: 255.42  
SW: 138.000 usec  
DE: 6.50 usec  
TE: 300.2 K  
CSTRT: 145.0000000  
DO: 0.0000300 sec  
AL: 1.4750400 sec  
DA: 0.0012414 sec  
S1: 0.0000000 sec  
S14: 0.0000000 sec  
S16: 0.0000237 sec

TD: 65536  
SFOFMS: 400.131954 MHz  
NUC1: 13C  
P1: 14.00 usec  
P2: 28.00 usec  
P3: 1000.00 usec  
P1M1: 12.9209953 MHz  
SFO1: 100.6212417 MHz  
NUC2: 1H  
CPOBPG2: zgpg2  
P4: 30.00 usec  
P5: 20.00 usec  
PCPD2: 47.3750000 MHz  
P1M2: 5.7007979 MHz  
SFO2: 500.1360491 MHz  
SFO1M2: 500.1360491 MHz  
P6: 10.00 usec  
P7: 1000.00 usec

F1 - Acquisition parameters  
TD: 132  
SFO1: 100.6212417 MHz  
F2RES: 100.6212417 Hz  
SW: 205.464 ppm  
PULPROG: zgpg30

F2 - Processing parameters  
SI: 1024  
SF: 400.1319571 MHz  
WDW: gauss  
SSB: 0  
LB: 0 Hz  
GB: 0  
PC: 1.40

F1 - Processing parameters  
SI: 1024  
MC2: echo-ant-echo  
SF: 100.6127683 MHz  
WDW: gauss  
SSB: 0  
LB: 0 Hz  
GB: 0

YZ897  
HMBC.w CDCI3 /opt/topspin3.5pl2 YZ 31

Current Data Parameters  
NAME Apr17-2021  
EXPNO 43  
PROCNO 1

F2 - Acquisition Parameters  
Date\_ 20210417  
Time 21:58 h  
PROBHD 5mm QNP1H  
PULPROG zgpg30  
TD 1024  
AQ 0.00000000  
RG 327.62  
IN 136.000 usec  
DE 4.50 usec  
TE 300.2 K  
CMT2 145.00000000  
CMT13 10.00000000  
DS 0.00000000 usec  
D2 0.00344928 usec  
D4 0.00000000 usec  
D14 0.00000000 usec  
TMS 0.00001912 usec  
TD0 400.131816 Mhz  
NUC1 13  
P1 14.00 usec  
P2 28.00 usec  
PL1 12.92099901 W  
PL2 100.424941 Mhz  
NUC2 13C  
P3 16.00 usec  
P4 47.37020000 Mhz  
GPM1 50.00 A  
GPM2 50.00 A  
GPM3 50.00 A  
P14 100.00 usec

F1 - Acquisition parameters  
TD 128  
FIDRES 100.6248 Mhz  
AQ 204.51701 Mhz  
RG 360.153 ppm  
FWDEN 0

F2 - Processing parameters  
SI 32768  
SF 400.130267 Mhz  
WDW 0  
SSB 0 Mhz  
LB 0  
GB 0  
PC 1.40

F1 - Processing parameters  
SI 1024  
SF 100.612785 Mhz  
WDW 0  
SSB 0 Mhz  
LB 0  
GB 0



Furan-2-yl(2-(4,4,5,5-tetramethyl-1,3,2-dioxaborolan-2-yl)phenyl)methanone.

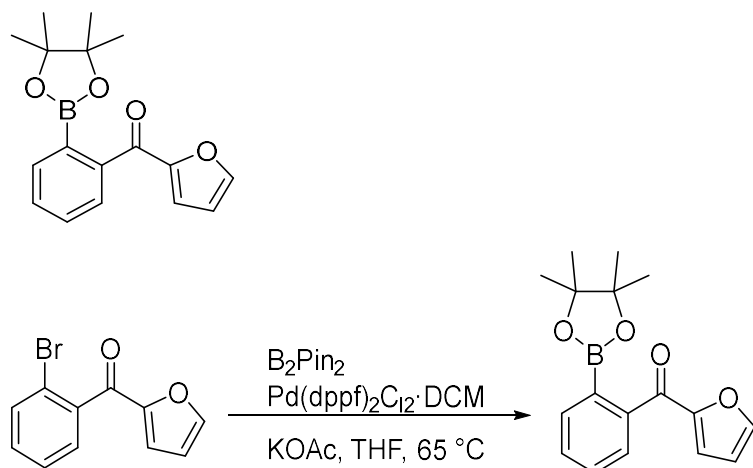

This compound is novel.

A round-bottom flask was charged with (2-bromophenyl)(furan-2-yl)methanone (560 mg, 2.25 mmol), bis(pinacolato)diboron (686 mg, 2.70 mmol), potassium acetate (662 mg, 6.75 mmol), THF (14 mL) and  $Pd(dppf)_2Cl_2 \cdot DCM$  (92.3 mg, 0.113 mmol). The reaction mixture was heated to 65 °C and left stirring under the nitrogen atmosphere overnight, followed by TLC (4:1 hexane: EtOAc). The mixture was quenched by distilled water (20 mL). EtOAc (20 mL) was added and the organic layer was separated. The aqueous layer was extracted with EtOAc (3 × 20 mL), and the combined organic layers were dried ( $MgSO_4$ ) and filtered. Solvent was removed to give the crude product. The product was isolated via flash chromatography on silica eluted with 0-10% ethyl acetate in hexane to give furan-2-yl(2-(4,4,5,5-tetramethyl-1,3,2-dioxaborolan-2-yl)phenyl)methanone as a yellow oil (228 mg, 0.765 mmol, 34%). TLC:  $R_f$  ca 0.20 (4:1 hexane: EtOAc), strong UV and  $KMnO_4$ ; HRMS: (found (ESI+):  $[M+H]^+$ , Calcd for  $C_{17}H_{19}BNaO_4$  321.1267; Found 321.1269; 1.5 ppm error);  $\nu_{max}$  2978, 1653, 1564, 1462, 1346, 1304, 1143, 1037  $cm^{-1}$ ;  $\delta_H$  (500 MHz,  $CDCl_3$ ) 7.78 (1H, d,  $J = 7.3$ , ArH), 7.73 (1H, d,  $J = 8.0$ , ArH), 7.67 (1H, d,  $J = 0.9$ , ArH), 7.54-7.47 (2H, m, ArH + H in furan), 7.05 (1H, d,  $J = 3.5$ , H in furan), 6.54 (1H, dd,  $J = 3.5$ , 1.7, H in furan), 1.26 (12H, s,  $CH_3$ ) ppm;  $\delta_C$  (125 MHz,  $CDCl_3$ ) 184.51 (C), 152.84 (C), 146.93 (CH), 142.77 (C), 133.80 (CH), 130.80 (CH), 129.73 (CH), 128.30 (CH), 120.50 (CH), 112.20 (CH), 83.99 (C), 24.72 ( $CH_3$ ) ppm;  $m/z$  (ES-API+) 321.1 ( $M^+ + 23$ , 100%).

Enantiomeric excess and conversion determined by HPLC analysis (Chiralcel OJ, 30 cm x 6mm column, hexane:iPrOH 95:5, 1.0 mL/min,  $T = 25^\circ C$ ) ketone 19.6 min, *R* and *S* isomers 6.7 min and 13.3 min.

<sup>1</sup>H NMR (500 MHz, CDCl<sub>3</sub>)

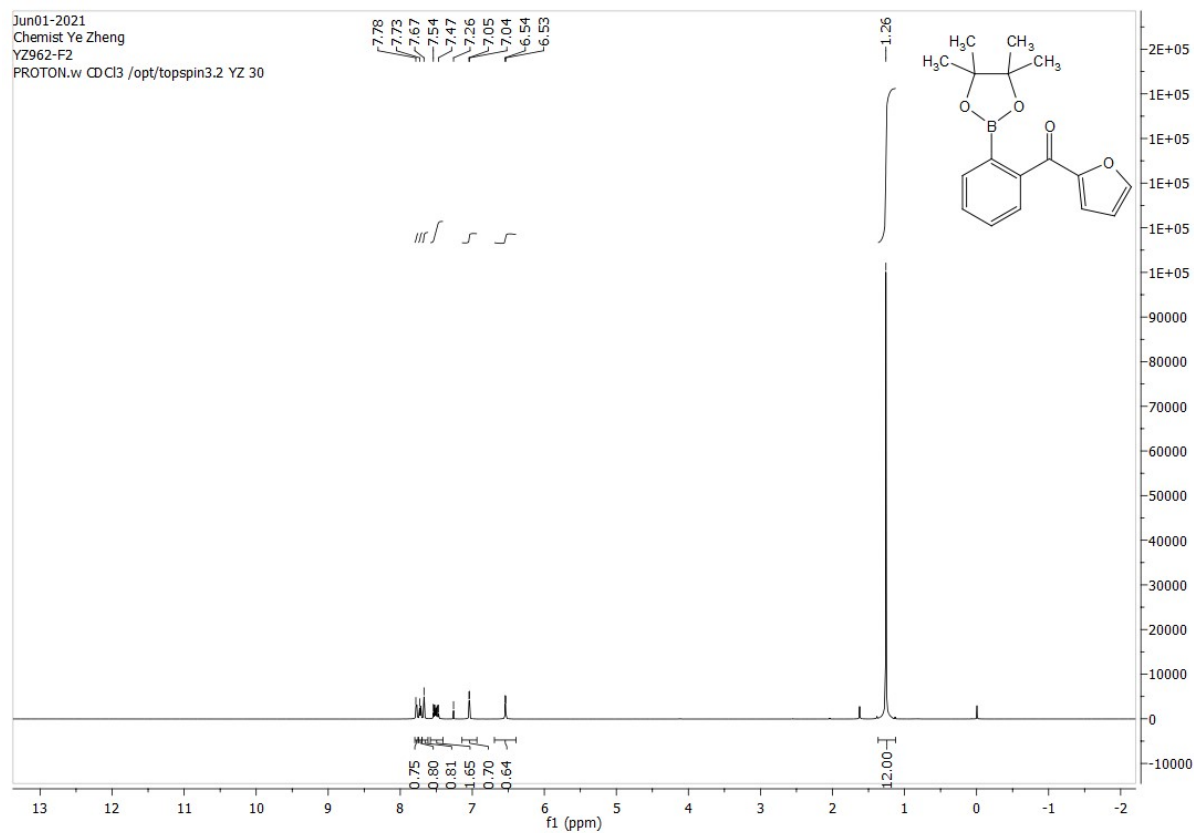

<sup>13</sup>C NMR (125 MHz, CDCl<sub>3</sub>)

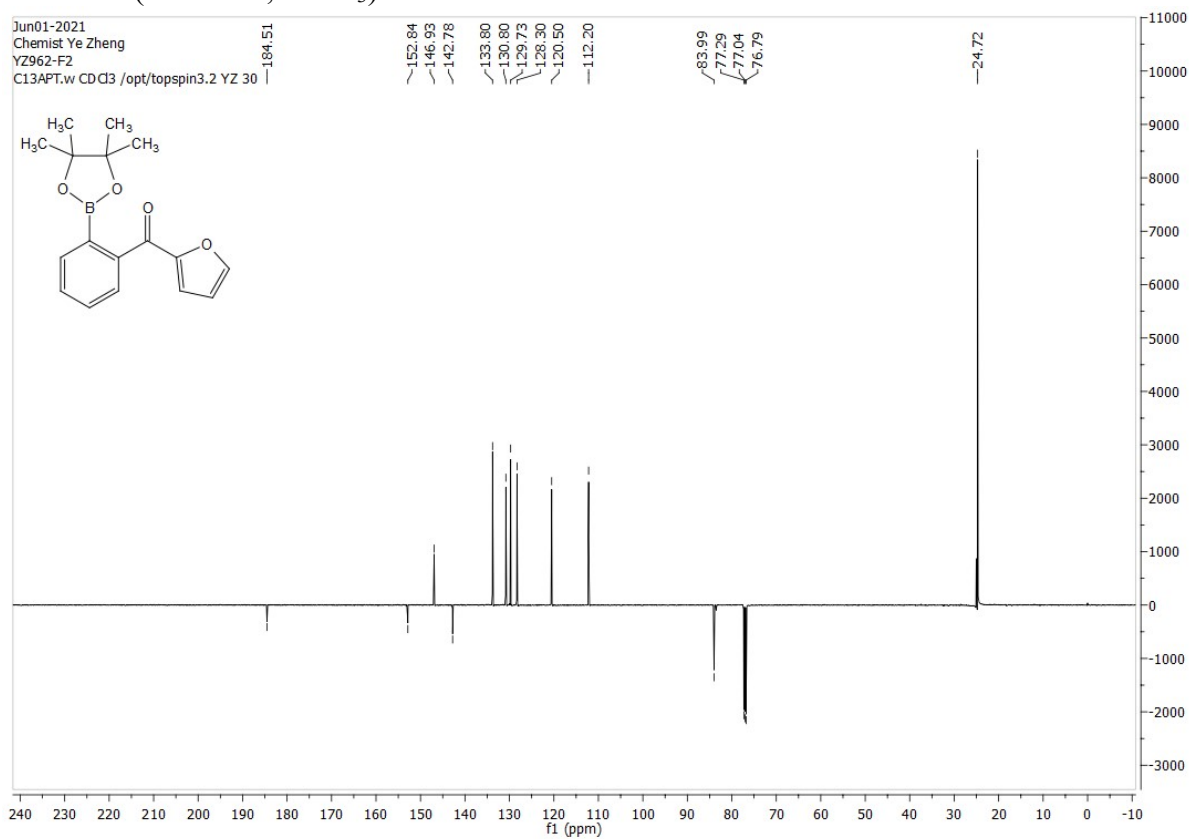

## COSY (500 MHz, CDCl<sub>3</sub>)

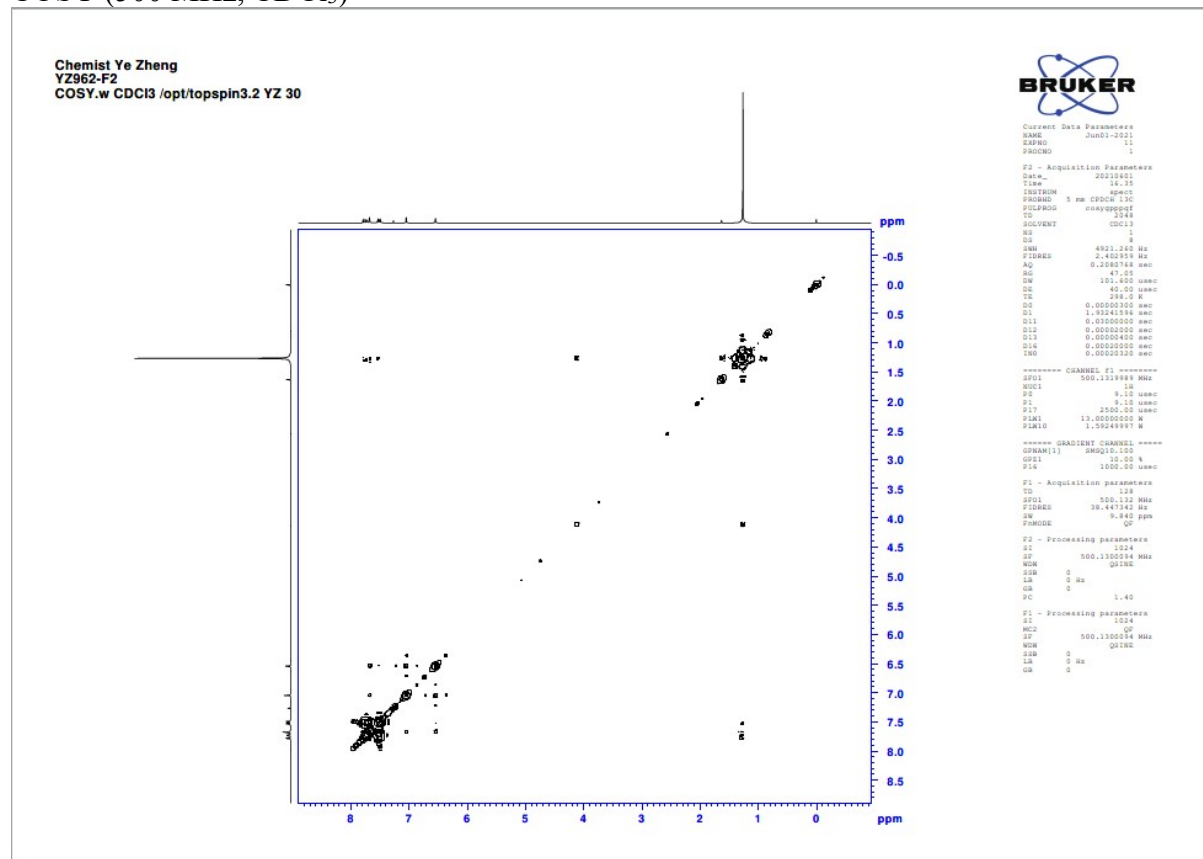

## HSQC (500 MHz, CDCl<sub>3</sub>)

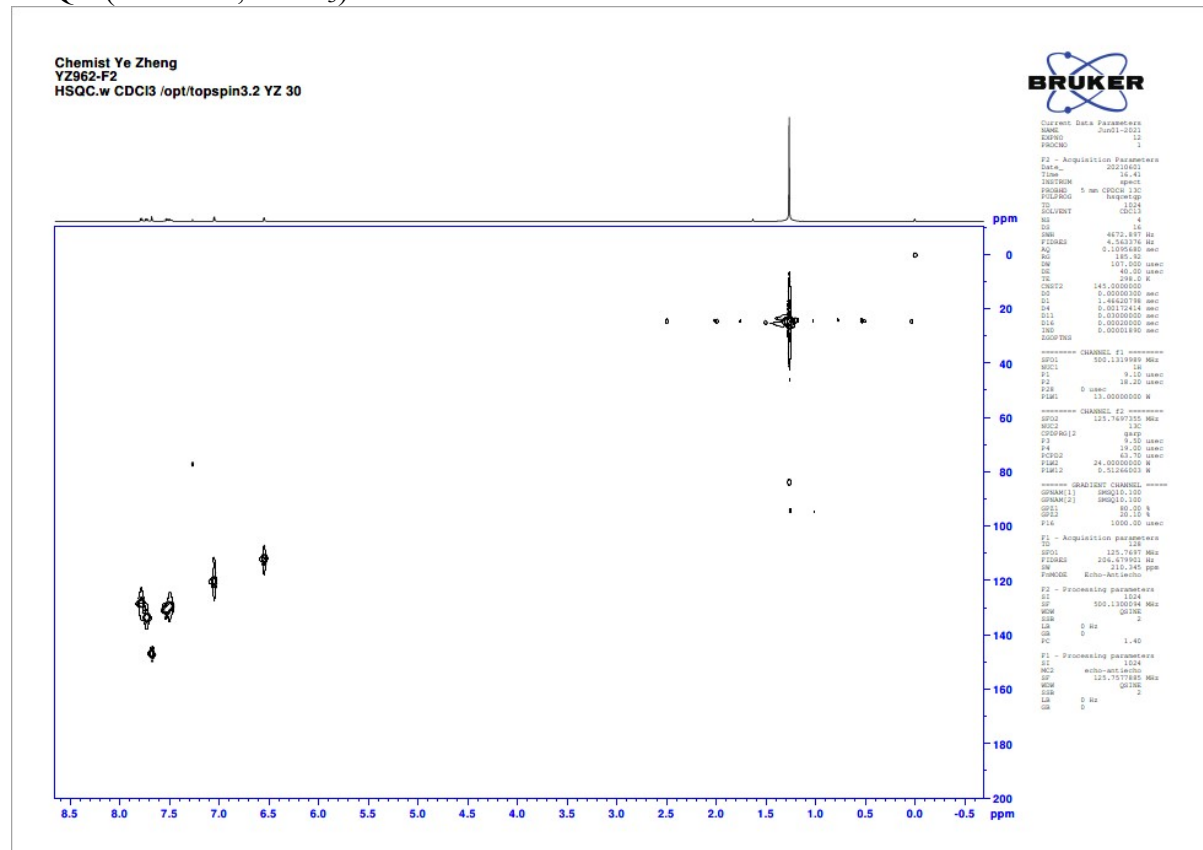

# HMBC (500 MHz, CDCl<sub>3</sub>)

Chemist Ye Zheng  
YZ962-F2  
HMBC.w CDCl<sub>3</sub> /opt/topspin3.2 YZ 30

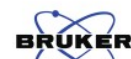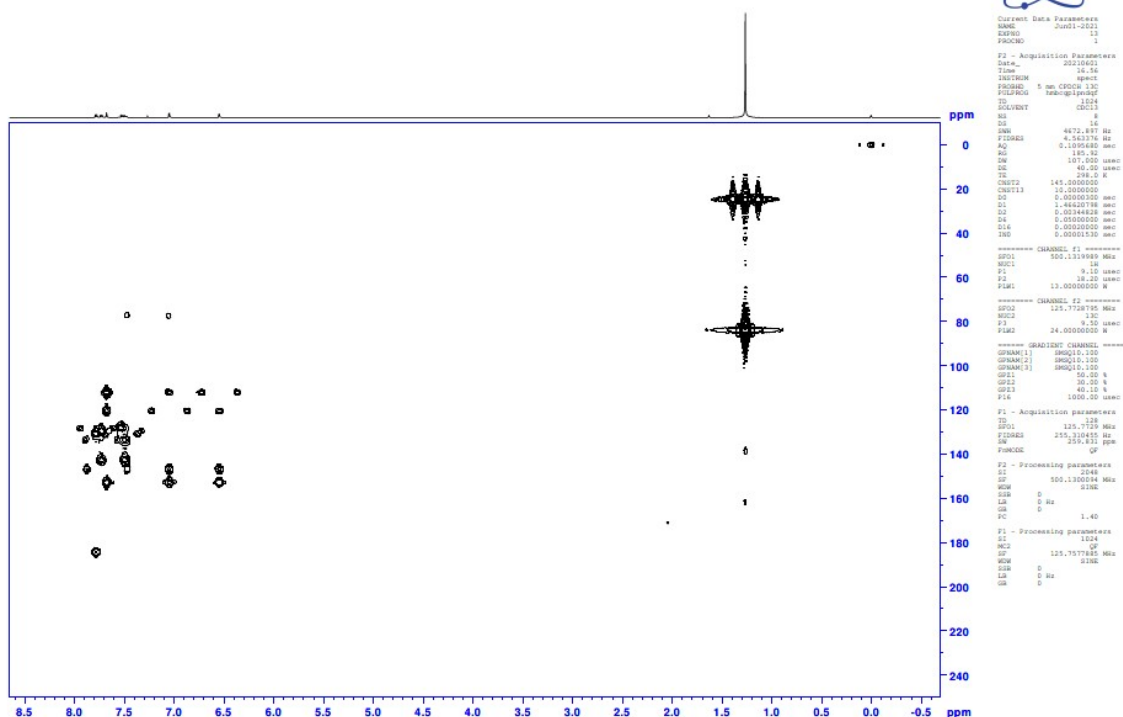

# HPLC of furan-2-yl(2-(4,4,5,5-tetramethyl-1,3,2-dioxaborolan-2-yl)phenyl)methanone

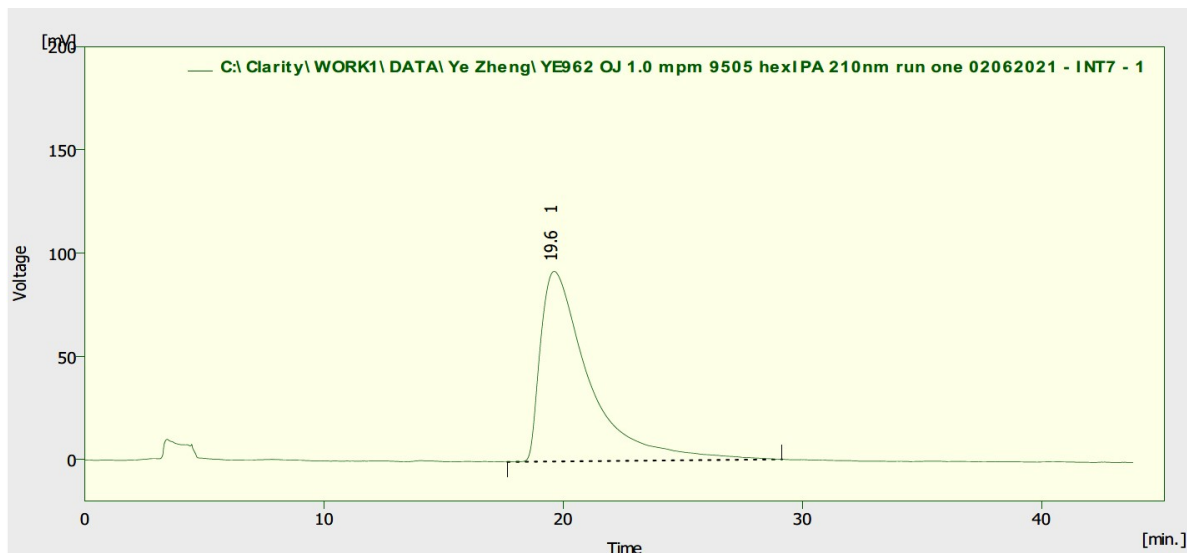

Result Table (Uncal - C:\Clarity\WORK1\DATA\Ye Zheng\YE962 OJ 1.0 mpm 9505 hexIPA 210nm run one 02062021 - INT7 - 1)

|   | Reten. Time<br>[min] | Area<br>[mV.s] | Height<br>[mV] | Area<br>[%] | Height<br>[%] | W05<br>[min] | Compound<br>Name |
|---|----------------------|----------------|----------------|-------------|---------------|--------------|------------------|
| 1 | 19.620               | 13060.040      | 92.090         | 100.0       | 100.0         | 1.93         |                  |
|   | Total                | 13060.040      | 92.090         | 100.0       | 100.0         |              |                  |

3-(Furan-2-yl)benzo[c][1,2]oxaborol-1(3*H*)-ol **28**.

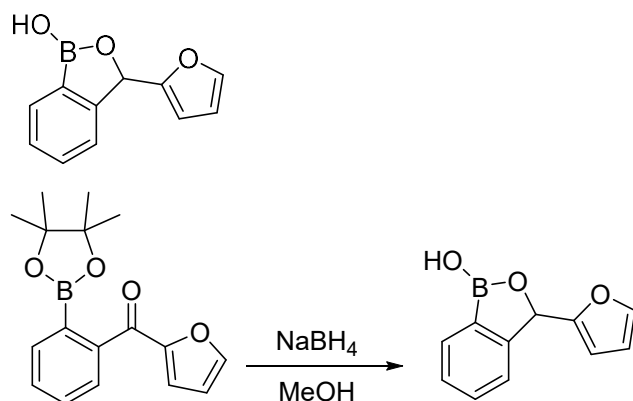

This compound has been reported in racemic form and fully characterization: J. Zhu, Y. Wei, D. Lin, C. Ou, L. Xie, Y. Zhao, W. Huang, *Org. Biomol. Chem.* 2015, **13**, 11362-11368.

To a solution of furan-2-yl(2-(4,4,5,5-tetramethyl-1,3,2-dioxaborolan-2-yl)phenyl)methanone (120 mg, 0.403 mmol) in MeOH (2.5 mL) was added sodium borohydride (30.6 mg, 0.806 mmol). The reaction was stirred for 4 hours. TLC (1:1 hexane: EtOAc) after this time indicated full conversion. Distilled water (20 mL) was added, and the mixture was extracted with EtOAc (3 × 20 mL), dried with MgSO<sub>4</sub>. Solvent was removed to give the crude product. The reaction was followed by TLC (1:1 hexane: EtOAc). The product was isolated via flash chromatography on silica eluted with 0-50% ethyl acetate in hexane to give 3-(furan-2-yl)benzo[c][1,2]oxaborol-1(3*H*)-ol **28** as a white solid (42.0 mg, 0.210 mmol, 52%). TLC: R<sub>f</sub> ca 0.20 (1:1 hexane: EtOAc), strong UV and KMnO<sub>4</sub>; δ<sub>H</sub> (400 MHz, CDCl<sub>3</sub>) 7.84-7.79 (1H, m, ArH), 7.53-7.49 (1H, m, ArH), 7.47-7.38 (2H, m, ArH), 7.35 (1H, d, *J* = 7.5, H in furan), 6.35-6.32 (1H, m, H in furan), 6.29-6.21 (2H, m, H in furan + ArCH) ppm; δ<sub>C</sub> (100 MHz, CDCl<sub>3</sub>) 153.40 (C), 152.85 (C), 143.35 (CH), 131.31 (CH), 130.62 (CH), 128.08 (CH), 122.34 (CH), 110.29 (CH), 108.54 (CH), 76.67 (CH) ppm. m/z (ES-API+) 247.1 (M<sup>+</sup> + 23, 100%). Data matched that reported.

Enantiomeric excess and conversion determined by HPLC analysis (Chiralcel OJ, 30 cm x 6 mm column, hexane:iPrOH 95:5, 1.0 mL/min, T = 25°C) ketone 19.6 min, *R* and *S* isomers 6.7 min and 13.3 min, configuration is not confirmed.

ATH of furan-2-yl(2-(4,4,5,5-tetramethyl-1,3,2-dioxaborolan-2-yl)phenyl)methanone.

(*R,R*)-3C-tethered Ru(II)-TsDPEN catalyst **2** (2.50 mg, 0.00403 mmol, 1mol%) was added to FA: TEA (5:2 azeotropic mixture, 0.54 mL) at rt and the mixture was stirred under a nitrogen inert atmosphere for 10-15 minutes; after which a solution furan-2-yl(2-(4,4,5,5-tetramethyl-1,3,2-dioxaborolan-2-yl)phenyl)methanone (120 mg, 0.403 mmol) in DCM (0.75 mL) was added. The reaction mixture was stirred under a nitrogen atmosphere, followed by TLC (1:1 hexane: EtOAc). After 72 hours, the reaction was quenched using saturated NaHCO<sub>3</sub> solution (20 mL). EtOAc (20 mL) was added and the organic layer was separated. The aqueous layer was extracted with EtOAc (3 x 20 mL) and the combined organic layers were dried (MgSO<sub>4</sub>) and filtered. The solvent was removed to give the crude product. The product was isolated via flash chromatography on silica eluted with 0-50% ethyl acetate in hexane to give 3-(furan-2-yl)benzo[*c*][1,2]oxaborol-1(3*H*)-ol **28** (16.0 mg, 0.0800 mmol, 20%). The reaction was also followed by HPLC analysis (Chiralcel OJ, 30 cm x 6mm column, hexane:iPrOH 95:5, 1.0 mL/min, T = 25°C): 100% conversion, 5% ee

$^1\text{H}$  NMR (400 MHz,  $\text{CDCl}_3$ )

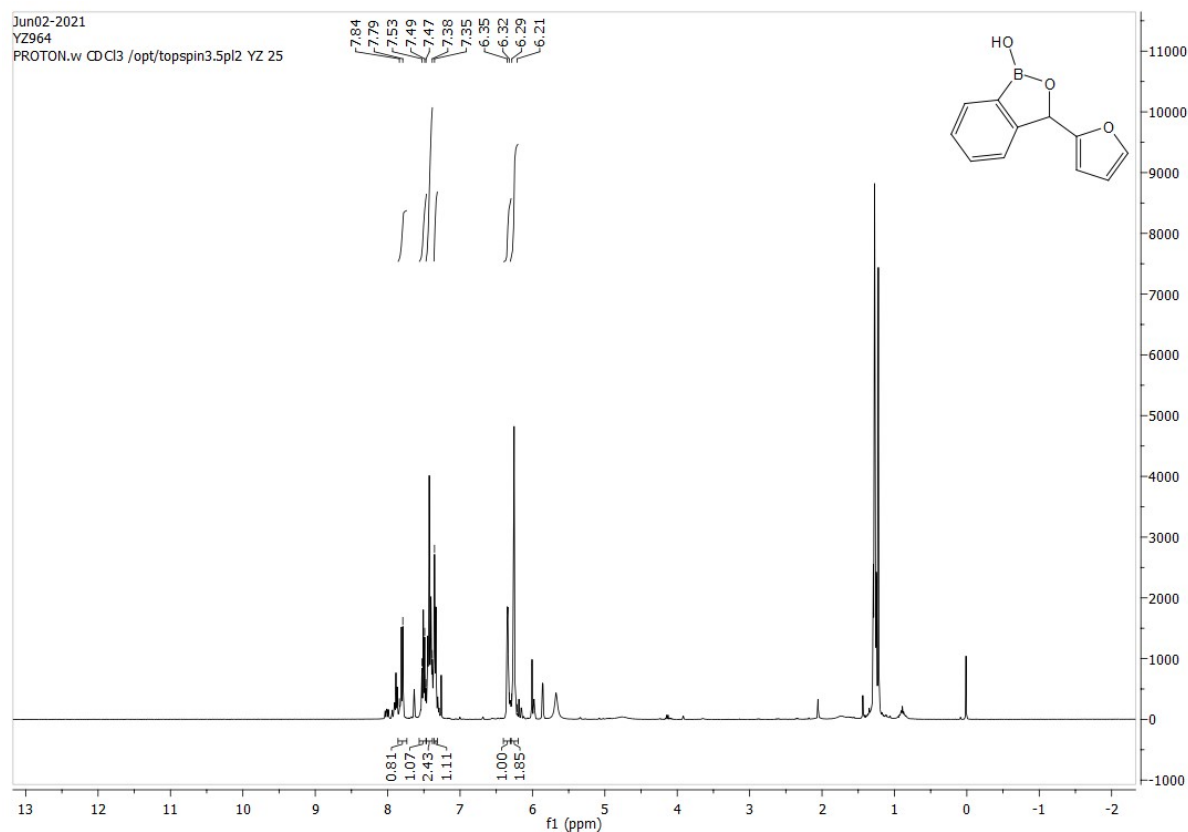

$^{13}\text{C}$  NMR (100 MHz,  $\text{CDCl}_3$ )

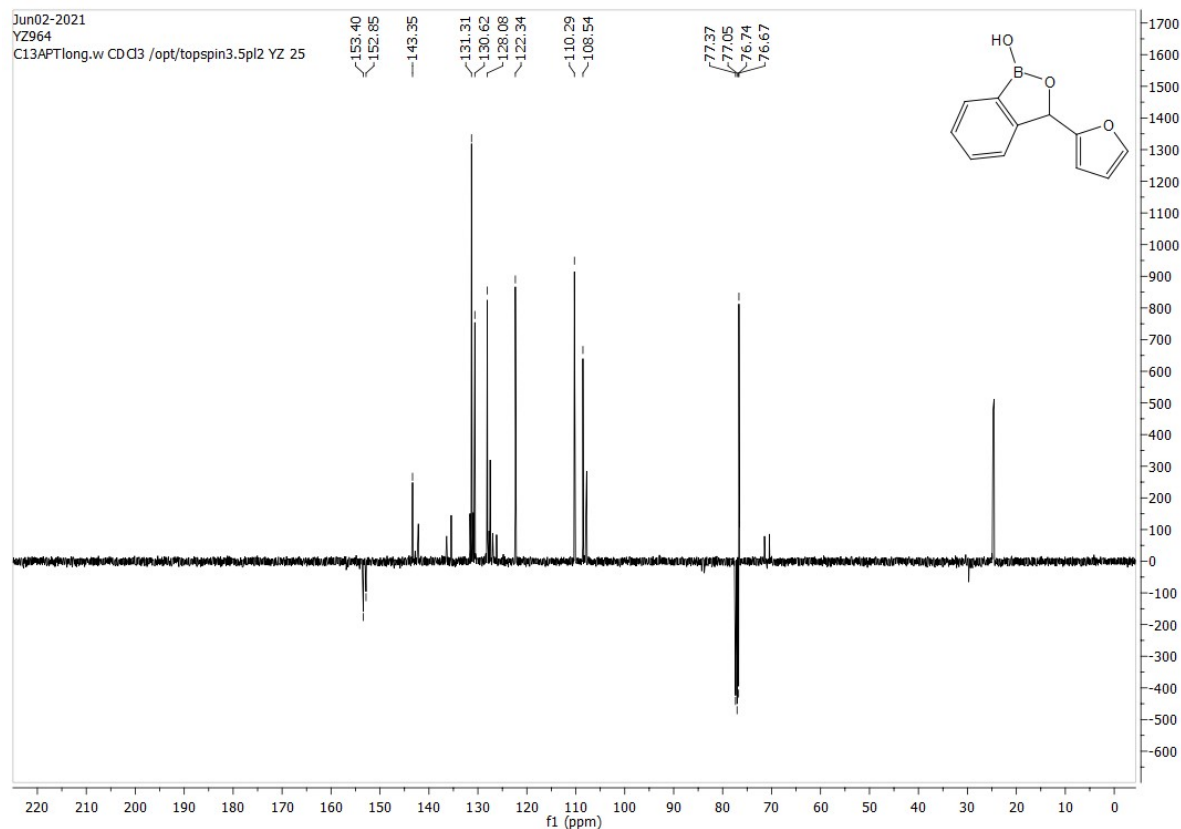

HPLC of racemic 3-(furan-2-yl)benzo[c][1,2]oxaborol-1(3*H*)-ol **28**.

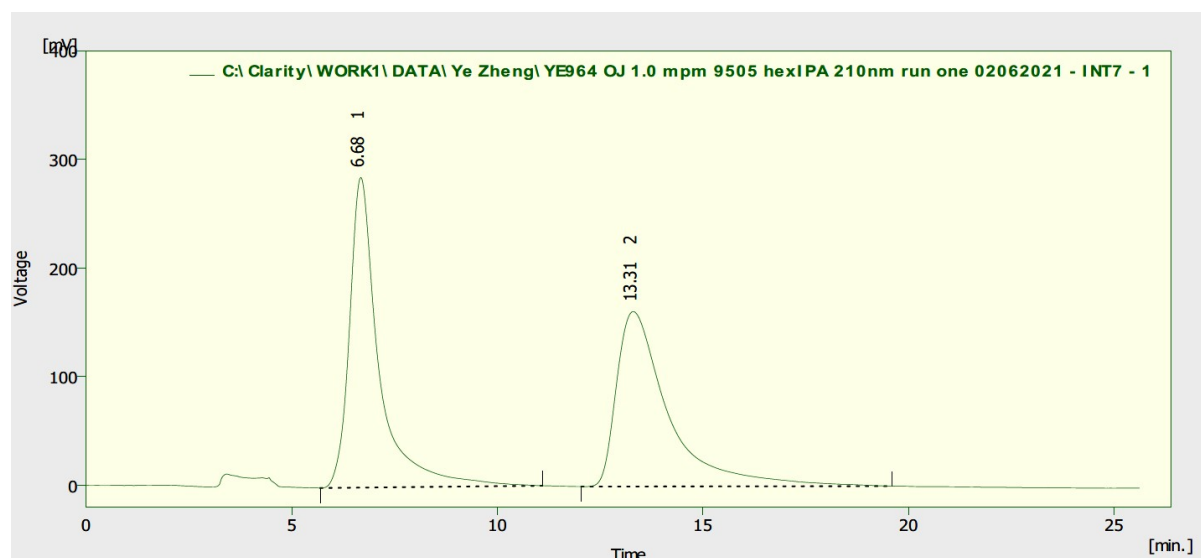

Result Table (Uncal - C:\Clarity\WORK1\DATA\Ye Zheng\YE964 OJ 1.0 mpm 9505 hexIPA 210nm run one 02062021 - INT7 - 1)

|   | Reten. Time<br>[min] | Area<br>[mV.s] | Height<br>[mV] | Area<br>[%] | Height<br>[%] | W05<br>[min] | Compound<br>Name |
|---|----------------------|----------------|----------------|-------------|---------------|--------------|------------------|
| 1 | 6.680                | 14338.745      | 285.453        | 50.3        | 63.9          | 0.63         |                  |
| 2 | 13.307               | 14157.038      | 161.086        | 49.7        | 36.1          | 1.18         |                  |
|   | Total                | 28495.782      | 446.540        | 100.0       | 100.0         |              |                  |

HPLC after ATH of furan-2-yl(2-(4,4,5,5-tetramethyl-1,3,2-dioxaborolan-2-yl)phenyl)methanone using (*R,R*)-3C-tethered Ru(II)-TsDPEN catalyst **2** (after 72 hours, 100% conversion, 4.8% ee)

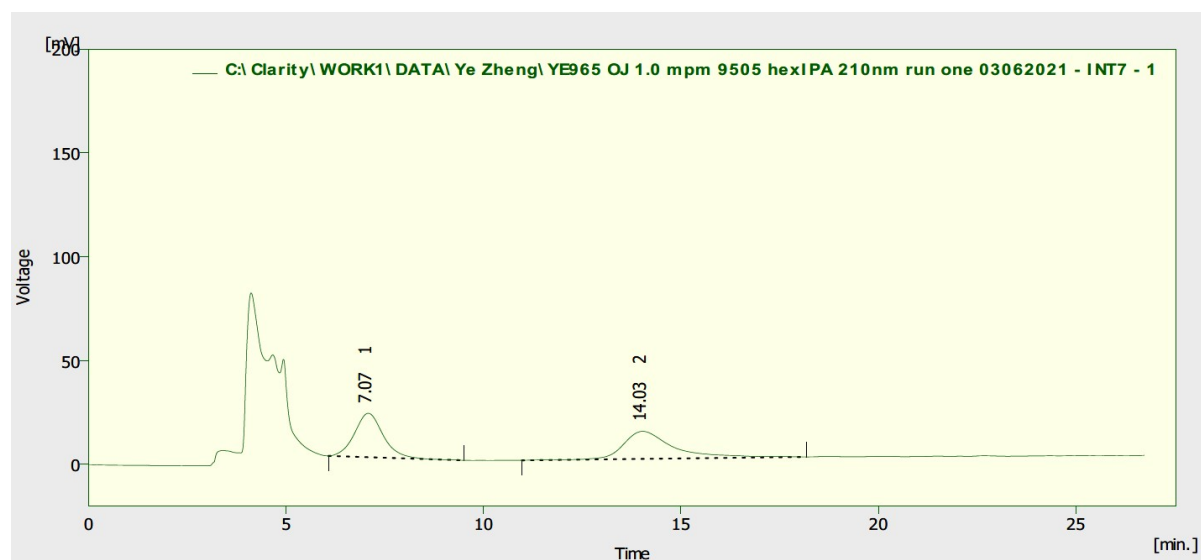

Result Table (Uncal - C:\Clarity\WORK1\DATA\Ye Zheng\YE965 OJ 1.0 mpm 9505 hexIPA 210nm run one 03062021 - INT7 - 1)

|   | Reten. Time<br>[min] | Area<br>[mV.s] | Height<br>[mV] | Area<br>[%] | Height<br>[%] | W05<br>[min] | Compound<br>Name |
|---|----------------------|----------------|----------------|-------------|---------------|--------------|------------------|
| 1 | 7.073                | 1072.229       | 21.170         | 47.6        | 61.5          | 0.76         |                  |
| 2 | 14.027               | 1182.198       | 13.265         | 52.4        | 38.5          | 1.19         |                  |
|   | Total                | 2254.427       | 34.435         | 100.0       | 100.0         |              |                  |



## Data related to Figure 6.

### 1-(4-Styrylphenyl)ethan-1-ol **29**.

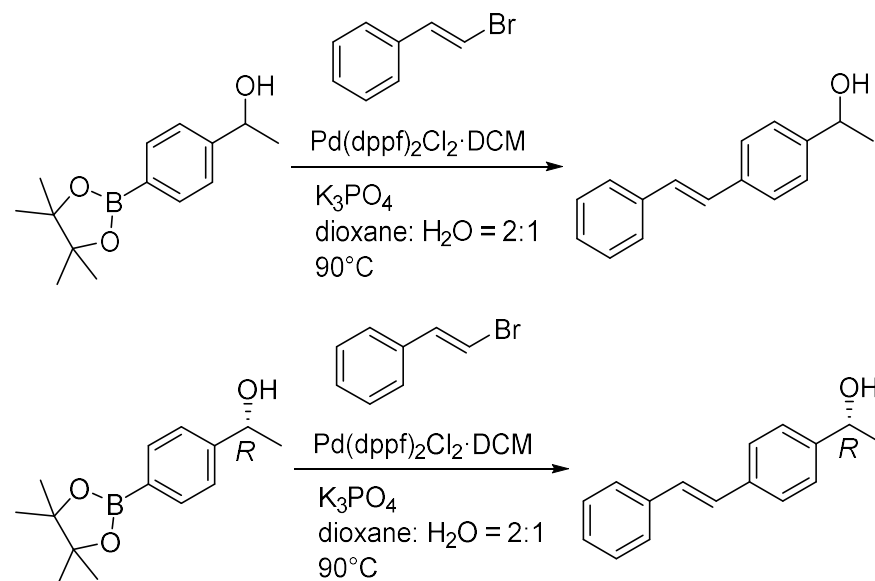

This compound has been reported and fully characterized: X. Shu, R. Jin, Z. Zhao, T. Cheng and G. Liu, *Chem. Commun.* 2018, **54**, 13244-13247.

**Racemic:** To a solution of racemic 1-(4-(4,4,5,5-tetramethyl-1,3,2-dioxaborolan-2-yl)phenyl)ethan-1-ol **7** (52.0 mg, 0.210 mmol),  $\beta$ -bromostyrene (57.6 mg, 0.315 mmol) and tripotassium phosphate (134 mg, 0.630 mmol) in dioxane (1 mL) and distilled water (0.5 mL) was added  $\text{Pd(dppf)}_2\text{Cl}_2 \cdot \text{DCM}$  (8.58 mg, 0.0105 mmol). The reaction mixture was heated to  $90^\circ\text{C}$  and left stirring under the nitrogen atmosphere overnight, followed by TLC (4:1 hexane: EtOAc). The mixture was quenched by distilled water (20 mL). EtOAc (20 mL) was added and the organic layer was separated. The aqueous layer was extracted with EtOAc ( $3 \times 20$  mL), and the combined organic layers were dried ( $\text{MgSO}_4$ ) and filtered. Solvent was removed to give the crude product. The product was isolated via flash chromatography on silica eluted with 0-20% ethyl acetate in hexane to give racemic 1-(4-styrylphenyl)ethan-1-ol **29** as a white solid (32.0 mg, 0.143 mmol, 68%). TLC:  $R_f$  ca 0.30 (4:1 hexane: EtOAc), strong UV and  $\text{KMnO}_4$ ;  $\delta_{\text{H}}$  (400 MHz,  $\text{CDCl}_3$ ) 7.44-7.41 (4H, m, ArH), 7.30-7.26 (4H, m, ArH), 7.20-7.15 (1H, m, ArH), 7.03 (2H, s, CH=CH), 4.84 (1H, q,  $J$  = 6.4, ArCH), 1.73 (1H, s, OH), 1.44 (3H, d,  $J$  = 6.4,  $\text{CH}_3$ ) ppm;  $\delta_{\text{C}}$  (100 MHz,  $\text{CDCl}_3$ ) 145.24 (C), 137.32 (C), 136.67 (C), 128.71 (CH), 128.68 (CH), 128.30 (CH), 127.66 (CH), 126.52 (CH), 125.79 (CH), 70.22 (CH), 25.12 ( $\text{CH}_3$ ) ppm;  $m/z$  (ES-API+) 247.1 ( $\text{M}^+ + 23$ , 100%). Data matched that reported.

Enantiomeric excess and conversion determined by HPLC analysis (Chiralcel IG, 30 cm x 6mm column, hexane:iPrOH 95:5, 0.5 mL/min, T = 25°C) *R* isomer 38.0 min and *S* isomer 41.3 min.

Asymmetric:

To a solution of (*R*)-1-(4-(4,4,5,5-tetramethyl-1,3,2-dioxaborolan-2-yl)phenyl)ethan-1-ol **7** (100 mg, 0.403 mmol),  $\beta$ -bromostyrene (111 mg, 0.605 mmol) and tripotassium phosphate (257 mg, 1.21 mmol) in dioxane (2 mL) and distilled water (1 mL) was added Pd(dppf)<sub>2</sub>Cl<sub>2</sub>·DCM (16.5 mg, 0.0202 mmol). The reaction mixture was heated to 90 °C and left stirring under the nitrogen atmosphere overnight, followed by TLC (4:1 hexane: EtOAc). The mixture was quenched by distilled water (20 mL). EtOAc (20 mL) was added and the organic layer was separated. The aqueous layer was extracted with EtOAc (3 × 20 mL), and the combined organic layers were dried (MgSO<sub>4</sub>) and filtered. Solvent was removed to give the crude product. The product was isolated via flash chromatography on silica eluted with 0-20% ethyl acetate in hexane to give (*R*)-1-(4-styrylphenyl)ethan-1-ol **29** as a white solid (67.0 mg, 0.299 mmol, 74%). The reaction was also followed by HPLC (Chiralcel IG, 30 cm x 6mm column, hexane:iPrOH 95:5, 0.5 mL/min, T = 25°C): [ $\alpha$ ]<sub>D</sub><sup>30</sup> +35 (c 0.180 in CHCl<sub>3</sub>) 98% ee (*R*).

<sup>1</sup>H NMR (400 MHz, CDCl<sub>3</sub>)

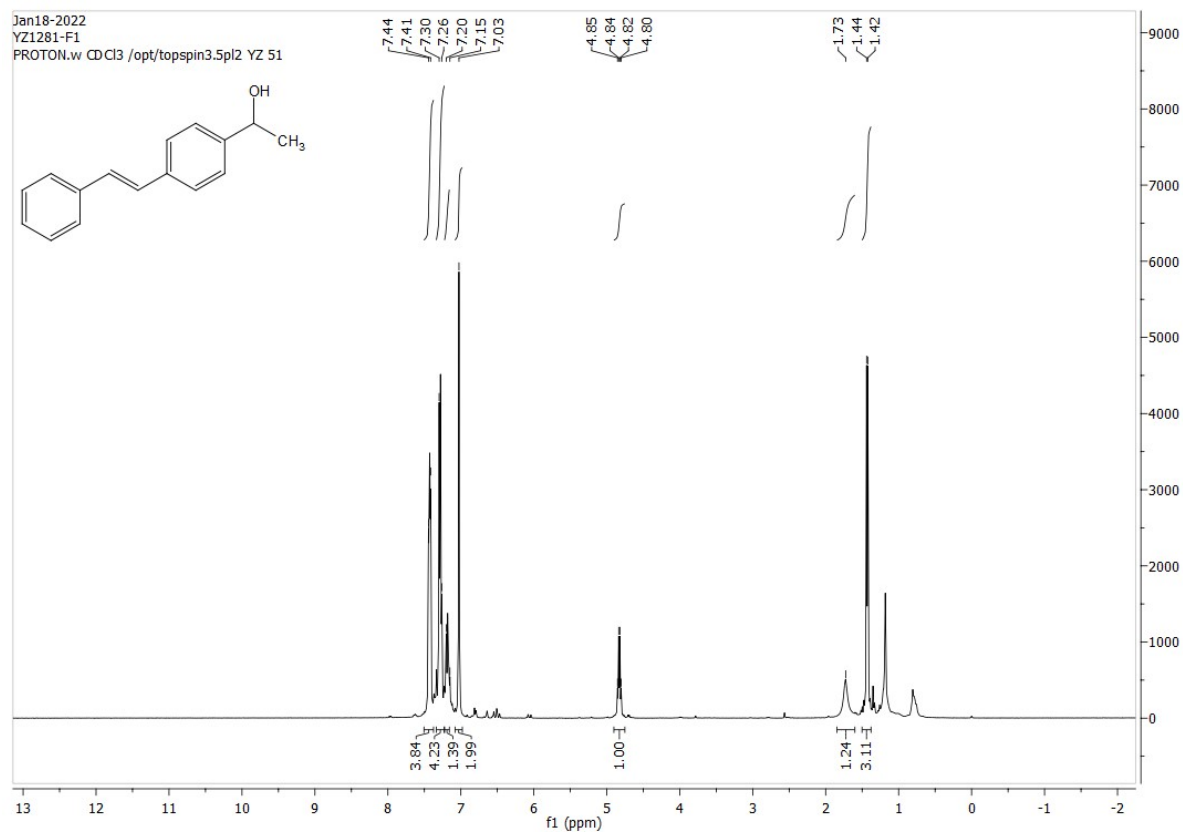

<sup>13</sup>C NMR (100 MHz, CDCl<sub>3</sub>)

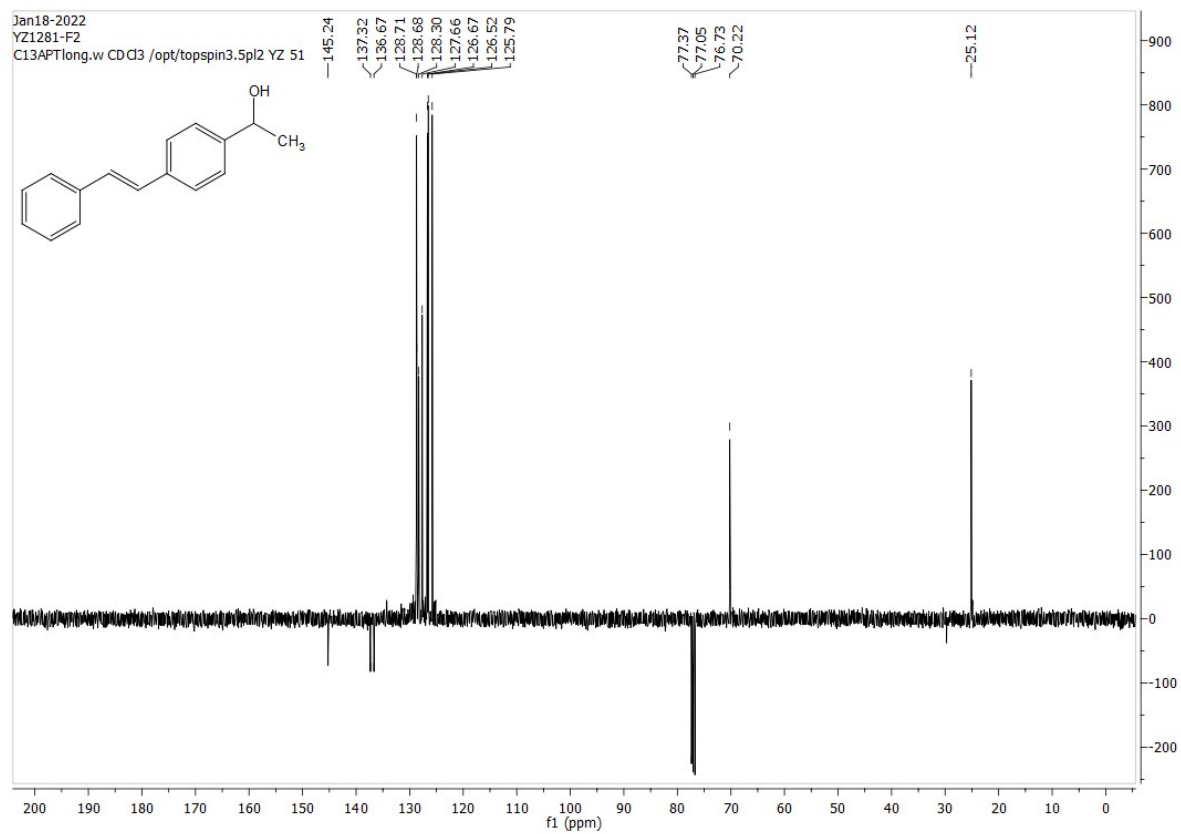

# HPLC of racemic 1-(4-styrylphenyl)ethan-1-ol **29**.

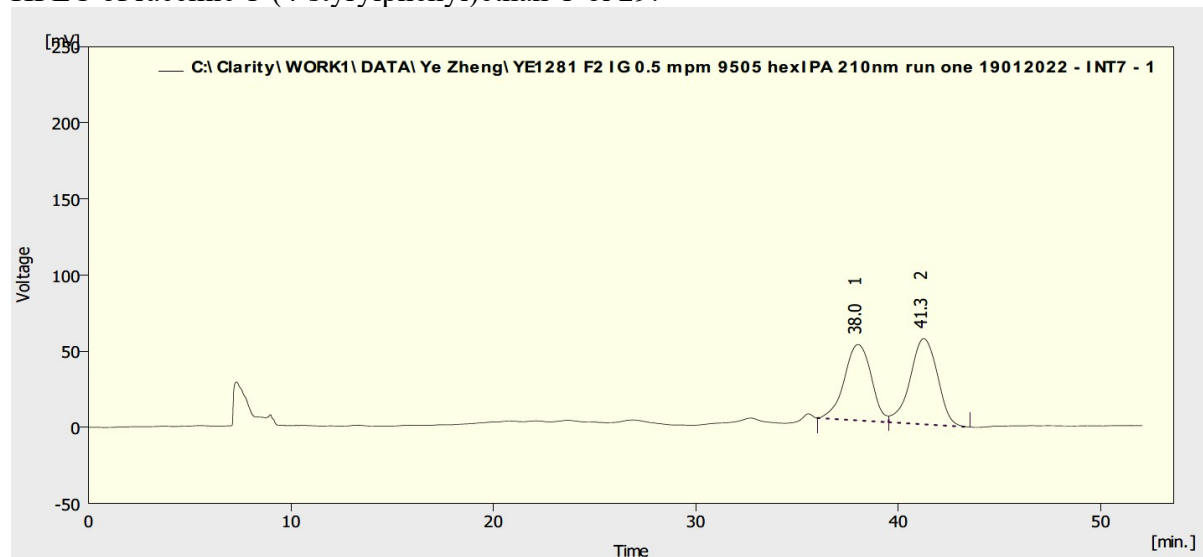

Result Table (Uncal - C:\Clarity\WORK1\DATA\Ye Zheng\YE1281 F2 IG 0.5 mpm 9505 hexIPA 210nm run one 19012022 - INT7 - 1)

|   | Reten. Time<br>[min] | Area<br>[mV.s] | Height<br>[mV] | Area<br>[%] | Height<br>[%] | W05<br>[min] | Compound<br>Name |
|---|----------------------|----------------|----------------|-------------|---------------|--------------|------------------|
| 1 | 38.007               | 4630.356       | 49.923         | 46.6        | 46.9          | 1.45         |                  |
| 2 | 41.257               | 5301.890       | 56.409         | 53.4        | 53.1          | 1.46         |                  |
|   | Total                | 9932.246       | 106.332        | 100.0       | 100.0         |              |                  |

# HPLC of 1-(4-styrylphenyl)ethan-1-ol **29** (97% ee, *R* configuration).

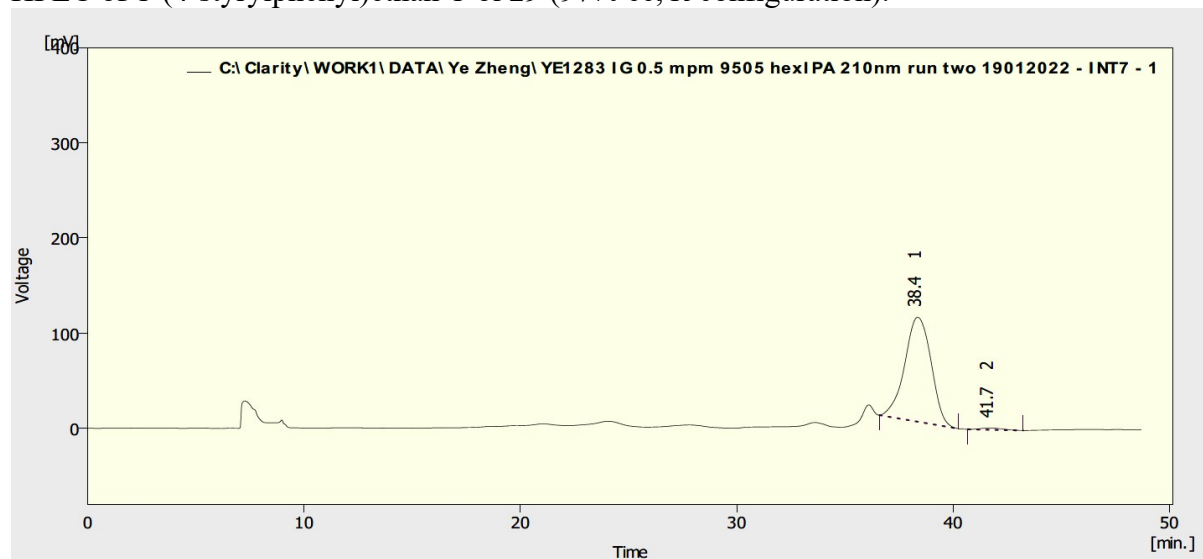

Result Table (Uncal - C:\Clarity\WORK1\DATA\Ye Zheng\YE1283 IG 0.5 mpm 9505 hexIPA 210nm run two 19012022 - INT7 - 1)

|   | Reten. Time<br>[min] | Area<br>[mV.s] | Height<br>[mV] | Area<br>[%] | Height<br>[%] | W05<br>[min] | Compound<br>Name |
|---|----------------------|----------------|----------------|-------------|---------------|--------------|------------------|
| 1 | 38.367               | 9324.242       | 109.836        | 98.6        | 98.3          | 1.33         |                  |
| 2 | 41.703               | 130.272        | 1.902          | 1.4         | 1.7           | 1.10         |                  |
|   | Total                | 9454.514       | 111.738        | 100.0       | 100.0         |              |                  |

2-Phenoxy-1-(4-styrylphenyl)ethan-1-ol **30**.

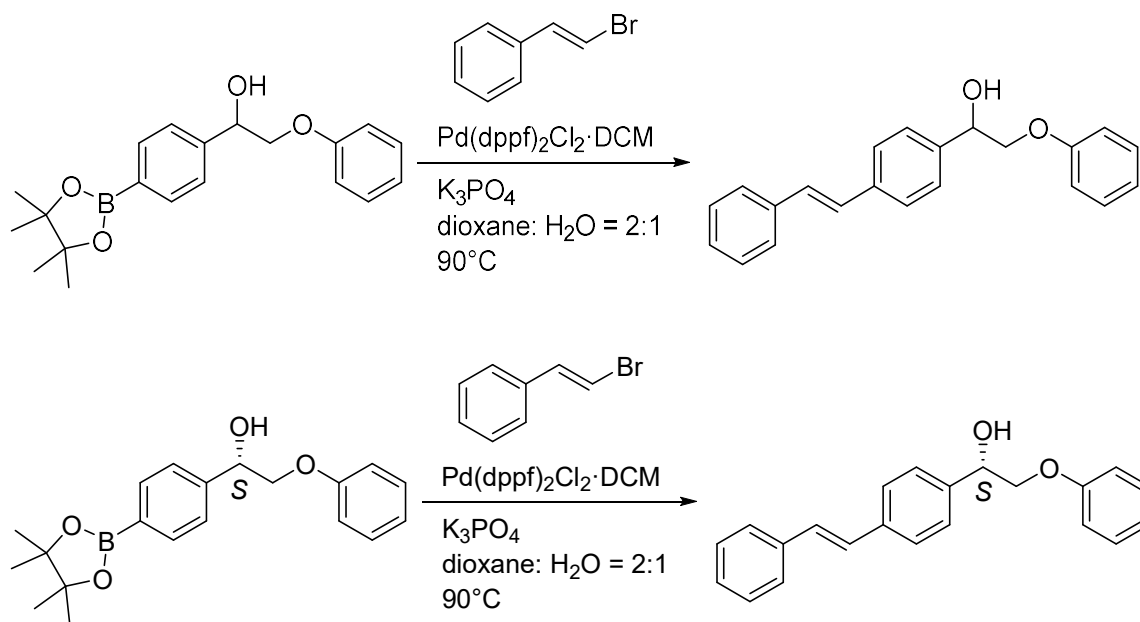

This compound is novel.

Racemic:

To a solution of racemic 2-phenoxy-1-(4-(4,4,5,5-tetramethyl-1,3,2-dioxaborolan-2-yl)phenyl)ethan-1-ol **12** (88.0 mg, 0.259 mmol),  $\beta$ -bromostyrene (71.2 mg, 0.389 mmol) and tripotassium phosphate (165 mg, 0.777 mmol) in dioxane (1.3 mL) and distilled water (0.7 mL) was added  $\text{Pd(dppf)}_2\text{Cl}_2\cdot\text{DCM}$  (10.6 mg, 0.0130 mmol). The reaction mixture was heated to 90 °C and left stirring under the nitrogen atmosphere overnight, followed by TLC (4:1 hexane: EtOAc). The mixture was quenched by distilled water (20 mL). EtOAc (20 mL) was added and the organic layer was separated. The aqueous layer was extracted with EtOAc (3  $\times$  20 mL), and the combined organic layers were dried ( $\text{MgSO}_4$ ) and filtered. Solvent was removed to give the crude product. The product was isolated via flash chromatography on silica eluted with 0-20% ethyl acetate in hexane to give racemic 2-phenoxy-1-(4-styrylphenyl)ethan-1-ol **30** as a yellow solid (40.0 mg, 0.127 mmol, 49%). TLC:  $R_f$  ca 0.40 (4:1 hexane: EtOAc), strong UV and  $\text{KMnO}_4$ ; Mp: 128 °C; HRMS: (found (ESI<sup>+</sup>):  $[\text{M}+\text{H}]^+$ , Calcd for  $\text{C}_{22}\text{H}_{20}\text{NaO}_2$  339.1353; Found 339.1356; 0.8 ppm error;  $\nu_{\text{max}}$  3393 (br), 3055, 3024, 2922, 2868, 1598, 1586, 1493, 1449, 1239, 1172, 1076, 1037, 1017  $\text{cm}^{-1}$ ;  $\delta_{\text{H}}$  (400 MHz,  $\text{CDCl}_3$ ) 7.45 (4H, t,  $J$  = 7.6, ArH), 7.38 (2H, d,  $J$  = 8.0, ArH), 7.29 (2H, t,  $J$  = 7.5, ArH), 7.23-7.19 (3H, m, ArH), 7.04 (2H, s, CH=CH),

6.90 (1H, t,  $J = 7.3$ , ArH), 6.86 (2H, d,  $J = 8.2$ , ArH), 5.06 (1H, dd,  $J = 8.7, 2.7$ , ArCH), 4.05 (1H, dd,  $J = 9.6, 3.0$ , CH<sub>2</sub>), 3.94 (1H, t,  $J = 9.2$ , CH<sub>2</sub>), 2.72 (1H, s, OH) ppm;  $\delta_c$  (100 MHz, CDCl<sub>3</sub>) 158.39 (C), 138.99 (C), 137.36 (C), 137.23 (C), 129.61 (CH), 129.05 (CH), 128.74 (CH), 128.18 (CH), 127.76 (CH), 126.70 (CH), 126.68 (CH), 126.57 (CH), 121.37 (CH), 114.68 (CH), 73.20 (CH<sub>2</sub>), 72.43 (CH) ppm;  $m/z$  (ES-API+) 339.1 ( $M^+ + 23$ , 100%).

Enantiomeric excess and conversion determined by HPLC analysis (Chiralcel ODH, 30 cm x 6mm column, hexane:iPrOH 80:20, 1.0 mL/min,  $T = 25^\circ\text{C}$ ) *R* isomer 14.9 min and *S* isomer 21.2 min.

#### Asymmetric:

To a solution of (*S*)-2-phenoxy-1-(4-(4,4,5,5-tetramethyl-1,3,2-dioxaborolan-2-yl)phenyl)ethan-1-ol **12** (145 mg, 0.426 mmol),  $\beta$ -bromostyrene (117 mg, 0.639 mmol) and tripotassium phosphate (271 mg, 1.28 mmol) in dioxane (2.1 mL) and distilled water (1.1 mL) was added Pd(dppf)<sub>2</sub>Cl<sub>2</sub>·DCM (17.4 mg, 0.0213 mmol). The reaction mixture was heated to 90 °C and left stirring under the nitrogen atmosphere overnight, followed by TLC (4:1 hexane: EtOAc). The mixture was quenched by distilled water (20 mL). EtOAc (20 mL) was added and the organic layer was separated. The aqueous layer was extracted with EtOAc (3 × 20 mL), and the combined organic layers were dried (MgSO<sub>4</sub>) and filtered. Solvent was removed to give the crude product. The product was isolated via flash chromatography on silica eluted with 0-20% ethyl acetate in hexane to give (*S*)-2-phenoxy-1-(4-styrylphenyl)ethan-1-ol **30** as a yellow solid (68.0 mg, 0.215 mmol, 50%). The reaction was also followed by HPLC (Chiralcel ODH, 30 cm x 6mm column, hexane:iPrOH 80:20, 1.0 mL/min,  $T = 25^\circ\text{C}$ ):  $[\alpha]_D^{30} +43.3$  (c 0.187 in CHCl<sub>3</sub>) 96% ee (*S*)

<sup>1</sup>H NMR (400 MHz, CDCl<sub>3</sub>)

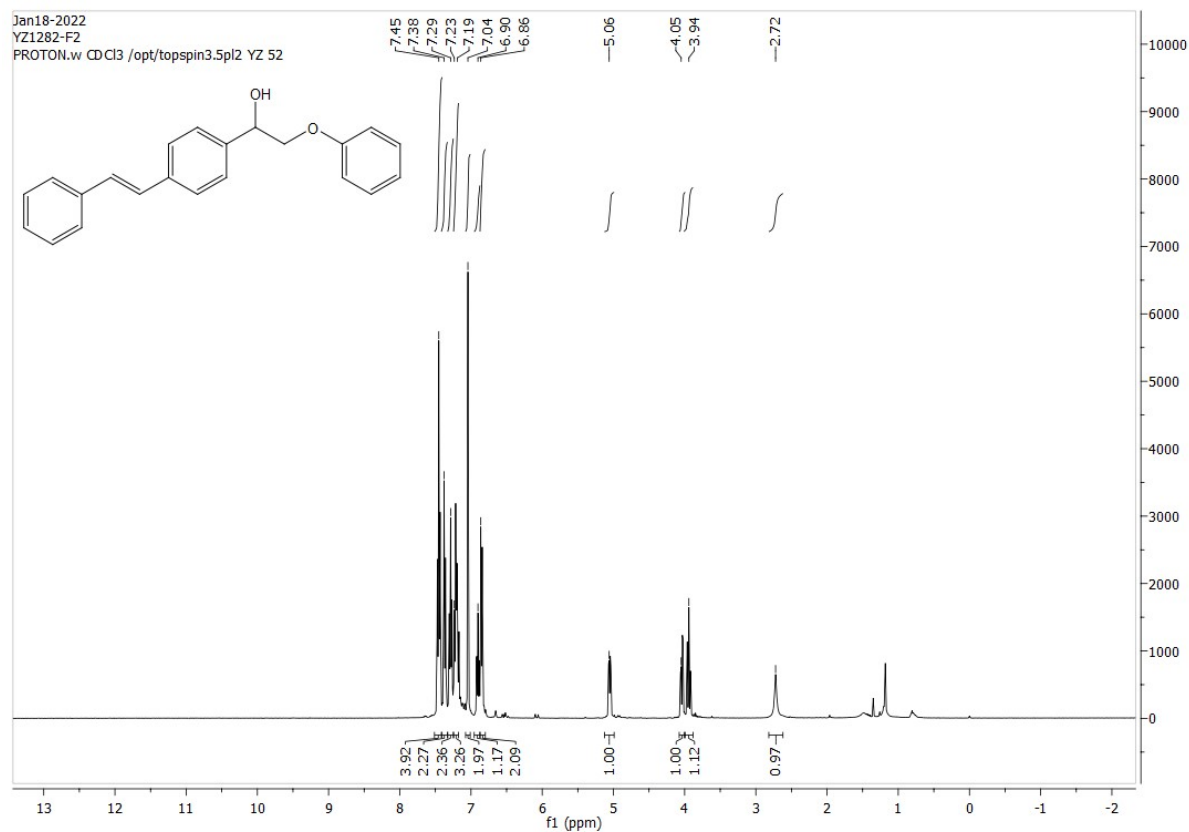

<sup>13</sup>C NMR (100 MHz, CDCl<sub>3</sub>)

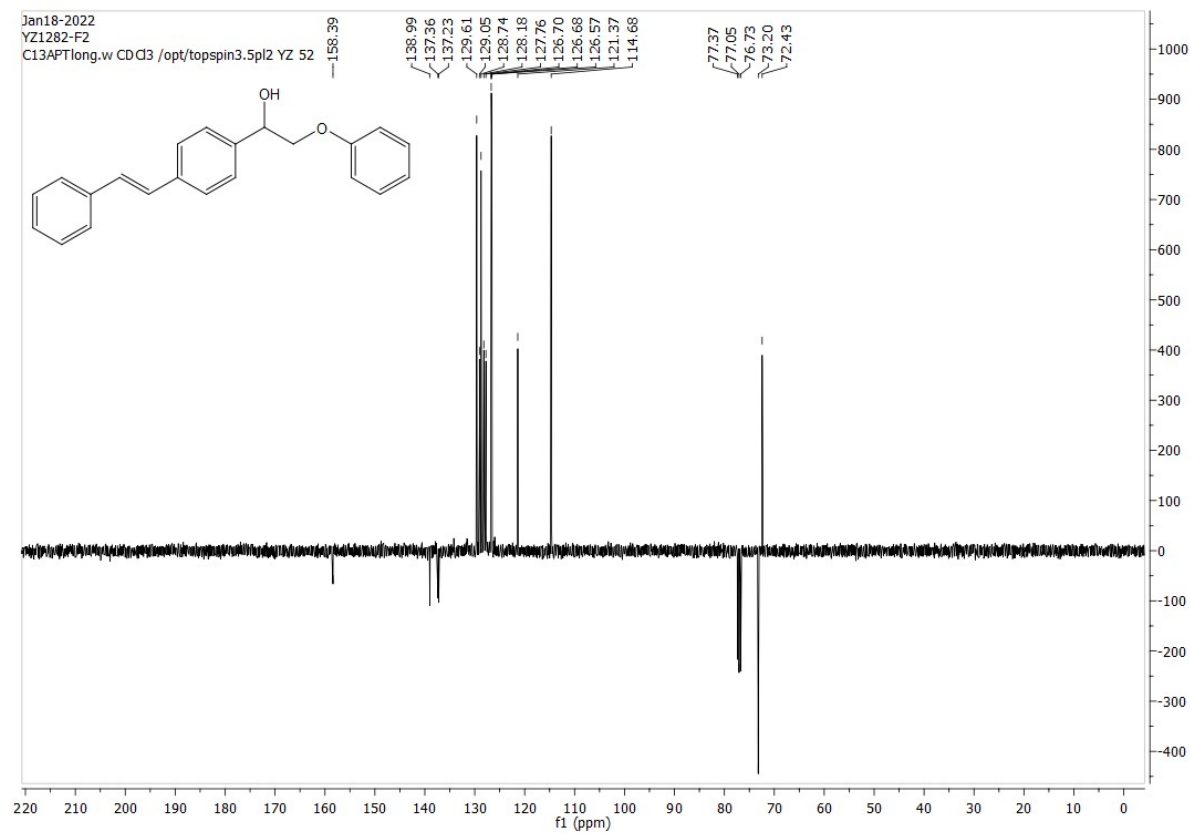

# COSY (400 MHz, CDCl<sub>3</sub>)

YZ1282-F2  
COSY.w CDCl<sub>3</sub> /opt/topspin3.5pl2 YZ 52

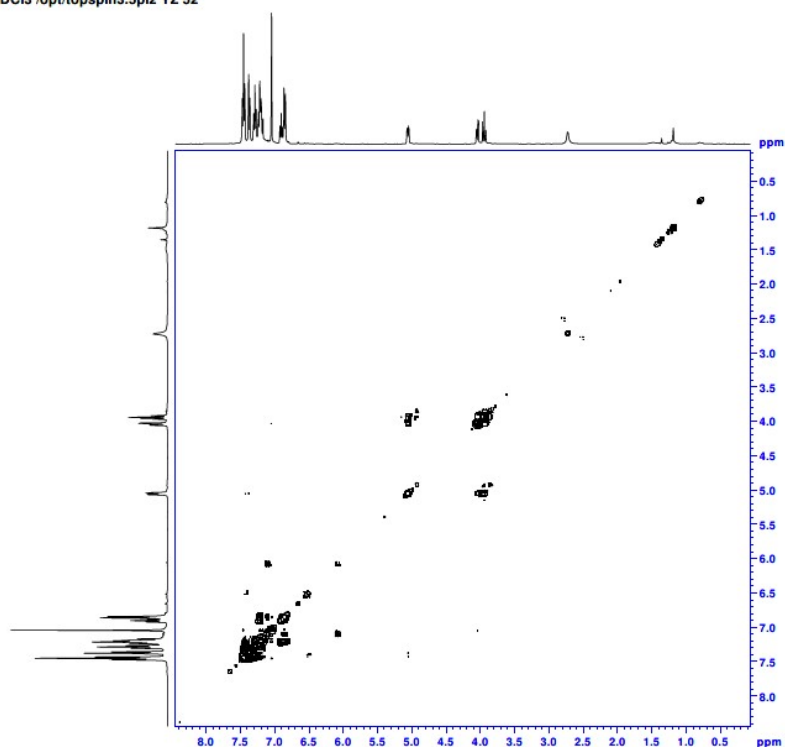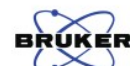

Current Data Parameters  
NAME YZ1282-F2  
EXPNO 2  
PROCNO 1

F2 - Acquisition Parameters  
DATE\_ 20220118  
Time 9:11 h  
INSTRUM spect  
PROBHD 1HBOB1H\_0044 (1  
PULPROG zgpg30  
TD 65536  
SOLVENT CDCl<sub>3</sub>  
NS 4  
DS 16  
SWH 3355.705 Hz  
FIDRES 1.638529 Hz  
AQ 0.1001320 sec  
RG 64.18  
SW 149.000 usec  
DE 4.50 usec  
TE 300.2 K  
D0 0.0000000 sec  
D1 1.8000000 sec  
D11 0.0300000 sec  
D12 0.0000000 sec  
D13 0.0000000 sec  
D14 0.0000000 sec  
DMS 0.0000000 sec  
TD0V 400.1317487 MHz  
SFO1 400.1317487 MHz  
NUC1 1H  
P1 14.00 usec  
P2 14.00 usec  
P3 2500.00 usec  
P4 12.92099553 M  
P1A1 2.00399988 M  
OPNA1(1) 0.00010.100  
WFI1 10.00 %  
P1A 1000.00 usec

F1 - Acquisition parameters  
TD 132  
SFO1 400.1317487 MHz  
FIDRES 24.216482 Hz  
SW 8.186 ppm  
FWD000

F2 - Processing parameters  
SI 400.1300472 MHz  
SF 400.1300472 MHz  
WDW 0  
SSB 0  
LB 0 Hz  
GB 0  
PC 1.40

F1 - Processing parameters  
SI 1024  
MC2 0  
SF 400.1300472 MHz  
WDW 0  
SSB 0  
LB 0 Hz  
GB 0  
PC 0

# HSQC (400 MHz, CDCl<sub>3</sub>)

YZ1282-F2  
HSQC.w CDCl<sub>3</sub> /opt/topspin3.5pl2 YZ 52

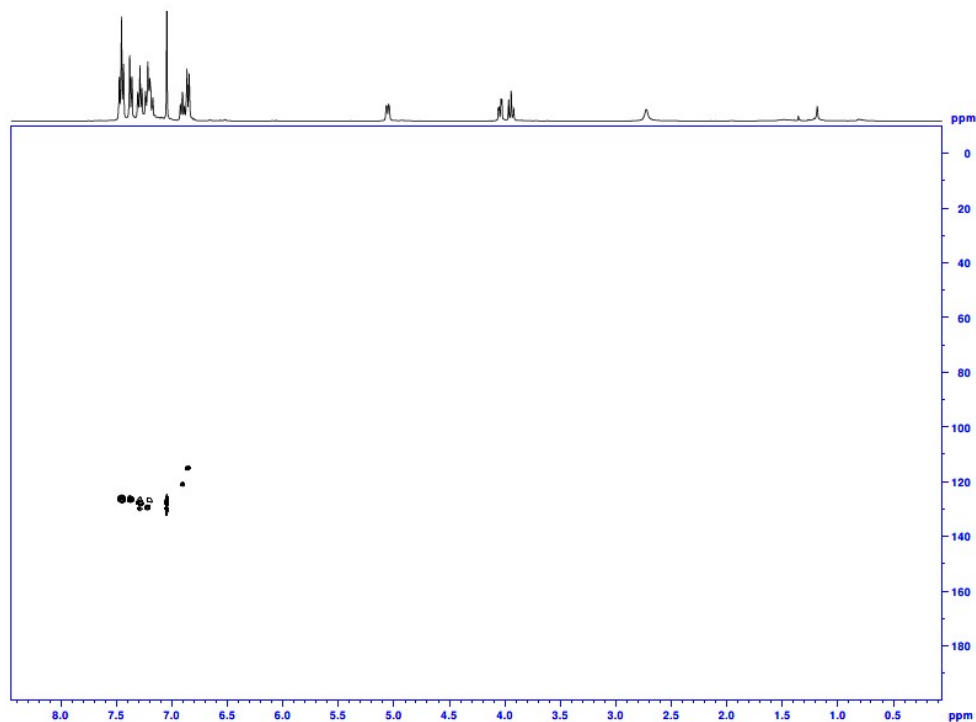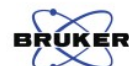

Current Data Parameters  
NAME YZ1282-F2  
EXPNO 2  
PROCNO 1

F2 - Acquisition Parameters  
DATE\_ 20220118  
Time 9:12 h  
INSTRUM spect  
PROBHD 1HBOB1H\_0044 (1  
PULPROG zgpg30  
TD 65536  
SOLVENT CDCl<sub>3</sub>  
NS 4  
DS 16  
SWH 3355.705 Hz  
FIDRES 1.638529 Hz  
AQ 0.1001320 sec  
RG 64.18  
SW 149.000 usec  
DE 4.50 usec  
TE 300.2 K  
D0 0.0000000 sec  
D1 1.8000000 sec  
D11 0.0300000 sec  
D12 0.0000000 sec  
D13 0.0000000 sec  
D14 0.0000000 sec  
DMS 0.0000000 sec  
TD0V 400.1317487 MHz  
SFO1 400.1317487 MHz  
NUC1 1H  
P1 14.00 usec  
P2 14.00 usec  
P3 2500.00 usec  
P4 12.92099553 M  
P1A1 2.00399988 M  
OPNA1(1) 0.00010.100  
WFI1 10.00 %  
P1A 1000.00 usec

F1 - Acquisition parameters  
TD 132  
SFO1 400.1317487 MHz  
FIDRES 24.216482 Hz  
SW 8.186 ppm  
FWD000

F2 - Processing parameters  
SI 400.1300472 MHz  
SF 400.1300472 MHz  
WDW 0  
SSB 0  
LB 0 Hz  
GB 0  
PC 1.40

F1 - Processing parameters  
SI 1024  
MC2 echo-antiincho  
SF 100.626185 MHz  
WDW 0  
SSB 0  
LB 0 Hz  
GB 0  
PC 0



## HMBC (400 MHz, CDCl<sub>3</sub>)

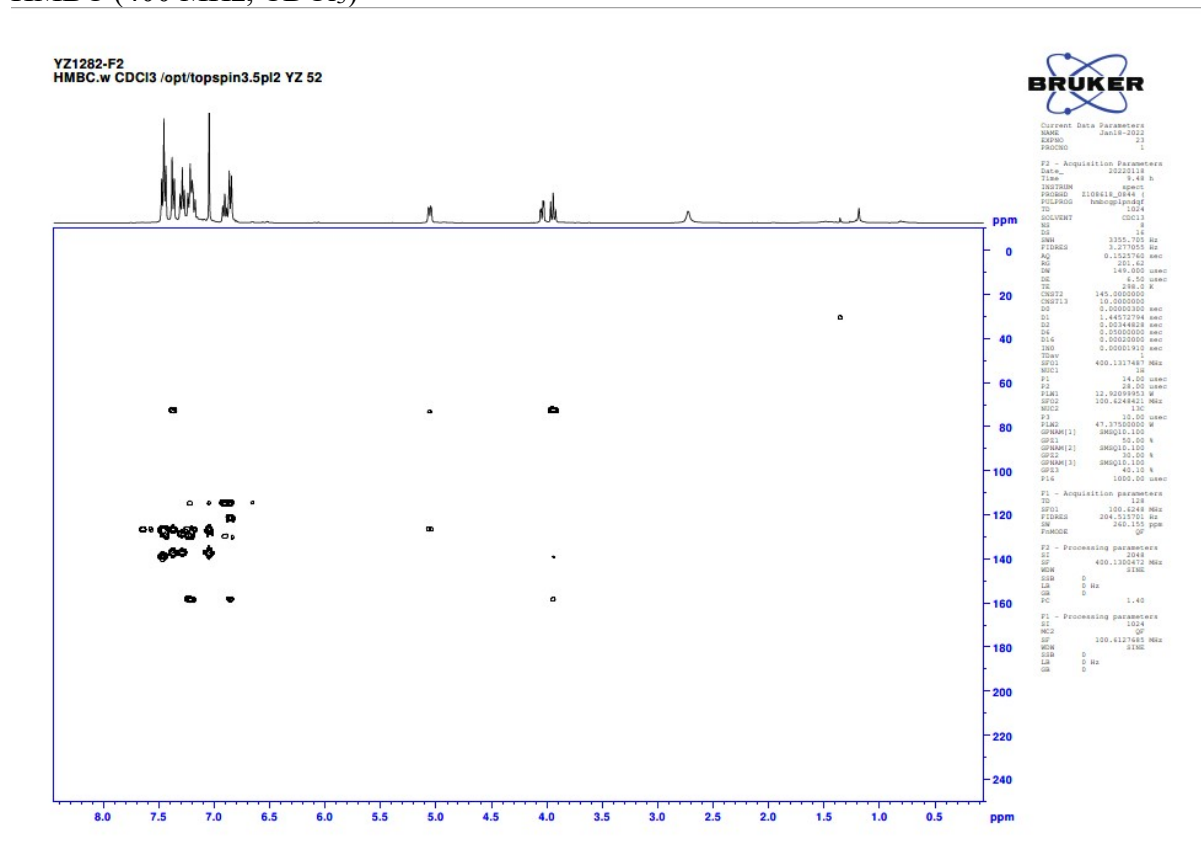

## HPLC of racemic 2-phenoxy-1-(4-styrylphenyl)ethan-1-ol **30**.

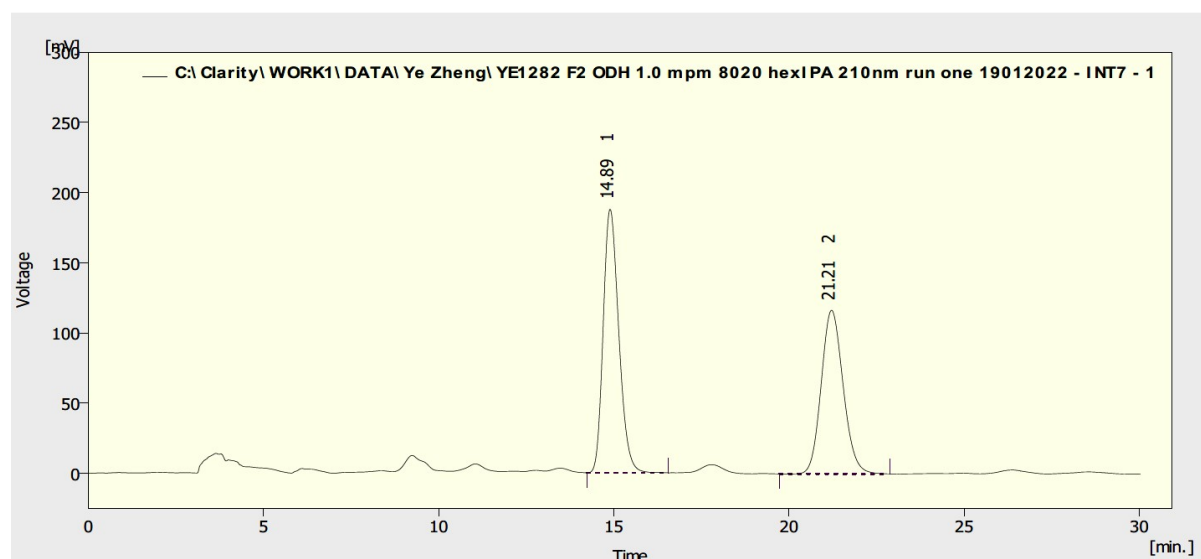

Result Table (Uncal - C:\Clarity\WORK1\DATA\Ye Zheng\YE1282 F2 ODH 1.0 mpm 8020 hexIPA 210nm run one 19012022 - INT7 - 1)

|   | Reten. Time<br>[min] | Area<br>[mV.s] | Height<br>[mV] | Area<br>[%] | Height<br>[%] | W05<br>[min] | Compound<br>Name |
|---|----------------------|----------------|----------------|-------------|---------------|--------------|------------------|
| 1 | 14.890               | 5810.358       | 187.900        | 53.4        | 61.7          | 0.48         |                  |
| 2 | 21.213               | 5078.512       | 116.595        | 46.6        | 38.3          | 0.67         |                  |
|   | Total                | 10888.870      | 304.495        | 100.0       | 100.0         |              |                  |

HPLC of 2-phenoxy-1-(4-styrylphenyl)ethan-1-ol (96% ee, *S* configuration) **30**.

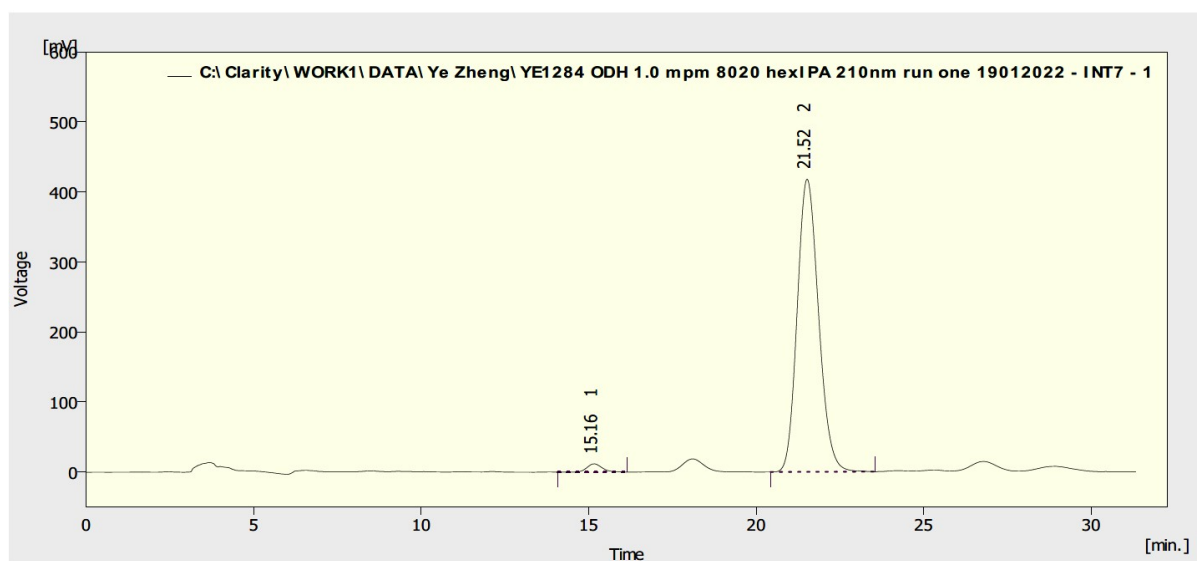

Result Table (Uncal - C:\Clarity\WORK1\DATA\Ye Zheng\YE1284 ODH 1.0 mpm 8020 hexIPA 210nm run one 19012022 - INT7 - 1)

|       | Reten. Time<br>[min] | Area<br>[mV.s] | Height<br>[mV] | Area<br>[%] | Height<br>[%] | W05<br>[min] | Compound<br>Name |
|-------|----------------------|----------------|----------------|-------------|---------------|--------------|------------------|
| 1     | 15.157               | 376.237        | 11.899         | 2.0         | 2.8           | 0.48         |                  |
| 2     | 21.523               | 18540.023      | 418.263        | 98.0        | 97.2          | 0.69         |                  |
| Total |                      | 18916.260      | 430.162        | 100.0       | 100.0         |              |                  |

1-(4-(Thiophen-2-yl)phenyl)ethan-1-ol **31**.

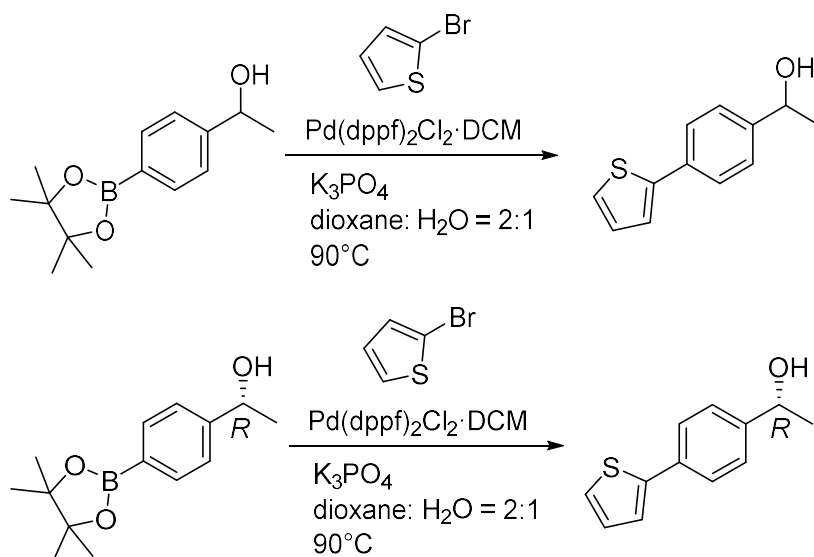

This compound is novel.

Racemic:

To a solution of racemic 1-(4-(4,4,5,5-tetramethyl-1,3,2-dioxaborolan-2-yl)phenyl)ethan-1-ol **7** (89.0 mg, 0.359 mmol), 2-bromothiophene (87.9 mg, 0.539 mmol) and tripotassium phosphate (229 mg, 1.08 mmol) in dioxane (1.8 mL) and distilled water (0.9 mL) was added  $\text{Pd(dppf)}_2\text{Cl}_2 \cdot \text{DCM}$  (14.7 mg, 0.0180 mmol). The reaction mixture was heated to  $90^\circ\text{C}$  and left stirring under the nitrogen atmosphere overnight, followed by TLC (4:1 hexane: EtOAc). The mixture was quenched by distilled water (20 mL). EtOAc (20 mL) was added and the organic layer was separated. The aqueous layer was extracted with EtOAc ( $3 \times 20$  mL), and the combined organic layers were dried ( $\text{MgSO}_4$ ) and filtered. Solvent was removed to give the crude product. The product was isolated via flash chromatography on silica eluted with 0-20% ethyl acetate in hexane to give racemic 1-(4-(thiophen-2-yl)phenyl)ethan-1-ol **31** as a yellow solid (37.0 mg, 0.181 mmol, 51%). TLC:  $R_f$  ca 0.40 (4:1 hexane: EtOAc), strong UV and  $\text{KMnO}_4$ ; Mp:  $80^\circ\text{C}$ ; HRMS: (found (ESI<sup>+</sup>):  $[\text{M}+\text{H}]^+$ , Calcd for  $\text{C}_{12}\text{H}_{12}\text{NaO}_2\text{S}$  227.0508; Found 227.0501; -3.2 ppm error;  $\nu_{\text{max}}$  3269 (br), 3100, 3067, 2969, 1426, 1406, 1256, 1208, 1070, 1004, 815, 685  $\text{cm}^{-1}$ ;  $\delta_{\text{H}}$  (400 MHz,  $\text{CDCl}_3$ ) 7.51 (2H, d,  $J = 8.1$ , ArH), 7.29 (2H, d,  $J = 8.1$ , ArH), 7.20 (2H, dd,  $J = 11.5, 4.0$ , ArH), 7.00-6.97 (1H, m, ArH), 4.81 (1H, q,  $J = 6.5$ , ArCH), 1.90 (1H, s, OH), 1.42 (3H, d,  $J = 6.5$ ,  $\text{CH}_3$ ) ppm;  $\delta_{\text{C}}$  (100 MHz,  $\text{CDCl}_3$ ) 145.09 (C),

144.15 (C), 133.65 (C), 128.05 (CH), 126.08 (CH), 125.99 (CH), 124.78 (CH), 123.08 (CH), 70.10 (CH), 25.14 (CH<sub>3</sub>) ppm; m/z (ES-API+) 227.0 (M<sup>+</sup> + 23, 100%). Enantiomeric excess and conversion determined by HPLC analysis (Chiralcel IB, 30 cm x 6mm column, hexane:iPrOH 90:10, 1.0 mL/min, T = 25°C) *S* isomer 7.2 min and *R* isomer 8.5 min.

Asymmetric.

To a solution of (*R*)-1-(4-(4,4,5,5-tetramethyl-1,3,2-dioxaborolan-2-yl)phenyl)ethan-1-ol **7** (80.0 mg, 0.323 mmol), 2-bromothiophene (79.1 mg, 0.485 mmol) and tripotassium phosphate (205 mg, 0.969 mmol) in dioxane (1.6 mL) and distilled water (0.8 mL) was added Pd(dppf)<sub>2</sub>Cl<sub>2</sub>·DCM (13.3 mg, 0.0162 mmol). The reaction mixture was heated to 90 °C and left stirring under the nitrogen atmosphere overnight, followed by TLC (4:1 hexane: EtOAc). The mixture was quenched by distilled water (20 mL). EtOAc (20 mL) was added and the organic layer was separated. The aqueous layer was extracted with EtOAc (3 × 20 mL), and the combined organic layers were dried (MgSO<sub>4</sub>) and filtered. Solvent was removed to give the crude product. The product was isolated via flash chromatography on silica eluted with 0-20% ethyl acetate in hexane to give (*R*)-1-(4-(thiophen-2-yl)phenyl)ethan-1-ol **31** as a yellow solid (44.0 mg, 0.216 mmol, 67%). The reaction was also followed by HPLC (Chiralcel IB, 30 cm x 6mm column, hexane:iPrOH 90:10, 1.0 mL/min, T = 25°C): [α]<sub>D</sub><sup>26</sup> +30.7 (c 0.176 in CHCl<sub>3</sub>) 94% ee (*R*).

<sup>1</sup>H NMR (400 MHz, CDCl<sub>3</sub>)

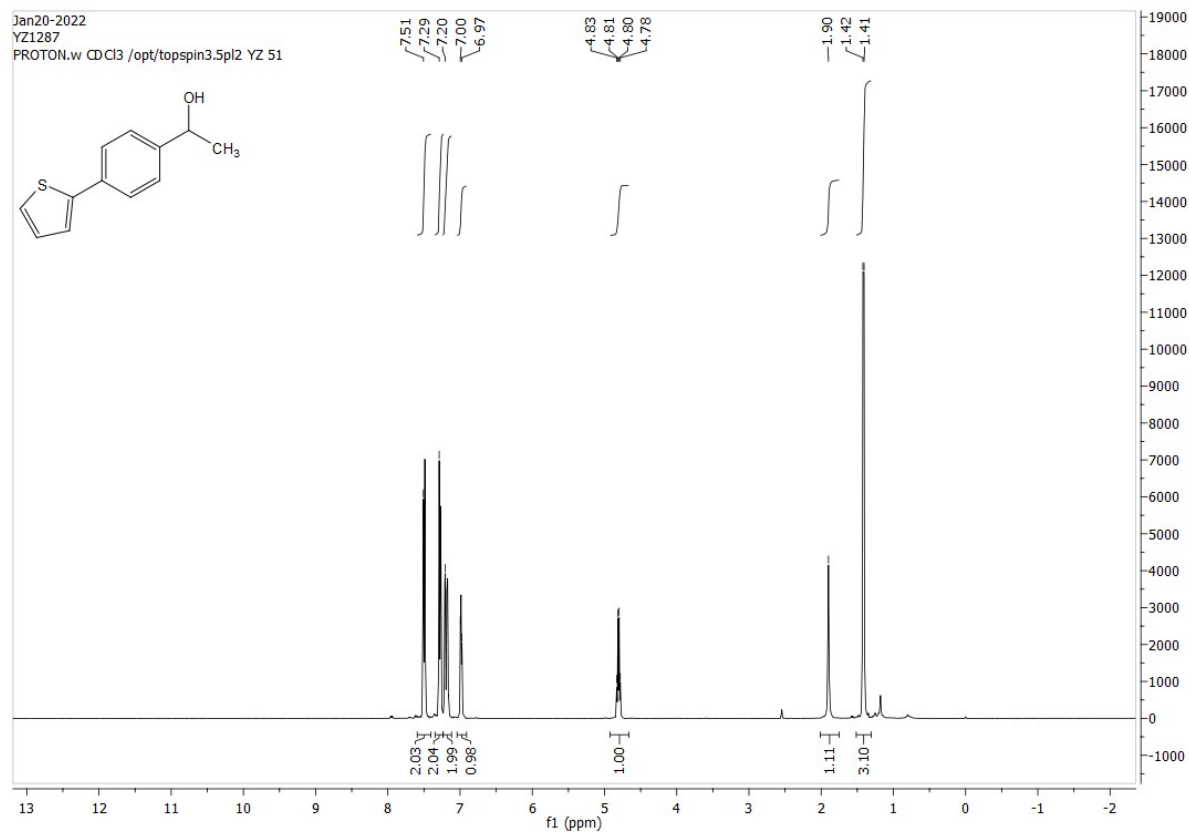

<sup>13</sup>C NMR (100 MHz, CDCl<sub>3</sub>)

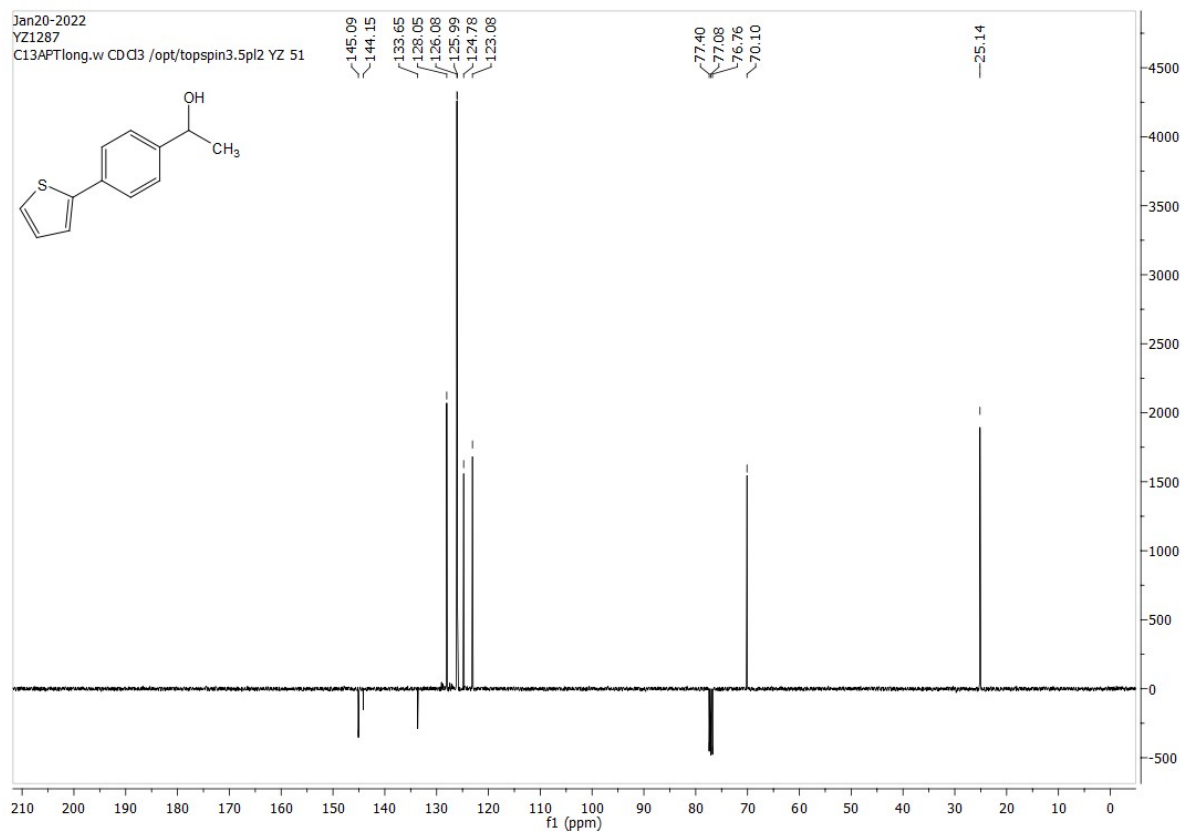

## COSY (400 MHz, CDCl<sub>3</sub>)

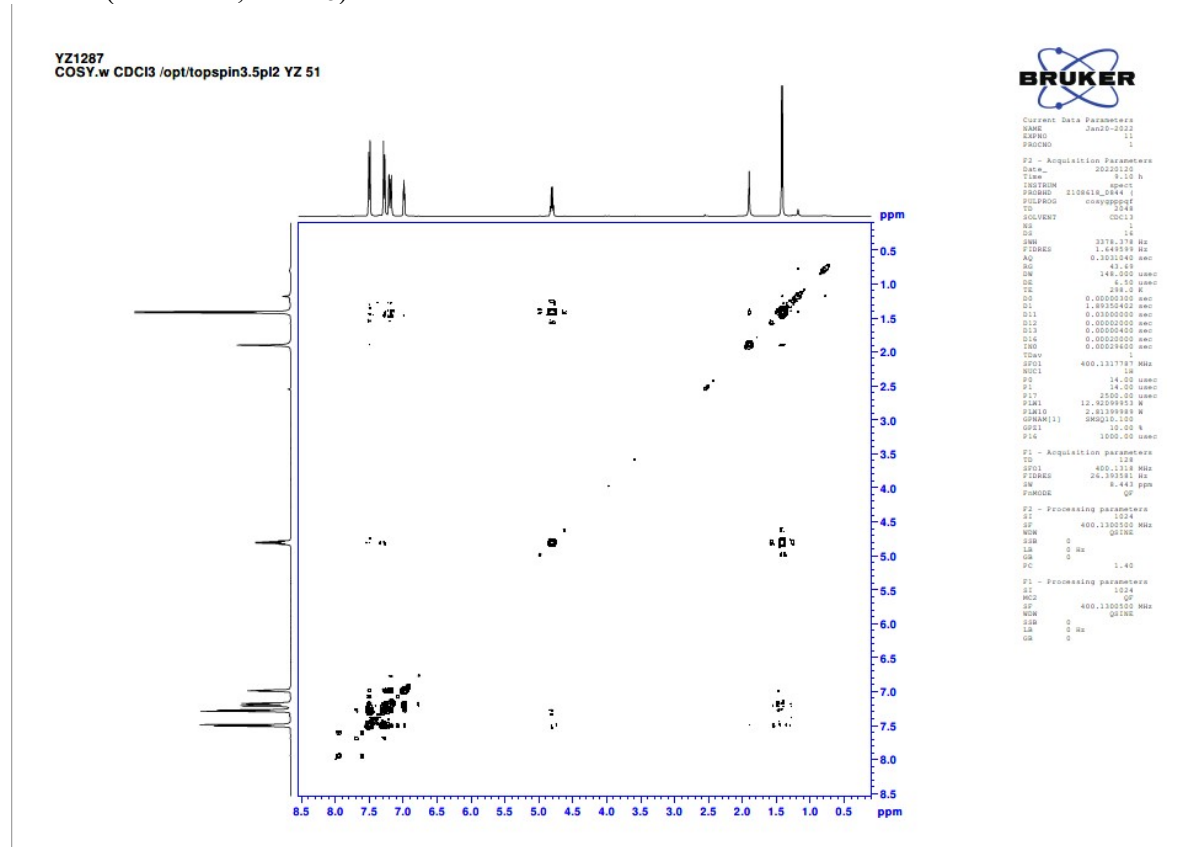

## HSQC (400 MHz, CDCl<sub>3</sub>)

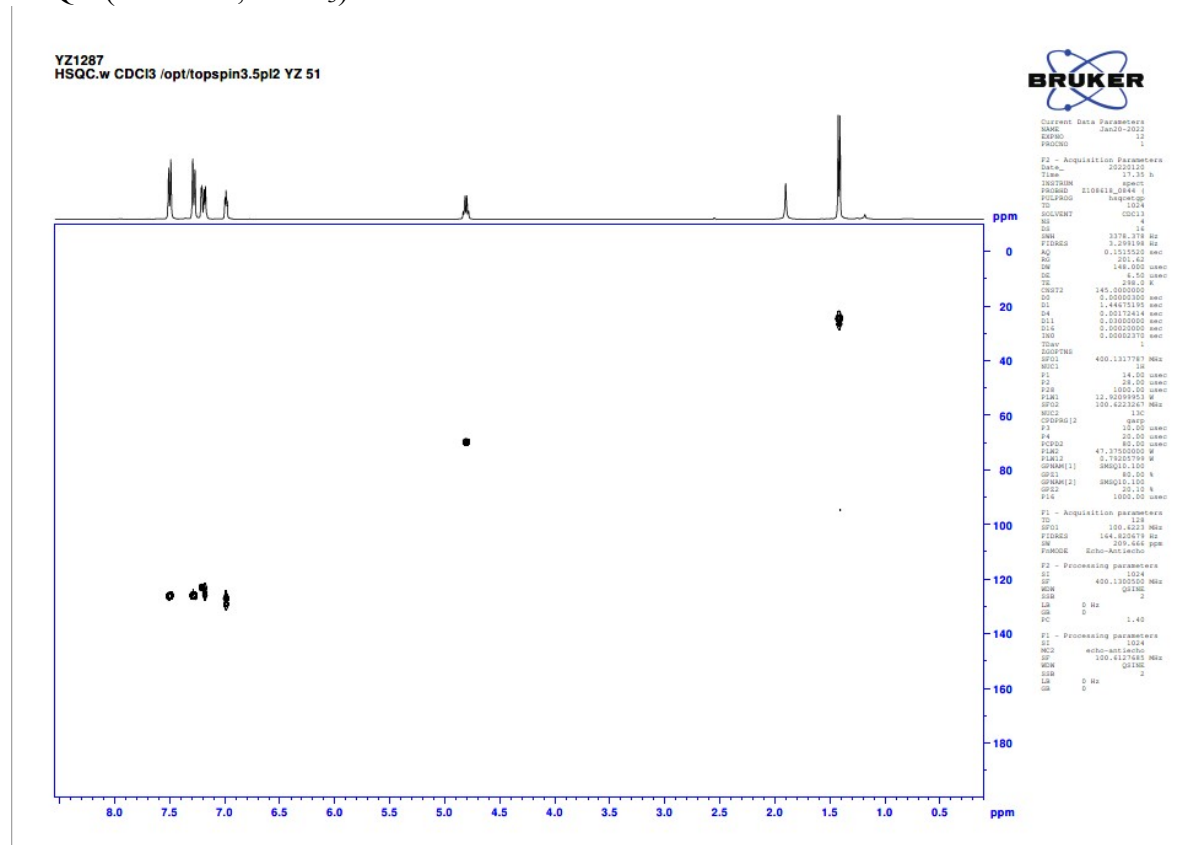

HMBC (400 MHz, CDCl<sub>3</sub>)

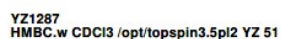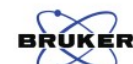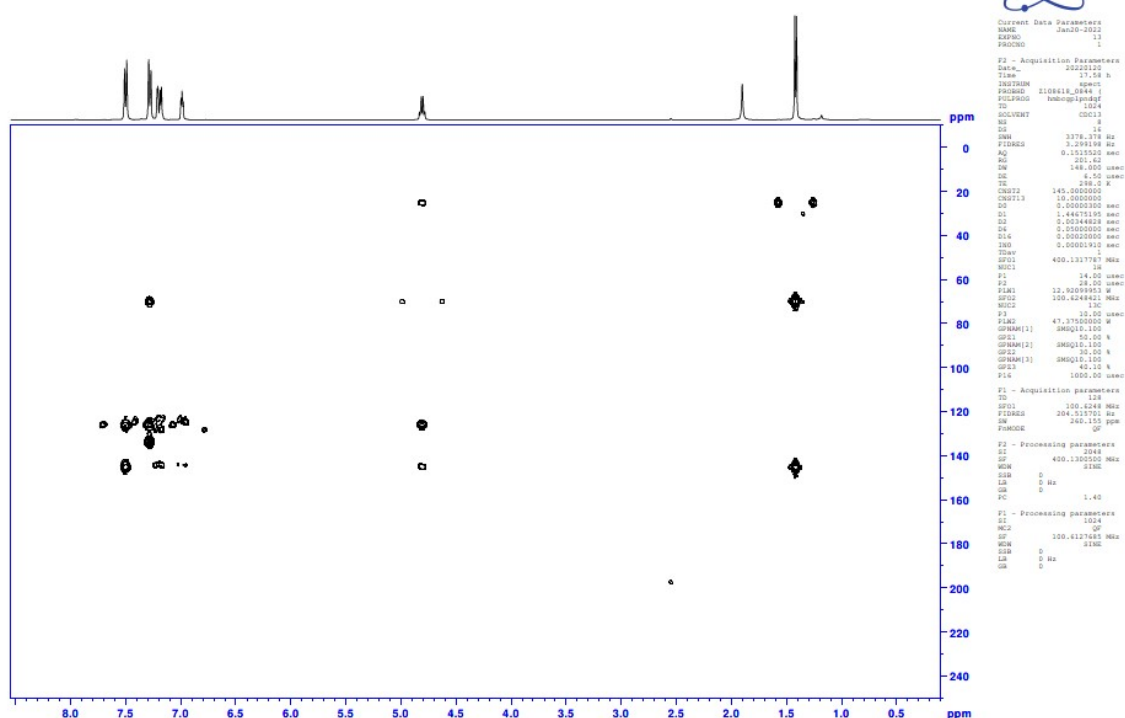HPLC of racemic 1-(4-(thiophen-2-yl)phenyl)ethan-1-ol **31**.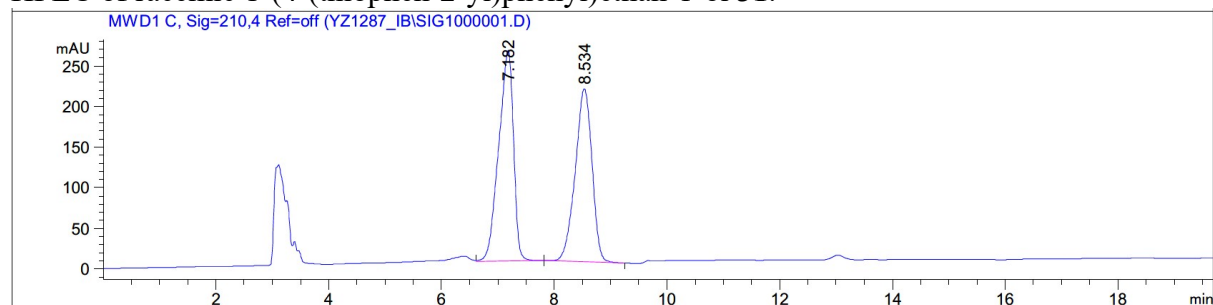

Signal 2: MWD1 C, Sig=210,4 Ref=off

| Peak # | RetTime [min] | Type | Width [min] | Area [mAU*s] | Height [mAU] | Area %  |
|--------|---------------|------|-------------|--------------|--------------|---------|
| 1      | 7.182         | VB   | 0.2672      | 4741.12158   | 259.43713    | 51.7521 |
| 2      | 8.534         | BB   | 0.3162      | 4420.10303   | 212.92924    | 48.2479 |

Totals : 9161.22461 472.36638

# HPLC of 1-(4-(thiophen-2-yl)phenyl)ethan-1-ol (94% ee, *R* configuration) **31**.

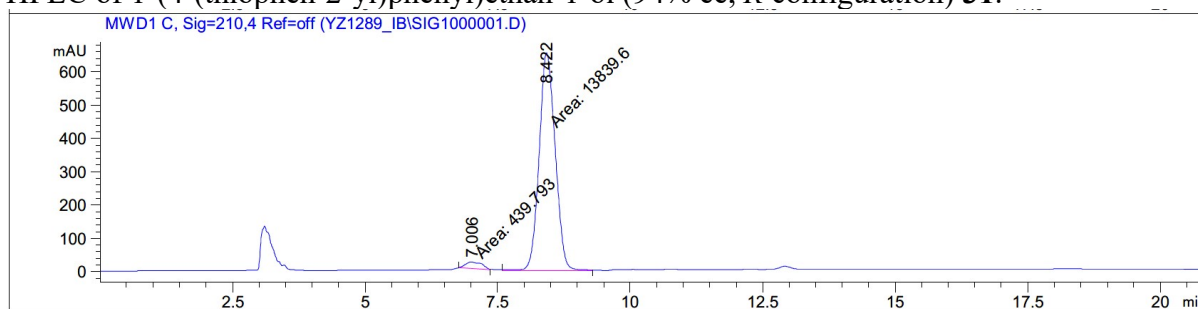

Signal 2: MWD1 C, Sig=210,4 Ref=off

| Peak # | RetTime [min] | Type | Width [min] | Area [mAU*s] | Height [mAU] | Area %  |
|--------|---------------|------|-------------|--------------|--------------|---------|
| 1      | 7.006         | MM   | 0.3669      | 439.79285    | 19.97597     | 3.0799  |
| 2      | 8.422         | MM   | 0.3524      | 1.38396e4    | 654.60272    | 96.9201 |

Totals : 1.42794e4 674.57869



2-Phenoxy-1-(4-(thiophen-2-yl)phenyl)ethan-1-ol **32**.

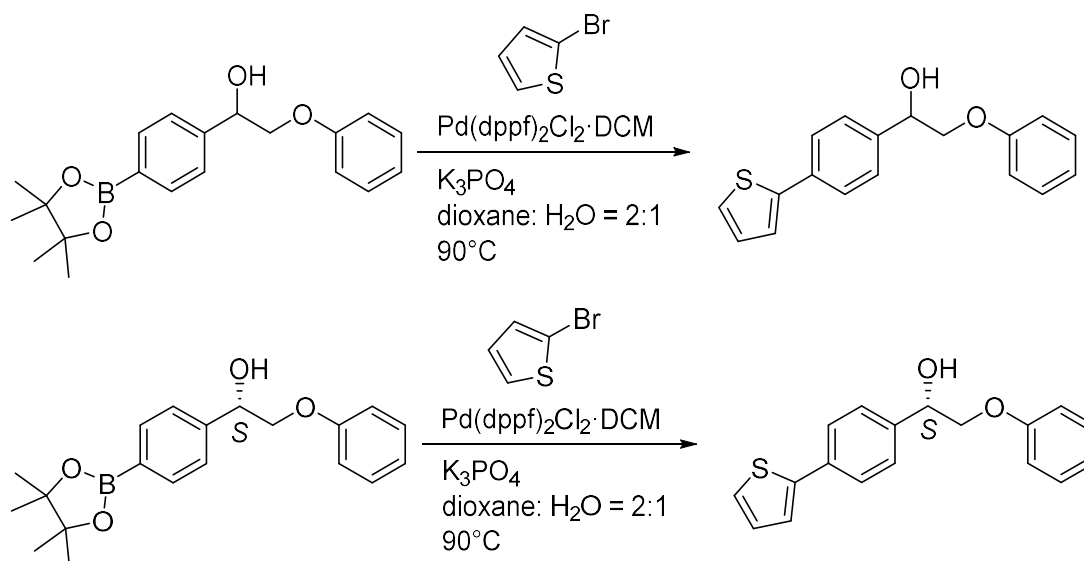

This compound is novel.

Racemic.

To a solution of racemic 2-phenoxy-1-(4-(4,4,5,5-tetramethyl-1,3,2-dioxaborolan-2-yl)phenyl)ethan-1-ol **12** (82.0 mg, 0.241 mmol), 2-bromothiophene (59.0 mg, 0.362 mmol) and tripotassium phosphate (153 mg, 0.723 mmol) in dioxane (1.2 mL) and distilled water (0.6 mL) was added Pd(dppf)<sub>2</sub>Cl<sub>2</sub>·DCM (9.89 mg, 0.0121 mmol). The reaction mixture was heated to 90 °C and left stirring under the nitrogen atmosphere overnight, followed by TLC (4:1 hexane: EtOAc). The mixture was quenched by distilled water (20 mL). EtOAc (20 mL) was added and the organic layer was separated. The aqueous layer was extracted with EtOAc (3 × 20 mL), and the combined organic layers were dried (MgSO<sub>4</sub>) and filtered. Solvent was removed to give the crude product. The product was isolated via flash chromatography on silica eluted with 0-20% ethyl acetate in hexane to give racemic 2-phenoxy-1-(4-(thiophen-2-yl)phenyl)ethan-1-ol **32** as a yellow solid (45.0 mg, 0.152 mmol, 63%). TLC: R<sub>f</sub> ca 0.40 (4:1 hexane: EtOAc), strong UV and KMnO<sub>4</sub>; Mp: 104 °C; HRMS: (found (ESI<sup>+</sup>): [M+H]<sup>+</sup>, Calcd for C<sub>18</sub>H<sub>16</sub>NaO<sub>2</sub>S 319.0759; Found 319.0763; 1.3 ppm error; ν<sub>max</sub> 3382 (br), 3104, 3066, 3027, 2922, 2868, 1597, 1586, 1493, 1453, 1300, 1290, 1239, 1078, 1037, 1017 816, 751, 688 cm<sup>-1</sup>; δ<sub>H</sub> (400 MHz, CDCl<sub>3</sub>) 7.55 (2H, d, *J* = 8.0, ArH), 7.38 (2H, d, *J* = 8.0, ArH), 7.24-7.19 (4H, m, ArH + H of thiophene), 7.00 (1H, t, *J* = 4.2, H of thiophene), 6.90 (1H, t, *J* = 7.3, ArH), 6.85 (2H, d, *J* = 8.2, ArH), 5.05 (1H, dd, *J* = 8.6, 2.6, ArCH), 4.04 (1H, dd, *J* = 9.5, 2.9, CH<sub>2</sub>), 3.93 (1H, t, *J* =

9.1, CH<sub>2</sub>), 2.76 (1H, s, OH) ppm;  $\delta_c$  (100 MHz, CDCl<sub>3</sub>) 158.38 (C), 143.97 (C), 138.89 (C), 134.36 (C), 129.62 (CH), 128.10 (CH), 126.89 (CH), 126.12 (CH), 125.00 (CH), 123.30 (CH), 121.40 (CH), 114.69 (CH), 73.18 (CH<sub>2</sub>), 72.34 (CH) ppm;  $m/z$  (ES-API+) 319.1 ( $M^+ + 23$ , 100%).

Enantiomeric excess and conversion determined by HPLC analysis (Chiralcel IB, 30 cm x 6mm column, hexane:iPrOH 90:10, 1.0 mL/min, T = 25°C) *R* isomer 12.0 min and *S* isomer 19.9 min.

Asymmetric.

To a solution of (*S*)-2-phenoxy-1-(4-(4,4,5,5-tetramethyl-1,3,2-dioxaborolan-2-yl)phenyl)ethan-1-ol **12** (86.0 mg, 0.253 mmol), 2-bromothiophene (61.9 mg, 0.380 mmol) and tripotassium phosphate (161 mg, 0.759 mmol) in dioxane (1.3 mL) and distilled water (0.7 mL) was added Pd(dppf)<sub>2</sub>Cl<sub>2</sub>·DCM (10.4 mg, 0.0127 mmol). The reaction mixture was heated to 90 °C and left stirring under the nitrogen atmosphere overnight, followed by TLC (4:1 hexane: EtOAc). The mixture was quenched by distilled water (20 mL). EtOAc (20 mL) was added and the organic layer was separated. The aqueous layer was extracted with EtOAc (3 × 20 mL), and the combined organic layers were dried (MgSO<sub>4</sub>) and filtered. Solvent was removed to give the crude product. The product was isolated via flash chromatography on silica eluted with 0-20% ethyl acetate in hexane to give (*S*)-2-phenoxy-1-(4-(thiophen-2-yl)phenyl)ethan-1-ol **32** as a yellow solid (47.0 mg, 0.159 mmol, 63%). The reaction was also followed by HPLC (Chiralcel IB, 30 cm x 6mm column, hexane:iPrOH 90:10, 1.0 mL/min, T = 25°C):  $[\alpha]_D^{26} +33.6$  (c 0.180 in CHCl<sub>3</sub>) 96% ee (*S*)

$^1\text{H}$  NMR (400 MHz,  $\text{CDCl}_3$ )

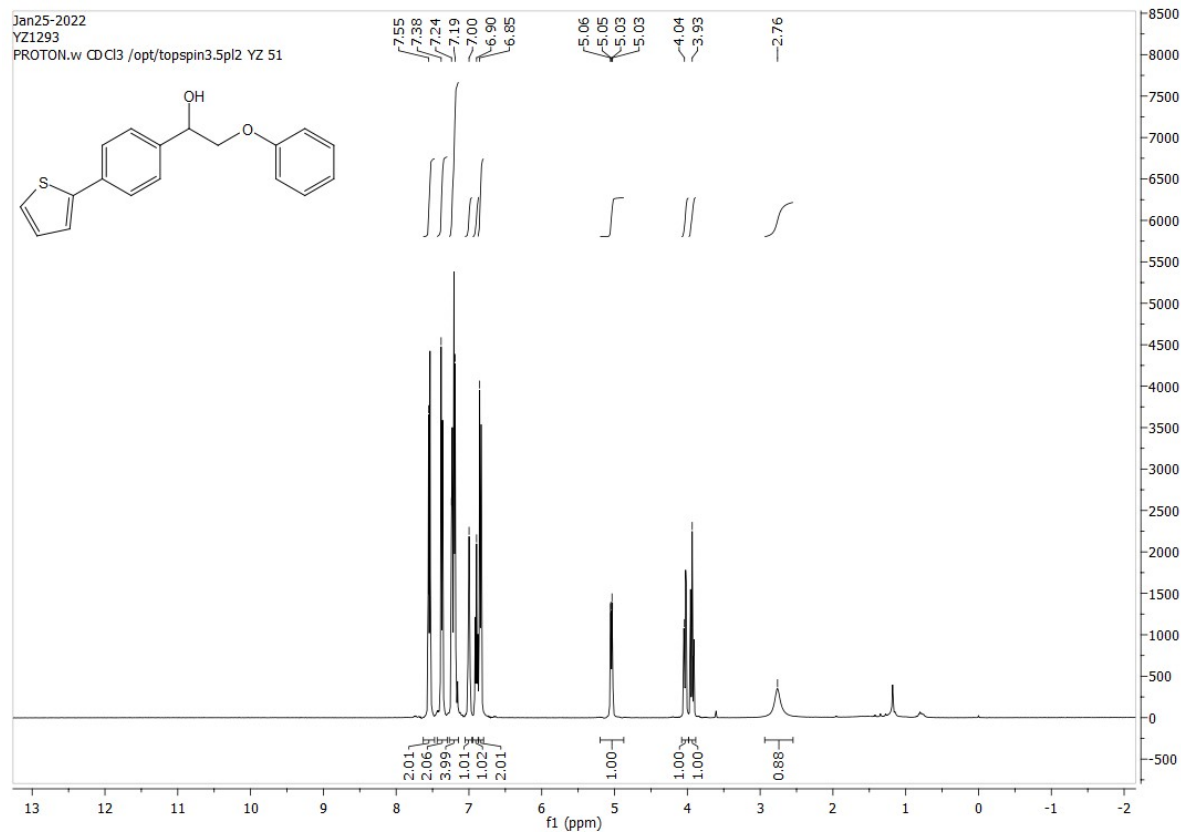

$^{13}\text{C}$  NMR (100 MHz,  $\text{CDCl}_3$ )

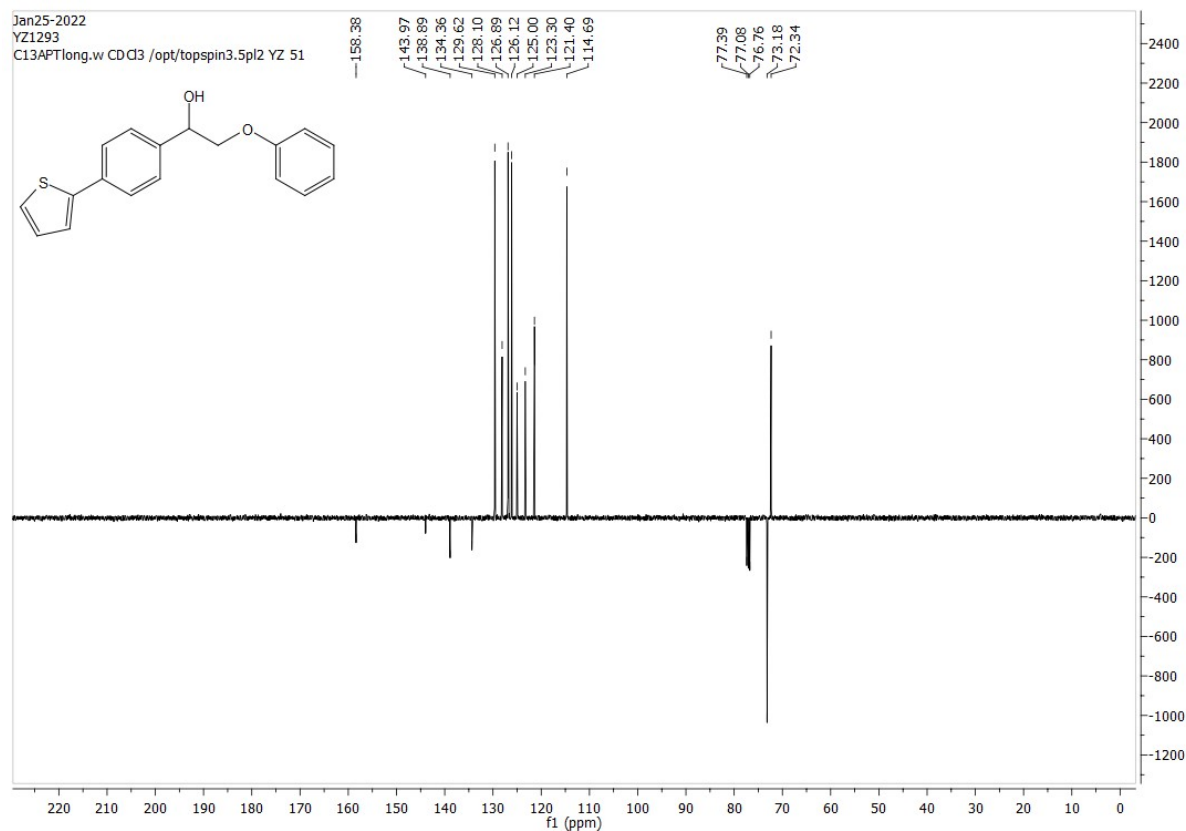

## COSY (400 MHz, CDCl<sub>3</sub>)

YZ1293  
COSY.w CDCl<sub>3</sub> /opt/topspin3.5pl2 YZ 51

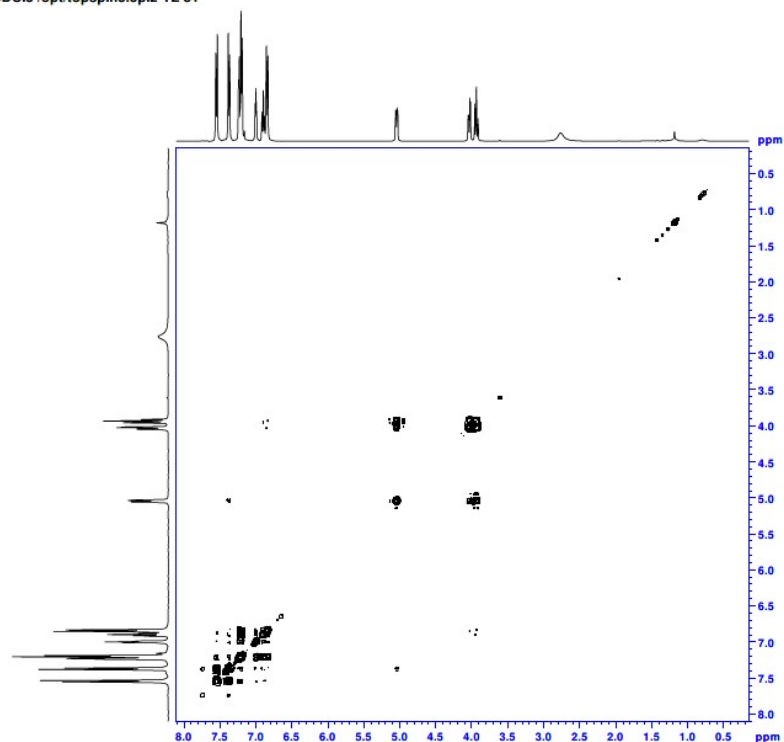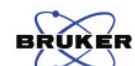

Current Data Parameters  
NAME Jan25-2022  
EXPNO 11  
PROCNO 1

F2 - Acquisition Parameters  
Date\_ 20220125  
Time 8.39 h  
INSTRUM spect  
PROBHD 1H0618\_0044  
PULPROG zgpg30  
TD 65536  
SOLVENT CDCl<sub>3</sub>  
NS 16  
DS 4  
SWH 3184.713 Hz  
FIDRES 1.555334 Hz  
AQ 0.3215140 sec  
RG 49.97  
SW 157.0000 sec  
DE 4.10 sec  
TE 298.2 K  
D0 0.0000300 sec  
D1 1.8750700 sec  
D11 0.0300000 sec  
D12 0.0000000 sec  
D13 0.0000000 sec  
D16 0.0000000 sec  
DRO 0.0000000 sec  
TD0 400.1317022 MHz  
NUC1 1H  
NUC2 1H  
P1 14.00 sec  
P2 14.00 sec  
P3 2500.00 sec  
PL1 12.9209993 Hz  
PL12 2.8239993 Hz  
GRAB[1] SMOUL1.100  
GR1 20.10 Hz  
P16 1000.00 sec

F1 - Acquisition parameters  
TD 65536  
SF01 400.1317 MHz  
FIDRES 1.555334 Hz  
SW 157.0000 sec  
PULPROG zgpg30

F2 - Processing parameters  
SI 32768  
SF 400.1317022 MHz  
WDW EM  
SSB 0  
LB 0 Hz  
GB 0  
PC 1.40

F1 - Processing parameters  
SI 32768  
SF 400.1317022 MHz  
WDW EM  
SSB 0  
LB 0 Hz  
GB 0

## HSQC (400 MHz, CDCl<sub>3</sub>)

YZ1293  
HSQC.w CDCl<sub>3</sub> /opt/topspin3.5pl2 YZ 51

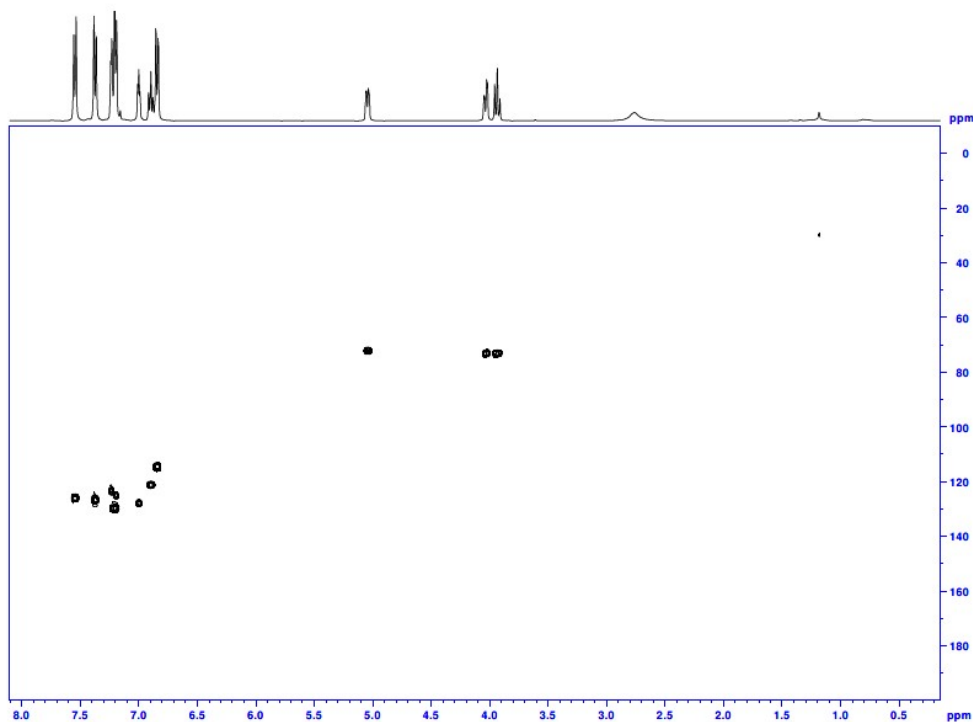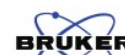

Current Data Parameters  
NAME Jan25-2022  
EXPNO 12  
PROCNO 1

F2 - Acquisition Parameters  
Date\_ 20220125  
Time 8.43 h  
INSTRUM spect  
PROBHD 1H0618\_0044  
PULPROG zgpg30  
TD 65536  
SOLVENT CDCl<sub>3</sub>  
NS 16  
DS 4  
SWH 3184.713 Hz  
FIDRES 1.555334 Hz  
AQ 0.3215140 sec  
RG 49.97  
SW 157.0000 sec  
DE 4.10 sec  
TE 298.2 K  
D0 0.0000300 sec  
D1 1.8750700 sec  
D11 0.0300000 sec  
D12 0.0017244 sec  
D13 0.0000000 sec  
D16 0.0000000 sec  
DRO 0.0000000 sec  
TD0 400.1317022 MHz  
NUC1 1H  
NUC2 13C  
P1 14.00 sec  
P2 28.00 sec  
P3 2500.00 sec  
PL1 12.9209993 Hz  
PL12 2.8239993 Hz  
GRAB[1] SMOUL1.100  
GR1 20.10 Hz  
P16 1000.00 sec

F1 - Acquisition parameters  
TD 65536  
SF01 400.6223 MHz  
FIDRES 1.54800078 Hz  
SW 209.444 sec  
PULPROG zgpg30

F2 - Processing parameters  
SI 32768  
SF 400.1317022 MHz  
WDW EM  
SSB 0  
LB 0 Hz  
GB 0  
PC 1.40

F1 - Processing parameters  
SI 32768  
SF 400.6223 MHz  
WDW EM  
SSB 0  
LB 0 Hz  
GB 0

YZ1293  
HMBC.w CDC13 /opt/topspin3.5pl2 YZ 51

**BRUKER**

Current Data Parameters  
Date\_ 20220115  
Time 9:50 A  
F2 - Acquisition Parameters  
Data\_ 20220115  
INSTRUM spect  
PROBHD Z100R14-0044  
PULPROG hmcgpg1p000f  
TD 1024  
SOLVENT CDC13  
NS 8  
DS 4  
SWH 3184.713 Hz  
FIDRES 3.110079 Hz  
AQ 0.1407680 sec  
RG 251.62  
DM 157.000 usec  
DE 6.50 usec  
TE 298.2 K  
CHET2 145.0000000  
CHET13 10.0000000  
SFO 5.000000000 sec  
SFO 1.43753600 sec  
SFO 0.10348600 sec  
SFO 0.00000000 sec  
SFO 400.1307622 MHz  
SFO 14.00 usec  
SFO 28.00 usec  
SFO 12.92000000 Hz  
SFO 100.6248421 MHz  
SFO 1.00 usec  
SFO 47.37500000 Hz  
SFO 40.10 usec  
SFO 100.00 usec  
SFO 40.10 usec  
SFO 100.00 usec  
F1 - Acquisition parameters  
TD 128  
SFO 100.6248421 MHz  
FIDRES 204.215701 Hz  
DM 240.155 ppm  
FWDGDE 0F  
F2 - Processing parameters  
SI 2048  
WDW 400.1307622 MHz  
SSB 0  
LB 0 Hz  
GB 0  
PC 1.40  
F1 - Processing parameters  
SI 1024  
WDW 0F  
SSB 100.6127641 MHz  
LB 0 Hz  
GB 0

MWD1 C, Sig=210,4 Ref=off (YZ1293\_IB\_2\SIG1000001.D)

The chromatogram displays two prominent peaks. The first peak is at a retention time of 12.013 minutes, reaching a maximum absorbance of approximately 1100 mAU. The second peak is at 19.891 minutes, reaching a maximum absorbance of approximately 800 mAU. The baseline is stable with minor noise and small peaks around 3 and 18 minutes.

| Retention Time (min) | Approximate mAU |
|----------------------|-----------------|
| 12.013               | 1100            |
| 19.891               | 800             |

| Peak # | RetTime [min] | Type | Width [min] | Area [mAU*s] | Height [mAU] | Area %  |
|--------|---------------|------|-------------|--------------|--------------|---------|
| 1      | 12.013        | VV   | 0.2309      | 1.94369e4    | 1296.40540   | 49.1425 |
| 2      | 19.891        | BB   | 0.3835      | 2.01152e4    | 810.63892    | 50.8575 |

S225

# HPLC of 2-phenoxy-1-(4-styrylphenyl)ethan-1-ol (96% ee, *S* configuration)

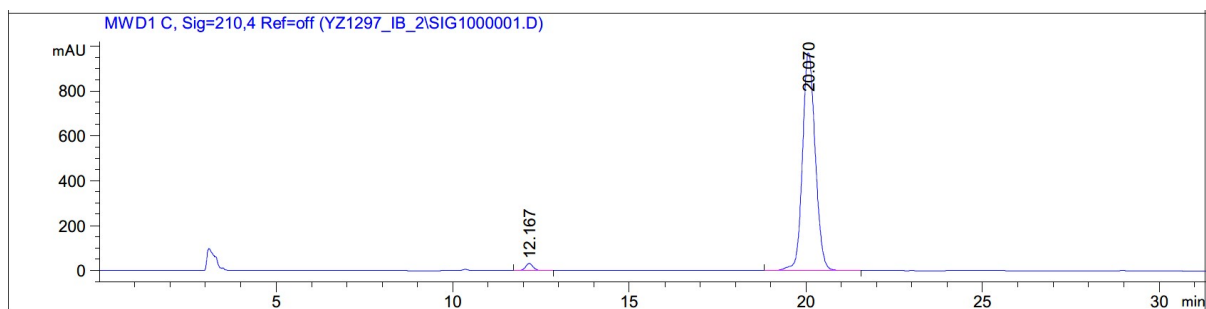

Signal 2: MWD1 C, Sig=210,4 Ref=off

| Peak # | RetTime [min] | Type | Width [min] | Area [mAU*s] | Height [mAU] | Area %  |
|--------|---------------|------|-------------|--------------|--------------|---------|
| 1      | 12.167        | BB   | 0.2254      | 455.74054    | 31.39051     | 1.8301  |
| 2      | 20.070        | BB   | 0.3892      | 2.44474e4    | 972.84558    | 98.1699 |

Totals : 2.49032e4 1004.23609
